# Supplementary material for: Establishment of a Patient-Derived Xenograft Model of Colorectal Cancer in CIEA NOG Mice and Exploring Smartfish Liquid Diet as a Source of Omega-3 Fatty Acids
Source: MDPI journal article supplement (doi:10.3390/biomedicines9030282), 2021-03-10
Supplement: s1 [file s1]

# Supplementary Materials

| Content:                | Page    |
|-------------------------|---------|
| • Supplementary file 1: | 2-158   |
| • Supplementary file 2: | 159-160 |
| • Supplementary file 3: | 161     |
| • Supplementary file 4: | 162     |
| • Supplementary file 5: | 163-164 |

# Supplementary file 1

-Figures are named by:  
supplementary file 1 - mouse # - figure #

| Content:    | Page:   |
|-------------|---------|
| • Mouse 12: | 3-10    |
| • Mouse 15: | 11-17   |
| • Mouse 16: | 18-24   |
| • Mouse 17: | 25-28   |
| • Mouse 18: | 29-33   |
| • Mouse 19: | 34-40   |
| • Mouse 20: | 41-47   |
| • Mouse 21: | 48-51   |
| • Mouse 22: | 52-58   |
| • Mouse 23: | 59-70   |
| • Mouse 24: | 71-80   |
| • Mouse 25: | 81-90   |
| • Mouse 26: | 91-105  |
| • Mouse 27: | 106-111 |
| • Mouse 28: | 112-117 |
| • Mouse 29: | 118-123 |
| • Mouse 30: | 124-132 |
| • Mouse 31: | 133-141 |
| • Mouse 32: | 142-150 |
| • Mouse 33: | 151-158 |



# Mouse 12

- Surgery date: 01.04.19
  - Age (weeks) 11
  - Weight (g) 20.5
  - Tumor fragment P3-1A
  - Ear marks 1
  - Fragment size 4\*4 mm

Page 3

| MUS                                     |                 |               | FOTS                 |
|-----------------------------------------|-----------------|---------------|----------------------|
| Kjønn ♀                                 | Stamme CIEA NoG | Alder/vekt 6u | Antall 1             |
| Bruker Caroline H. Pettersen            |                 |               | Ankomst dato 25/2-19 |
| # 12                                    |                 |               |                      |
| 01.04.19 Sett inn xenograft P3-1A mus 1 |                 |               |                      |

**Supplementary figure 1-12-1.**  
Pictures from the engraftment day.

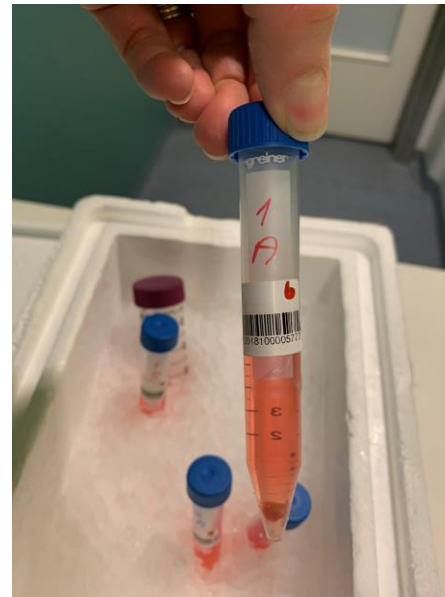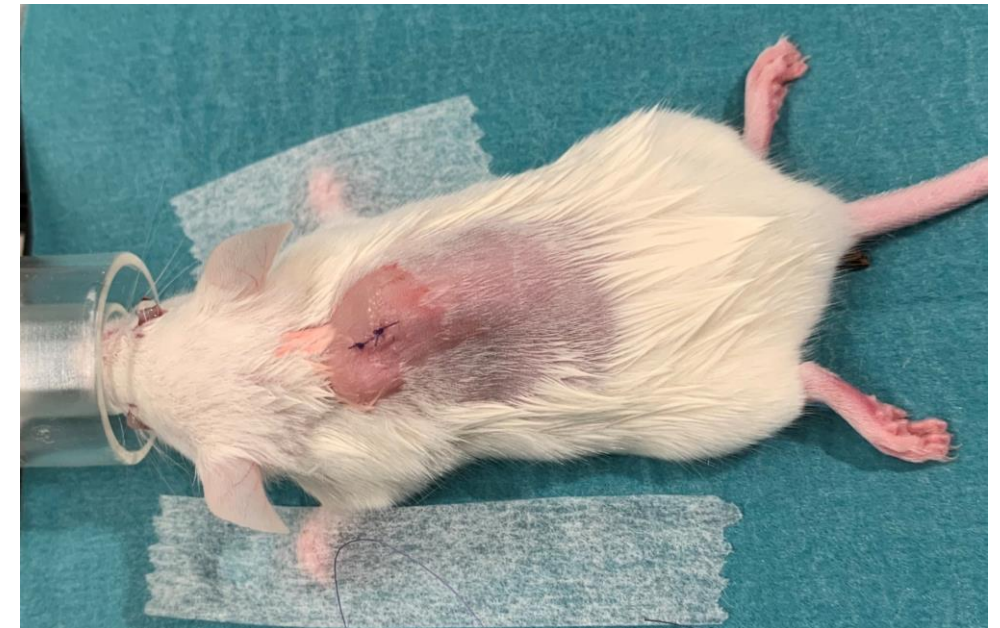



Supplementary figure 1-2. Pictures from follow up and tumor size measurement

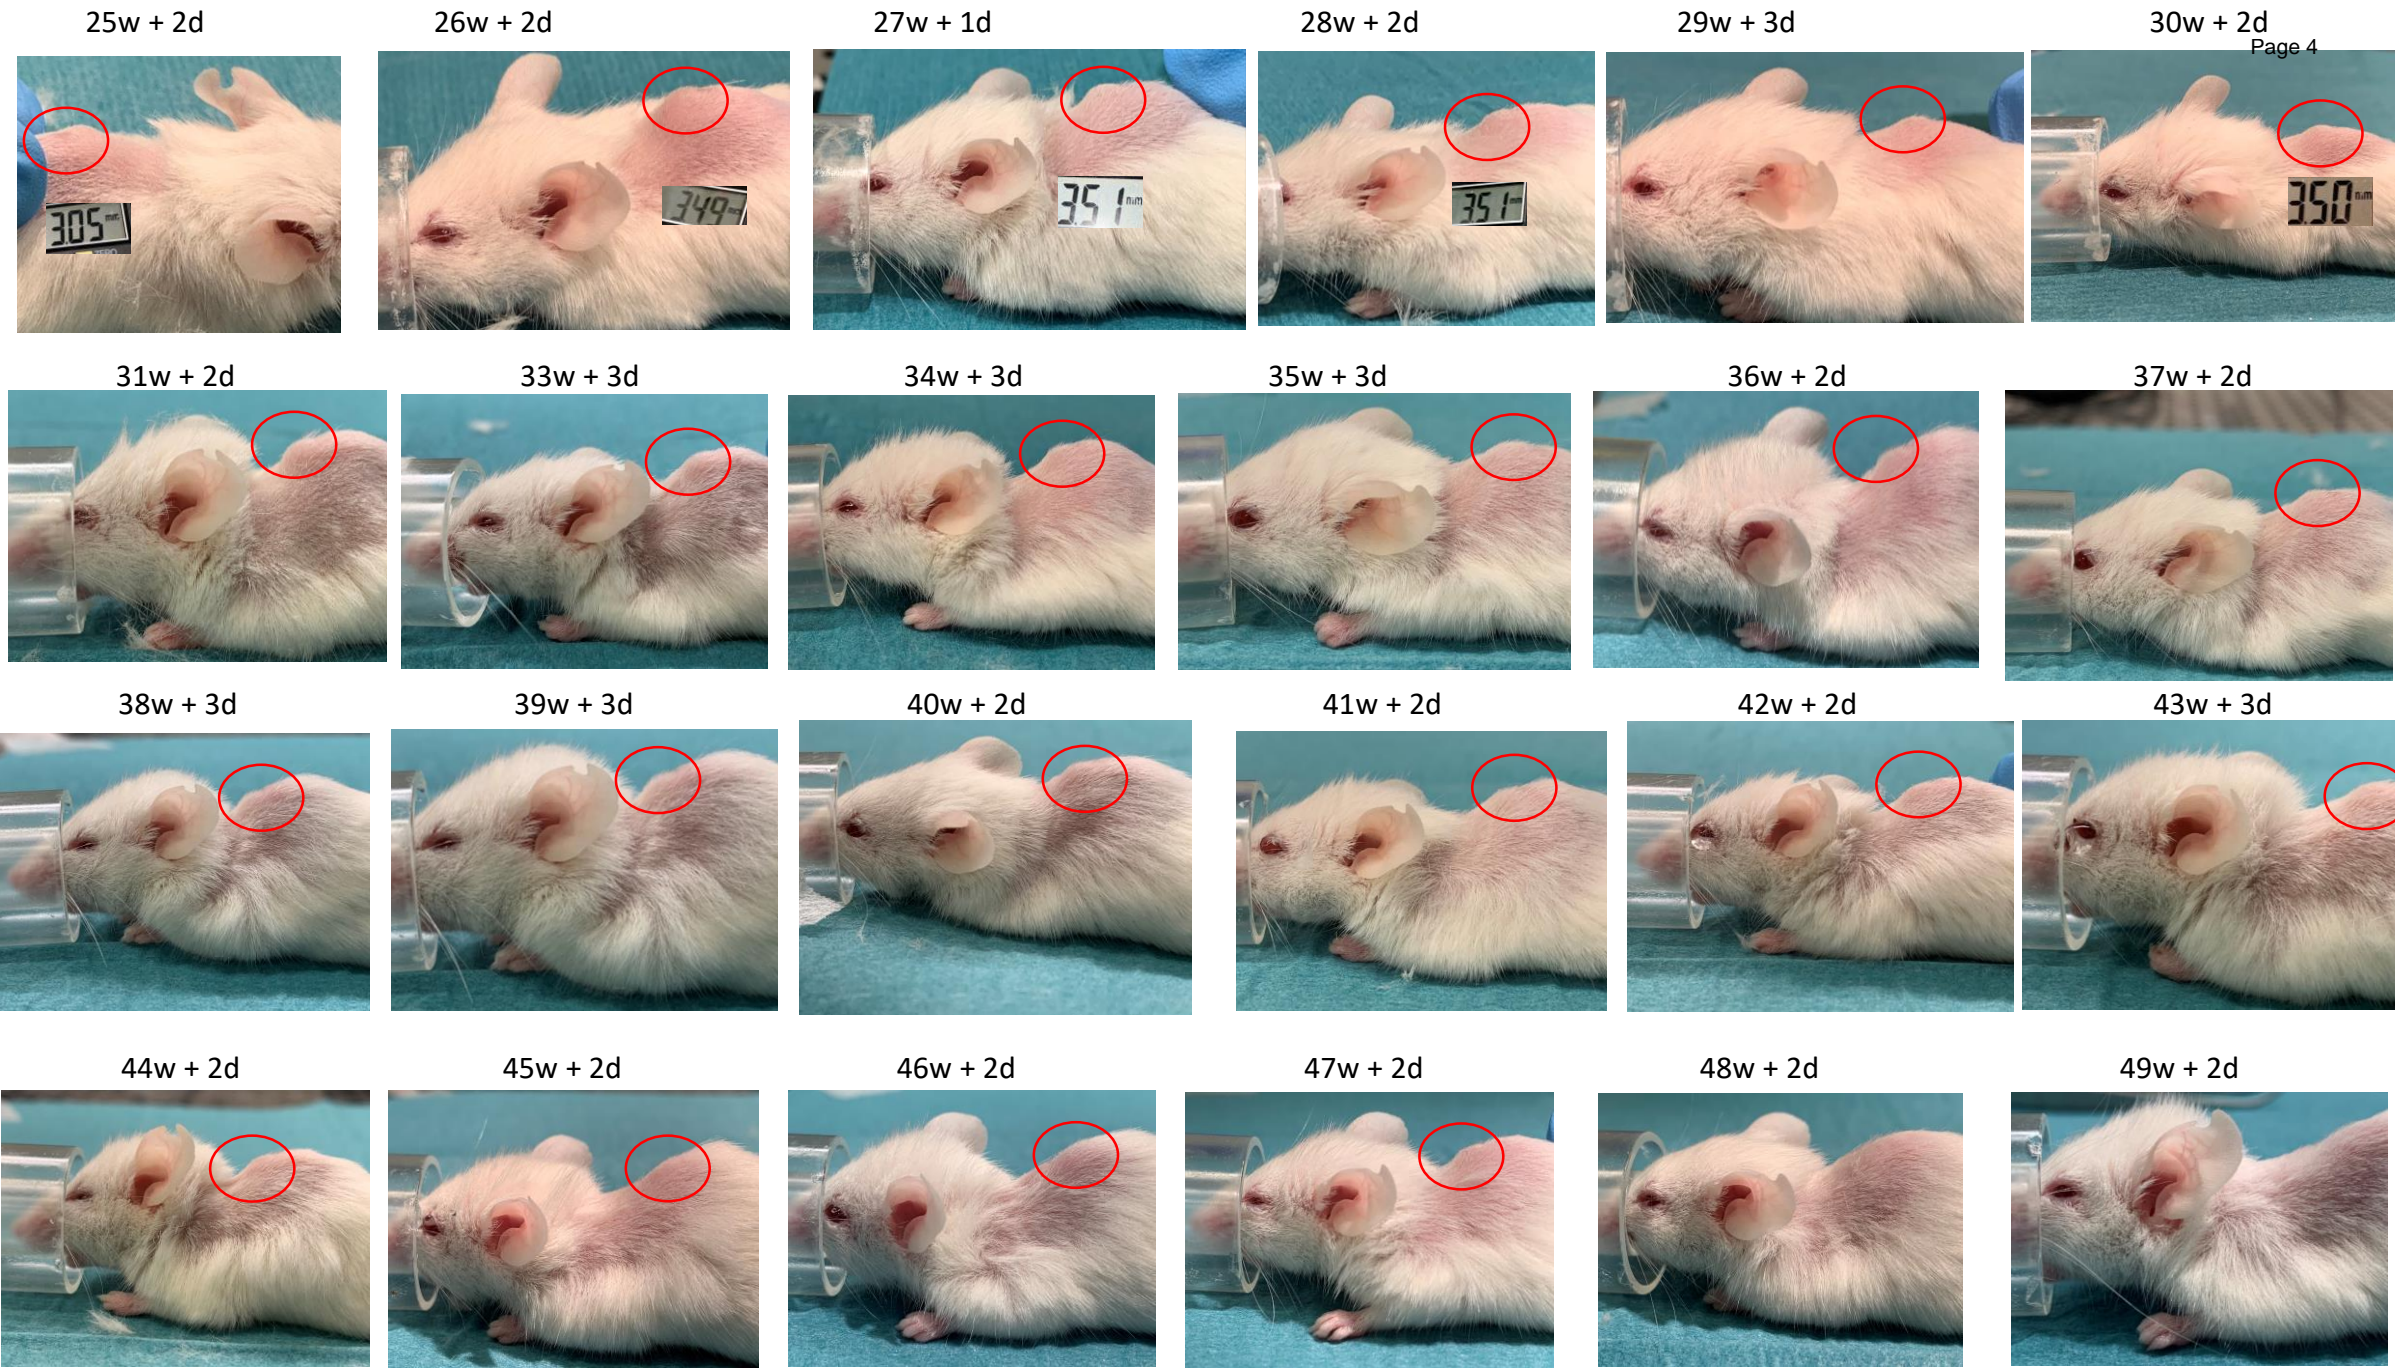



## Treatment:

- Mouse 12 was used as a «social mouse» during treatment with Smartfish containing fish oil for mouse 17
  - Did not have growing xenograft at that time, were suspected to have removed xenograft itself

## Supplementary figure 1-12-3. Pictures from euthanization of mouse 12 (11.03.2020 / 49w + 2d)

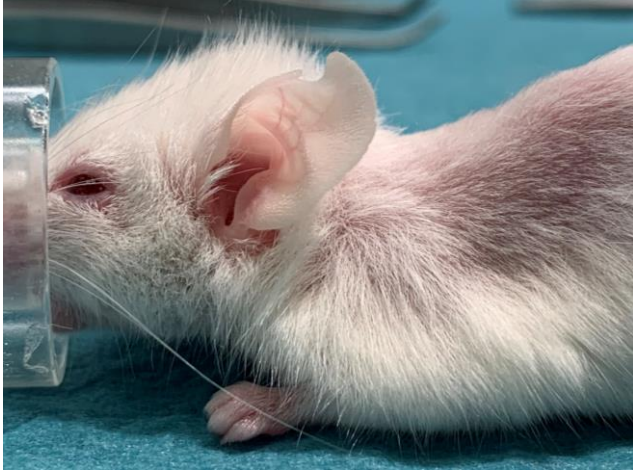

Xenograft almost not visible

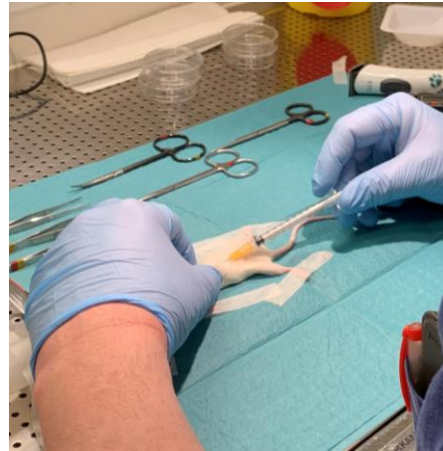

Necropsy

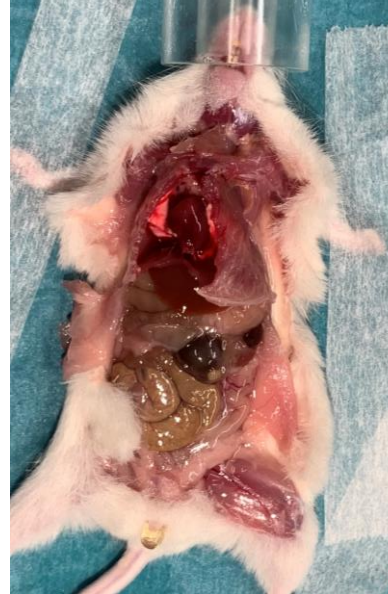

Necropsy

| AUTOPSY CARD                                     |                             |                      |                    |                                                                    |                                      |
|--------------------------------------------------|-----------------------------|----------------------|--------------------|--------------------------------------------------------------------|--------------------------------------|
| NUMBER<br>12 (P3-1a)klipp1                       | Male                        | Female               | STRAIN<br>CIEA NUG | BIRTH DATE                                                         | EXPERIMENT<br>PDX - xenograft 1/4/19 |
| AGE AT DEATH                                     | DEATH MODE<br>DATE 11.03.20 |                      |                    | GROUP<br>Pottersen, Caroline                                       |                                      |
| CLINICAL SYMPTOMS AT DEATH<br>Fresh/healthy      |                             |                      |                    |                                                                    |                                      |
| ORGAN WEIGHT                                     |                             | SECTION TAKEN        |                    |                                                                    |                                      |
| ORGAN                                            | WEIGHT                      | ORGAN                | YES                | GROSS OBSERVATION                                                  |                                      |
| Femur                                            | CH                          | 1) Lung + Heart      | X                  | Sent som histe/lunge or nie som ansvaret, fjell lunge og mformalin |                                      |
| Liver                                            | L                           | 2) Liver             | X                  | Liten, bare litten litten?                                         |                                      |
|                                                  |                             | 3) Kidney            | X                  | Normal                                                             |                                      |
|                                                  |                             | 4) Adrenal           |                    |                                                                    |                                      |
| Spleen                                           |                             | 5) Testis/Ovary      |                    |                                                                    |                                      |
|                                                  | MP                          | 6) Spleen + pancreas | X                  | Size? ca 1,3mm normal, pancreas m/blet/humer?                      |                                      |
| Kidney                                           |                             | 7) Lymph nodes       |                    |                                                                    |                                      |
|                                                  |                             | 8) Bone marrow       |                    |                                                                    |                                      |
| Testis/Ovary                                     | X                           | 9) xenograft         | X                  | visible? en liten forhegning under huden, tatt ut til HES          |                                      |
|                                                  | T                           | 10) thymus           | X                  |                                                                    |                                      |
|                                                  |                             | 11)                  |                    |                                                                    |                                      |
|                                                  |                             | 12)                  |                    |                                                                    |                                      |
|                                                  |                             | 13)                  |                    |                                                                    |                                      |
| Notes:<br>Blodhort ✓<br>Blodplasma ✓<br>Bilder ✓ |                             |                      |                    |                                                                    |                                      |

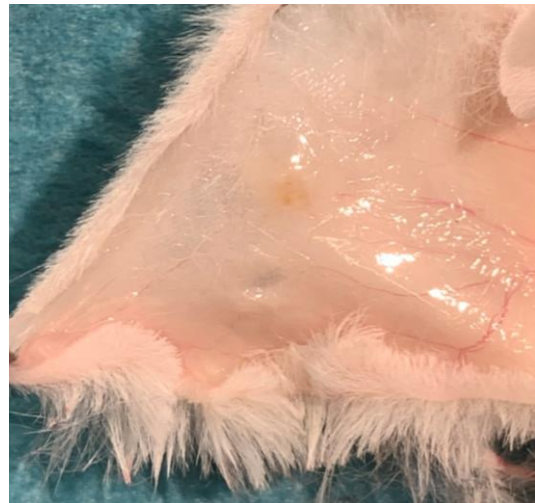

Only small trace visible of xenograft

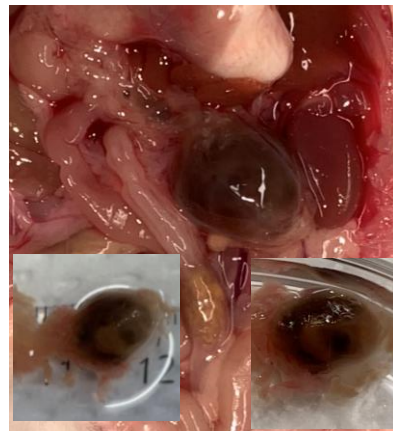

Undefined dark «bladder» with liquid close to pancreas.

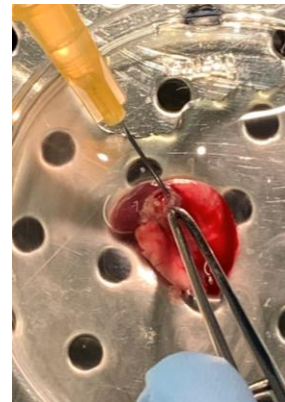

Lungs filled with formalin

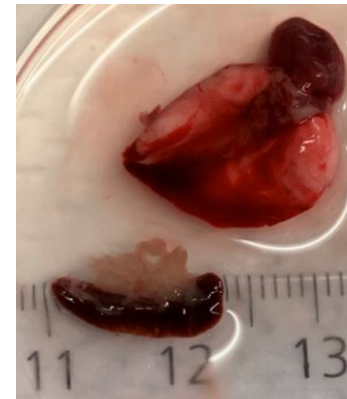

Spleen, lungs and heart

Autopsy card modified from:

[http://www.pathbase.net/Necropsy\\_of\\_the\\_Mouse/](http://www.pathbase.net/Necropsy_of_the_Mouse/)



Supplementary figure 1-12-4. Pictures of scoresheets

NTNU Score sheet FOTS: Avdeling for komparativ medisin (AKM) Responsible researcher: xengraft 1/4-19 Animal ID: 1 (P3 1a) (12)

| Parameter                                               | State                                        | Assessment scale | Date   | Date | Date | Date        | Date        | Date        | Date        | Date        | Date        | Date |
|---------------------------------------------------------|----------------------------------------------|------------------|--------|------|------|-------------|-------------|-------------|-------------|-------------|-------------|------|
| General appearance                                      | Normal                                       | 0                | 2.4.19 | 3.4  | 5.4  | 11.4        | 24.4        | 30.4        | 7.5.19      | 15.5.19     | 21.5        | 4/6  |
|                                                         | Reduced grooming                             | 1                |        | 0    | 0    | 0           | 0           | 0           | 0           | 0           | 0           |      |
|                                                         | Minor distention of abdomen, rough hair coat | 3                |        |      |      |             |             |             |             |             |             |      |
|                                                         | Hunchback or distended abdomen, inactive     | 18               |        |      |      |             |             |             |             |             |             |      |
| Behaviour (Level of activity)                           | Normal                                       | 0                |        |      |      |             |             |             |             |             |             |      |
|                                                         | Slightly reduced                             | 1                | 1      | 1    | 0    | 0           | 0           | 0           | 0           | 0           | 0           |      |
|                                                         | Moderately reduced                           | 3                |        |      |      |             |             |             |             |             |             |      |
|                                                         | Distressed behaviour due to growing tumour   | 3                |        |      |      |             |             |             |             |             |             |      |
|                                                         | Obviously reduced                            | 5                |        |      |      |             |             |             |             |             |             |      |
|                                                         | Isolated, inactive, lethargic                | 18               |        |      |      |             |             |             |             |             |             |      |
| Body weight (Compared to body weight before experiment) | Body weight:                                 |                  | 20.2   |      |      | 20.2        | 21.5        | 21.6        | 21.5        | 21.8        | 22.9        | 24.3 |
|                                                         | No loss                                      | 0                |        |      |      | 0           | 0           |             | 0           | 0           | 0           |      |
|                                                         | Loss < 5%                                    | 1                |        |      |      |             |             |             |             |             |             |      |
|                                                         | Loss 5-9%                                    | 3                |        |      |      |             |             |             |             |             |             |      |
|                                                         | Loss 10-14%                                  | 5                |        |      |      |             |             |             |             |             |             |      |
|                                                         | Loss ≥ 15%                                   | 18               |        |      |      |             |             |             |             |             |             |      |
| Clinical signs (Infection, bleeding, discoloration)     | Normal                                       | 0                | 0      |      | 0    | 5x5mm x-ray | 5x5mm x-ray | 5x5mm x-ray | 5x5mm x-ray | 5x5mm x-ray | 5x5mm x-ray | 4x4  |
|                                                         | Minor irritation around surgical wound       | 1                |        |      |      |             |             |             |             |             |             |      |
|                                                         | Moderate irritation/infected surgical wound  | 3                |        |      |      |             |             |             |             |             |             |      |
|                                                         | Infected/open surgical wound                 | 4 *              |        |      |      |             |             |             |             |             |             |      |
|                                                         | Tumour > 1.0 cm in diameter                  | 10               |        |      |      |             |             |             |             |             |             |      |
|                                                         | Tumour > 1.5 cm in diameter                  | 18               |        |      |      |             |             |             |             |             |             |      |
|                                                         | Ulcerous tumour                              | 18               |        |      |      |             |             |             |             |             |             |      |
|                                                         | Total:                                       |                  |        |      |      |             |             |             |             |             |             |      |
| Comments, treatments etc:                               |                                              |                  |        |      |      |             |             |             |             |             |             |      |

NTNU Score sheet FOTS: Avdeling for komparativ medisin (AKM) Responsible researcher: xengraft 1/4-19 Animal ID: 1 (P3 1a) (12)

| Parameter                                               | State                                        | Assessment scale | Date    | Date | Date | Date | Date | Date | Date | Date | Date | Date |
|---------------------------------------------------------|----------------------------------------------|------------------|---------|------|------|------|------|------|------|------|------|------|
| General appearance                                      | Normal                                       | 0                | 11/6-14 | 14/6 | 18/6 | 25/6 | 09/7 | 7/7  | 13/8 | 19/8 | 26/8 | 4/9  |
|                                                         | Reduced grooming                             | 1                |         |      |      |      |      |      |      |      |      |      |
|                                                         | Minor distention of abdomen, rough hair coat | 3                |         |      |      |      |      | 0    |      | 0    |      |      |
|                                                         | Hunchback or distended abdomen, inactive     | 18               |         |      |      |      |      |      |      |      |      |      |
| Behaviour (Level of activity)                           | Normal                                       | 0                |         |      |      |      |      |      |      |      |      |      |
|                                                         | Slightly reduced                             | 1                |         |      |      |      |      |      |      |      |      |      |
|                                                         | Moderately reduced                           | 3                |         |      |      |      |      |      |      |      |      |      |
|                                                         | Distressed behaviour due to growing tumour   | 3                |         |      |      |      |      | 0    |      |      |      |      |
|                                                         | Obviously reduced                            | 5                |         |      |      |      |      |      |      |      |      |      |
|                                                         | Isolated, inactive, lethargic                | 18               |         |      |      |      |      |      |      |      |      |      |
| Body weight (Compared to body weight before experiment) | Body weight:                                 |                  | 23.1    |      | 21.9 | 23   | 23.7 | 21.7 | 22.7 | 23.6 | 22.3 | 22.7 |
|                                                         | No loss                                      | 0                |         |      |      |      |      |      |      |      |      |      |
|                                                         | Loss < 5%                                    | 1                |         |      |      |      |      |      |      |      |      |      |
|                                                         | Loss 5-9%                                    | 3                |         |      |      |      |      |      |      |      |      |      |
|                                                         | Loss 10-14%                                  | 5                |         |      |      |      |      |      |      |      |      |      |
|                                                         | Loss ≥ 15%                                   | 18               |         |      |      |      |      |      |      |      |      |      |
| Clinical signs (Infection, bleeding, discoloration)     | Normal                                       | 0                |         |      |      |      |      |      |      |      |      |      |
|                                                         | Minor irritation around surgical wound       | 1                |         |      |      |      |      |      |      |      |      |      |
|                                                         | Moderate irritation/infected surgical wound  | 3                |         |      |      |      |      |      |      |      |      |      |
|                                                         | Infected/open surgical wound                 | 4 *              |         |      |      |      |      |      |      |      |      |      |
|                                                         | Tumour > 1.0 cm in diameter                  | 10               |         |      |      |      |      |      |      |      |      |      |
|                                                         | Tumour > 1.5 cm in diameter                  | 18               |         |      |      |      |      |      |      |      |      |      |
|                                                         | Ulcerous tumour                              | 18               |         |      |      |      |      |      |      |      |      |      |
|                                                         | Total:                                       |                  |         |      |      |      |      |      |      |      |      |      |
| Comments, treatments etc:                               |                                              |                  |         |      |      |      |      |      |      |      |      |      |

NTNU Score sheet FOTS: Avdeling for komparativ medisin (AKM) Responsible researcher: xengraft 1/4-19 Animal ID: 1 (P3 1a) (12)

| Parameter                                               | State                                        | Assessment scale | Date | Date | Date | Date | Date | Date | Date | Date | Date | Date |
|---------------------------------------------------------|----------------------------------------------|------------------|------|------|------|------|------|------|------|------|------|------|
| General appearance                                      | Normal                                       | 0                | 12/4 | 9/9  | 11/9 | 13/9 | 16/9 | 18/9 | 23/9 | 25/9 | 30/9 | 4/10 |
|                                                         | Reduced grooming                             | 1                |      |      |      |      |      |      |      |      |      |      |
|                                                         | Minor distention of abdomen, rough hair coat | 3                |      |      |      |      |      |      |      |      |      |      |
|                                                         | Hunchback or distended abdomen, inactive     | 18               |      |      |      |      |      |      |      |      |      |      |
| Behaviour (Level of activity)                           | Normal                                       | 0                |      |      |      |      |      |      |      |      |      |      |
|                                                         | Slightly reduced                             | 1                |      |      |      |      |      |      |      |      |      |      |
|                                                         | Moderately reduced                           | 3                |      |      |      |      |      |      |      |      |      |      |
|                                                         | Distressed behaviour due to growing tumour   | 3                |      |      |      |      |      |      |      |      |      |      |
|                                                         | Obviously reduced                            | 5                |      |      |      |      |      |      |      |      |      |      |
|                                                         | Isolated, inactive, lethargic                | 18               |      |      |      |      |      |      |      |      |      |      |
| Body weight (Compared to body weight before experiment) | Body weight:                                 |                  | 22.7 | 22.9 | 23.3 | 23.5 | 22   | 21.9 | 22.3 | 22.7 | 21.8 | 21.9 |
|                                                         | No loss                                      | 0                |      |      |      |      |      |      |      |      |      |      |
|                                                         | Loss < 5%                                    | 1                |      |      |      |      |      |      |      |      |      |      |
|                                                         | Loss 5-9%                                    | 3                |      |      |      |      |      |      |      |      |      |      |
|                                                         | Loss 10-14%                                  | 5                |      |      |      |      |      |      |      |      |      |      |
|                                                         | Loss ≥ 15%                                   | 18               |      |      |      |      |      |      |      |      |      |      |
| Clinical signs (Infection, bleeding, discoloration)     | Normal                                       | 0                |      |      |      |      |      |      |      |      |      |      |
|                                                         | Minor irritation around surgical wound       | 1                |      |      |      |      |      |      |      |      |      |      |
|                                                         | Moderate irritation/infected surgical wound  | 3                |      |      |      |      |      |      |      |      |      |      |
|                                                         | Infected/open surgical wound                 | 4 *              |      |      |      |      |      |      |      |      |      |      |
|                                                         | Tumour > 1.0 cm in diameter                  | 10               |      |      |      |      |      |      |      |      |      |      |
|                                                         | Tumour > 1.5 cm in diameter                  | 18               |      |      |      |      |      |      |      |      |      |      |
|                                                         | Ulcerous tumour                              | 18               |      |      |      |      |      |      |      |      |      |      |
|                                                         | Total:                                       |                  |      |      |      |      |      |      |      |      |      |      |
| Comments, treatments etc:                               |                                              |                  |      |      |      |      |      |      |      |      |      |      |

NTNU Score sheet FOTS: Avdeling for komparativ medisin (AKM) Responsible researcher: xengraft 1/4-19 Animal ID: 1 (P3 1a) (12)

| Parameter                                               | State                                        | Assessment scale | Date | Date | Date  | Date  | Date  | Date  | Date  | Date  | Date  | Date |
|---------------------------------------------------------|----------------------------------------------|------------------|------|------|-------|-------|-------|-------|-------|-------|-------|------|
| General appearance                                      | Normal                                       | 0                | 4/10 | 8/10 | 11/10 | 14/10 | 16/10 | 18/10 | 21/10 | 23/10 | 23/10 | 1/11 |
|                                                         | Reduced grooming                             | 1                |      |      |       |       |       |       |       |       |       |      |
|                                                         | Minor distention of abdomen, rough hair coat | 3                |      |      |       |       |       |       |       |       |       |      |
|                                                         | Hunchback or distended abdomen, inactive     | 18               |      |      |       |       |       |       |       |       |       |      |
| Behaviour (Level of activity)                           | Normal                                       | 0                |      |      |       |       |       |       |       |       |       |      |
|                                                         | Slightly reduced                             | 1                |      |      |       |       |       |       |       |       |       |      |
|                                                         | Moderately reduced                           | 3                |      |      |       |       |       |       |       |       |       |      |
|                                                         | Distressed behaviour due to growing tumour   | 3                |      |      |       |       |       |       |       |       |       |      |
|                                                         | Obviously reduced                            | 5                |      |      |       |       |       |       |       |       |       |      |
|                                                         | Isolated, inactive, lethargic                | 18               |      |      |       |       |       |       |       |       |       |      |
| Body weight (Compared to body weight before experiment) | Body weight:                                 |                  | 21.9 | 22.2 | 21.7  | 21.6  | 22.5  | 23    | 22.8  | 22.8  | 21.7  | 21.5 |
|                                                         | No loss                                      | 0                |      |      |       |       |       |       |       |       |       |      |
|                                                         | Loss < 5%                                    | 1                |      |      |       |       |       |       |       |       |       |      |
|                                                         | Loss 5-9%                                    | 3                |      |      |       |       |       |       |       |       |       |      |
|                                                         | Loss 10-14%                                  | 5                |      |      |       |       |       |       |       |       |       |      |
|                                                         | Loss ≥ 15%                                   | 18               |      |      |       |       |       |       |       |       |       |      |
| Clinical signs (Infection, bleeding, discoloration)     | Normal                                       | 0                |      |      |       |       |       |       |       |       |       |      |
|                                                         | Minor irritation around surgical wound       | 1                |      |      |       |       |       |       |       |       |       |      |
|                                                         | Moderate irritation/infected surgical wound  | 3                |      |      |       |       |       |       |       |       |       |      |
|                                                         | Infected/open surgical wound                 | 4 *              |      |      |       |       |       |       |       |       |       |      |
|                                                         | Tumour > 1.0 cm in diameter                  | 10               |      |      |       |       |       |       |       |       |       |      |
|                                                         | Tumour > 1.5 cm in diameter                  | 18               |      |      |       |       |       |       |       |       |       |      |
|                                                         | Ulcerous tumour                              | 18               |      |      |       |       |       |       |       |       |       |      |
|                                                         | Total:                                       |                  |      |      |       |       |       |       |       |       |       |      |
| Comments, treatments etc:                               |                                              |                  |      |      |       |       |       |       |       |       |       |      |

Supplementary figure 1-12-4. Pictures of scoresheets

NTNU Score sheet FOTS: Avdeling for komparativ medisin (AKM) Responsible researcher: Pettersen Animal ID: 1 (P3) 12

Xenograft 1/4-19

| Parameter                                               | State                                        | Assessment scale | Date    | Date | Date  | Date  | Date  | Date  | Date  | Date  | Date  | Date | Date |
|---------------------------------------------------------|----------------------------------------------|------------------|---------|------|-------|-------|-------|-------|-------|-------|-------|------|------|
| General appearance                                      | Normal                                       | 0                | 4/11    | 6/11 | 12/11 | 13/11 | 15/11 | 18/11 | 20/11 | 25/11 | 27/11 | 2/12 | 5/12 |
|                                                         | Reduced grooming                             | 1                |         |      |       |       |       |       |       |       |       |      |      |
|                                                         | Minor distention of abdomen, rough hair coat | 3                |         |      |       |       |       |       |       |       |       |      |      |
|                                                         | Hunchback or distended abdomen, inactive     | 18               |         |      |       |       |       |       |       |       |       |      |      |
| Behaviour (Level of activity)                           | Normal                                       | 0                |         |      |       |       |       |       |       |       |       |      |      |
|                                                         | Slightly reduced                             | 1                |         |      |       |       |       |       |       |       |       |      |      |
|                                                         | Moderately reduced                           | 3                |         |      |       |       |       |       |       |       |       |      |      |
|                                                         | Distressed behaviour due to growing tumour   | 3                |         |      |       |       |       |       |       |       |       |      |      |
|                                                         | Obviously reduced                            | 5                |         |      |       |       |       |       |       |       |       |      |      |
| Body weight (Compared to body weight before experiment) | Isolated, inactive, lethargic                | 18               |         |      |       |       |       |       |       |       |       |      |      |
|                                                         | Body weight:                                 |                  | 21,9    | 23,2 | 23,4  |       | 22,1  | 17,8  | 20,9  | 22,2  | 25,7  | 27,1 | 20,6 |
|                                                         | No loss                                      | 0                |         |      |       |       |       |       |       |       |       |      |      |
|                                                         | Loss < 5%                                    | 1                |         |      |       |       |       |       |       |       |       |      |      |
|                                                         | Loss 5-9%                                    | 3                |         |      |       |       |       |       |       |       |       |      |      |
| Clinical signs (Infection, bleeding, discoloration)     | Loss 10-14%                                  | 5                |         |      |       |       |       |       |       |       |       |      |      |
|                                                         | Loss > 15%                                   | 18               |         |      |       |       |       |       |       |       |       |      |      |
|                                                         | Normal                                       | 0                |         |      |       |       |       |       |       |       |       |      |      |
|                                                         | Minor irritation around surgical wound       | 1                | 3,5x3,5 | 3,7x | 3,7   | 3,5   | 3,5   | 3,5   | 3,5   | 3,5   | 3,5   | 3,5  | 3,5  |
|                                                         | Moderate irritation/infected surgical wound  | 3                |         |      |       |       |       |       |       |       |       |      |      |
|                                                         | Infected/open surgical wound                 | 4 *              |         |      |       |       |       |       |       |       |       |      |      |
| Total:                                                  | Tumour > 1,0 cm in diameter                  | 10               |         |      |       |       |       |       |       |       |       |      |      |
|                                                         | Tumour > 1,5 cm in diameter                  | 18               |         |      |       |       |       |       |       |       |       |      |      |
|                                                         | Ulcerous tumour                              | 18               |         |      |       |       |       |       |       |       |       |      |      |
|                                                         | Comments, treatments etc:                    |                  |         |      |       |       |       |       |       |       |       |      |      |

0-3: Normal  
4-9: Pay attention to health state and consider treatment  
10-13: Pay close attention to health state, consider treatment or euthanasia  
14-18: Euthanasia \*Start treatment with antibiotics. If no effect within 3 days, euthanize the animal

NTNU Score sheet FOTS: Avdeling for komparativ medisin (AKM) Responsible researcher: Pettersen Animal ID: 1 (P3) 12

Xenograft 1/4-19

| Parameter                                               | State                                        | Assessment scale | Date | Date  | Date  | Date  | Date  | Date  | Date  | Date  | Date  | Date  | Date     |
|---------------------------------------------------------|----------------------------------------------|------------------|------|-------|-------|-------|-------|-------|-------|-------|-------|-------|----------|
| General appearance                                      | Normal                                       | 0                | 9/12 | 11/12 | 13/12 | 16/12 | 18/12 | 20/12 | 24/12 | 26/12 | 30/12 | 31/12 | 6/1/2021 |
|                                                         | Reduced grooming                             | 1                |      |       |       |       |       |       |       |       |       |       |          |
|                                                         | Minor distention of abdomen, rough hair coat | 3                |      |       |       |       |       |       |       |       |       |       |          |
|                                                         | Hunchback or distended abdomen, inactive     | 18               |      |       |       |       |       |       |       |       |       |       |          |
| Behaviour (Level of activity)                           | Normal                                       | 0                |      |       |       |       |       |       |       |       |       |       |          |
|                                                         | Slightly reduced                             | 1                |      |       |       |       |       |       |       |       |       |       |          |
|                                                         | Moderately reduced                           | 3                |      |       |       |       |       |       |       |       |       |       |          |
|                                                         | Distressed behaviour due to growing tumour   | 3                |      |       |       |       |       |       |       |       |       |       |          |
|                                                         | Obviously reduced                            | 5                |      |       |       |       |       |       |       |       |       |       |          |
| Body weight (Compared to body weight before experiment) | Isolated, inactive, lethargic                | 18               |      |       |       |       |       |       |       |       |       |       |          |
|                                                         | Body weight:                                 |                  | 20,6 | 21    | 20,8  | 21,6  | 22,3  | 21,9  | 22,2  | 21,3  | 21,9  | 21,9  | 22,6     |
|                                                         | No loss                                      | 0                |      |       |       |       |       |       |       |       |       |       |          |
|                                                         | Loss < 5%                                    | 1                |      |       |       |       |       |       |       |       |       |       |          |
|                                                         | Loss 5-9%                                    | 3                |      |       |       |       |       |       |       |       |       |       |          |
| Clinical signs (Infection, bleeding, discoloration)     | Loss 10-14%                                  | 5                |      |       |       |       |       |       |       |       |       |       |          |
|                                                         | Loss > 15%                                   | 18               |      |       |       |       |       |       |       |       |       |       |          |
|                                                         | Normal                                       | 0                |      |       |       |       |       |       |       |       |       |       |          |
|                                                         | Minor irritation around surgical wound       | 1                |      |       |       |       |       |       |       |       |       |       |          |
|                                                         | Moderate irritation/infected surgical wound  | 3                |      |       |       |       |       |       |       |       |       |       |          |
|                                                         | Infected/open surgical wound                 | 4 *              |      |       |       |       |       |       |       |       |       |       |          |
| Total:                                                  | Tumour > 1,0 cm in diameter                  | 10               |      |       |       |       |       |       |       |       |       |       |          |
|                                                         | Tumour > 1,5 cm in diameter                  | 18               |      |       |       |       |       |       |       |       |       |       |          |
|                                                         | Ulcerous tumour                              | 18               |      |       |       |       |       |       |       |       |       |       |          |
|                                                         | Comments, treatments etc:                    |                  |      |       |       |       |       |       |       |       |       |       |          |

0-3: Normal  
4-9: Pay attention to health state and consider treatment  
10-13: Pay close attention to health state, consider treatment or euthanasia  
14-18: Euthanasia \*Start treatment with antibiotics. If no effect within 3 days, euthanize the animal

NTNU Score sheet FOTS: Avdeling for komparativ medisin (AKM) Responsible researcher: Pettersen Animal ID: 1 (P3) 12

Xenograft 1/4-19

| Parameter                                               | State                                        | Assessment scale | Date | Date | Date | Date | Date | Date | Date | Date | Date | Date | Date |
|---------------------------------------------------------|----------------------------------------------|------------------|------|------|------|------|------|------|------|------|------|------|------|
| General appearance                                      | Normal                                       | 0                | 13/1 | 15/1 | 17/1 | 20/1 | 22/1 | 24/1 | 27/1 | 27/1 | 30/1 | 3/2  | 5/2  |
|                                                         | Reduced grooming                             | 1                |      |      |      |      |      |      |      |      |      |      |      |
|                                                         | Minor distention of abdomen, rough hair coat | 3                |      |      |      |      |      |      |      |      |      |      |      |
|                                                         | Hunchback or distended abdomen, inactive     | 18               |      |      |      |      |      |      |      |      |      |      |      |
| Behaviour (Level of activity)                           | Normal                                       | 0                |      |      |      |      |      |      |      |      |      |      |      |
|                                                         | Slightly reduced                             | 1                |      |      |      |      |      |      |      |      |      |      |      |
|                                                         | Moderately reduced                           | 3                |      |      |      |      |      |      |      |      |      |      |      |
|                                                         | Distressed behaviour due to growing tumour   | 3                |      |      |      |      |      |      |      |      |      |      |      |
|                                                         | Obviously reduced                            | 5                |      |      |      |      |      |      |      |      |      |      |      |
| Body weight (Compared to body weight before experiment) | Isolated, inactive, lethargic                | 18               |      |      |      |      |      |      |      |      |      |      |      |
|                                                         | Body weight:                                 |                  | 22,4 | 22   | 22,3 | 23   | 23,5 | 23,5 | 21,9 | 22,5 | 22,3 | 21,4 | 22,3 |
|                                                         | No loss                                      | 0                |      |      |      |      |      |      |      |      |      |      |      |
|                                                         | Loss < 5%                                    | 1                |      |      |      |      |      |      |      |      |      |      |      |
|                                                         | Loss 5-9%                                    | 3                |      |      |      |      |      |      |      |      |      |      |      |
| Clinical signs (Infection, bleeding, discoloration)     | Loss 10-14%                                  | 5                |      |      |      |      |      |      |      |      |      |      |      |
|                                                         | Loss > 15%                                   | 18               |      |      |      |      |      |      |      |      |      |      |      |
|                                                         | Normal                                       | 0                |      |      |      |      |      |      |      |      |      |      |      |
|                                                         | Minor irritation around surgical wound       | 1                |      |      |      |      |      |      |      |      |      |      |      |
|                                                         | Moderate irritation/infected surgical wound  | 3                |      |      |      |      |      |      |      |      |      |      |      |
|                                                         | Infected/open surgical wound                 | 4 *              |      |      |      |      |      |      |      |      |      |      |      |
| Total:                                                  | Tumour > 1,0 cm in diameter                  | 10               |      |      |      |      |      |      |      |      |      |      |      |
|                                                         | Tumour > 1,5 cm in diameter                  | 18               |      |      |      |      |      |      |      |      |      |      |      |
|                                                         | Ulcerous tumour                              | 18               |      |      |      |      |      |      |      |      |      |      |      |
|                                                         | Comments, treatments etc:                    |                  |      |      |      |      |      |      |      |      |      |      |      |

0-3: Normal  
4-9: Pay attention to health state and consider treatment  
10-13: Pay close attention to health state, consider treatment or euthanasia  
14-18: Euthanasia \*Start treatment with antibiotics. If no effect within 3 days, euthanize the animal

NTNU Score sheet FOTS: Avdeling for komparativ medisin (AKM) Responsible researcher: Pettersen Animal ID: 1 (P3) 12

Xenograft 1/4-19

| Parameter                                               | State                                        | Assessment scale | Date | Date | Date | Date | Date | Date | Date | Date | Date | Date | Date |
|---------------------------------------------------------|----------------------------------------------|------------------|------|------|------|------|------|------|------|------|------|------|------|
| General appearance                                      | Normal                                       | 0                | 11/2 | 12/2 | 14/2 | 17/2 | 19/2 | 21/2 | 24/2 | 26/2 | 28/2 | 31/2 | 4/3  |
|                                                         | Reduced grooming                             | 1                |      |      |      |      |      |      |      |      |      |      |      |
|                                                         | Minor distention of abdomen, rough hair coat | 3                |      |      |      |      |      |      |      |      |      |      |      |
|                                                         | Hunchback or distended abdomen, inactive     | 18               |      |      |      |      |      |      |      |      |      |      |      |
| Behaviour (Level of activity)                           | Normal                                       | 0                |      |      |      |      |      |      |      |      |      |      |      |
|                                                         | Slightly reduced                             | 1                |      |      |      |      |      |      |      |      |      |      |      |
|                                                         | Moderately reduced                           | 3                |      |      |      |      |      |      |      |      |      |      |      |
|                                                         | Distressed behaviour due to growing tumour   | 3                |      |      |      |      |      |      |      |      |      |      |      |
|                                                         | Obviously reduced                            | 5                |      |      |      |      |      |      |      |      |      |      |      |
| Body weight (Compared to body weight before experiment) | Isolated, inactive, lethargic                | 18               |      |      |      |      |      |      |      |      |      |      |      |
|                                                         | Body weight:                                 |                  | 23,2 | 22,3 | 21,4 | 22   | 21,7 | 21,3 | 21,7 | 22,1 | 22   | 22,8 | 22,5 |
|                                                         | No loss                                      | 0                |      |      |      |      |      |      |      |      |      |      |      |
|                                                         | Loss < 5%                                    | 1                |      |      |      |      |      |      |      |      |      |      |      |
|                                                         | Loss 5-9%                                    | 3                |      |      |      |      |      |      |      |      |      |      |      |
| Clinical signs (Infection, bleeding, discoloration)     | Loss 10-14%                                  | 5                |      |      |      |      |      |      |      |      |      |      |      |
|                                                         | Loss > 15%                                   | 18               |      |      |      |      |      |      |      |      |      |      |      |
|                                                         | Normal                                       | 0                |      |      |      |      |      |      |      |      |      |      |      |
|                                                         | Minor irritation around surgical wound       | 1                |      |      |      |      |      |      |      |      |      |      |      |
|                                                         | Moderate irritation/infected surgical wound  | 3                |      |      |      |      |      |      |      |      |      |      |      |
|                                                         | Infected/open surgical wound                 | 4 *              |      |      |      |      |      |      |      |      |      |      |      |
| Total:                                                  | Tumour > 1,0 cm in diameter                  | 10               |      |      |      |      |      |      |      |      |      |      |      |
|                                                         | Tumour > 1,5 cm in diameter                  | 18               |      |      |      |      |      |      |      |      |      |      |      |
|                                                         | Ulcerous tumour                              | 18               |      |      |      |      |      |      |      |      |      |      |      |
|                                                         | Comments, treatments etc:                    |                  |      |      |      |      |      |      |      |      |      |      |      |

0-3: Normal  
4-9: Pay attention to health state and consider treatment  
10-13: Pay close attention to health state, consider treatment or euthanasia  
14-18: Euthanasia \*Start treatment with antibiotics. If no effect within 3 days, euthanize the animal

Weight curve

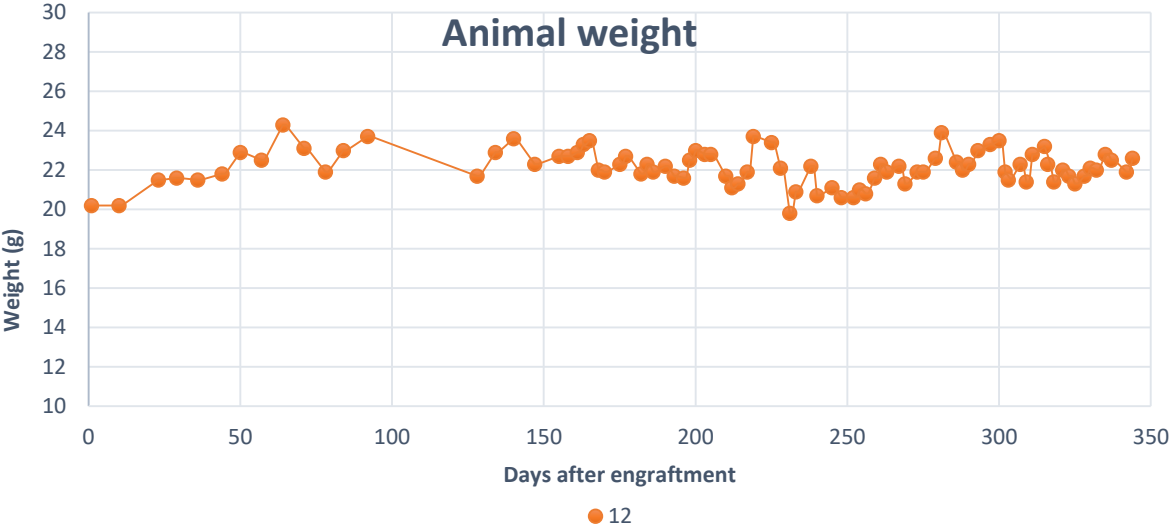

Xenograft growth curve

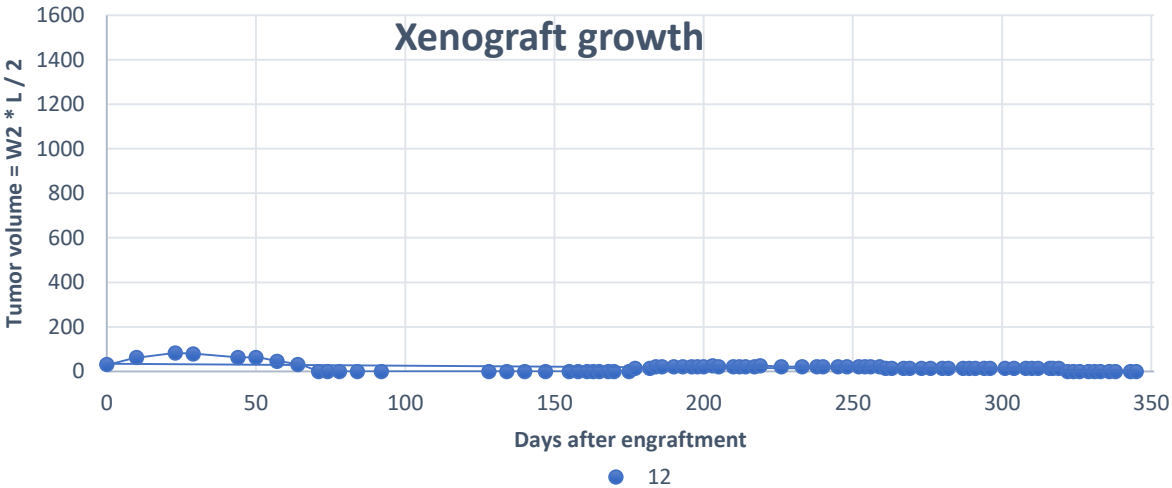



## Supplementary figure 1-12-6. Histology pictures

M12X – tissue spot at surgery location at euthanization (thought to be remainings of engrafted tumor material)

- Stained with hematoxylin, eosine and saphron (HES)
- Probably not xenograft tissue
- No tumor cells found
- Muscle cells, fat, mucus, connective tissue
- Traces of plant cells outside but also inside tissue? Possibly paper leftovers.

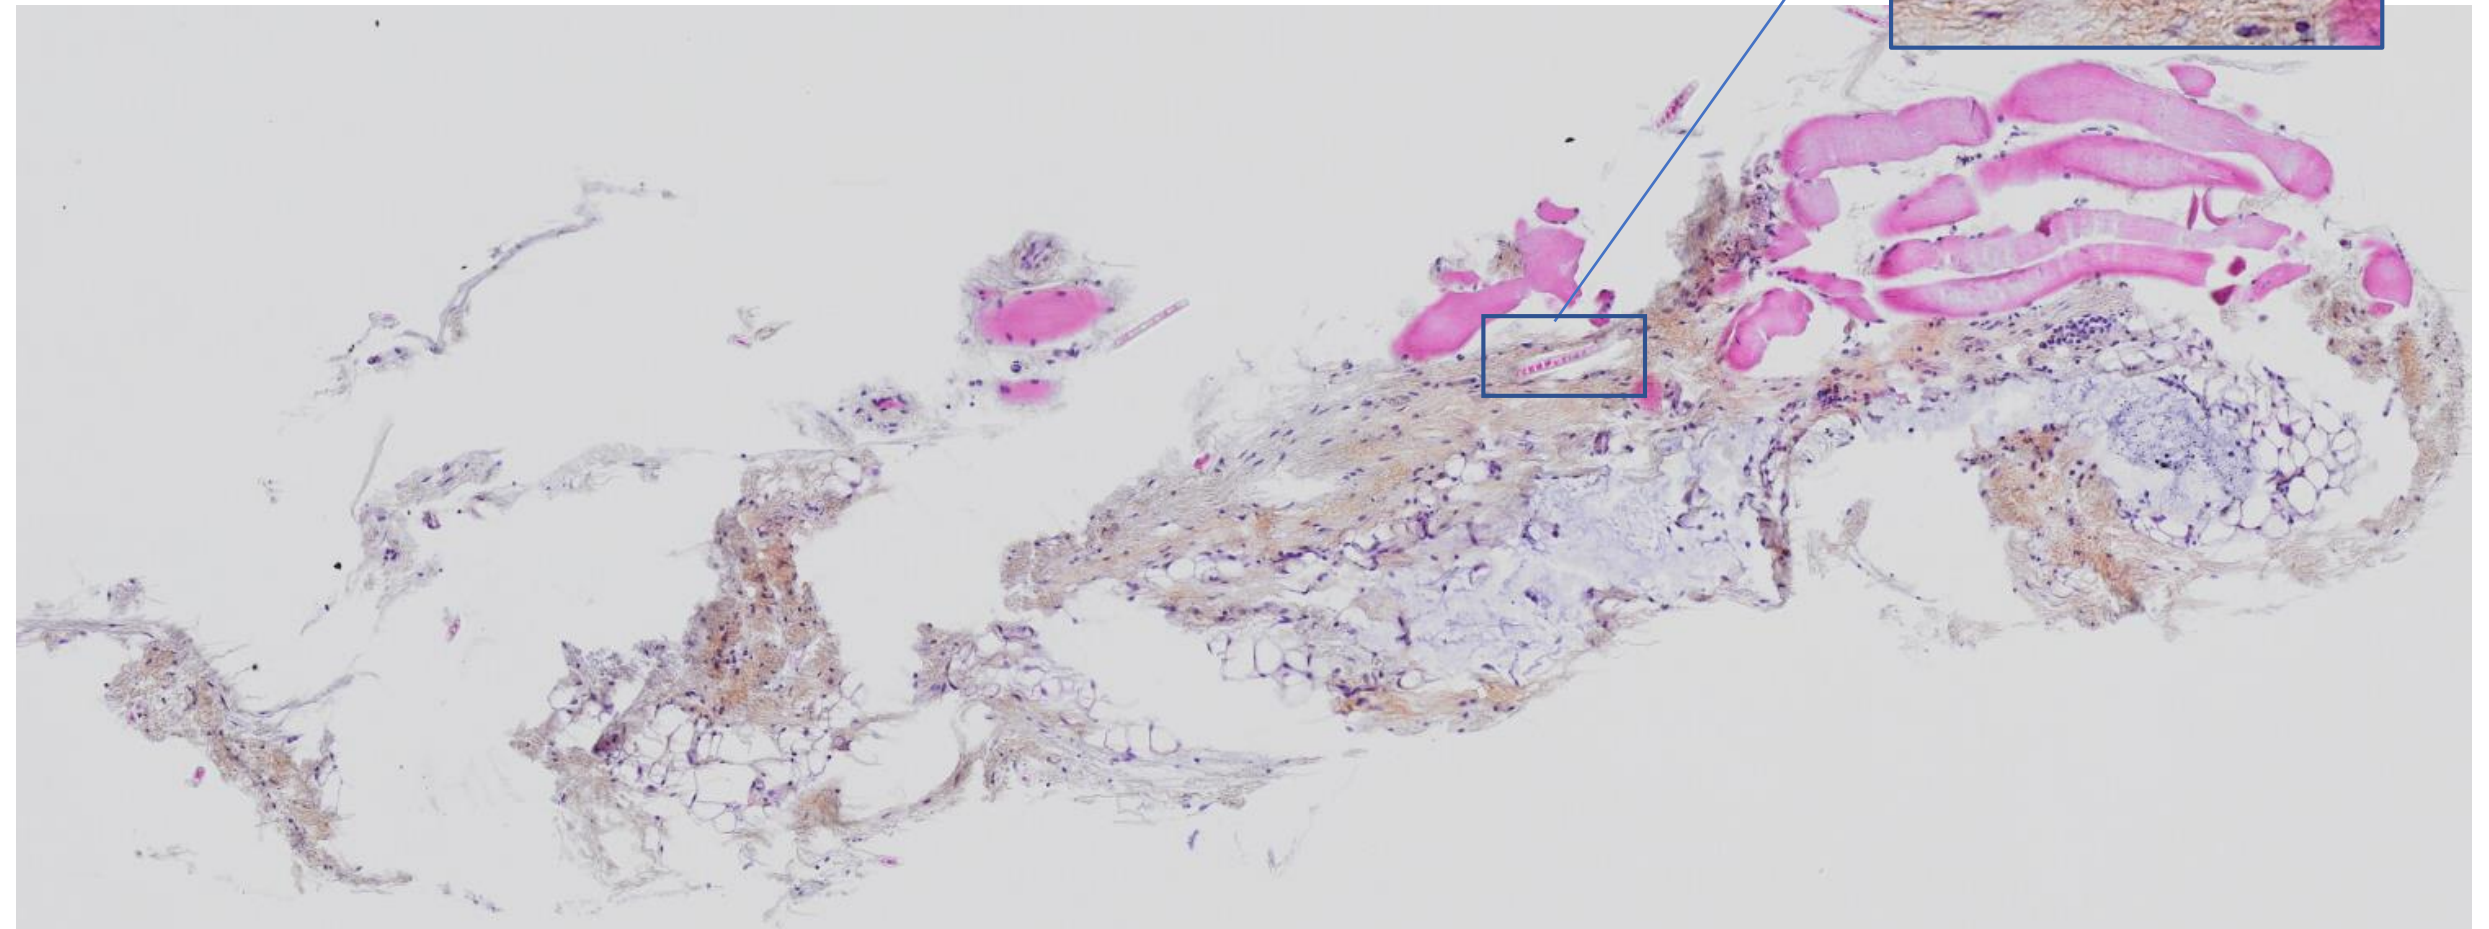

## Supplementary figure 1-12-6. Histology pictures

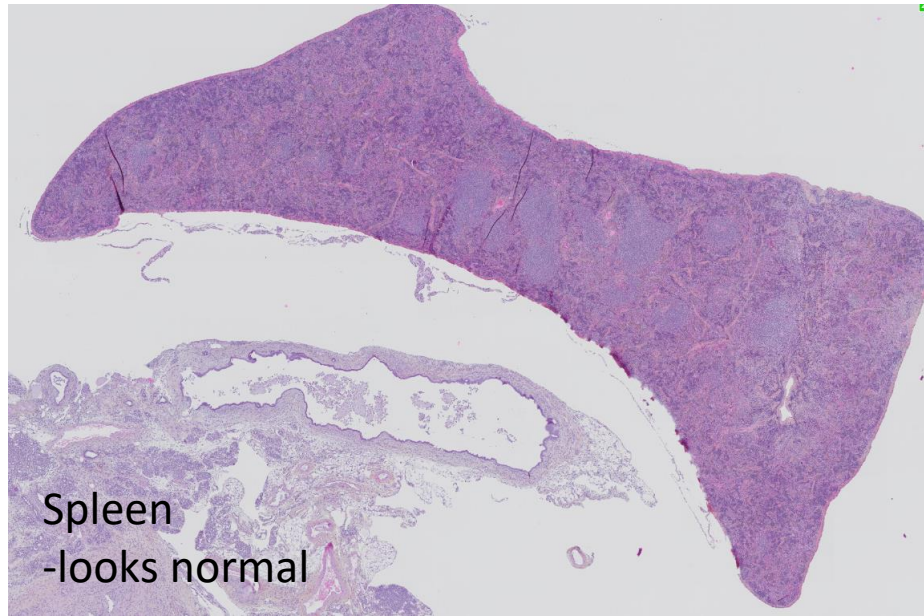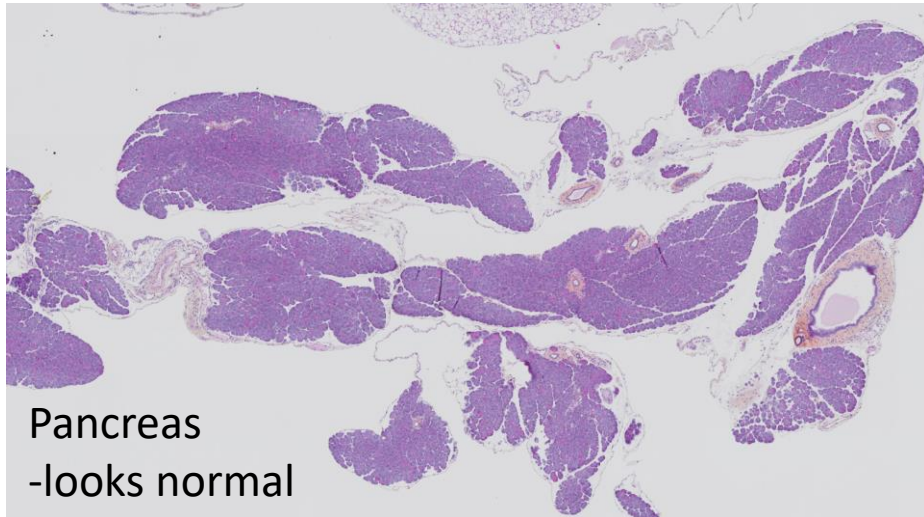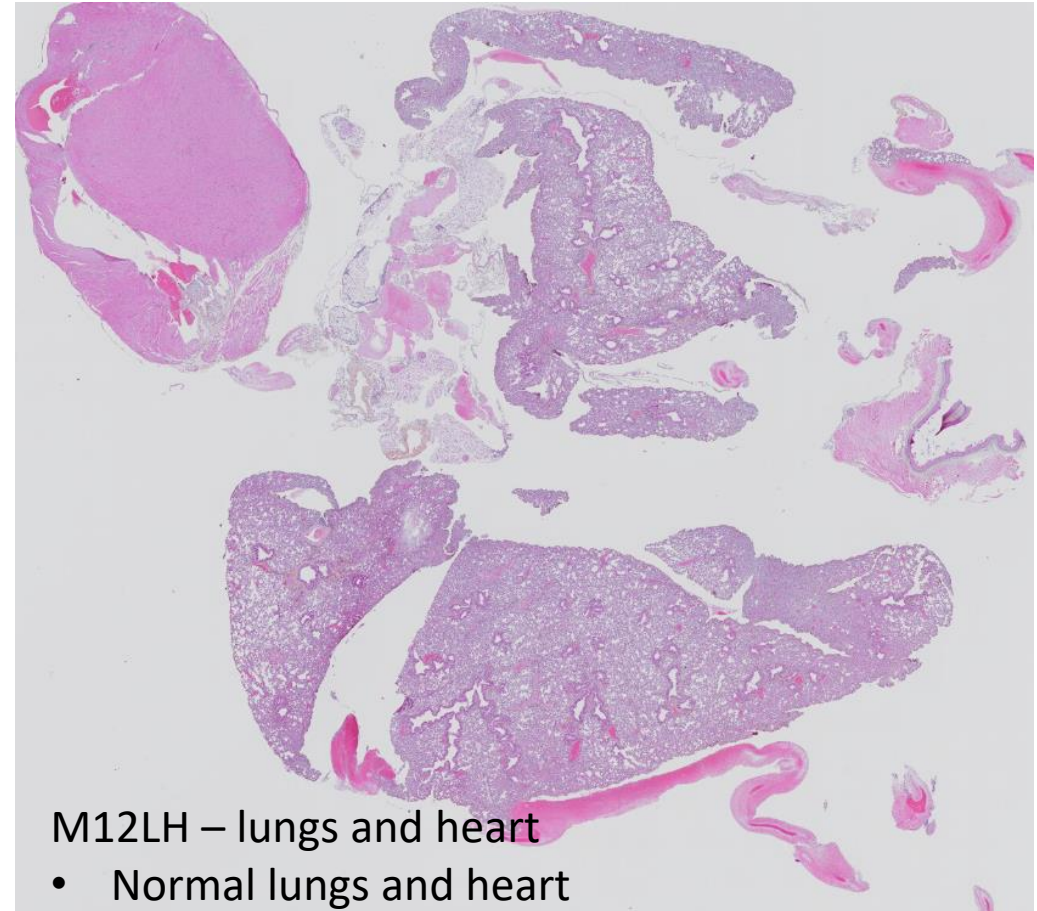



## Mouse 15

- Surgery date: 01.04.18
  - Age (weeks) 11
  - Weight (g) 18.5
  - Tumor fragment P3-1B
  - Ear marks 2

| MUS                                     |                       |        | FOTS         |
|-----------------------------------------|-----------------------|--------|--------------|
| Kjønn                                   | ♀                     | Stamme | C1EA NOG     |
| Alder/vekt                              | 6u                    | Antall | 1            |
| Bruker                                  | Caroline H. Pettersen |        | Ankomst dato |
| 15                                      |                       |        | 25/2-19      |
| 01.04.18 Satt inn xenograft P3-1B Mus 2 |                       |        |              |

**Supplementary figure 1-15-1.** Pictures from the engraftment day

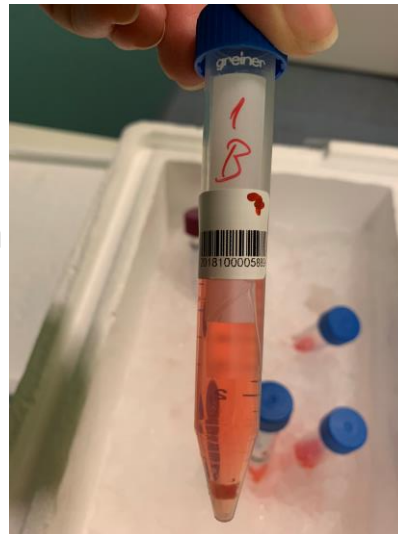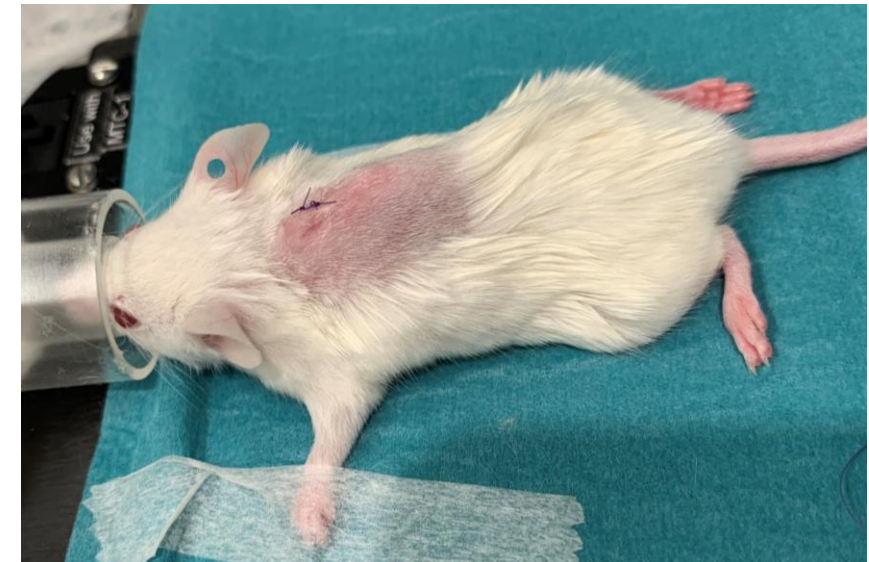

**Supplementary figure 1-15-2.** Pictures from follow up(14.06.19) and score sheets

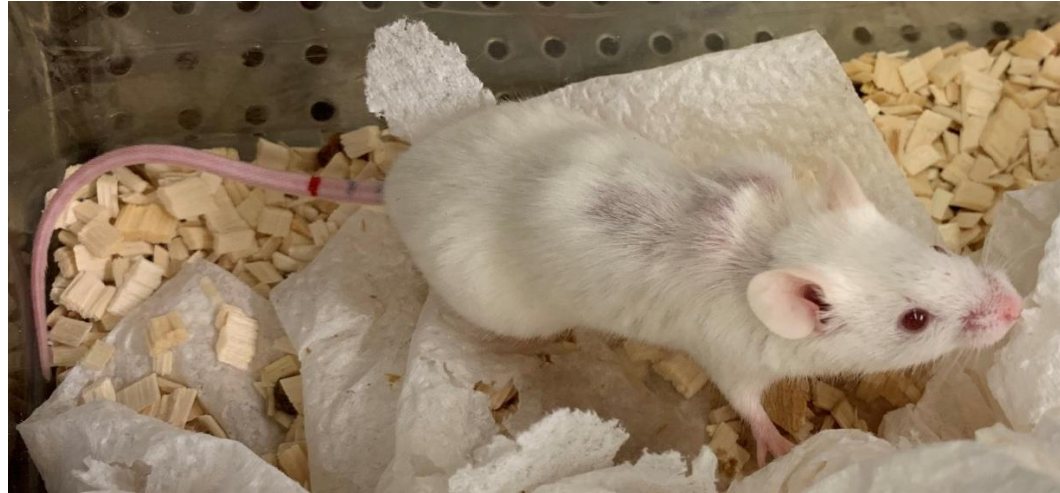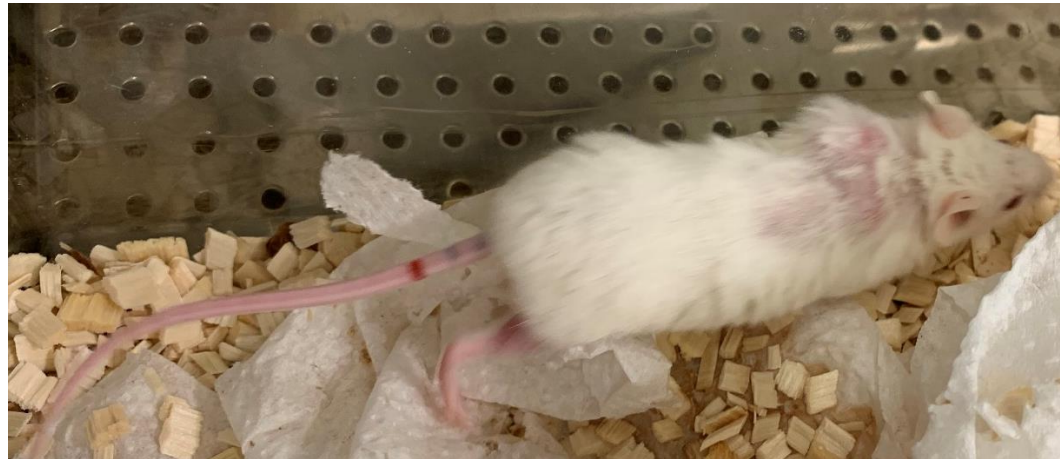

# Blood sample and treatment

- Blood samples before and after treatment
  - Before: Vena Saphena
  - After: heart
- Placebo treatment

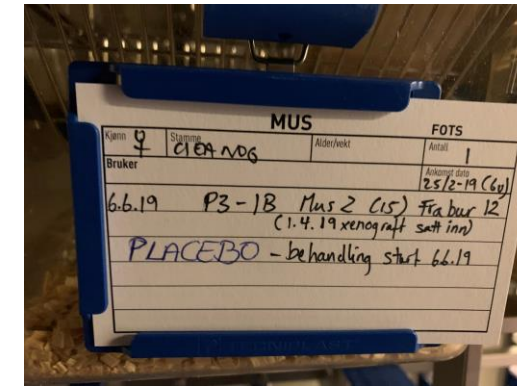

**Supplementary figure 1-15-3.** List over treatment with placebo. Numbers are weight in grams before and after provided to the mice.

PLACEBO BUR 16

Vekt m/ drikke og tut

Antall gram per flaske før og etter 7 timer

|            | Weight (g) |       | ID mus | ID mus | ID mus | ID mus | ID mus | ID mus |
|------------|------------|-------|--------|--------|--------|--------|--------|--------|
|            | Start      | End   |        |        |        |        |        |        |
|            | 08.00      | 15.00 |        |        |        |        |        |        |
| 05.06.2019 |            |       |        |        |        |        |        |        |
| 06.06.2019 | 131,6      | 126,3 | 15     |        |        |        |        |        |
| 07.06.2019 | 129,0      | 122,6 |        |        |        |        |        |        |
| 10.06.2019 | —          |       |        |        |        |        |        |        |
| 11.06.2019 | 136,4      | 127,2 |        | 20     |        |        |        |        |
| 12.06.2019 | 134,3      | 124,4 |        |        |        |        |        |        |
| 13.06.2019 | 133,2      | 121,2 |        |        |        |        |        |        |
| 14.06.2019 | 132,4      | 121,0 |        |        |        |        |        |        |
| 17.06.2019 | 135,1      | 125,1 |        |        |        |        |        |        |
| 18.06.2019 | 133,6      | 125,2 |        |        |        |        |        |        |
| 19.06.2019 | 135,0      | 119,2 |        |        |        |        |        |        |
| 20.06.2019 | 134,2      | 116,8 |        |        |        |        |        |        |
| 21.06.2019 | 133,9      | 121,1 |        |        |        |        |        |        |
| 24.06.2019 | 133,2      | 121,6 |        |        |        |        |        |        |
| 25.06.2019 | 131,1      |       |        |        |        |        |        |        |
| 26.06.2019 |            |       |        |        |        |        |        |        |
| 27.06.2019 |            |       |        |        |        |        |        |        |
| 28.06.2019 |            |       |        |        |        |        |        |        |
| 01.07.2019 |            |       |        |        |        |        |        |        |

Start muggsopp i buret!



## Supplementary figure 1-15-4. Pictures from euthanization (25.06.19)

- Necroscopy
  - Xenograft size 15.5 x 10
  - Blood sample (blood card and plasma)
  - Tumor tissue for
    - Histology
    - RNA isolation
    - Protein isolation

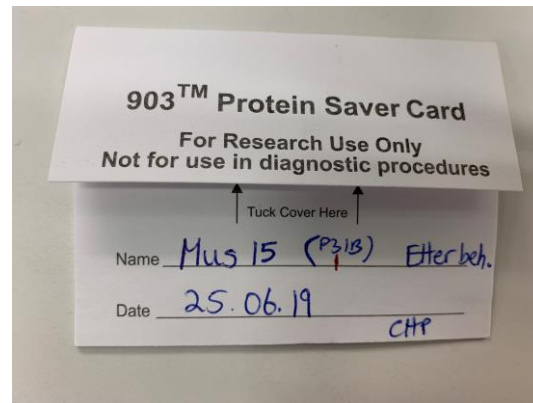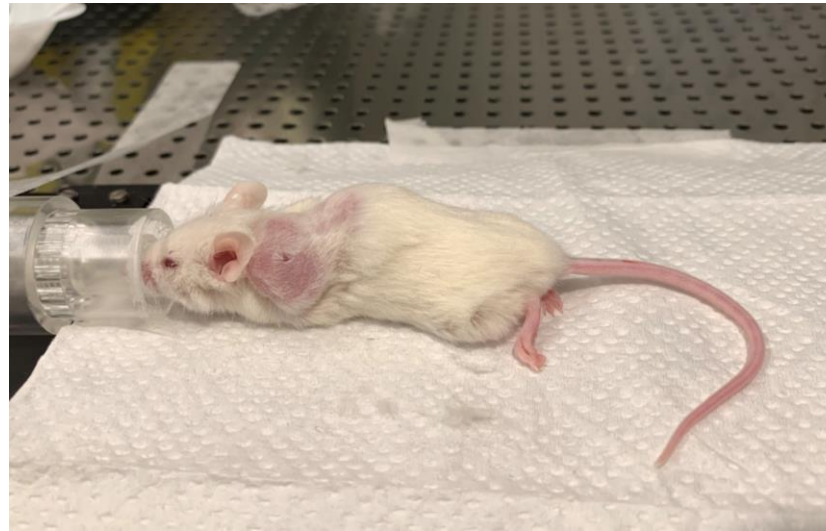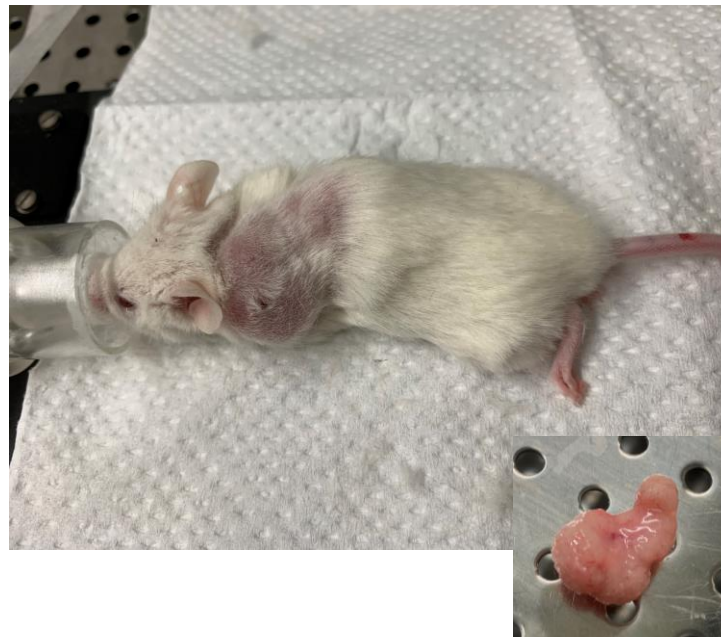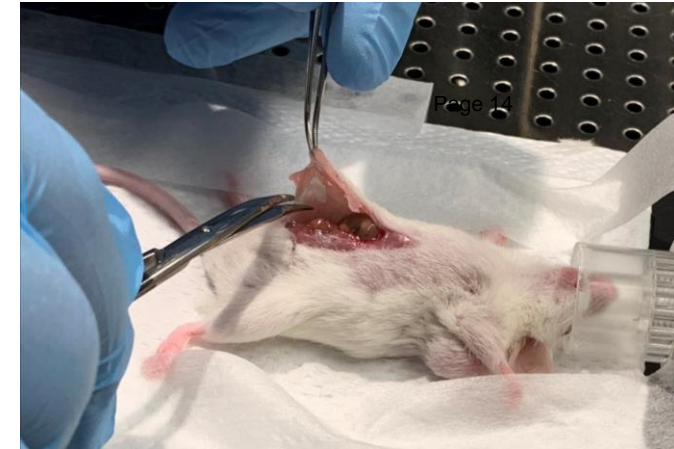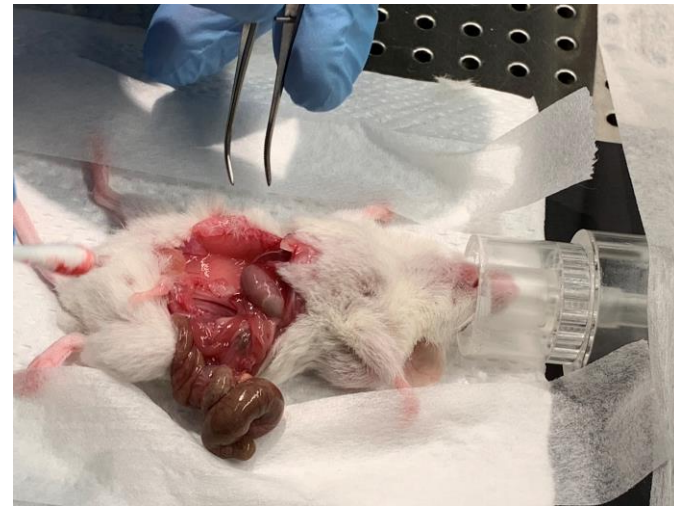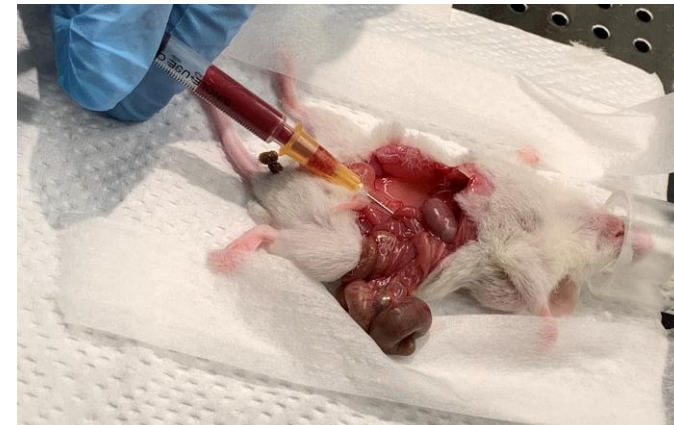

Supplementary figure 1-15-5. Pictures of score sheets

NTNU

Score sheet FOTS:

Avdeling for komparativ medisin (AKM)

Responsible researcher:

Animal ID: Xenograft 14-1 2 (P3) 15

| Parameter                                               | State                                        | Assessment scale | Date                                                                                                                                                                                                                                                                                                                                                                                                                                                                                                                                                                            | Date | Date | Date | Date | Date  | Date   | Date | Date    | Date | Date   |  |  |
|---------------------------------------------------------|----------------------------------------------|------------------|---------------------------------------------------------------------------------------------------------------------------------------------------------------------------------------------------------------------------------------------------------------------------------------------------------------------------------------------------------------------------------------------------------------------------------------------------------------------------------------------------------------------------------------------------------------------------------|------|------|------|------|-------|--------|------|---------|------|--------|--|--|
| General appearance                                      | Normal                                       | 0                | 2.4.19                                                                                                                                                                                                                                                                                                                                                                                                                                                                                                                                                                          | 3.4  | 5.4  | 11.4 | 24.4 | 30.4  | 7/5/19 | 15/5 | 21/5/19 | 28/5 | 4/6.19 |  |  |
|                                                         | Reduced grooming                             | 1                |                                                                                                                                                                                                                                                                                                                                                                                                                                                                                                                                                                                 |      | 0    |      | 6    |       | 6      | 6    | 6       | 0    | 0      |  |  |
|                                                         | Minor distention of abdomen, rough hair coat | 3                |                                                                                                                                                                                                                                                                                                                                                                                                                                                                                                                                                                                 |      |      | 6    |      |       |        |      |         |      |        |  |  |
|                                                         | Hunchback or distended abdomen, inactive     | 18               |                                                                                                                                                                                                                                                                                                                                                                                                                                                                                                                                                                                 |      |      |      |      |       |        |      |         |      |        |  |  |
| Behaviour (Level of activity)                           | Normal                                       | 0                | 0                                                                                                                                                                                                                                                                                                                                                                                                                                                                                                                                                                               |      | 0    | 6    | 6    |       | 0      | 0    | 0       | 0    | 0      |  |  |
|                                                         | Slightly reduced                             | 1                |                                                                                                                                                                                                                                                                                                                                                                                                                                                                                                                                                                                 |      |      |      |      |       |        |      |         |      |        |  |  |
|                                                         | Moderately reduced                           | 3                |                                                                                                                                                                                                                                                                                                                                                                                                                                                                                                                                                                                 |      |      |      |      |       |        |      |         |      |        |  |  |
|                                                         | Distressed behaviour due to growing tumour   | 3                |                                                                                                                                                                                                                                                                                                                                                                                                                                                                                                                                                                                 |      |      |      |      |       |        |      |         |      |        |  |  |
|                                                         | Obviously reduced                            | 5                |                                                                                                                                                                                                                                                                                                                                                                                                                                                                                                                                                                                 |      |      |      |      |       |        |      |         |      |        |  |  |
|                                                         | Isolated, inactive, lethargic                | 18               |                                                                                                                                                                                                                                                                                                                                                                                                                                                                                                                                                                                 |      |      |      |      |       |        |      |         |      |        |  |  |
| Body weight (Compared to body weight before experiment) | Body weight:                                 |                  | 18.7                                                                                                                                                                                                                                                                                                                                                                                                                                                                                                                                                                            |      |      | 18.5 | 20.2 | 19.67 | 21.6   | 20.5 | 20.7    | 20.5 | 20.6   |  |  |
|                                                         | No loss                                      | 0                |                                                                                                                                                                                                                                                                                                                                                                                                                                                                                                                                                                                 |      |      | 0    | 6    |       | 6      | 0    | 0       | 0    |        |  |  |
|                                                         | Loss < 5%                                    | 1                |                                                                                                                                                                                                                                                                                                                                                                                                                                                                                                                                                                                 |      |      |      |      |       |        |      |         |      |        |  |  |
|                                                         | Loss 5-9%                                    | 3                |                                                                                                                                                                                                                                                                                                                                                                                                                                                                                                                                                                                 |      |      |      |      |       |        |      |         |      |        |  |  |
|                                                         | Loss 10-14%                                  | 5                |                                                                                                                                                                                                                                                                                                                                                                                                                                                                                                                                                                                 |      |      |      |      |       |        |      |         |      |        |  |  |
|                                                         | Loss ≥ 15%                                   | 18               |                                                                                                                                                                                                                                                                                                                                                                                                                                                                                                                                                                                 |      |      |      |      |       |        |      |         |      |        |  |  |
| Clinical signs (Infection, bleeding, discoloration)     | Normal                                       | 0                | 0                                                                                                                                                                                                                                                                                                                                                                                                                                                                                                                                                                               |      | 1    |      |      |       |        |      |         |      | 6.5    |  |  |
|                                                         | Minor irritation around surgical wound       | 1                |                                                                                                                                                                                                                                                                                                                                                                                                                                                                                                                                                                                 |      |      |      |      |       |        |      |         |      | 8.5    |  |  |
|                                                         | Moderate irritation/infected surgical wound  | 3                |                                                                                                                                                                                                                                                                                                                                                                                                                                                                                                                                                                                 |      |      |      |      |       |        |      |         |      |        |  |  |
|                                                         | Infected/open surgical wound                 | 4*               |                                                                                                                                                                                                                                                                                                                                                                                                                                                                                                                                                                                 |      |      |      |      |       |        |      |         |      |        |  |  |
|                                                         | Tumour > 1.0 cm in diameter                  | 10               |                                                                                                                                                                                                                                                                                                                                                                                                                                                                                                                                                                                 |      |      |      |      |       |        |      |         |      |        |  |  |
|                                                         | Tumour > 1.5 cm in diameter                  | 18               |                                                                                                                                                                                                                                                                                                                                                                                                                                                                                                                                                                                 |      |      |      |      |       |        |      |         |      |        |  |  |
|                                                         | Ulcerous tumour                              | 18               |                                                                                                                                                                                                                                                                                                                                                                                                                                                                                                                                                                                 |      |      |      |      |       |        |      |         |      |        |  |  |
|                                                         | Total:                                       |                  |                                                                                                                                                                                                                                                                                                                                                                                                                                                                                                                                                                                 |      |      |      |      |       |        |      |         |      |        |  |  |
| Comments, treatments etc:                               |                                              |                  | <div>3 operative open for 3d 0.1 lit<br/>Amn: U26</div> <div>5x55<br/>5x55<br/>4x4</div> <div>ser xenograft<br/>7d<br/>met. 3d<br/>ser. 1d<br/>sister ut</div> <div>ca 9x4.5<br/>4.5<br/>6 (lung)<br/>res. over<br/>on lung</div> <div>6.5<br/>8<br/>8.5</div> <div>12.5<br/>9.5<br/>4.5<br/>2.5</div> <div>234/<br/>587</div> <div>mm<sup>3</sup></div> <div>1</div> <div>14<br/>15</div> <div>15.5<br/>17</div> <div>13.5<br/>(9)</div> <div>179.6 mm<sup>3</sup></div> <div>234.8 mm<sup>3</sup></div> <div>or euthanasia<br/>Tect within 3 days, euthanize the animal</div> |      |      |      |      |       |        |      |         |      |        |  |  |

0-3: Normal  
4-9: Pay attention to health state and consider treatment  
10-13: Pay close attention to health state, consider treatment or euthanasia  
14-18: Euthanasia \*Start treatment with antibiotics. If no effect within 3 days, euthanize the animal

$$\frac{(8.5 \cdot 6.5^2)}{2} = 179.6 \text{ mm}^3$$
$$\frac{(6.5 \cdot 8.5^2)}{2} = 234.8 \text{ mm}^3$$

Weight curve

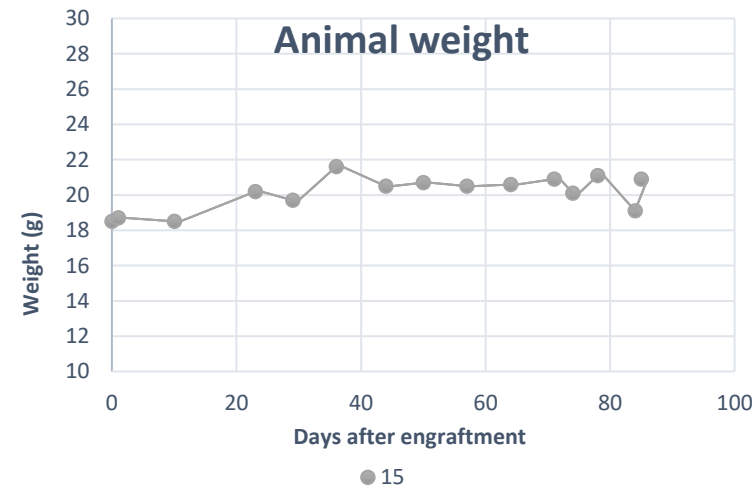

Xenograft growth curve

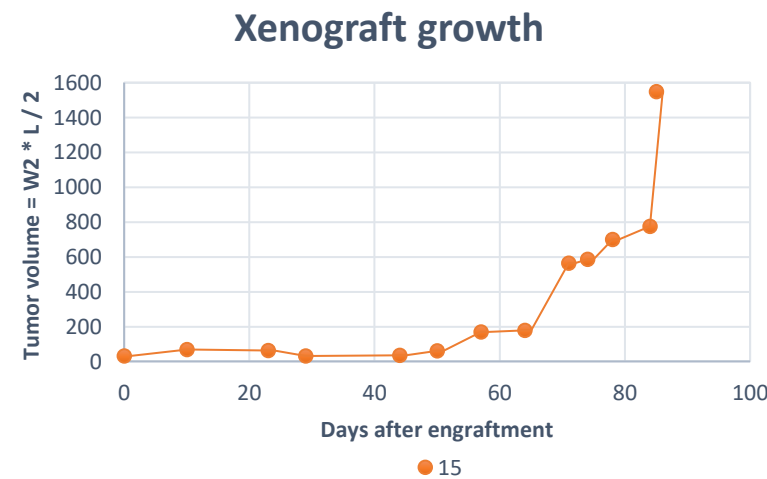



### M15X

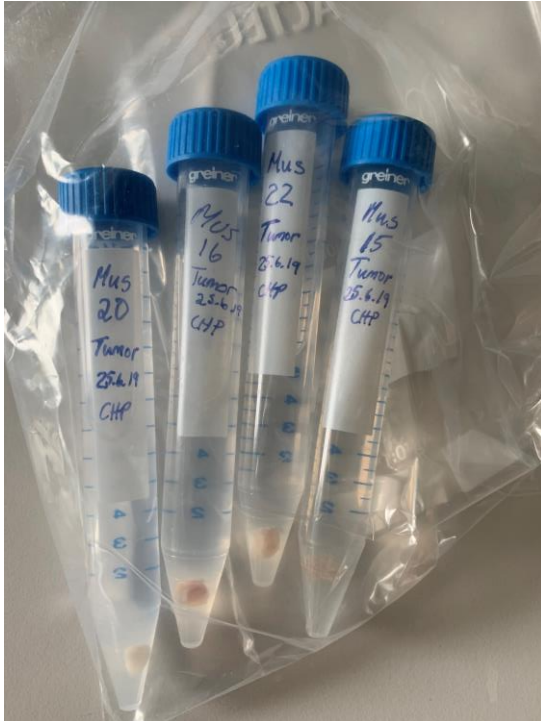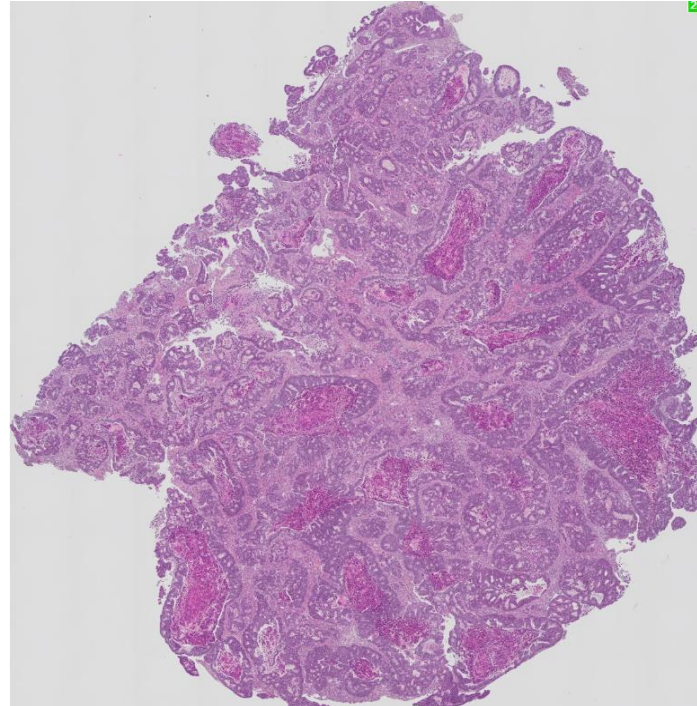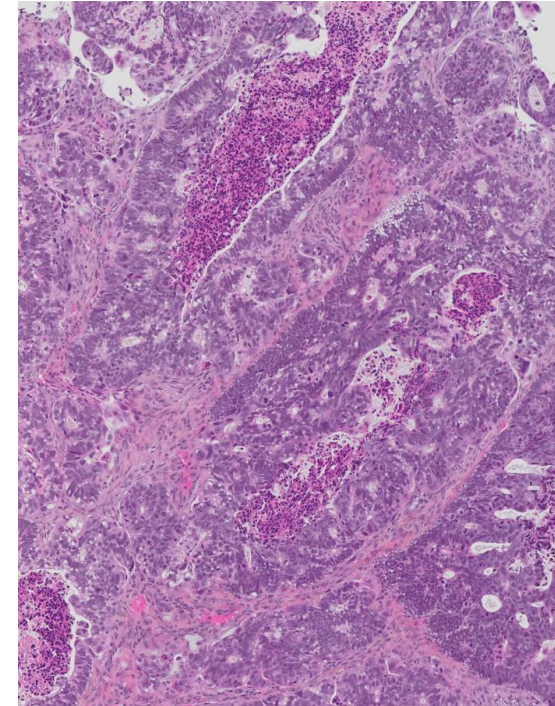

- Typical colorectal adenocarcinoma
- Very similar to the HES staining of patient tumor 3
- Gland forming cells
- Necrotic debris within glandular lumen

## Mouse 16

- Surgery date: 01.04.19
  - Age (weeks) 11
  - Weight (g) 18.2
  - Tumor fragment P3-2A
  - Ear marks 3

| MUS                                    |   |            | FOTS         |
|----------------------------------------|---|------------|--------------|
| Kjønn                                  | ♀ | Stamme     | Antall       |
|                                        |   | CIEA N06   | 1            |
| Bruker                                 |   | Alder/vekt | Ankomst dato |
| Caroline H. Pettersen                  |   | 6 u        | 25/2-19      |
| 16 #                                   |   |            |              |
| 1.4.19 satt inn xenograft P3-2A Musnr3 |   |            |              |
|                                        |   |            |              |
|                                        |   |            |              |
|                                        |   |            |              |

**Supplementary figure 1-16-1.**  
Pictures from the engraftment day

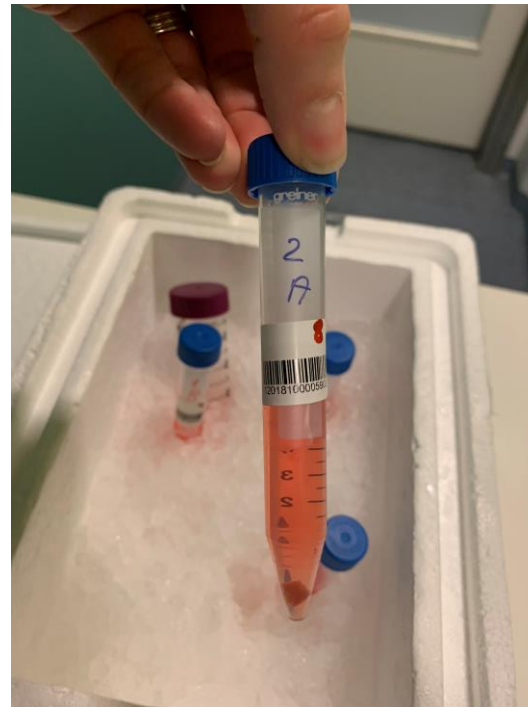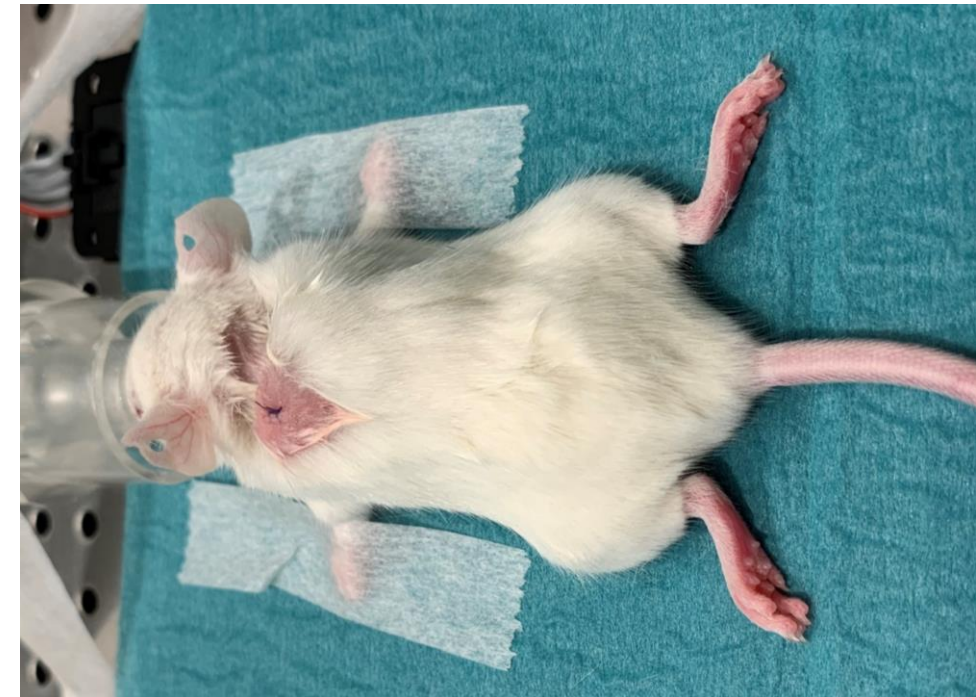



**Supplementary figure 1-16-2.**  
Pictures from follow up (14.06.19)

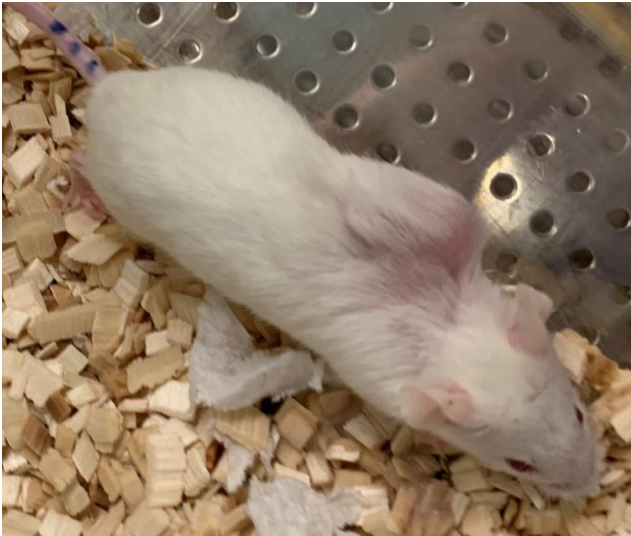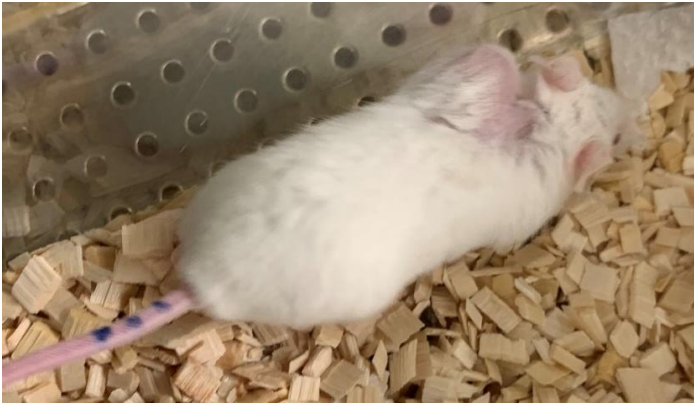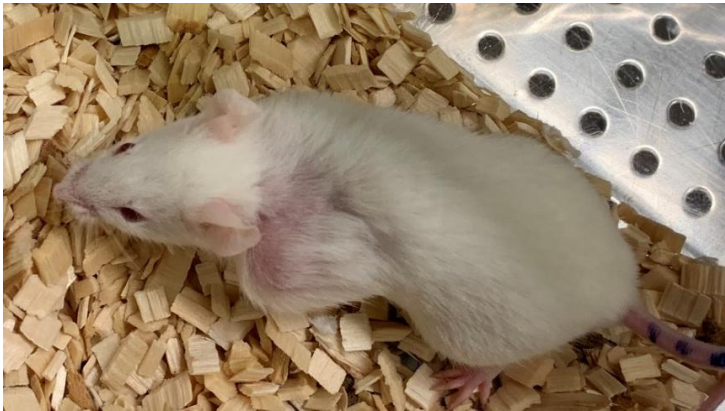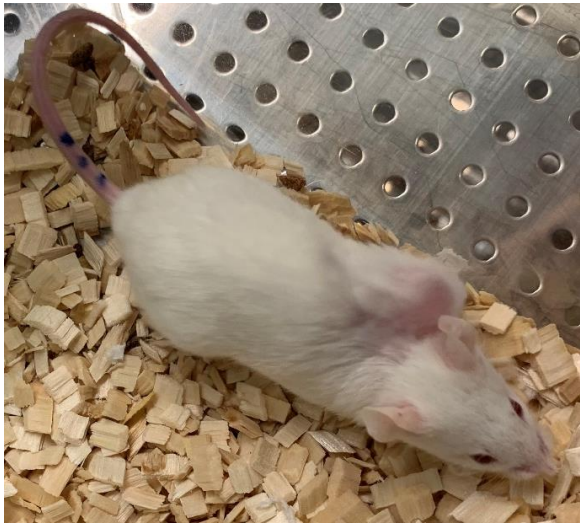

# Blood sample and treatment

- Before: Vena Saphena
- After: heart 04.06.19
- Treatment: Smartfish with fishoil (OMEGA-3)

| MUS                                  |   | FOTS         |          |
|--------------------------------------|---|--------------|----------|
| Kjønn                                | ♀ | Stamme       | CIEA NOS |
| Alder/vekt                           |   | Antall       | 1        |
| Bruker                               |   | Ankomst dato |          |
| 6.6.19 - P3-2A Mus 3 (16) Fra Bur 12 |   | 25/19 (6u)   |          |
| c. 1.4.19 xenograft satt inn         |   |              |          |
| Smartfish - behandling start 6.6.19  |   |              |          |

Smartfish - OMEGA3 - BUR 17

Antall gram per flaske før og etter 7 timer      Vekt m/drikke og tut

|            | Weight (g) |       | ID mus | ID mus | ID mus | ID mus | ID mus | ID mus |
|------------|------------|-------|--------|--------|--------|--------|--------|--------|
|            | Start      | End   |        |        |        |        |        |        |
| 05.06.2019 |            |       |        |        |        |        |        |        |
| 06.06.2019 | 134        | 128,3 | 16     |        |        |        |        |        |
| 07.06.2019 | 133,7      | 126,2 |        |        |        |        |        |        |
| 10.06.2019 |            |       |        |        |        |        |        |        |
| 11.06.2019 | 138,5      | 130   |        | 22     |        |        |        |        |
| 12.06.2019 | 138        | 132,8 |        |        |        |        |        |        |
| 13.06.2019 | 138,5      | 131,9 |        |        |        |        |        |        |
| 14.06.2019 | 142,5      | 134,6 |        |        |        |        |        |        |
| 17.06.2019 | 137,8      | 130,6 |        |        |        |        |        |        |
| 18.06.2019 | 137,4      | 129,0 |        |        |        |        |        |        |
| 19.06.2019 | 139,2      | 132,3 |        |        |        |        |        |        |
| 20.06.2019 | 138,8      | 131,6 |        |        |        |        |        |        |
| 21.06.2019 | 140,6      | 134,7 |        |        |        |        |        |        |
| 24.06.2019 | 139,1      | 130,5 |        |        |        |        |        |        |
| 25.06.2019 | 138,2      |       |        |        |        |        |        |        |
| 26.06.2019 |            |       |        |        |        |        |        |        |
| 27.06.2019 |            |       |        |        |        |        |        |        |
| 28.06.2019 |            |       |        |        |        |        |        |        |
| 01.07.2019 |            |       |        |        |        |        |        |        |
| 02.07.2019 |            |       |        |        |        |        |        |        |
| 03.07.2019 |            |       |        |        |        |        |        |        |

← Papiret kan bryte flaska

Supplementary figure 1-16-3. List with weight registrations of the drinking bottle (with Smartfish Remune Peach drink) before and after provided to the mice



Supplementary figure 1-16-4. Pictures from euthanization

- Xenograft size 13 x 11.5
- Xenograft partly liquid
- Visiable blood vain formation
- Blood sample (blood card and plasma)
- Tumor tissue for
  - Histology
  - RNA isolation
  - Protein isolation

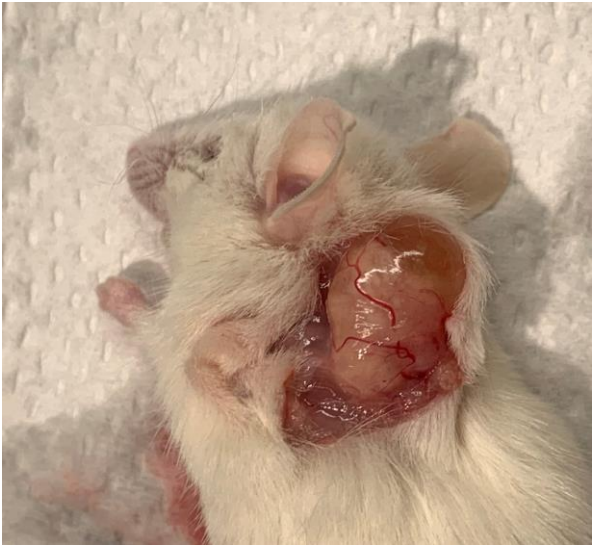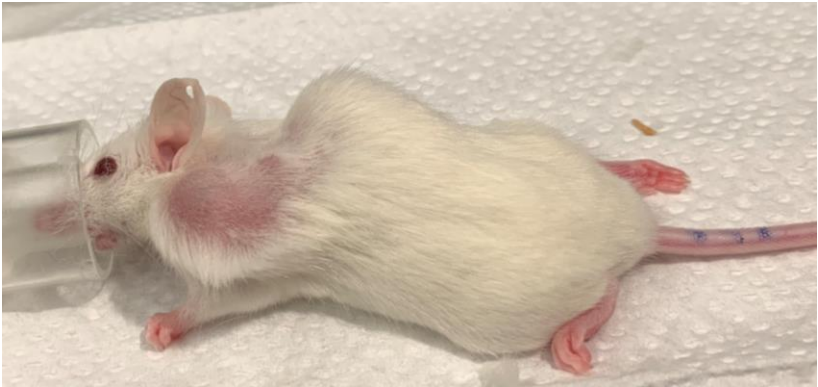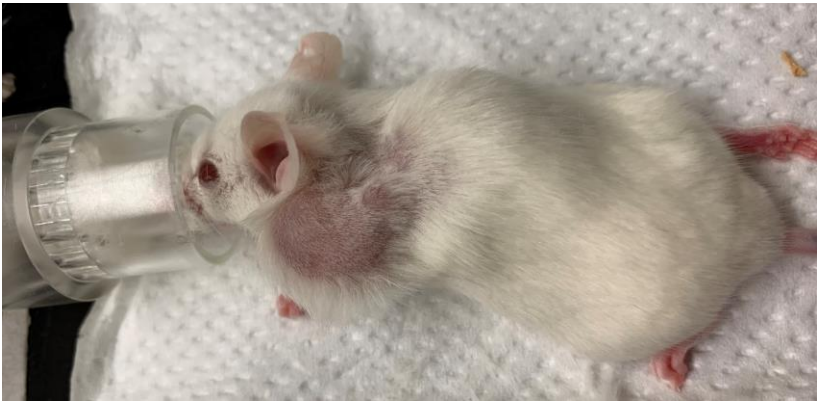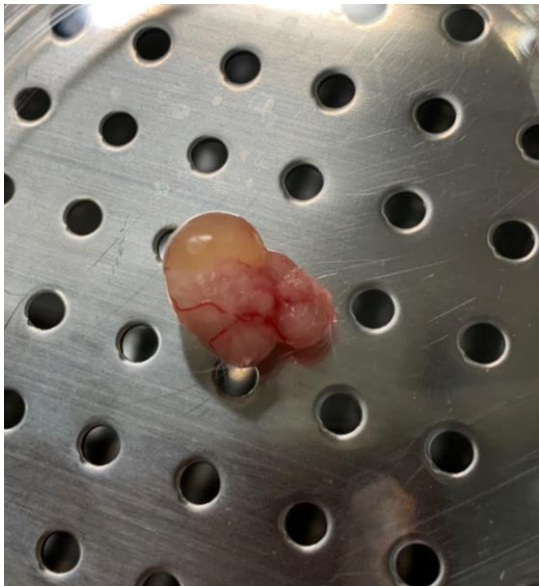

903<sup>TM</sup> Protein Saver Card  
For Research Use Only  
Not for use in diagnostic procedures

↑ Tuck Cover Here ↑

Name Mus 16 Etterbeh. (P3)  
Date 25.6.19 CHP

## Page 22

blood my  
ends  
plasma

Weight curve

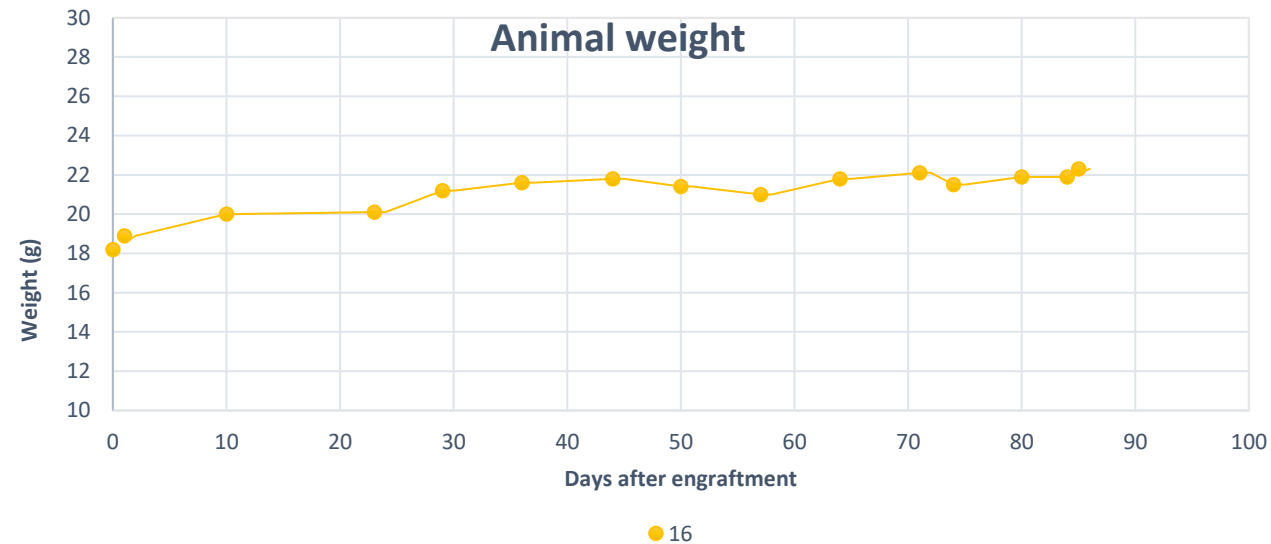

Xenograft growth curve

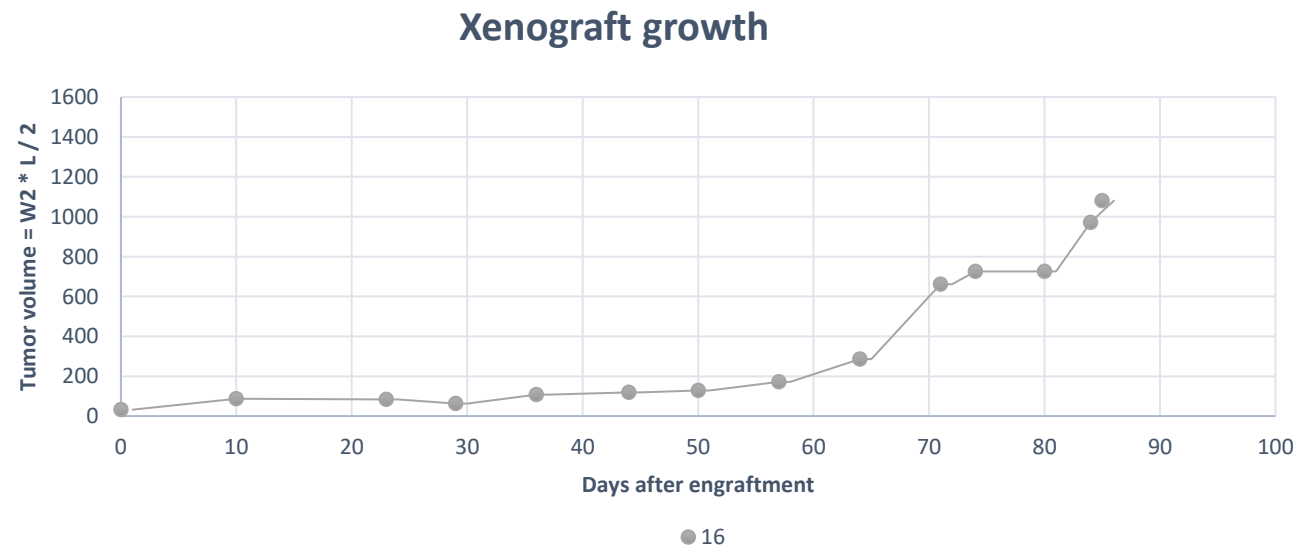



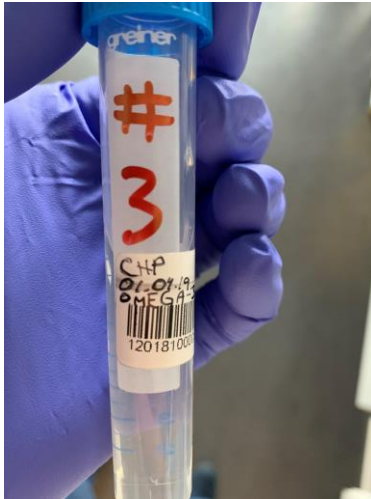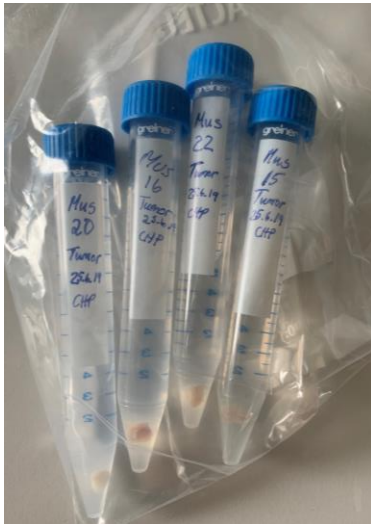

M16X

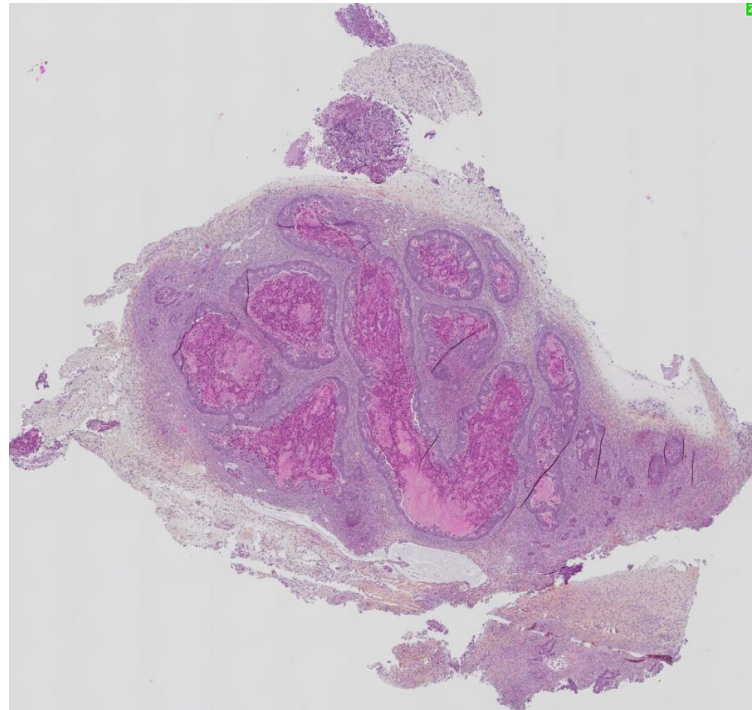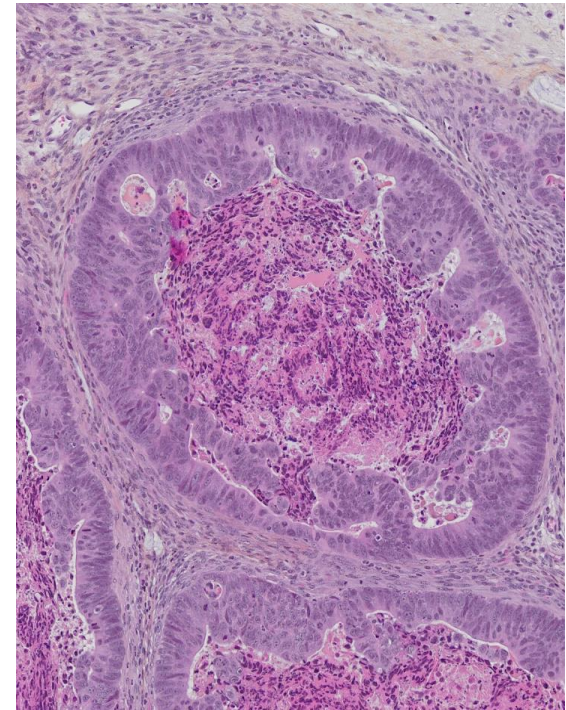

- Typical colorectal adenocarcinoma
- Very similar to the HES staining of patient tumor 3
- Necrotic debris within glandulas

## Mouse 17

- Surgery date: 01.04.19
  - Age (weeks) 11
  - Weight (g) 18.4
  - Tumor fragment P3-2B
  - Ear marks 4

| MUS                                         |                       |        | FOTS         |
|---------------------------------------------|-----------------------|--------|--------------|
| Kjønn                                       | ♀                     | Stamme | CIEA NOG     |
| Alder/vekt                                  | 6u                    | Antall | 1            |
| Bruker                                      | Caroline H. Pettersen |        | Ankomst dato |
| 17                                          |                       |        | 25/2-19      |
| 1.4.19 satt im xenograft P3-2B - mus nr. 4. |                       |        |              |
|                                             |                       |        |              |
|                                             |                       |        |              |
|                                             |                       |        |              |
|                                             |                       |        |              |

**Supplementary figure 1-17-1.**  
Pictures from the engraftment day

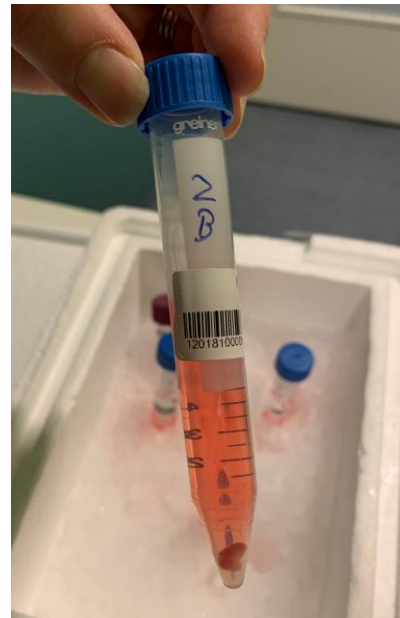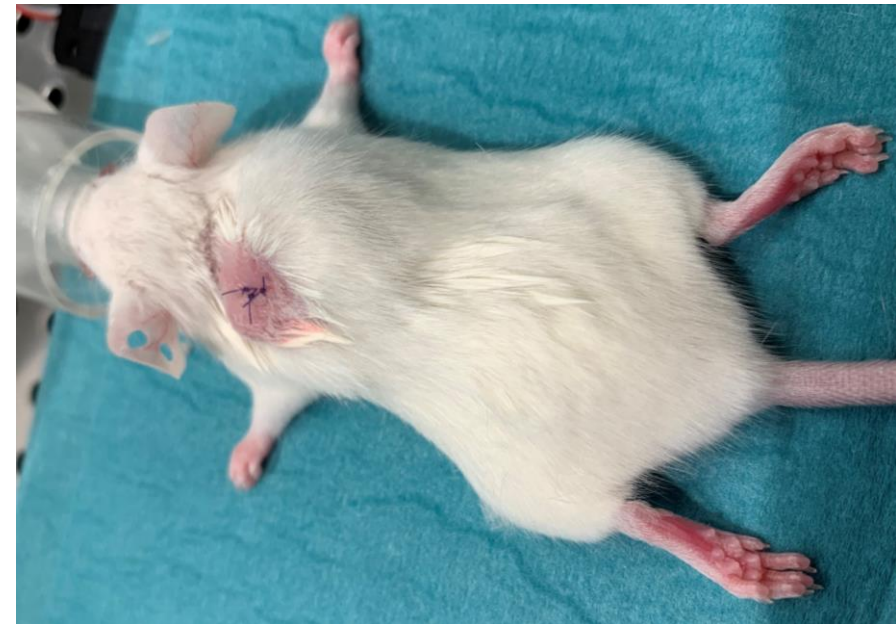

**Supplementary figure 1-17-2.** List over weight registrations of the drinking bottle before and after provided to the mice Page 26

Treatment:

- Smartfish with fishoil (OMEGA-3) ; started 04.07.19.
  - Xenograft 7.5 x 7.5 mm
  - Mouse 12 was used as social animal together with mouse 17
- Died 12.07.19 during anasthesia
- Xenograft not sampled
- Xenograft not pictured

Mus 12 brukt som sosialt dyr, plassert i cage  
bør nær mus 17 døde

|            |       |       |  |  |  |  |  |
|------------|-------|-------|--|--|--|--|--|
| 01.07.2019 |       |       |  |  |  |  |  |
| 02.07.2019 |       |       |  |  |  |  |  |
| 03.07.2019 |       |       |  |  |  |  |  |
| 04.07.2019 | 135,5 | 127,8 |  |  |  |  |  |
| 05.07.2019 | 139,6 | 128,6 |  |  |  |  |  |
| 08.07.2019 | 138,6 | 129,5 |  |  |  |  |  |
| 09.07.2019 | 138,8 | 129,0 |  |  |  |  |  |
| 10.07.2019 | 136,6 | 127,4 |  |  |  |  |  |
| 11.07.2019 | 136,7 | 127,6 |  |  |  |  |  |
| 12.07.2019 | 137,9 |       |  |  |  |  |  |
| 15.07.2019 |       |       |  |  |  |  |  |
| 16.07.2019 |       |       |  |  |  |  |  |

→ Mus 17 døde i maddeskann



## Page 27

[illegible]

Effect within 3 days, euthanize the animal

Weight curve

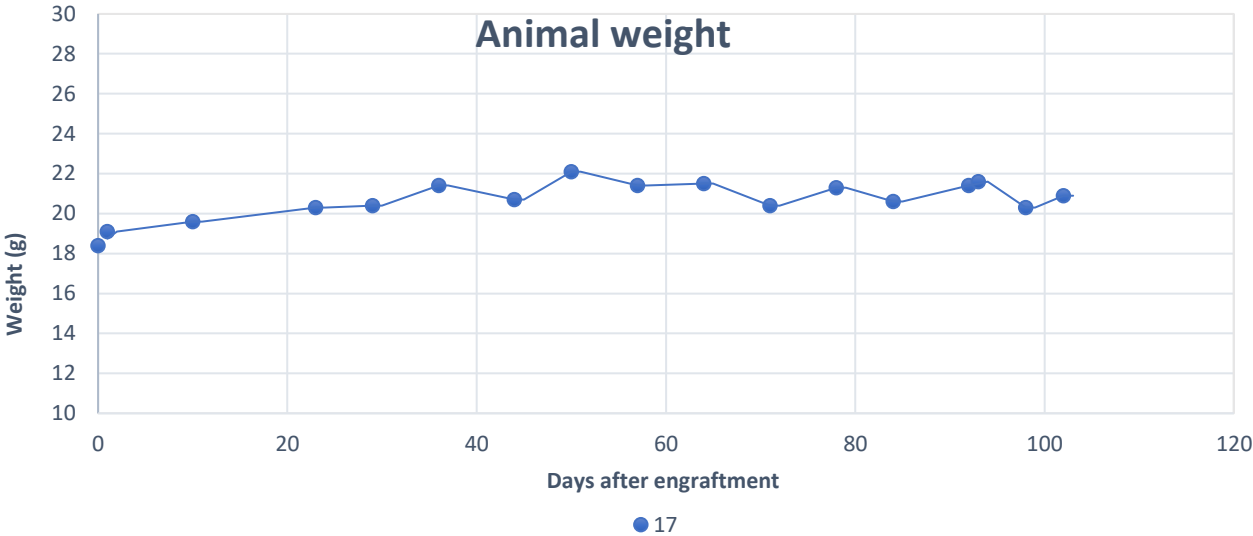

Xenograft growth curve

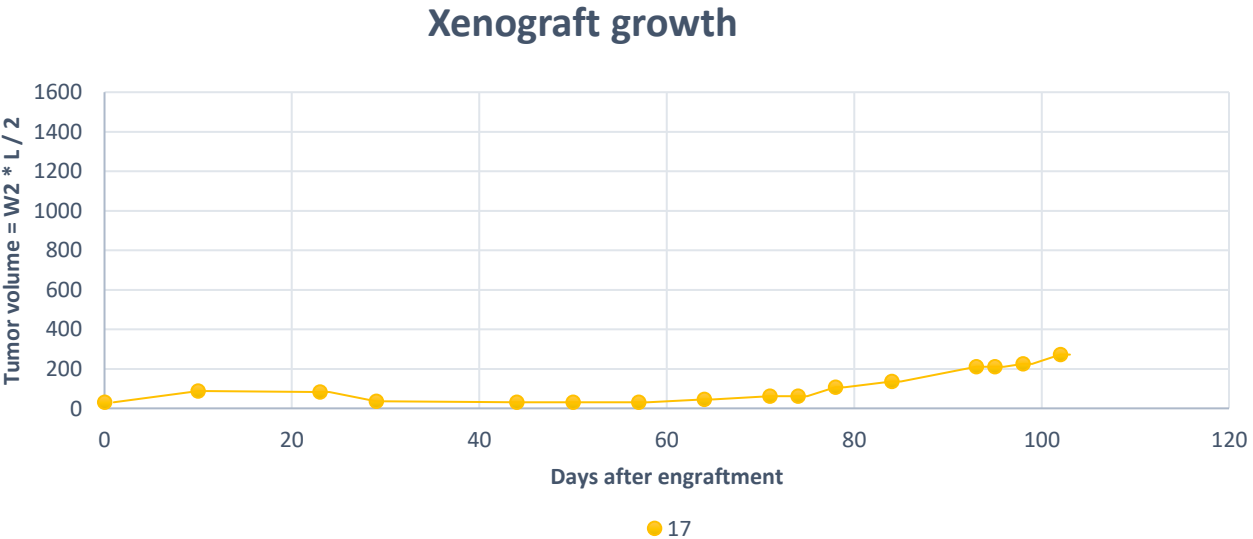

## Mouse 18

- Surgery date: 03.09.19
  - Age (weeks) 33
  - Weight (g) 22.1
  - Tumor fragment P19-2b
  - Fragment size 3 x 3 mm
  - Ear marks 4

**Supplementary figure 1-18-1.**  
Pictures from the engraftment day

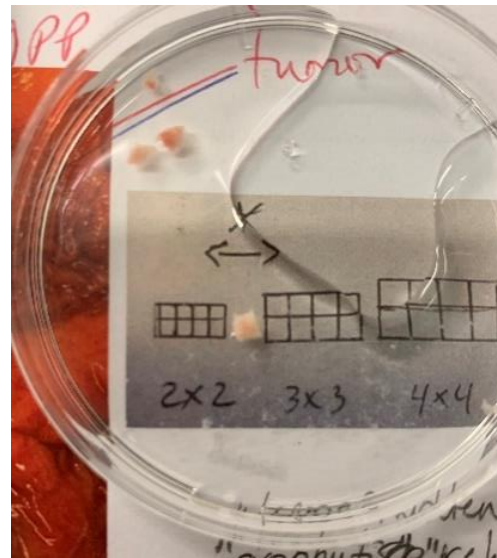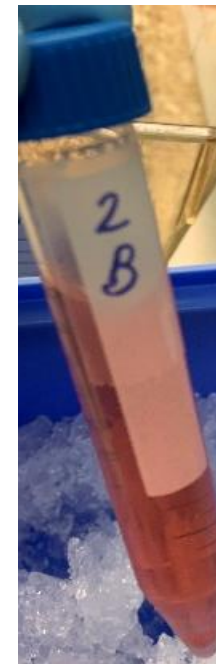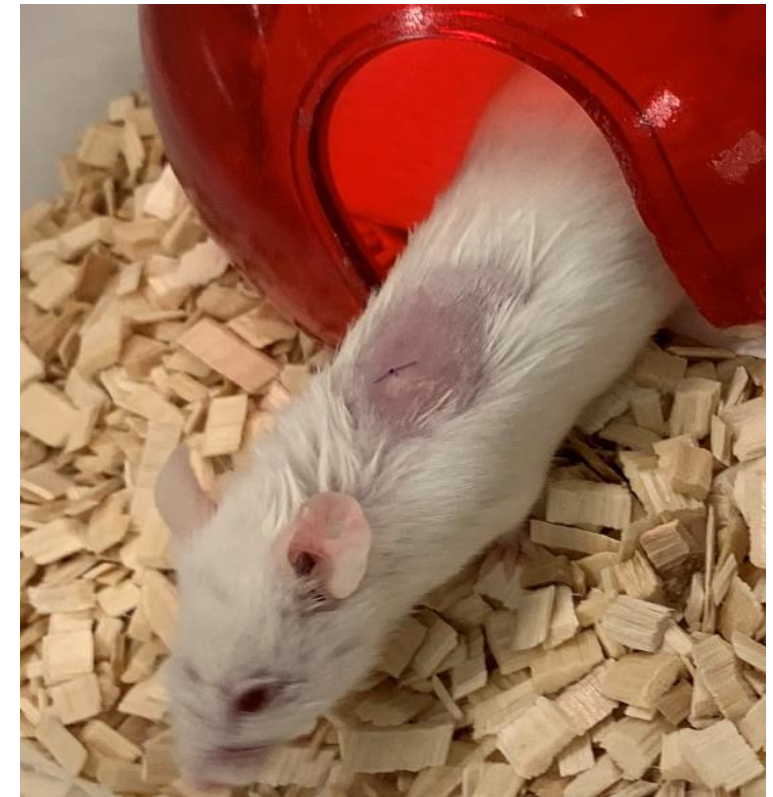



Supplementary figure 1-18-2. Pictures from follow up and tumor size measurement

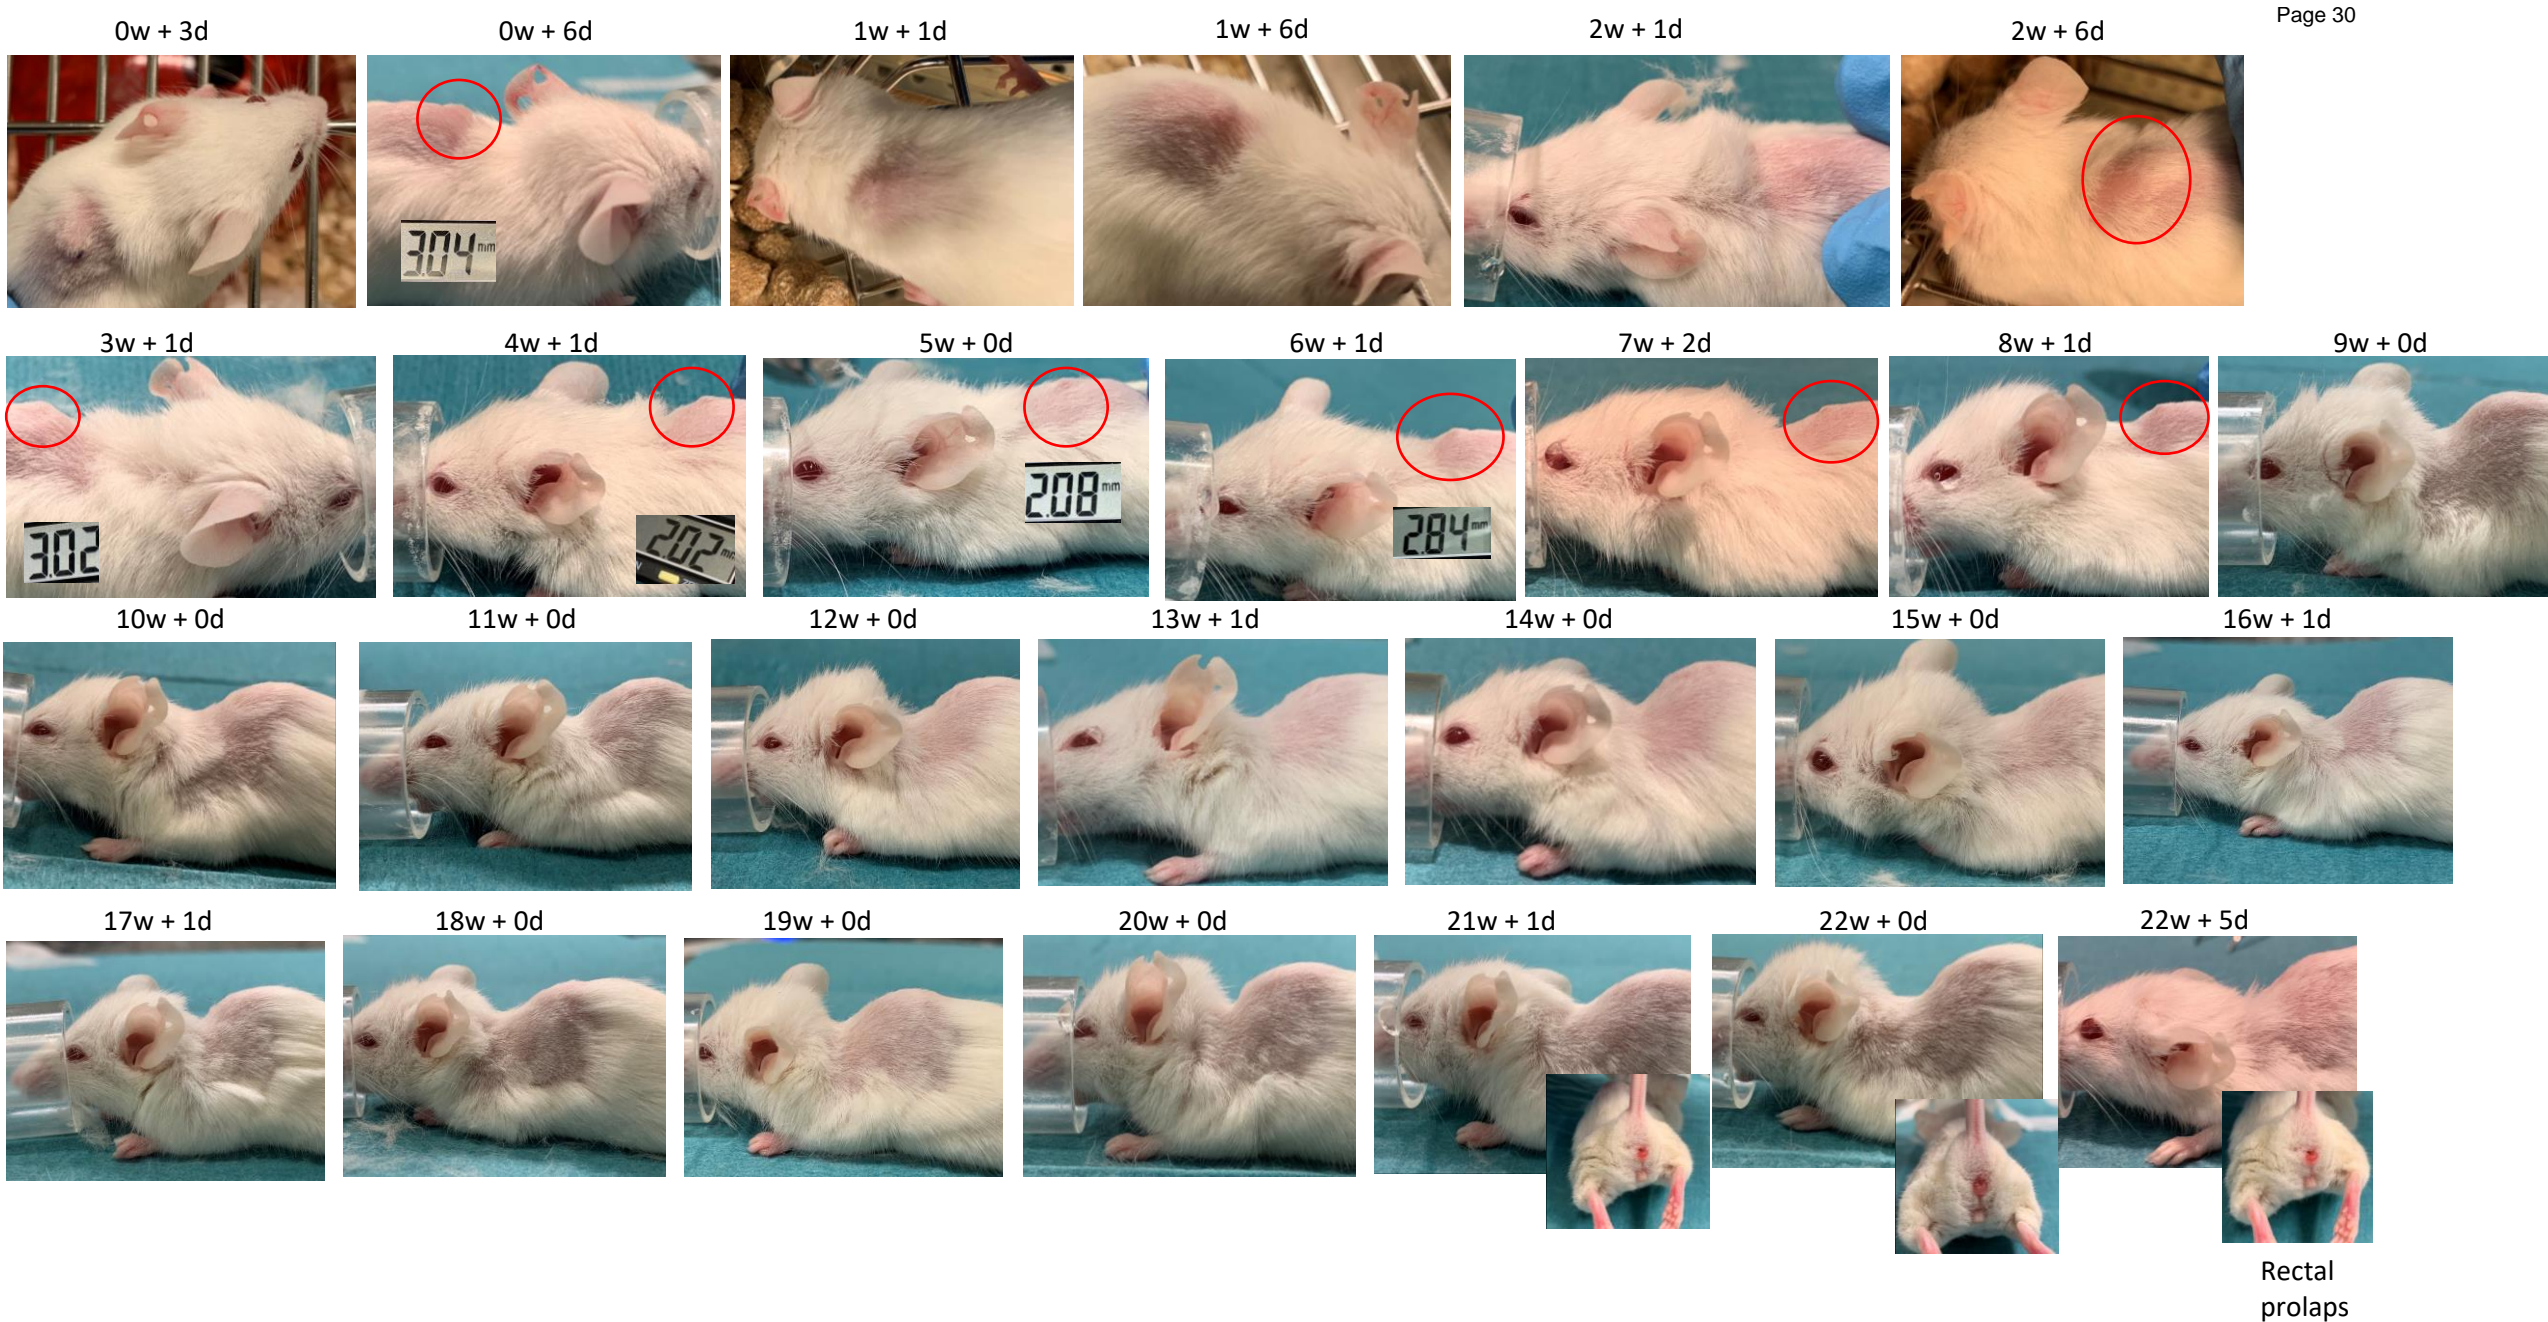

## Supplementary figure 1-18-3. Pictures euthanization (10.02.20)

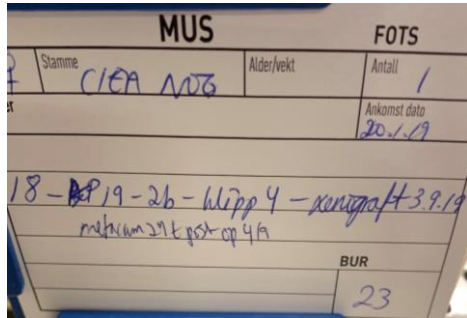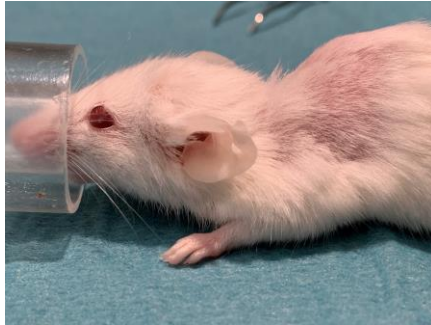

Reduced health, Rectal prolaps; svollen bloody anal opening  
Weight slightly reduced.

### Before euthanization:

- Reduced health
- Rectal prolaps; red, svollen anus opening
- Reduced Weight 19,8 g
- Not growing xenograft (xenograft almost not visible)
- No treatment given

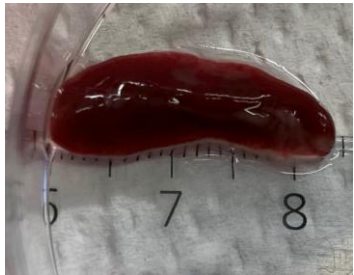

Large spleen, ca 2,5 cm,  
normal colour

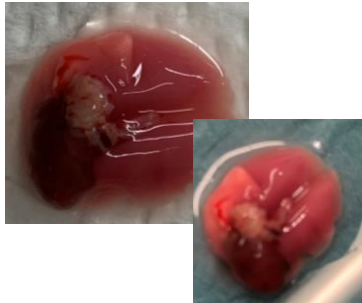

Whitish part of one lung

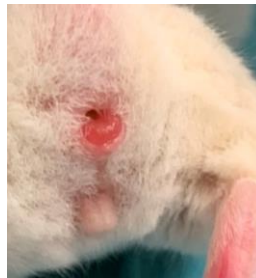

Red, svollen anal opening

### After euthanization:

- Enlarged spleen 2,5 cm
- Whitish part of one lung
- Xenograft did not seem to have grown

### Histology samples:

- **M32ET** Rectum
- **M32N** Kidneys
- **M32MP** Milt/pancreas
- **M32LH** Lung and Heart
- **M32L** Liver

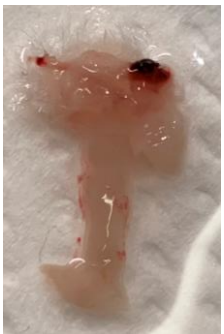

Bloody anal opening of  
rectum

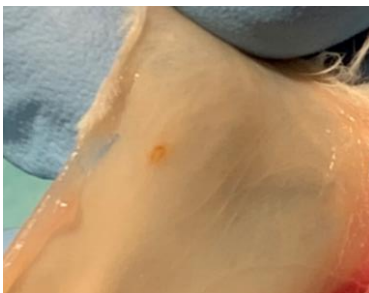

Only a small spot left of the  
xenograft



# Supplementary figure 1-18-4. Pictures of score sheets

NTNU Score sheet FOTS: Avdeling for komparativ medisin (AKM) Responsible researcher: Pettersen (P19-26) Animal ID: 18 Wipp 4

| Parameter                                               | State                                        | Assessment scale | Date | Date | Date | Date | Date | Date | Date | Date | Date | Date | Date | Date |
|---------------------------------------------------------|----------------------------------------------|------------------|------|------|------|------|------|------|------|------|------|------|------|------|
| General appearance                                      | Normal                                       | 0                | 3/9  | 4/9  | 6/9  | 9/9  | 11/9 | 13/9 | 16/9 | 18/9 | 20/9 | 23/9 | 25/9 |      |
|                                                         | Reduced grooming                             | 1                |      |      |      |      |      |      |      |      |      |      |      |      |
|                                                         | Minor distention of abdomen, rough hair coat | 3                |      |      |      |      |      |      |      |      |      |      |      |      |
|                                                         | Hunchback or distended abdomen, inactive     | 18               |      |      |      |      |      |      |      |      |      |      |      |      |
| Behaviour (Level of activity)                           | Normal                                       | 0                |      |      |      |      |      |      |      |      |      |      |      |      |
|                                                         | Slightly reduced                             | 1                |      |      |      |      |      |      |      |      |      |      |      |      |
|                                                         | Moderately reduced                           | 3                |      |      |      |      |      |      |      |      |      |      |      |      |
|                                                         | Distressed behaviour due to growing tumour   | 3                |      |      |      |      |      |      |      |      |      |      |      |      |
|                                                         | Obviously reduced                            | 5                |      |      |      |      |      |      |      |      |      |      |      |      |
|                                                         | Isolated, inactive, lethargic                | 18               |      |      |      |      |      |      |      |      |      |      |      |      |
| Body weight (Compared to body weight before experiment) | Body weight:                                 |                  | 21.2 |      | 21.2 | 21.4 | 22.1 | 21.9 | 22.5 | 22.4 | 21.4 | 21   |      |      |
|                                                         | No loss                                      | 0                |      |      |      |      |      |      |      |      |      |      |      |      |
|                                                         | Loss < 5%                                    | 1                |      |      |      |      |      |      |      |      |      |      |      |      |
|                                                         | Loss 5-9%                                    | 3                |      |      |      |      |      |      |      |      |      |      |      |      |
|                                                         | Loss 10-14%                                  | 5                |      |      |      |      |      |      |      |      |      |      |      |      |
|                                                         | Loss > 15%                                   | 18               |      |      |      |      |      |      |      |      |      |      |      |      |
| Clinical signs (Infection, bleeding, discoloration)     | Normal                                       | 0                |      |      |      |      |      |      |      |      |      |      |      |      |
|                                                         | Minor irritation around surgical wound       | 1                |      |      |      |      |      |      |      |      |      |      |      |      |
|                                                         | Moderate irritation/infected surgical wound  | 3                |      |      |      |      |      |      |      |      |      |      |      |      |
|                                                         | Infected/open surgical wound                 | 4*               |      |      |      |      |      |      |      |      |      |      |      |      |
|                                                         | Tumour > 1.0 cm in diameter                  | 10               |      |      |      |      |      |      |      |      |      |      |      |      |
|                                                         | Tumour > 1.5 cm in diameter                  | 18               |      |      |      |      |      |      |      |      |      |      |      |      |
| Ulcerous tumour                                         | 18                                           |                  |      |      |      |      |      |      |      |      |      |      |      |      |

Total: 21

Comments, treatments etc: 0-3: Normal 4-9: Pay attention to health state and consider treatment 10-13: Pay close attention to health state, consider treatment or euthanasia 14-18: Euthanasia \*Start treatment with antibiotics. If no effect within 3 days, euthanize the animal

NTNU Score sheet FOTS: Avdeling for komparativ medisin (AKM) Responsible researcher: Pettersen (P19-26) Animal ID: 18 Wipp 4

| Parameter                                               | State                                        | Assessment scale | Date | Date | Date | Date | Date | Date | Date | Date | Date | Date | Date | Date |
|---------------------------------------------------------|----------------------------------------------|------------------|------|------|------|------|------|------|------|------|------|------|------|------|
| General appearance                                      | Normal                                       | 0                | 25/9 | 26/9 | 27/9 | 28/9 | 29/9 | 30/9 | 1/10 | 2/10 | 3/10 | 4/10 | 5/10 | 6/10 |
|                                                         | Reduced grooming                             | 1                |      |      |      |      |      |      |      |      |      |      |      |      |
|                                                         | Minor distention of abdomen, rough hair coat | 3                |      |      |      |      |      |      |      |      |      |      |      |      |
|                                                         | Hunchback or distended abdomen, inactive     | 18               |      |      |      |      |      |      |      |      |      |      |      |      |
| Behaviour (Level of activity)                           | Normal                                       | 0                |      |      |      |      |      |      |      |      |      |      |      |      |
|                                                         | Slightly reduced                             | 1                |      |      |      |      |      |      |      |      |      |      |      |      |
|                                                         | Moderately reduced                           | 3                |      |      |      |      |      |      |      |      |      |      |      |      |
|                                                         | Distressed behaviour due to growing tumour   | 3                |      |      |      |      |      |      |      |      |      |      |      |      |
|                                                         | Obviously reduced                            | 5                |      |      |      |      |      |      |      |      |      |      |      |      |
|                                                         | Isolated, inactive, lethargic                | 18               |      |      |      |      |      |      |      |      |      |      |      |      |
| Body weight (Compared to body weight before experiment) | Body weight:                                 |                  | 21   | 21.3 | 21.7 | 21.3 | 20.9 | 21.3 | 21.5 | 20.5 | 21.0 | 21.7 |      |      |
|                                                         | No loss                                      | 0                |      |      |      |      |      |      |      |      |      |      |      |      |
|                                                         | Loss < 5%                                    | 1                |      |      |      |      |      |      |      |      |      |      |      |      |
|                                                         | Loss 5-9%                                    | 3                |      |      |      |      |      |      |      |      |      |      |      |      |
|                                                         | Loss 10-14%                                  | 5                |      |      |      |      |      |      |      |      |      |      |      |      |
|                                                         | Loss > 15%                                   | 18               |      |      |      |      |      |      |      |      |      |      |      |      |
| Clinical signs (Infection, bleeding, discoloration)     | Normal                                       | 0                |      |      |      |      |      |      |      |      |      |      |      |      |
|                                                         | Minor irritation around surgical wound       | 1                |      |      |      |      |      |      |      |      |      |      |      |      |
|                                                         | Moderate irritation/infected surgical wound  | 3                |      |      |      |      |      |      |      |      |      |      |      |      |
|                                                         | Infected/open surgical wound                 | 4*               |      |      |      |      |      |      |      |      |      |      |      |      |
|                                                         | Tumour > 1.0 cm in diameter                  | 10               |      |      |      |      |      |      |      |      |      |      |      |      |
|                                                         | Tumour > 1.5 cm in diameter                  | 18               |      |      |      |      |      |      |      |      |      |      |      |      |
| Ulcerous tumour                                         | 18                                           |                  |      |      |      |      |      |      |      |      |      |      |      |      |

Total: 21

Comments, treatments etc: 0-3: Normal 4-9: Pay attention to health state and consider treatment 10-13: Pay close attention to health state, consider treatment or euthanasia 14-18: Euthanasia \*Start treatment with antibiotics. If no effect within 3 days, euthanize the animal

NTNU Score sheet FOTS: Avdeling for komparativ medisin (AKM) Responsible researcher: Pettersen (P19-26) Animal ID: 18 Wipp 4

| Parameter                                               | State                                        | Assessment scale | Date  | Date  | Date  | Date  | Date  | Date  | Date  | Date | Date | Date | Date | Date |
|---------------------------------------------------------|----------------------------------------------|------------------|-------|-------|-------|-------|-------|-------|-------|------|------|------|------|------|
| General appearance                                      | Normal                                       | 0                | 18/11 | 20/11 | 22/11 | 24/11 | 26/11 | 28/11 | 30/11 | 1/12 | 3/12 | 5/12 | 7/12 | 9/12 |
|                                                         | Reduced grooming                             | 1                |       |       |       |       |       |       |       |      |      |      |      |      |
|                                                         | Minor distention of abdomen, rough hair coat | 3                |       |       |       |       |       |       |       |      |      |      |      |      |
|                                                         | Hunchback or distended abdomen, inactive     | 18               |       |       |       |       |       |       |       |      |      |      |      |      |
| Behaviour (Level of activity)                           | Normal                                       | 0                |       |       |       |       |       |       |       |      |      |      |      |      |
|                                                         | Slightly reduced                             | 1                |       |       |       |       |       |       |       |      |      |      |      |      |
|                                                         | Moderately reduced                           | 3                |       |       |       |       |       |       |       |      |      |      |      |      |
|                                                         | Distressed behaviour due to growing tumour   | 3                |       |       |       |       |       |       |       |      |      |      |      |      |
|                                                         | Obviously reduced                            | 5                |       |       |       |       |       |       |       |      |      |      |      |      |
|                                                         | Isolated, inactive, lethargic                | 18               |       |       |       |       |       |       |       |      |      |      |      |      |
| Body weight (Compared to body weight before experiment) | Body weight:                                 |                  | 21.6  | 21.5  | 22.2  | 21.9  | 21.1  | 20.2  | 20.8  | 20.6 | 20.8 | 20.3 |      |      |
|                                                         | No loss                                      | 0                |       |       |       |       |       |       |       |      |      |      |      |      |
|                                                         | Loss < 5%                                    | 1                |       |       |       |       |       |       |       |      |      |      |      |      |
|                                                         | Loss 5-9%                                    | 3                |       |       |       |       |       |       |       |      |      |      |      |      |
|                                                         | Loss 10-14%                                  | 5                |       |       |       |       |       |       |       |      |      |      |      |      |
|                                                         | Loss > 15%                                   | 18               |       |       |       |       |       |       |       |      |      |      |      |      |
| Clinical signs (Infection, bleeding, discoloration)     | Normal                                       | 0                |       |       |       |       |       |       |       |      |      |      |      |      |
|                                                         | Minor irritation around surgical wound       | 1                |       |       |       |       |       |       |       |      |      |      |      |      |
|                                                         | Moderate irritation/infected surgical wound  | 3                |       |       |       |       |       |       |       |      |      |      |      |      |
|                                                         | Infected/open surgical wound                 | 4*               |       |       |       |       |       |       |       |      |      |      |      |      |
|                                                         | Tumour > 1.0 cm in diameter                  | 10               |       |       |       |       |       |       |       |      |      |      |      |      |
|                                                         | Tumour > 1.5 cm in diameter                  | 18               |       |       |       |       |       |       |       |      |      |      |      |      |
| Ulcerous tumour                                         | 18                                           |                  |       |       |       |       |       |       |       |      |      |      |      |      |

Total: 21

Comments, treatments etc: 0-3: Normal 4-9: Pay attention to health state and consider treatment 10-13: Pay close attention to health state, consider treatment or euthanasia 14-18: Euthanasia \*Start treatment with antibiotics. If no effect within 3 days, euthanize the animal

NTNU Score sheet FOTS: Avdeling for komparativ medisin (AKM) Responsible researcher: Pettersen (P19-26) Animal ID: 18 Wipp 4

| Parameter                                               | State                                        | Assessment scale | Date  | Date  | Date  | Date  | Date  | Date  | Date | Date | Date | Date | Date | Date  |
|---------------------------------------------------------|----------------------------------------------|------------------|-------|-------|-------|-------|-------|-------|------|------|------|------|------|-------|
| General appearance                                      | Normal                                       | 0                | 21/10 | 23/10 | 25/10 | 27/10 | 29/10 | 31/10 | 1/11 | 3/11 | 5/11 | 7/11 | 9/11 | 11/11 |
|                                                         | Reduced grooming                             | 1                |       |       |       |       |       |       |      |      |      |      |      |       |
|                                                         | Minor distention of abdomen, rough hair coat | 3                |       |       |       |       |       |       |      |      |      |      |      |       |
|                                                         | Hunchback or distended abdomen, inactive     | 18               |       |       |       |       |       |       |      |      |      |      |      |       |
| Behaviour (Level of activity)                           | Normal                                       | 0                |       |       |       |       |       |       |      |      |      |      |      |       |
|                                                         | Slightly reduced                             | 1                |       |       |       |       |       |       |      |      |      |      |      |       |
|                                                         | Moderately reduced                           | 3                |       |       |       |       |       |       |      |      |      |      |      |       |
|                                                         | Distressed behaviour due to growing tumour   | 3                |       |       |       |       |       |       |      |      |      |      |      |       |
|                                                         | Obviously reduced                            | 5                |       |       |       |       |       |       |      |      |      |      |      |       |
|                                                         | Isolated, inactive, lethargic                | 18               |       |       |       |       |       |       |      |      |      |      |      |       |
| Body weight (Compared to body weight before experiment) | Body weight:                                 |                  | 21.7  | 21.6  | 20.5  | 20.2  | 20.5  | 20.0  | 21.4 | 21.8 | 21.1 |      |      |       |
|                                                         | No loss                                      | 0                |       |       |       |       |       |       |      |      |      |      |      |       |
|                                                         | Loss < 5%                                    | 1                |       |       |       |       |       |       |      |      |      |      |      |       |
|                                                         | Loss 5-9%                                    | 3                |       |       |       |       |       |       |      |      |      |      |      |       |
|                                                         | Loss 10-14%                                  | 5                |       |       |       |       |       |       |      |      |      |      |      |       |
|                                                         | Loss > 15%                                   | 18               |       |       |       |       |       |       |      |      |      |      |      |       |
| Clinical signs (Infection, bleeding, discoloration)     | Normal                                       | 0                |       |       |       |       |       |       |      |      |      |      |      |       |
|                                                         | Minor irritation around surgical wound       | 1                |       |       |       |       |       |       |      |      |      |      |      |       |
|                                                         | Moderate irritation/infected surgical wound  | 3                |       |       |       |       |       |       |      |      |      |      |      |       |
|                                                         | Infected/open surgical wound                 | 4*               |       |       |       |       |       |       |      |      |      |      |      |       |
|                                                         | Tumour > 1.0 cm in diameter                  | 10               |       |       |       |       |       |       |      |      |      |      |      |       |
|                                                         | Tumour > 1.5 cm in diameter                  | 18               |       |       |       |       |       |       |      |      |      |      |      |       |
| Ulcerous tumour                                         | 18                                           |                  |       |       |       |       |       |       |      |      |      |      |      |       |

Total: 21

Comments, treatments etc: 0-3: Normal 4-9: Pay attention to health state and consider treatment 10-13: Pay close attention to health state, consider treatment or euthanasia 14-18: Euthanasia \*Start treatment with antibiotics. If no effect within 3 days, euthanize the animal

NTNU Score sheet FOTS: Avdeling for komparativ medisin (AKM) Responsible researcher: Pettersen (P19-26) Animal ID: 18 Wipp 4

| Parameter                                               | State                                        | Assessment scale | Date  | Date  | Date  | Date  | Date  | Date  | Date  | Date | Date | Date | Date | Date |
|---------------------------------------------------------|----------------------------------------------|------------------|-------|-------|-------|-------|-------|-------|-------|------|------|------|------|------|
| General appearance                                      | Normal                                       | 0                | 18/10 | 20/10 | 22/10 | 24/10 | 26/10 | 28/10 | 30/10 | 1/11 | 3/11 | 5/11 | 7/11 | 9/11 |
|                                                         | Reduced grooming                             | 1                |       |       |       |       |       |       |       |      |      |      |      |      |
|                                                         | Minor distention of abdomen, rough hair coat | 3                |       |       |       |       |       |       |       |      |      |      |      |      |
|                                                         | Hunchback or distended abdomen, inactive     | 18               |       |       |       |       |       |       |       |      |      |      |      |      |
| Behaviour (Level of activity)                           | Normal                                       | 0                |       |       |       |       |       |       |       |      |      |      |      |      |
|                                                         | Slightly reduced                             | 1                |       |       |       |       |       |       |       |      |      |      |      |      |
|                                                         | Moderately reduced                           | 3                |       |       |       |       |       |       |       |      |      |      |      |      |
|                                                         | Distressed behaviour due to growing tumour   | 3                |       |       |       |       |       |       |       |      |      |      |      |      |
|                                                         | Obviously reduced                            | 5                |       |       |       |       |       |       |       |      |      |      |      |      |
|                                                         | Isolated, inactive, lethargic                | 18               |       |       |       |       |       |       |       |      |      |      |      |      |
| Body weight (Compared to body weight before experiment) | Body weight:                                 |                  | 21    | 21.3  | 21.4  | 21.5  | 21.4  | 21.5  | 21.6  | 22.6 | 22.5 | 22.8 | 22.2 |      |
|                                                         | No loss                                      | 0                |       |       |       |       |       |       |       |      |      |      |      |      |
|                                                         | Loss < 5%                                    | 1                |       |       |       |       |       |       |       |      |      |      |      |      |
|                                                         | Loss 5-9%                                    | 3                |       |       |       |       |       |       |       |      |      |      |      |      |
|                                                         | Loss 10-14%                                  | 5                |       |       |       |       |       |       |       |      |      |      |      |      |
|                                                         | Loss > 15%                                   | 18               |       |       |       |       |       |       |       |      |      |      |      |      |
| Clinical signs (Infection, bleeding, discoloration)     | Normal                                       | 0                |       |       |       |       |       |       |       |      |      |      |      |      |
|                                                         | Minor irritation around surgical wound       | 1                |       |       |       |       |       |       |       |      |      |      |      |      |
|                                                         | Moderate irritation/infected surgical wound  | 3                |       |       |       |       |       |       |       |      |      |      |      |      |
|                                                         | Infected/open surgical wound                 | 4*               |       |       |       |       |       |       |       |      |      |      |      |      |
|                                                         | Tumour > 1.0 cm in diameter                  | 10               |       |       |       |       |       |       |       |      |      |      |      |      |
|                                                         | Tumour > 1.5 cm in diameter                  | 18               |       |       |       |       |       |       |       |      |      |      |      |      |
| Ulcerous tumour                                         | 18                                           |                  |       |       |       |       |       |       |       |      |      |      |      |      |

Total: 21

Comments, treatments etc: 0-3: Normal 4-9: Pay attention to health state and consider treatment 10-13: Pay close attention to health state, consider treatment or euthanasia 14-18: Euthanasia \*Start treatment with antibiotics. If no effect within 3 days, euthanize the animal

NTNU Score sheet FOTS: Avdeling for komparativ medisin (AKM) Responsible researcher: Pettersen (P19-26) Animal ID: 18 Wipp 4

| Parameter | State | Assessment scale | Date | Date |
|-----------|-------|------------------|------|------|
|-----------|-------|------------------|------|------|

Weight curve

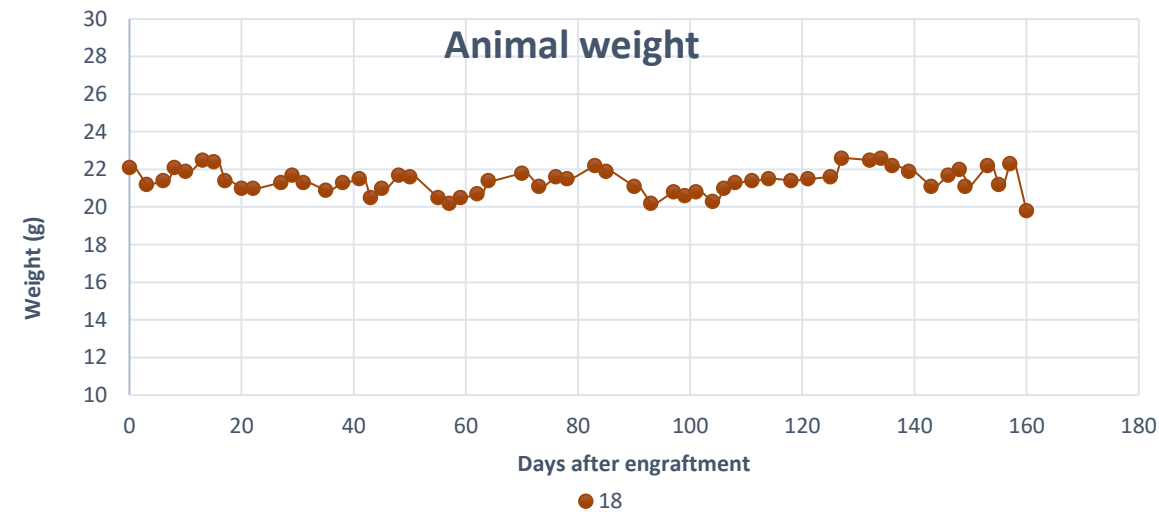

Xenograft growth curve

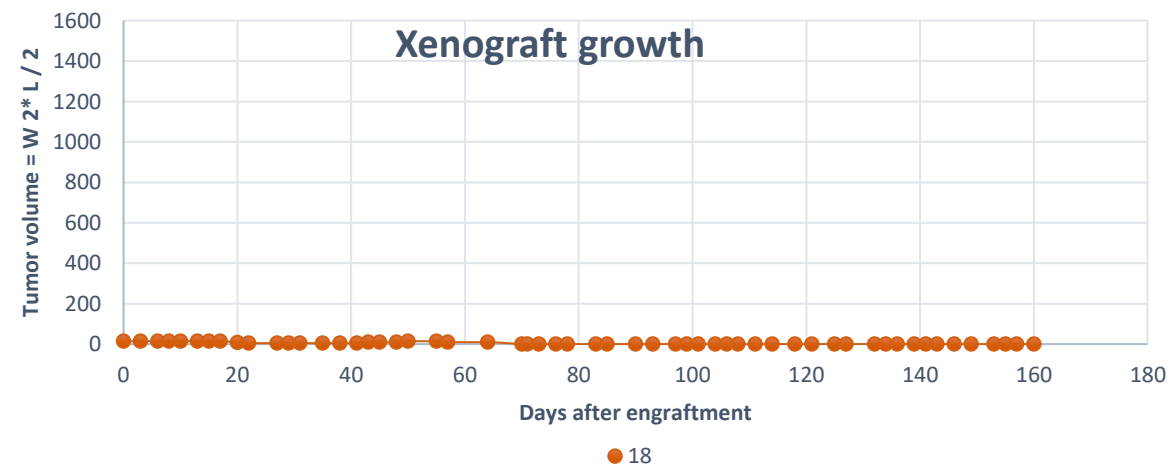



## Mouse 19

- Surgery date: 14.05.19
  - Age (weeks) 17
  - Weight (g) 20.6
  - Tumor fragment P11-1A
  - Fragment size 4\*4 mm
  - Ear marks 1

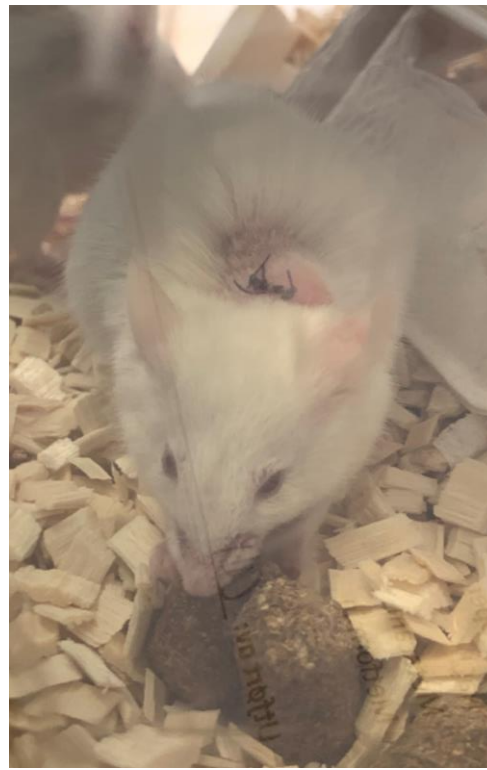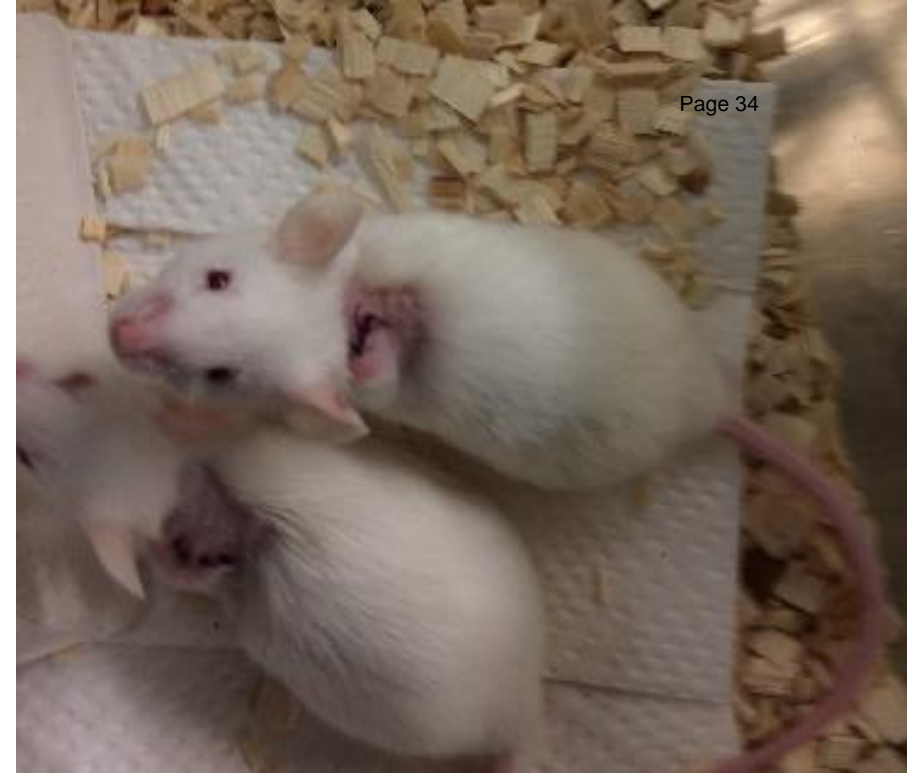

**Supplementary figure 1-19-1.** Pictures from the engraftment day

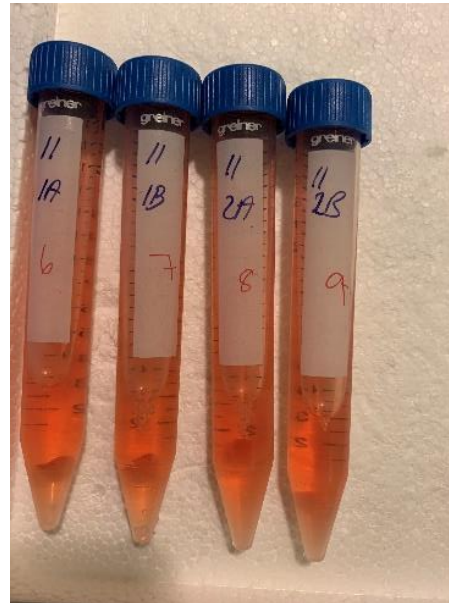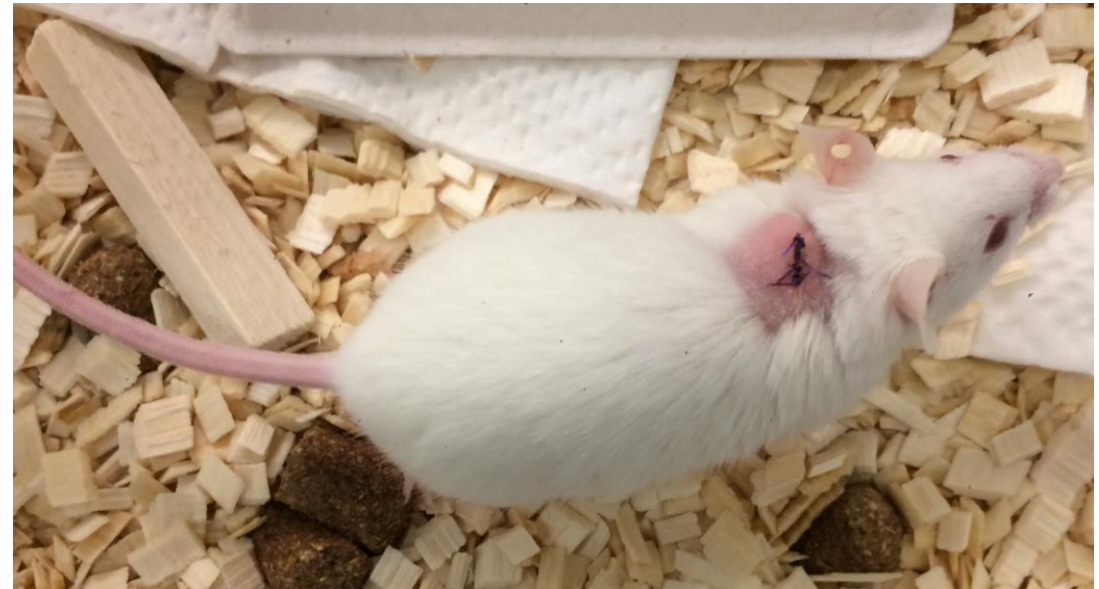



**Supplementary figure 1-19-2.** Pictures from follow up

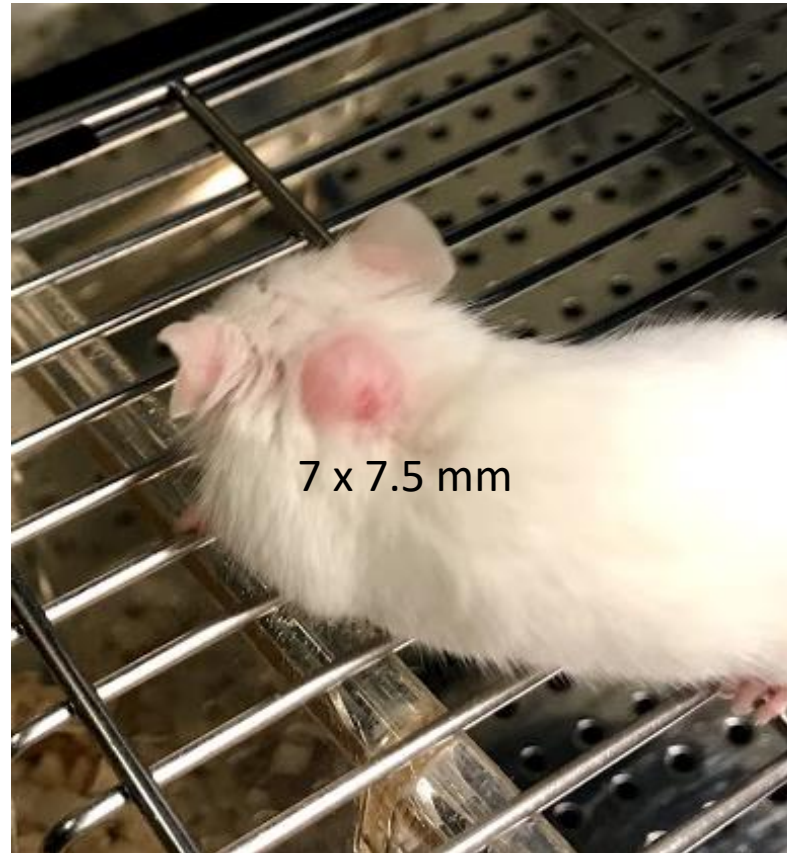

18.07.2019

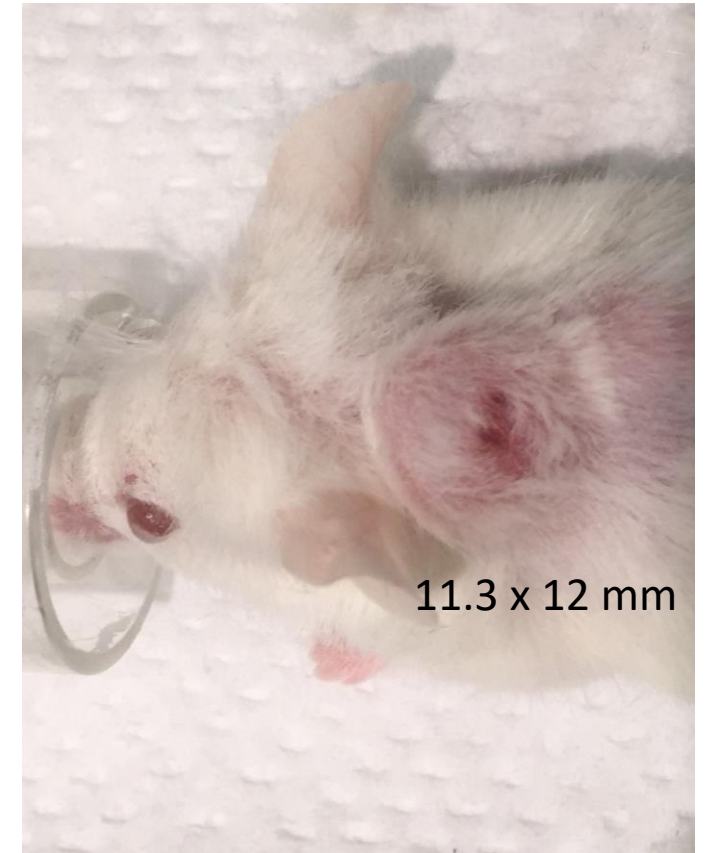

30.07.2019

**Supplementary figure 1-19-3.** List over weight registrations of the drinking bottle  
(with Smartfish Remune Peach) before and after provided to the mouse

- Smartfish with fishoil (OMEGA-3)
- 5 days
- Blodsamples were taken before and after treatment

|            |       |       |           |    |        |  |  |  |  |
|------------|-------|-------|-----------|----|--------|--|--|--|--|
| 22.07.2019 |       |       |           |    |        |  |  |  |  |
| 23.07.2019 |       |       |           |    |        |  |  |  |  |
| 24.07.2019 | 130.7 | 127.0 | → 5 dager | 19 | OMEGA3 |  |  |  |  |
| 25.07.2019 | 138.9 | 133.8 |           |    |        |  |  |  |  |
| 26.07.2019 | 138.8 | 132.9 |           |    |        |  |  |  |  |
| 29.07.2019 | 137.9 | 126.6 |           |    |        |  |  |  |  |
| 30.07.2019 | 140.0 |       |           |    |        |  |  |  |  |
| 31.07.     |       |       |           |    |        |  |  |  |  |
| 01.08      |       |       |           |    |        |  |  |  |  |
| 02.09      |       |       |           |    |        |  |  |  |  |

in 09<sup>00</sup>

Sår → avviket



**Supplementary figure 1-19-4. Pictures from euthanization (30.07.19)**

- Xenograft size 11.3 x 12 mm
- Wound on skin over xenograft
- Blood sample (blood card and plasma)
- Tumor tissue for
  - Histology
  - RNA isolation
  - Protein isolation
- Note; stomach contains nutrition drink

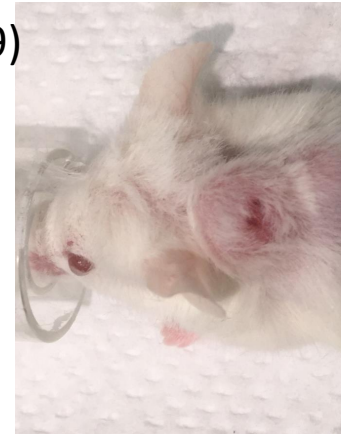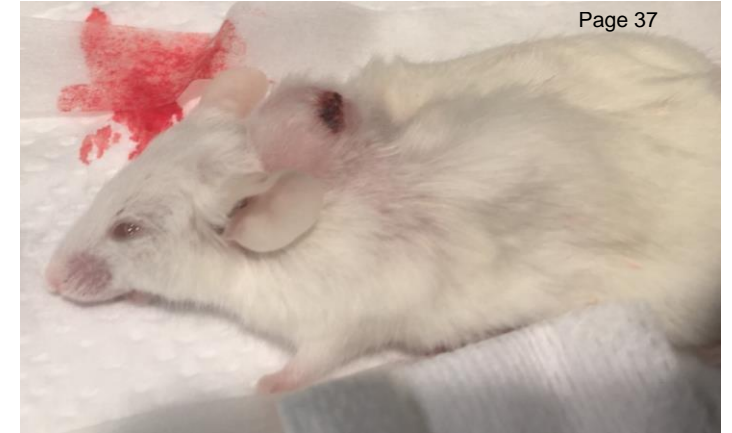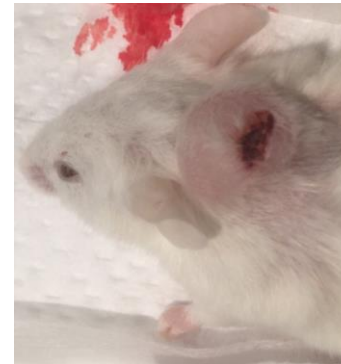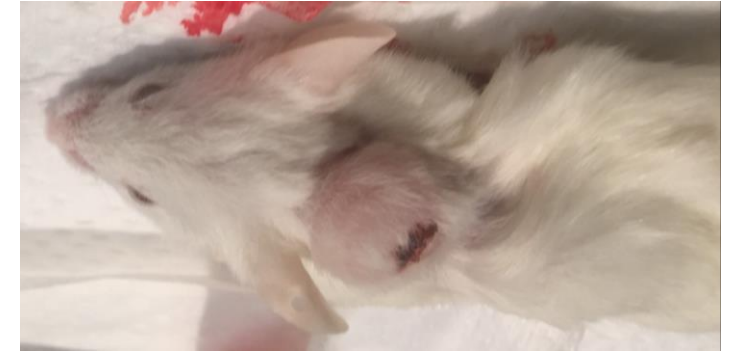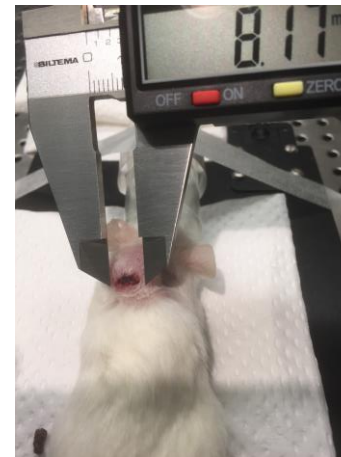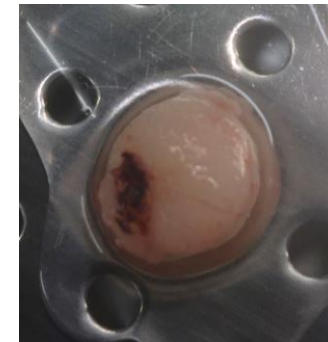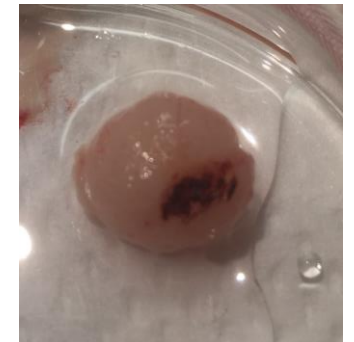

Supplementary figure 1-19-5. Pictures of score sheet

 NTNU Score sheet FOTS:  
Avdeling for komparativ medisin (AKM)

Responsible researcher: 19

Animal ID: Omega 3  
P11-1a

| Parameter                                               | State                                        | Assessment scale | Date      | Date   | Date    | Date | Date | Date | Date | Date   | Date | Date | Date |
|---------------------------------------------------------|----------------------------------------------|------------------|-----------|--------|---------|------|------|------|------|--------|------|------|------|
| General appearance                                      | Normal                                       | 0                | 28/5      | 6/6/19 | 11/6-19 | 14/6 | 18/6 | 24/6 | 02/7 | 23.7   | 30.7 |      |      |
|                                                         | Reduced grooming                             | 1                | 6         |        |         |      |      |      | 0    | 0      | 0    |      |      |
|                                                         | Minor distention of abdomen, rough hair coat | 3                |           |        |         |      |      |      |      |        |      |      |      |
|                                                         | Hunchback or distended abdomen, inactive     | 18               |           |        |         |      |      |      |      |        |      |      |      |
| Behaviour (Level of activity)                           | Normal                                       | 0                | 0         |        |         |      |      |      |      |        |      |      |      |
|                                                         | Slightly reduced                             | 1                |           |        |         |      |      |      | 0    |        |      |      |      |
|                                                         | Moderately reduced                           | 3                |           |        |         |      |      |      |      | 0      | 0    |      |      |
|                                                         | Distressed behaviour due to growing tumour   | 3                |           |        |         |      |      |      |      |        |      |      |      |
|                                                         | Obviously reduced                            | 5                |           |        |         |      |      |      |      |        |      |      |      |
|                                                         | Isolated, inactive, lethargic                | 18               |           |        |         |      |      |      |      |        |      |      |      |
| Body weight (Compared to body weight before experiment) | Body weight:                                 |                  | 20.3      | 22.2   | 21.0    |      | 21.4 | 21.4 | 20.9 | 19.3   | 18.7 |      |      |
|                                                         | No loss                                      | 0                | 0         |        |         |      |      |      |      |        |      |      |      |
|                                                         | Loss < 5%                                    | 1                |           |        |         |      |      |      |      |        |      |      |      |
|                                                         | Loss 5-9 %                                   | 3                |           |        |         |      |      |      |      |        |      |      |      |
|                                                         | Loss 10-14%                                  | 5                |           |        |         |      |      |      |      |        |      |      |      |
|                                                         | Loss ≥ 15%                                   | 18               |           |        |         |      |      |      |      |        |      |      |      |
| Clinical signs (Infection, bleeding, discoloration)     | Normal                                       | 0                |           |        |         |      |      |      |      |        |      |      |      |
|                                                         | Minor irritation around surgical wound       | 1                | Ser 1 bla | 4ten   | 4ten    | -1-  | -1-  | -1-  | -1-  | Bu 7.9 | 2.07 | 1.12 |      |
|                                                         | Moderate irritation/infected surgical wound  | 3                | hilsar    | 4      | 4ten    |      |      |      |      |        |      |      |      |
|                                                         | Infected/open surgical wound                 | 4 *              | ca tube   |        |         |      |      |      |      |        |      |      |      |
|                                                         | Tumour > 1,0 cm in diameter                  | 10               | etter     |        |         |      |      |      |      |        |      |      |      |
|                                                         | Tumour > 1,5 cm in diameter                  | 18               | eprosion  |        |         |      |      |      |      |        |      |      |      |
|                                                         | Ulcerous tumour                              | 18               |           |        |         |      |      |      |      |        |      |      |      |
| Total:                                                  |                                              |                  |           |        |         |      |      |      |      |        |      |      |      |
| Comments, treatments etc:                               |                                              |                  |           |        |         |      |      |      |      |        |      |      |      |

0-3: Normal  
4-9: Pay attention to health state and consider treatment  
10-13: Pay close attention to health state, consider treatment or euthanasia  
14-18: Euthanasia \*Start treatment with antibiotics. If no effect within 3 days, euthanize the animal

23/7-17 520 p8 luden  
der tumoren  
sitzen  
30/7-19 520 p8 luden  
der tumoren  
sitzen



Supplementary figure 1-19-6. Mouse and xenograft growth curves

Weight curve

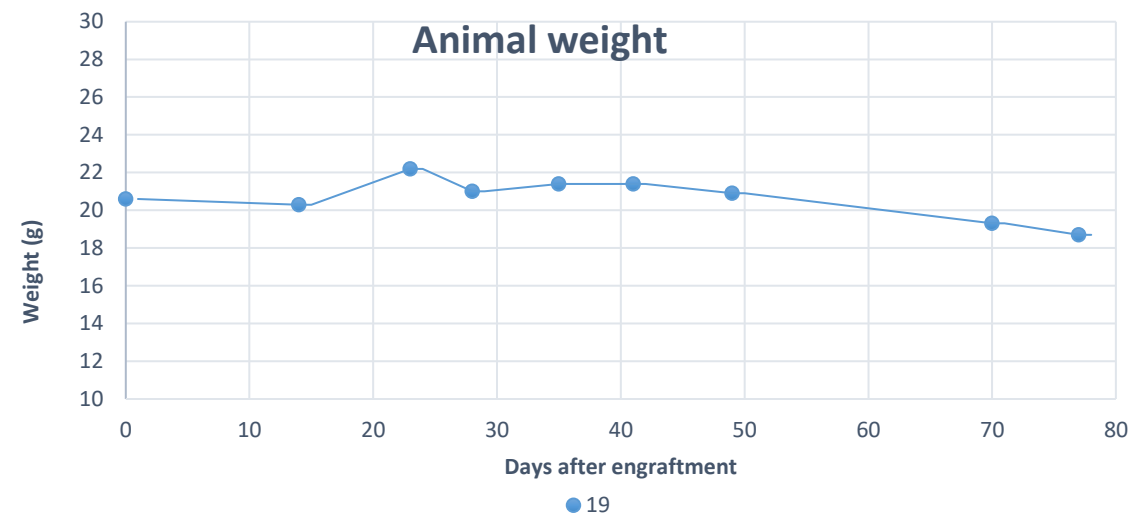

Xenograft growth curve

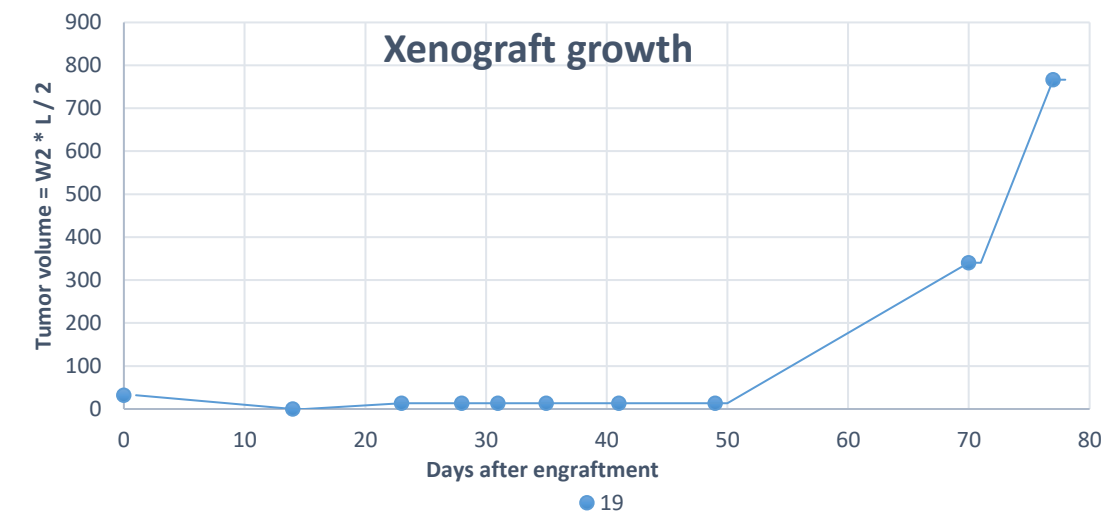

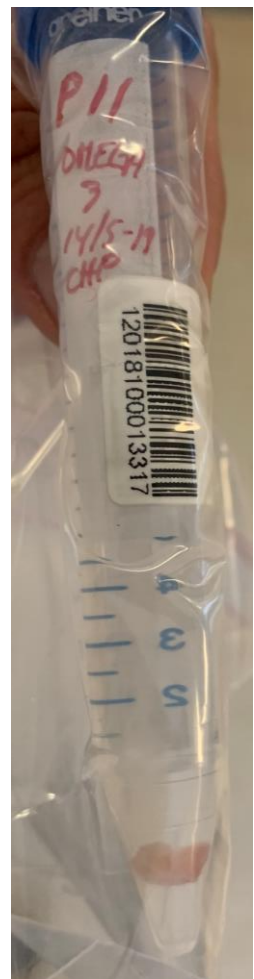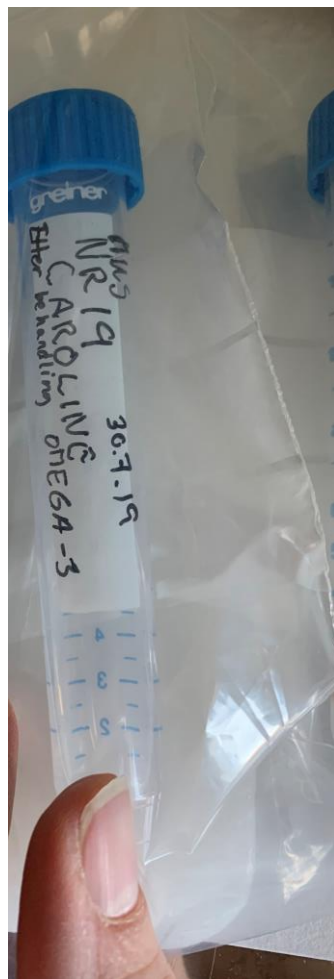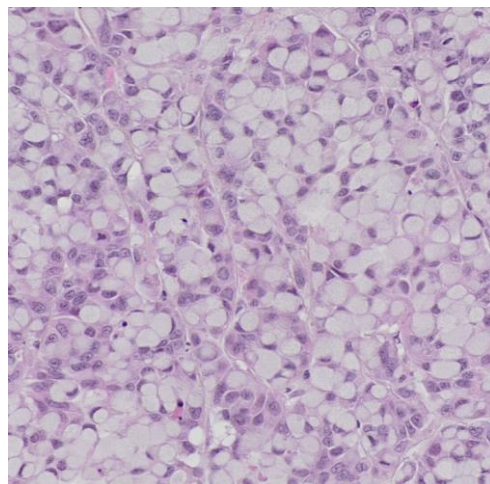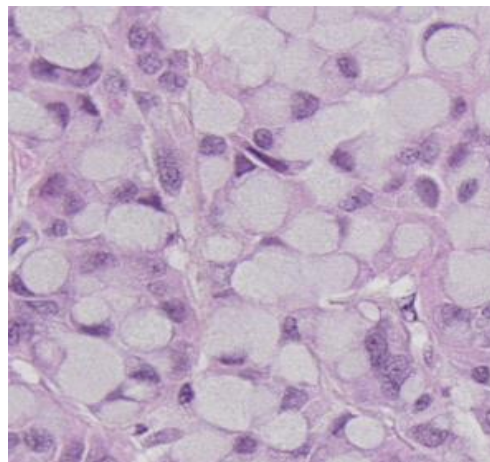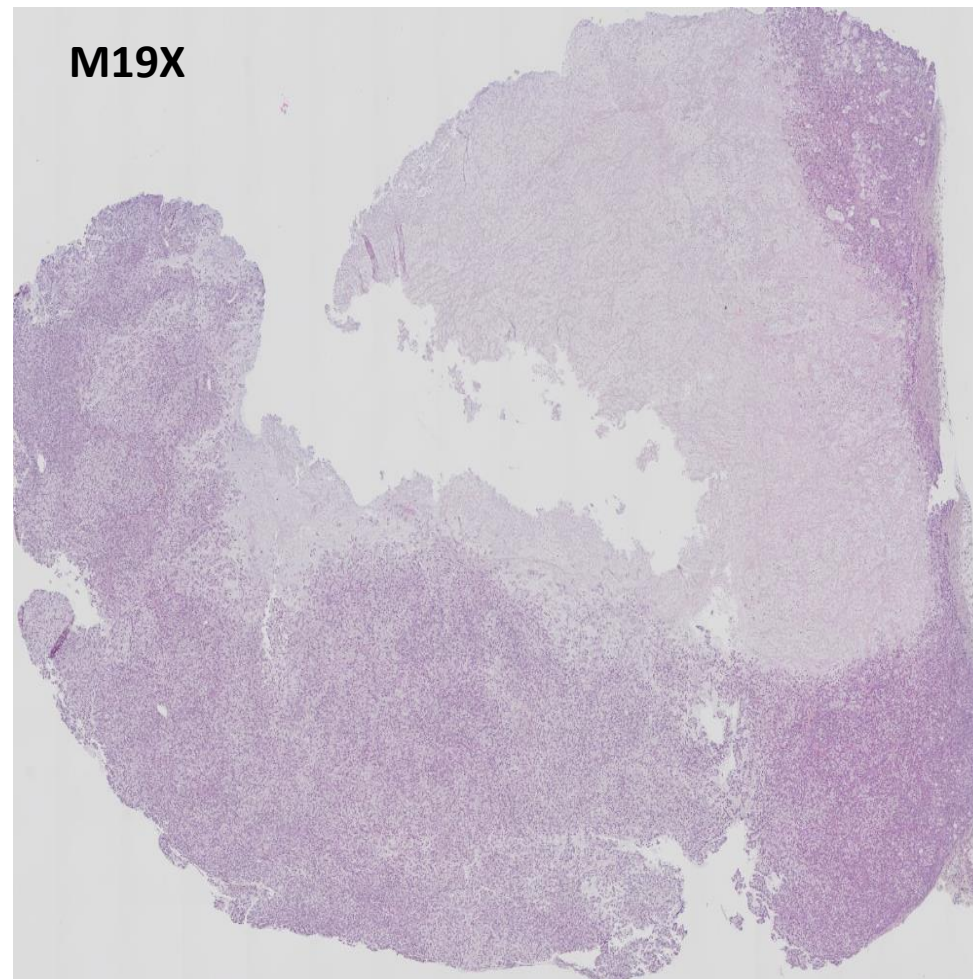

- Signet ring cells
- Signet ring cell adenocarcinoma
- Some necrosis



## Mouse 20

- Surgery date: 14.5.19
  - Age (weeks) 17
  - Weight (g) 24.0
  - Tumor fragment P11-1B
  - Fragment size 4\*4
  - Ear marks 2

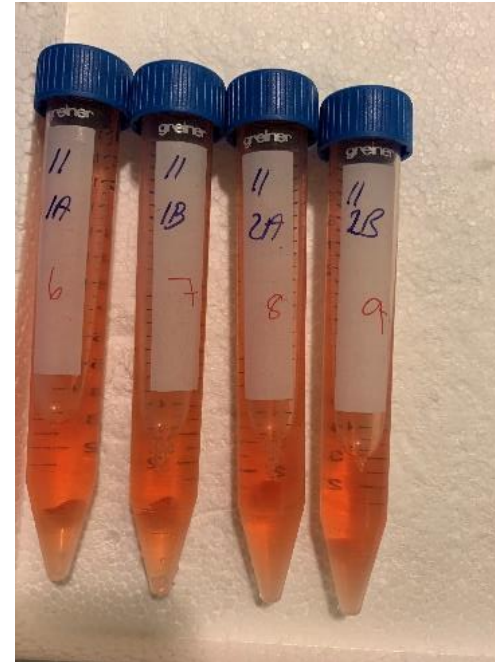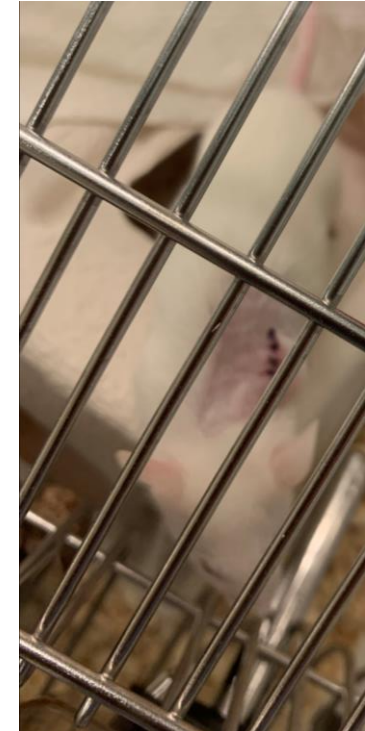

**Supplementary figure 1-20-1.** Pictures from the engraftment day

**Supplementary figure 1-20-2.** Pictures from follow up (14.06.19)

- the day before treatment start

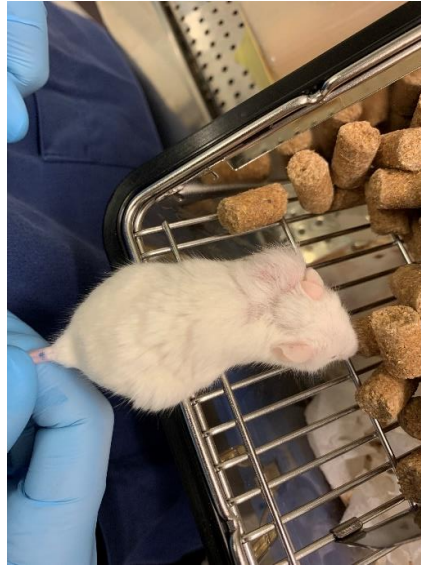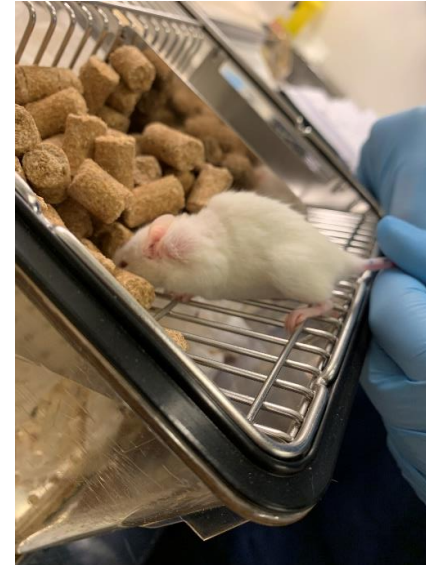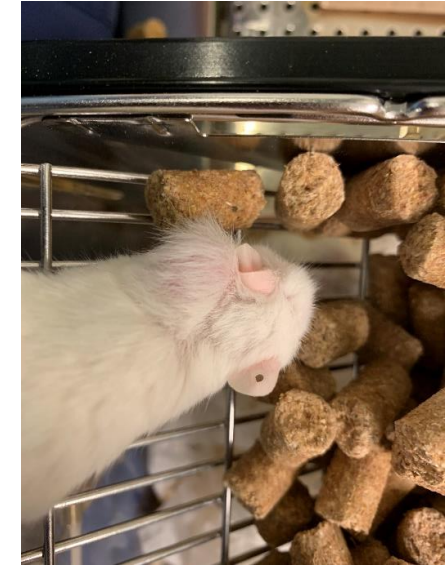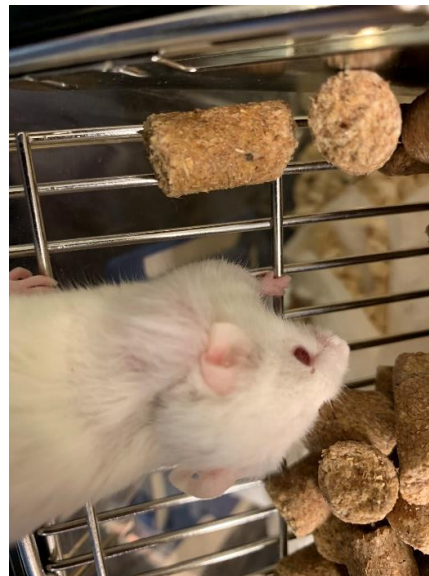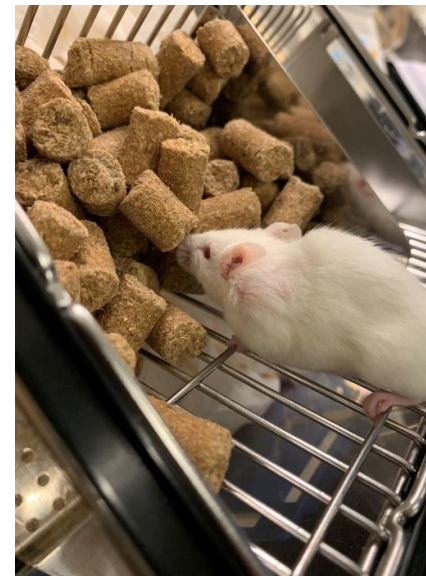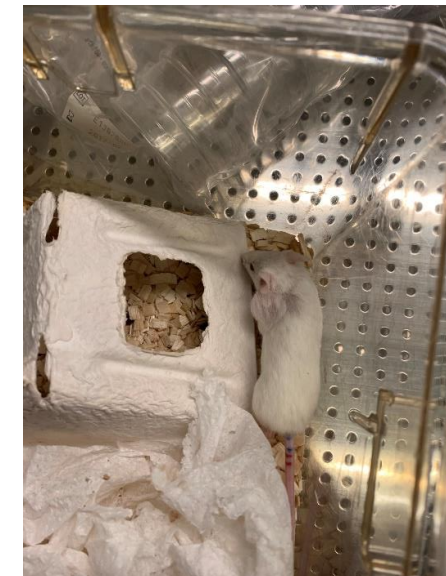



## Blood sample and treatment

- Before: Vena Saphena 11.06.19
  - Hard to get blood sample from
- After: Heart
- Treatment: Placebo

PLACEBO BUR 16

Vekt m/ drikkeløse og tut

Antall gram per flaske før og etter 7 timer

|            | Weight (g) |       | ID mus | ID mus | ID mus | ID mus | ID mus | ID mus |
|------------|------------|-------|--------|--------|--------|--------|--------|--------|
|            | Start      | End   |        |        |        |        |        |        |
|            | 08.00      | 15.00 |        |        |        |        |        |        |
| 05.06.2019 |            |       |        |        |        |        |        |        |
| 06.06.2019 | 131,6      | 126,3 | 15     |        |        |        |        |        |
| 07.06.2019 | 129,0      | 122,6 |        |        |        |        |        |        |
| 10.06.2019 | —          |       |        |        |        |        |        |        |
| 11.06.2019 | 136,4      | 127,7 |        | 20     |        |        |        |        |
| 12.06.2019 | 134,3      | 124,4 |        |        |        |        |        |        |
| 13.06.2019 | 133,2      | 121,2 |        |        |        |        |        |        |
| 14.06.2019 | 132,4      | 121,0 |        |        |        |        |        |        |
| 17.06.2019 | 135,1      | 125,1 |        |        |        |        |        |        |
| 18.06.2019 | 133,6      | 125,2 |        |        |        |        |        |        |
| 19.06.2019 | 135,0      | 119,2 |        |        |        |        |        |        |
| 20.06.2019 | 134,2      | 116,8 |        |        |        |        |        |        |
| 21.06.2019 | 133,9      | 121,1 |        |        |        |        |        |        |
| 24.06.2019 | 133,2      | 121,6 |        |        |        |        |        |        |
| 25.06.2019 | 131,1      |       |        |        |        |        |        |        |
| 26.06.2019 |            |       |        |        |        |        |        |        |
| 27.06.2019 |            |       |        |        |        |        |        |        |
| 28.06.2019 |            |       |        |        |        |        |        |        |
| 01.07.2019 |            |       |        |        |        |        |        |        |

Start muggsepp i buret!

**Supplementary figure 1-20-3.** List over weight registrations of the drinking bottle (with Placebo) before and after provided to the mice



## Supplementary figure 1-20-4. Pictures from euthanization

- Xenograft size 17 x 11.5
- Blood sample (blood card and plasma)
- Tumor tissue for
  - Histology
  - RNA isolation
  - Protein isolation

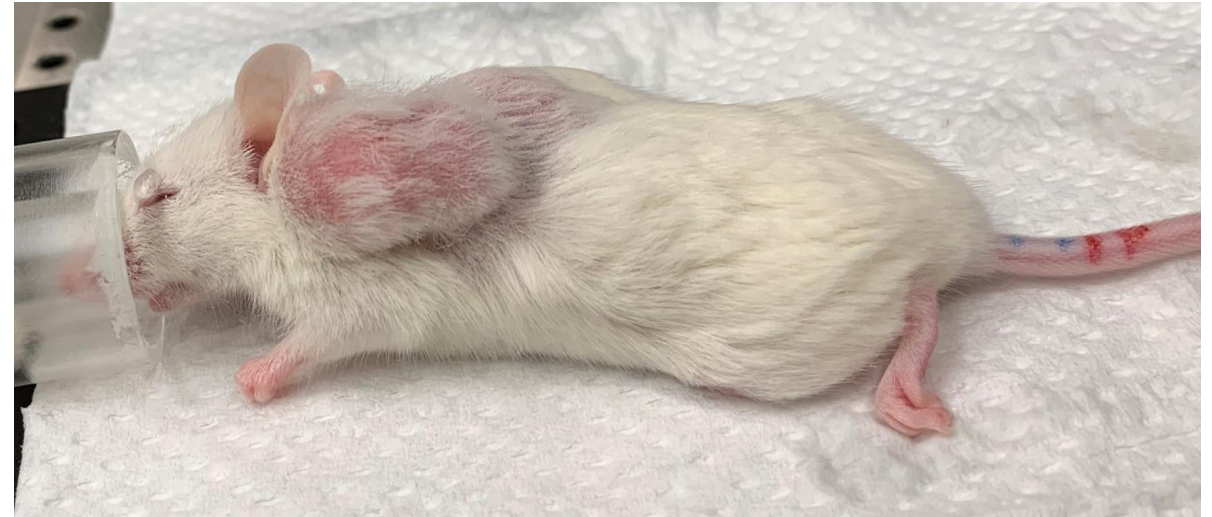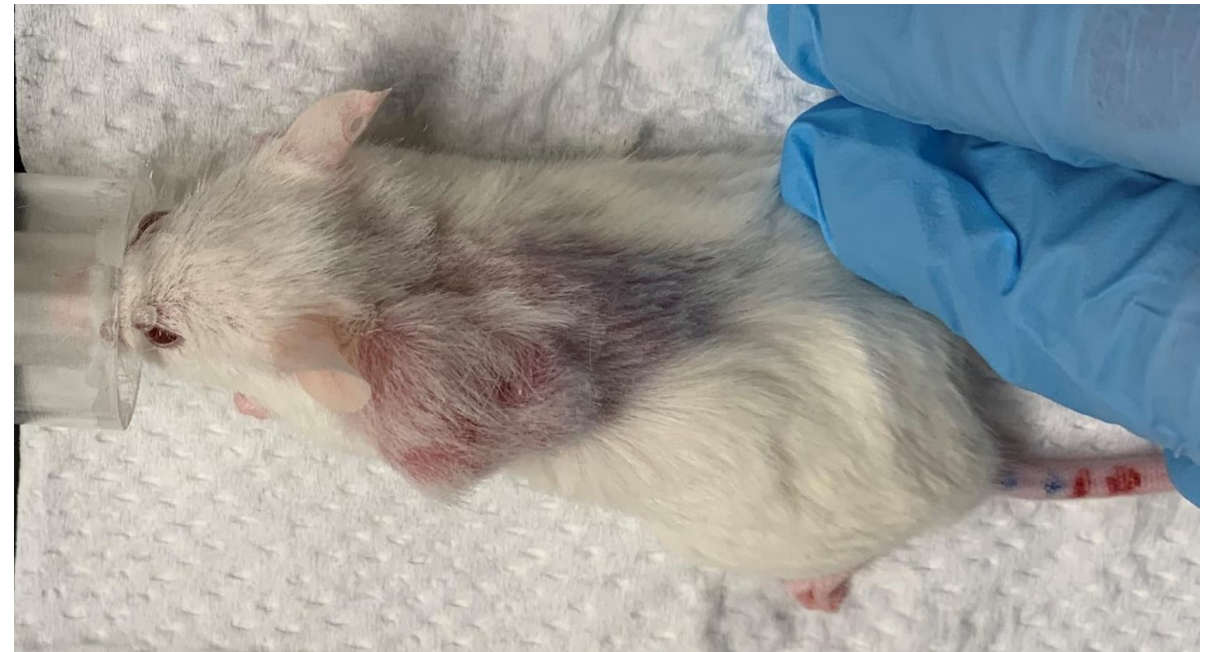

903<sup>TM</sup> Protein Saver Card

For Research Use Only  
Not for use in diagnostic procedures

Tuck Cover Here

Name Mus 20 Etter beh (P11 1B)

Date 25.06.19

CHP

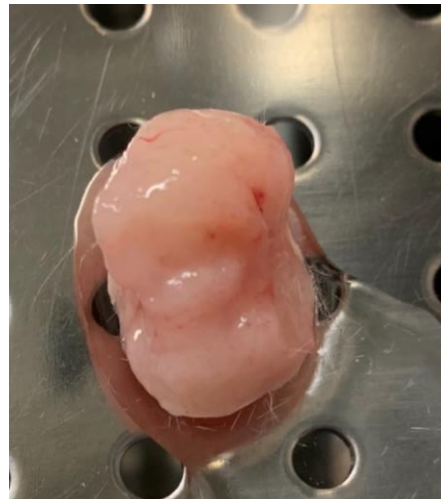

Supplementary figure 1-20-5. Picture of score sheet

 NTNU

Score sheet FOTS:  
Avdeling for komparativ medisin (AKM)

Responsible researcher: 99

Animal ID: P11-16  
2

0-3: Normal

4-9: Pay attention to health state and consider treatment

10-13: Pay close attention to health state, consider treatment or euthanasia

11

Supplementary figure 1-20-6. Mouse and xenograft growth curves

Weight curve

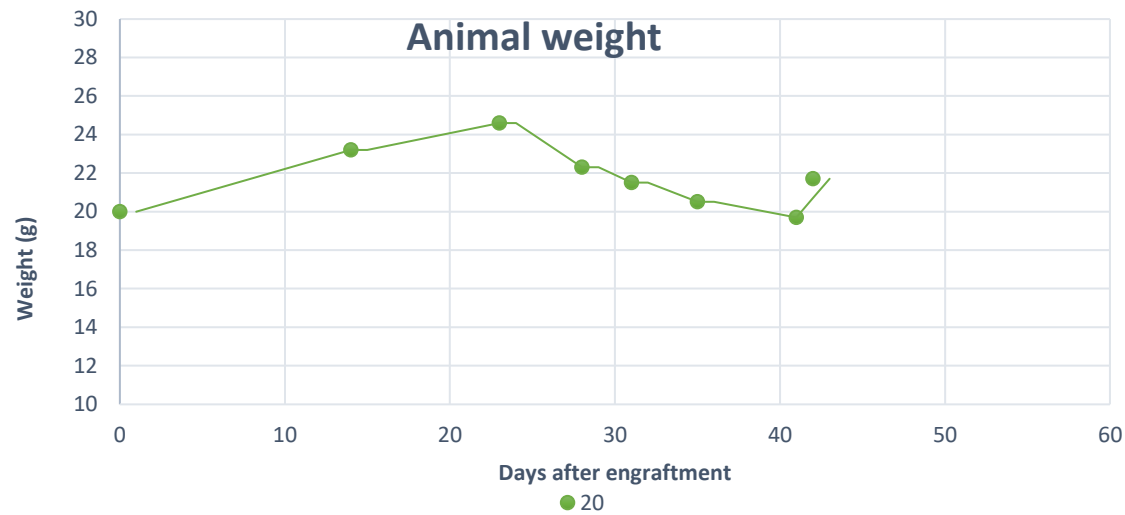

Xenograft growth curve

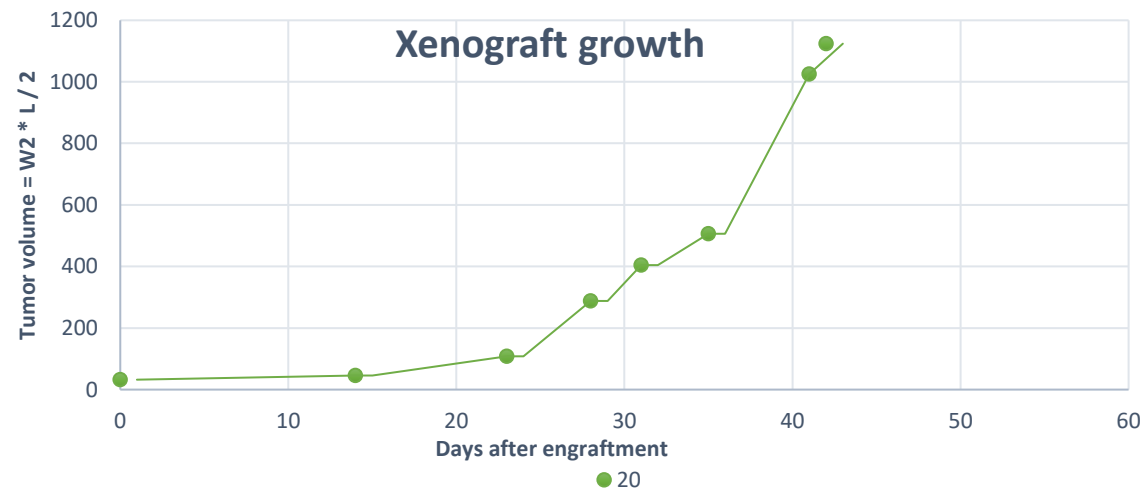



**Supplementary figure 1-20-7.**  
Histology pictures

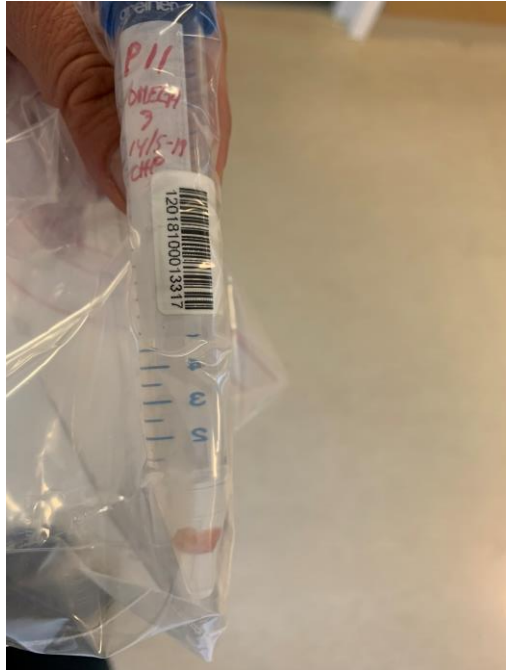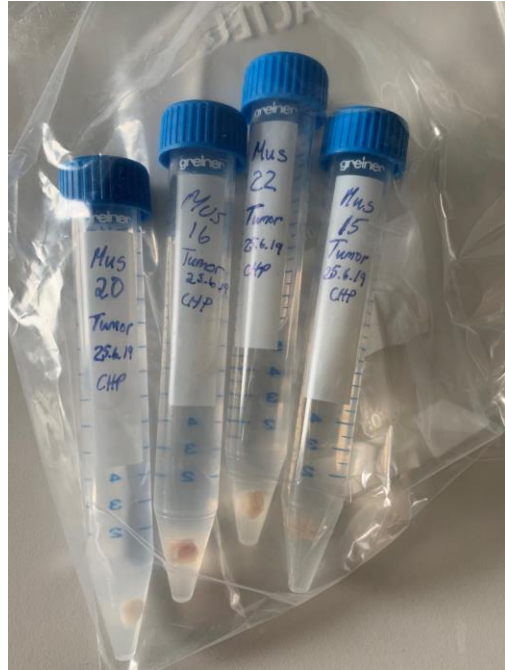

**M20X**

Page 47

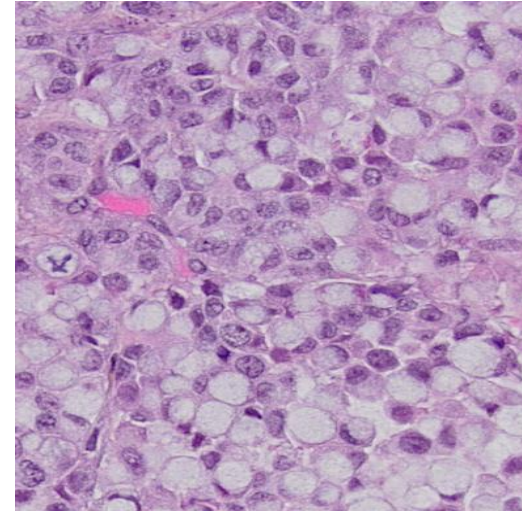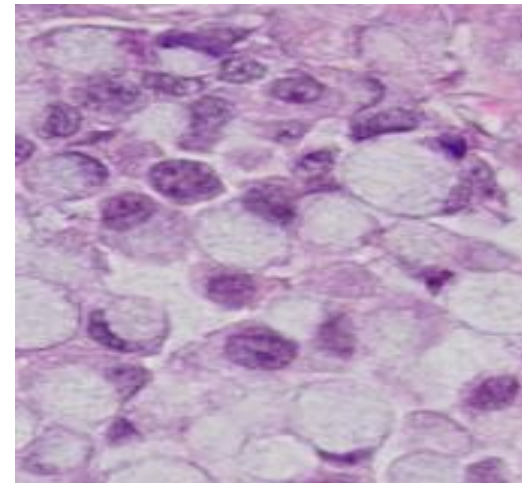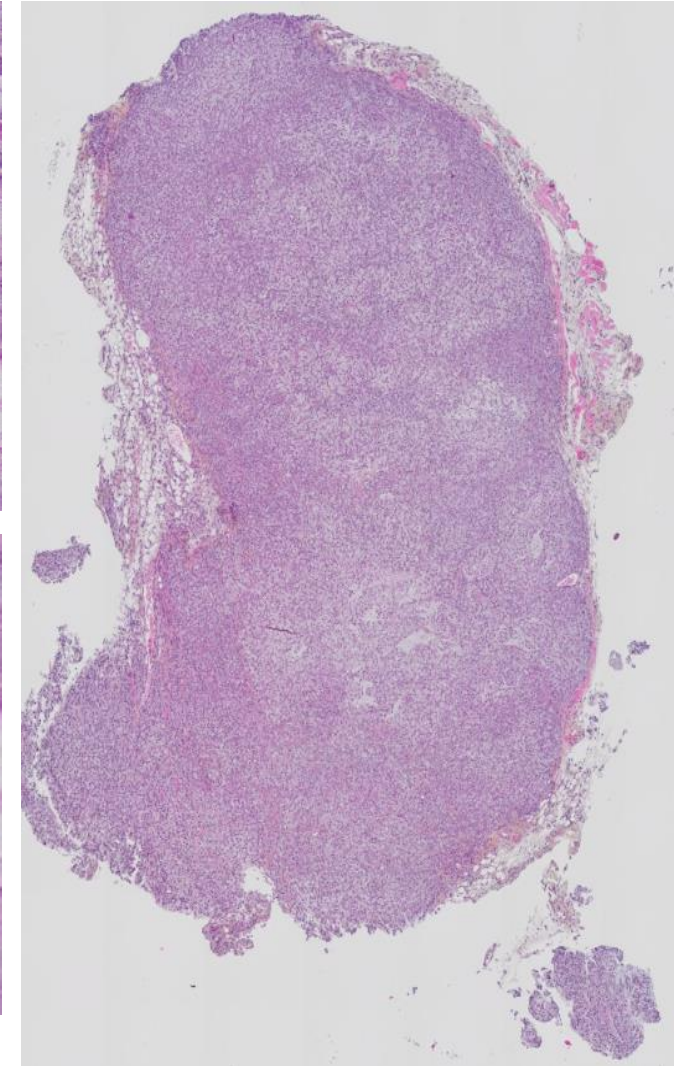

- Origin from signet ring cell adenocarcinoma
- Can see granulocytes in the blood veins getting attached to enter the tissue through the vein wall

## Mouse 21

- Surgery date: 14.5.19
  - Age (weeks) 17
  - Weight (g) 20.3
  - Tumor fragment P11-2A
  - Fragment size 4\*4
  - Ear marks 3

**Supplementary figure 1-21-1.** Pictures from the engraftment day

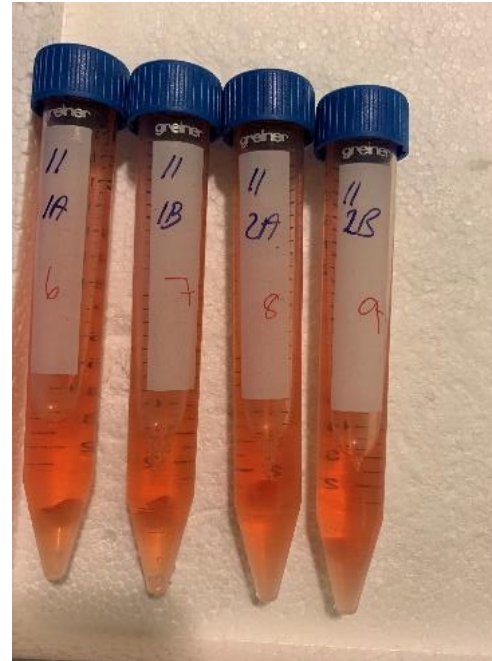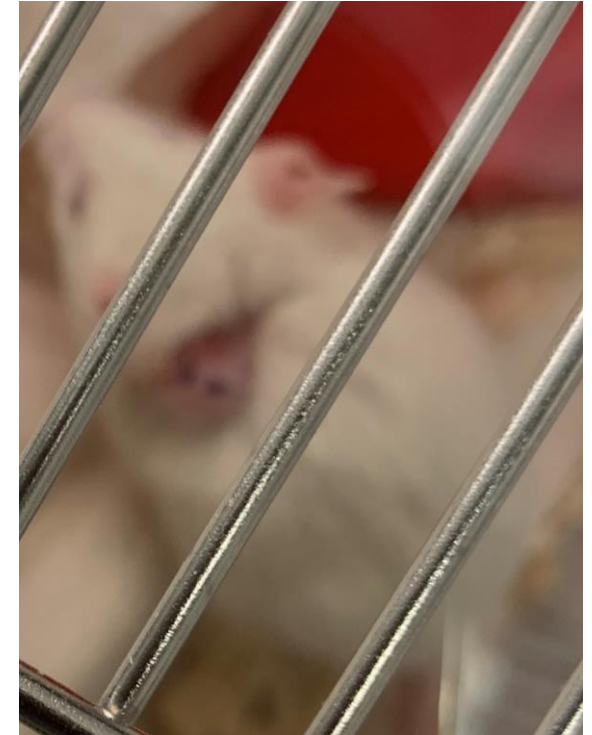



## Supplementary figure 1-21-2. Pictures from euthanization (07.08.19)

- Xenograft size 7x9 mm
  - Not registered until 06.08.19
- Reduced health and weight
- Tumor tissue not sampled
- No treatment given
- Low blood volume; could not take blood sample

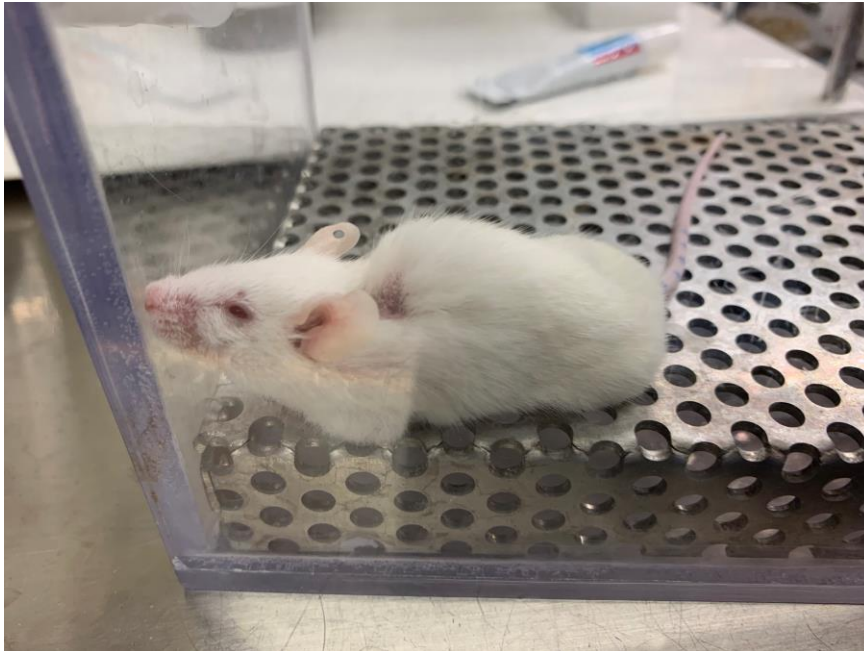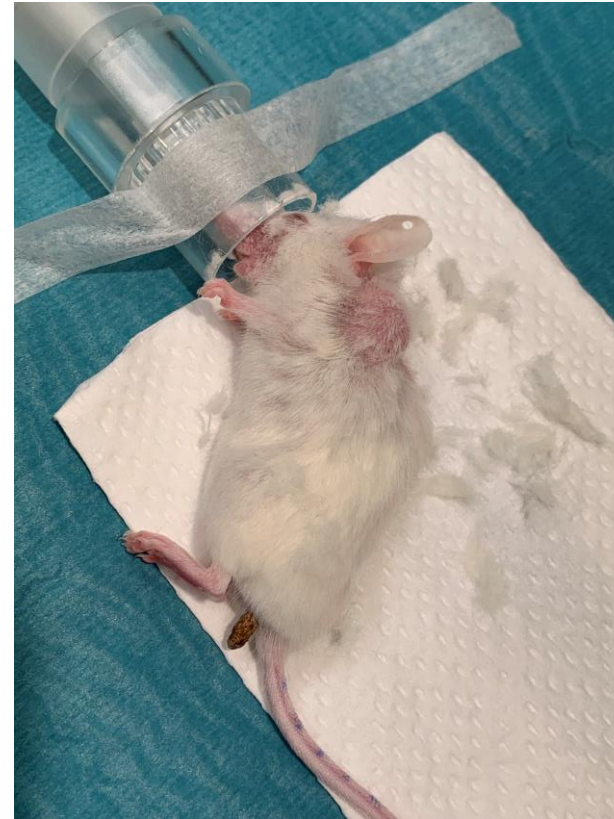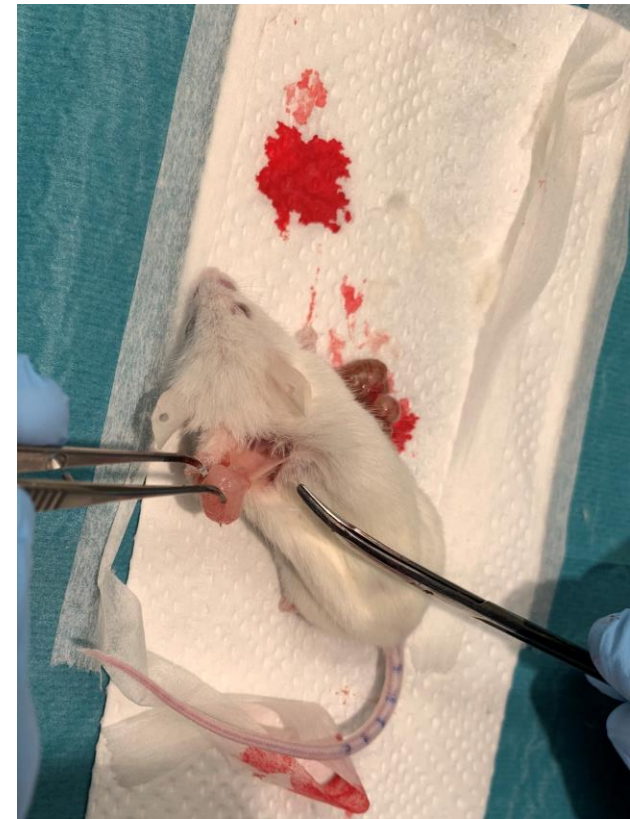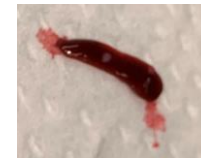

Normal spleen



### Supplementary figure 1-21-3. Pictures of score sheets

|                                                                                  |                                               | <b>NTNU</b>             |         | <b>Score sheet FOTS:</b> | <b>Responsible researcher:</b> | (P)  | <b>Animal ID:</b> | P 11-2a<br>3 | S pA<br>halen |                        |              |
|----------------------------------------------------------------------------------|-----------------------------------------------|-------------------------|---------|--------------------------|--------------------------------|------|-------------------|--------------|---------------|------------------------|--------------|
| <b>Parameter</b>                                                                 | <b>State</b>                                  | <b>Assessment scale</b> | Date    | Date                     | Date                           | Date | Date              | Date         | Date          | Date                   |              |
| <b>General appearance</b>                                                        | Normal                                        | 0                       | 28/5    | 6/6/19                   | 11/6-9                         | 14/8 | 18/6              | 24/6         | 027           | 6/8                    | 7/8          |
|                                                                                  | Reduced grooming                              | 1                       | 0       |                          |                                |      |                   |              | 0             |                        |              |
|                                                                                  | Minor distention of abdomen, rough hair coat  | 3                       |         |                          |                                |      |                   |              |               |                        |              |
|                                                                                  | Hunchback or distended abdomen, inactive      | 18                      |         |                          |                                |      |                   |              |               |                        |              |
| <b>Behaviour</b><br><small>(Level of activity)</small>                           | Normal                                        | 0                       | 0       |                          |                                |      |                   |              |               |                        |              |
|                                                                                  | Slightly reduced                              | 1                       |         |                          |                                |      |                   |              |               | 1-2                    |              |
|                                                                                  | Moderately reduced                            | 3                       |         |                          |                                |      |                   |              |               |                        |              |
|                                                                                  | Distressed behaviour due to growing tumour    | 3                       |         |                          |                                |      |                   |              | 0             |                        |              |
|                                                                                  | Obviously reduced                             | 5                       |         |                          |                                |      |                   |              |               |                        |              |
|                                                                                  | Isolated, inactive, lethargic                 | 18                      |         |                          |                                |      |                   |              |               |                        |              |
| <b>Body weight</b><br><small>(Compared to body weight before experiment)</small> | Body weight:                                  |                         | 21,1    | 21,9                     | 21,9                           |      | 21,9              | 21,4         | 21-3          | 18,6                   |              |
|                                                                                  | No loss                                       | 0                       | 0       |                          |                                |      |                   |              |               |                        |              |
|                                                                                  | Loss < 5%                                     | 1                       |         |                          |                                |      |                   |              |               |                        |              |
|                                                                                  | Loss 5-9 %                                    | 3                       |         |                          |                                |      |                   |              |               | acute neck velvet      |              |
|                                                                                  | Loss 10-14%                                   | 5                       |         |                          |                                |      |                   |              |               |                        |              |
|                                                                                  | Loss ≥ 15%                                    | 18                      |         |                          |                                |      |                   |              |               |                        |              |
| <b>Clinical signs</b><br><small>(Infection, bleeding, discoloration)</small>     | Normal                                        | 0                       | sor ogg | tymk                     | Lite wal                       | -1-  | -1-               | -1-          | -1-           | disting form           | disting form |
|                                                                                  | Minor irritation around surgical wound        | 1                       | npe au  | Rud                      | i sorompa                      |      |                   |              |               | tumor                  | Aubret.      |
|                                                                                  | Moderate irritation/infectious surgical wound | 3                       | dekar   | i mureld                 |                                |      |                   |              | caxx6         | Tumors                 |              |
|                                                                                  | Infectd/open surgical wound                   | 4 *                     | porkat  | sr ilia                  | Xenograft                      |      |                   |              | estmet        | maling obsemer i morgn | qX 7m        |
|                                                                                  | Tumour > 1,0 cm in diameter                   | 10                      | , Suret |                          |                                |      |                   |              |               |                        |              |
|                                                                                  | Tumour > 1,5 cm in diameter                   | 18                      |         |                          |                                |      |                   |              |               |                        |              |
|                                                                                  | Ulcerous tumour                               | 18                      |         |                          |                                |      |                   |              |               |                        |              |

Total: \_\_\_\_\_  
Comments, treatments etc: \_\_\_\_\_

0-3: Normal

Weight curve

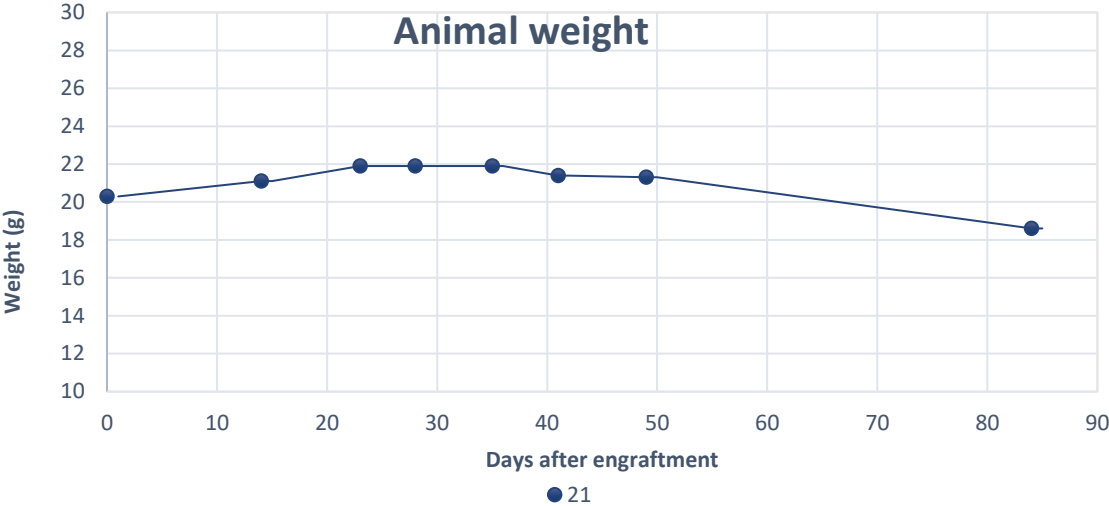

Xenograft growth curve

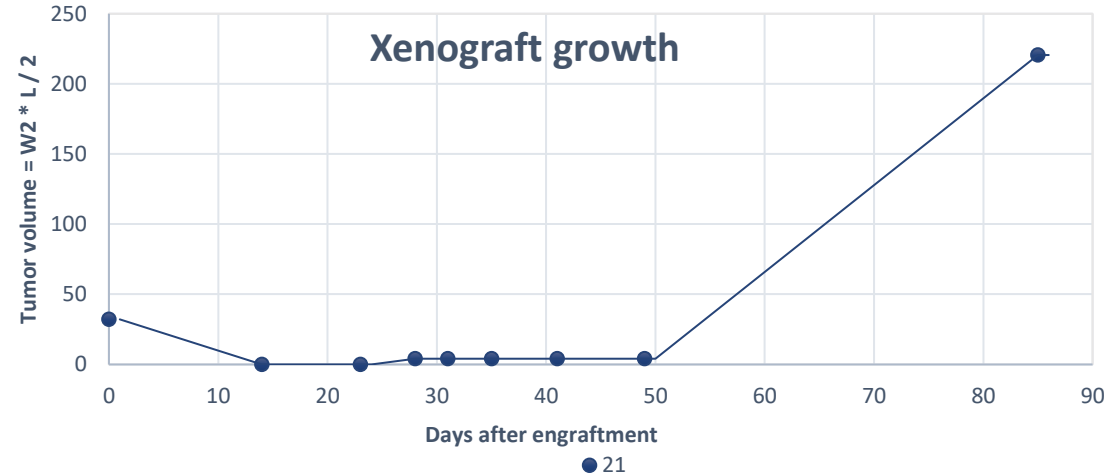

## Mouse 22

- Surgery date: 14.5.19
  - Age (weeks) 17
  - Weight (g) 21.2
  - Tumor fragment P11-2B
  - Fragment size 4\*4
  - Ear marks 4

**Supplementary figure 1-22-1.** Pictures from the engraftment day

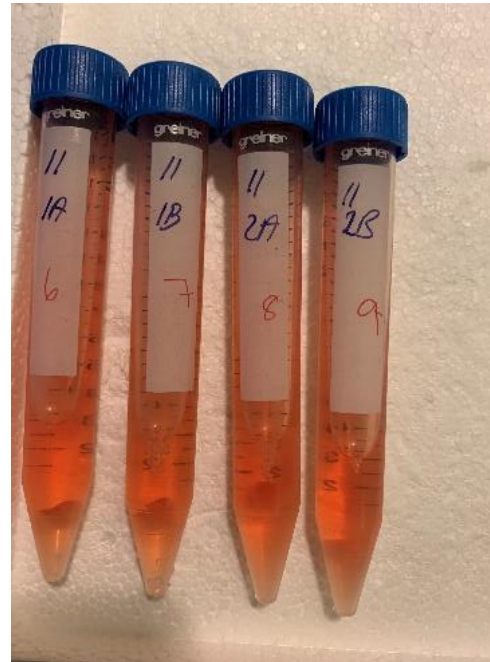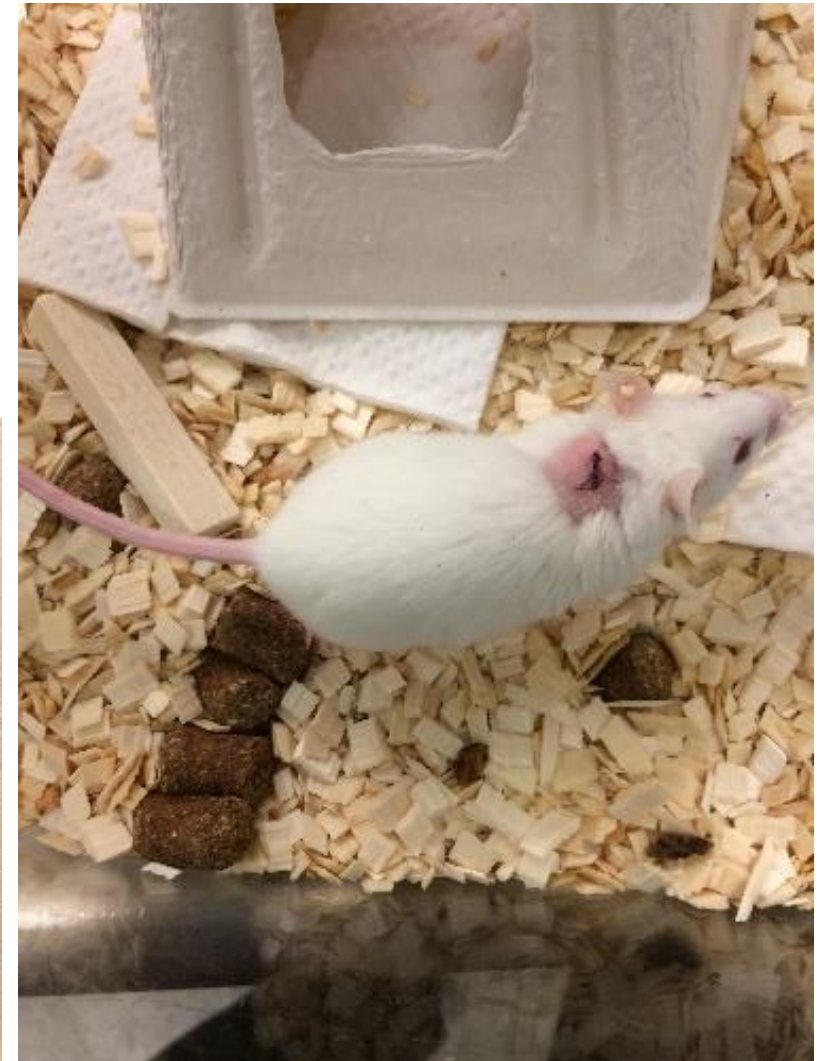



**Supplementary figure 1-22-2.** Pictures  
from follow up (14.06.19)

Page 53

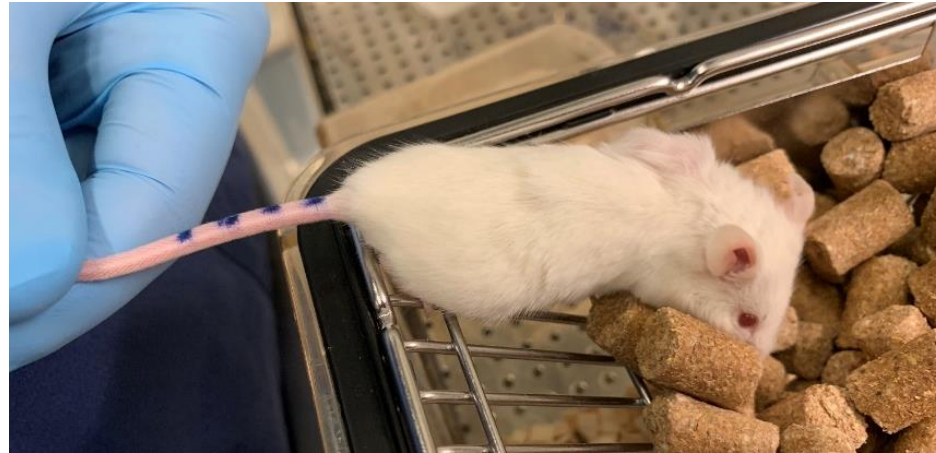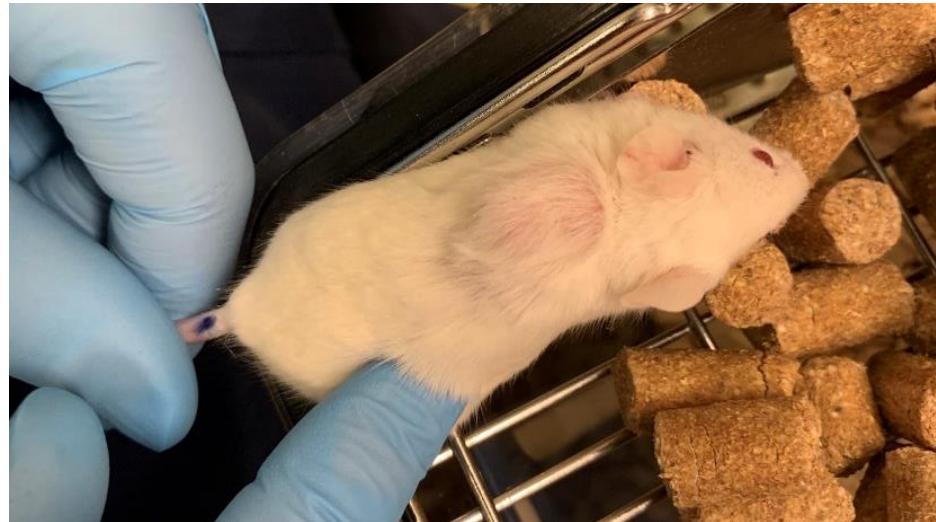

# Blood sample

- Before: Vena Saphena 11.06.19
  - Hard to get blood sample from
- After treatment: Heart
- Treatment: Smartfish with fishoil (OMEGA-3)

Smartfish - OMEGA3 - BUR 17

Antall gram per flaske før og etter 7 timer      Vekt m/drikke og tut

|            | Weight (g) |       | ID mus | ID mus | ID mus | ID mus | ID mus | ID mus |
|------------|------------|-------|--------|--------|--------|--------|--------|--------|
|            | Start      | End   |        |        |        |        |        |        |
| 05.06.2019 | 08.00      | 15.00 |        |        |        |        |        |        |
| 06.06.2019 | 134        | 128,3 | 16     |        |        |        |        |        |
| 07.06.2019 | 133,7      | 126,2 |        |        |        |        |        |        |
| 10.06.2019 | —          | —     |        |        |        |        |        |        |
| 11.06.2019 | 138,5      | 130   |        | 22     |        |        |        |        |
| 12.06.2019 | 138        | 132,8 |        |        |        |        |        |        |
| 13.06.2019 | 138,5      | 131,9 |        |        |        |        |        |        |
| 14.06.2019 | 142,5      | 134,6 |        |        |        |        |        |        |
| 17.06.2019 | 137,8      | 130,6 |        |        |        |        |        |        |
| 18.06.2019 | 137,4      | 129,0 |        |        |        |        |        |        |
| 19.06.2019 | 139,2      | 132,3 |        |        |        |        |        |        |
| 20.06.2019 | 138,8      | 131,6 |        |        |        |        |        |        |
| 21.06.2019 | 140,6      | 134,7 |        |        |        |        |        |        |
| 24.06.2019 | 139,1      | 130,5 |        |        |        |        |        |        |
| 25.06.2019 | 138,2      |       |        |        |        |        |        |        |
| 26.06.2019 |            |       |        |        |        |        |        |        |
| 27.06.2019 |            |       |        |        |        |        |        |        |
| 28.06.2019 |            |       |        |        |        |        |        |        |
| 01.07.2019 |            |       |        |        |        |        |        |        |
| 02.07.2019 |            |       |        |        |        |        |        |        |
| 03.07.2019 |            |       |        |        |        |        |        |        |

← Papiret  
kon bort  
flaska

**Supplementary figure 1-22-3.** List over weight registrations of the drinking bottle (with Smartfish Remune Peach) before and after provided to the mice



## Supplementary figure 1-22-4. Pictures from euthanization

- Xenograft size 17x11
- Blood sample (blood card and plasma)
- Tumor tissue for
  - Histology
  - RNA isolation
  - Protein isolation

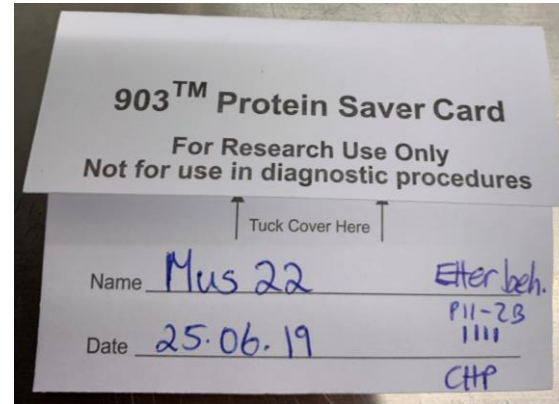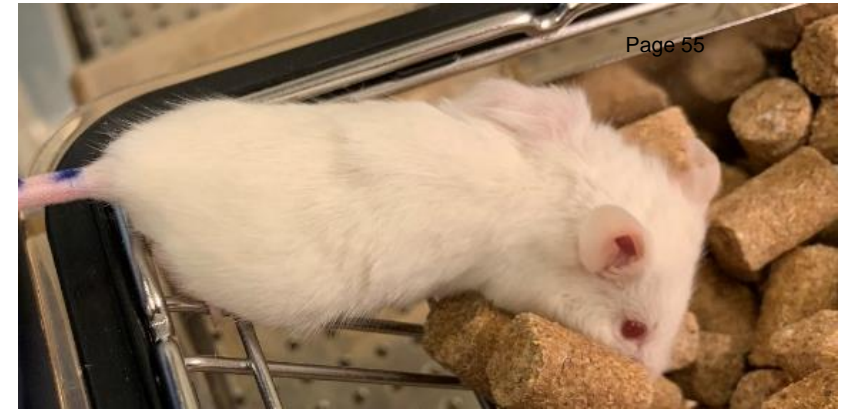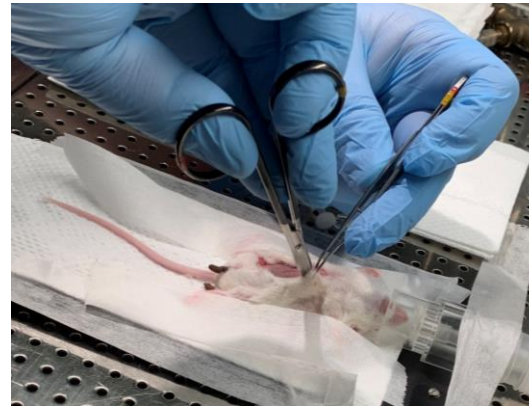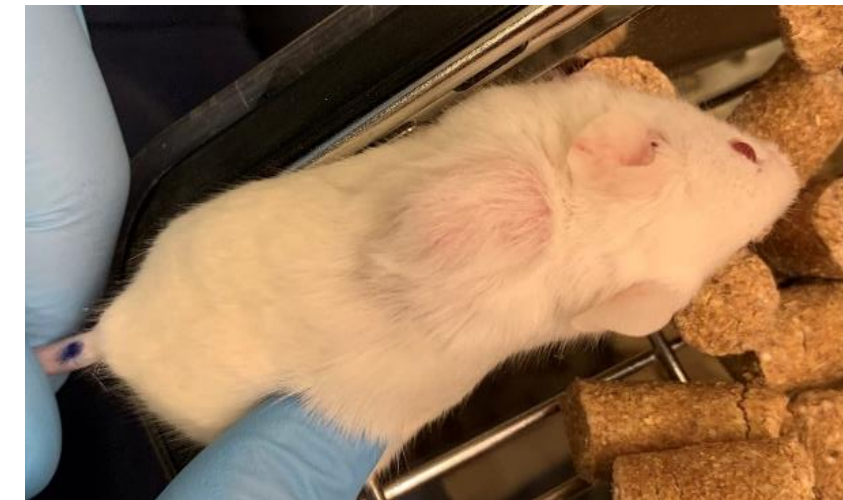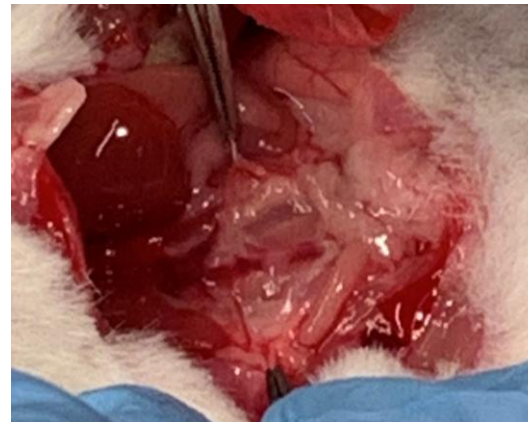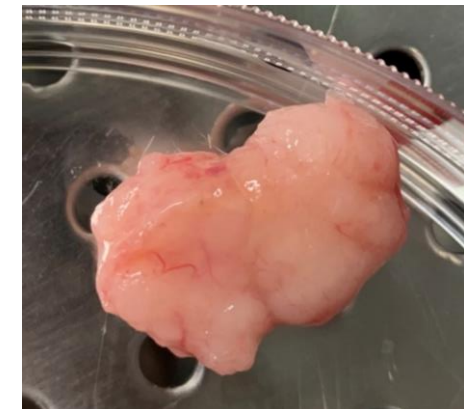



Supplementary figure 1-22-5. Picture of score sheet

 NTNU

Score sheet FOTS:  
Avdeling for komparativ medisin (AKM)

Responsible researcher: 22

Animal ID: P11-28  
4

0-3: Normal  
4-9: Pay attention to health state and consider treatment  
10-13: Pay close attention to health state, consider treatment or euthanasia

modul 1111

Supplementary figure 1-22-6. Mouse and xenograft growth curves

Weight curve

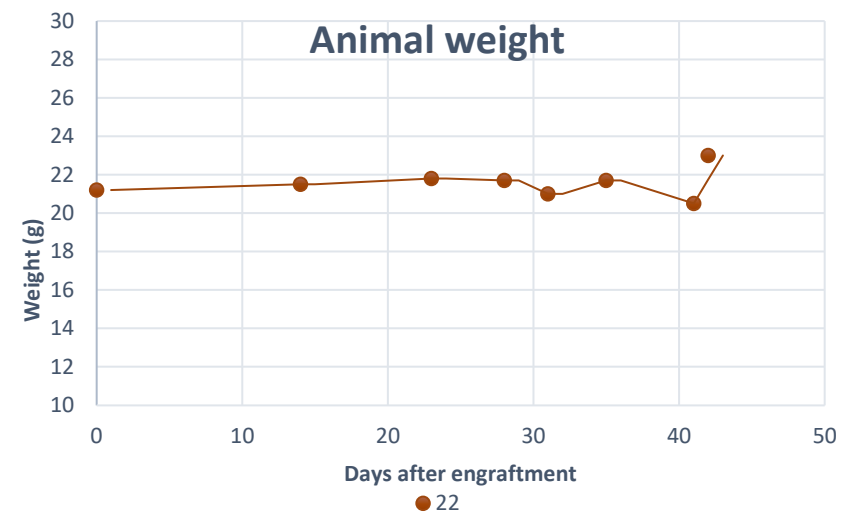

Xenograft growth curve

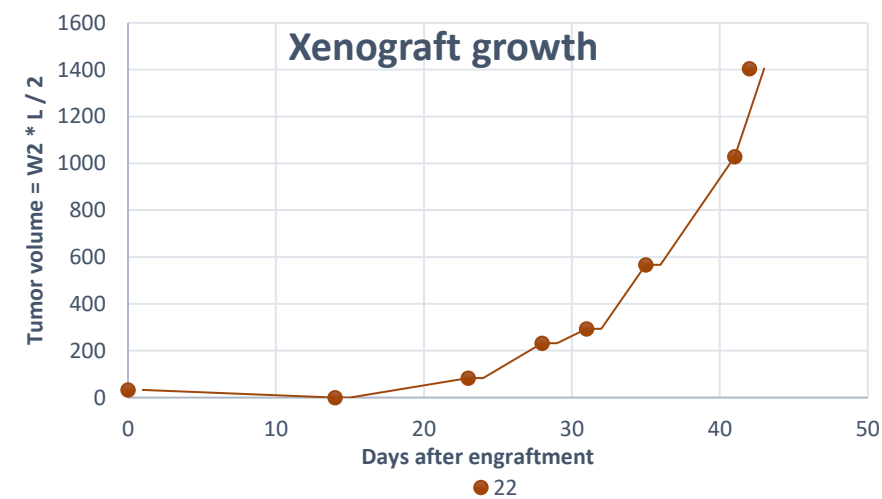

## Supplementary figure 1-22-7. Histology pictures

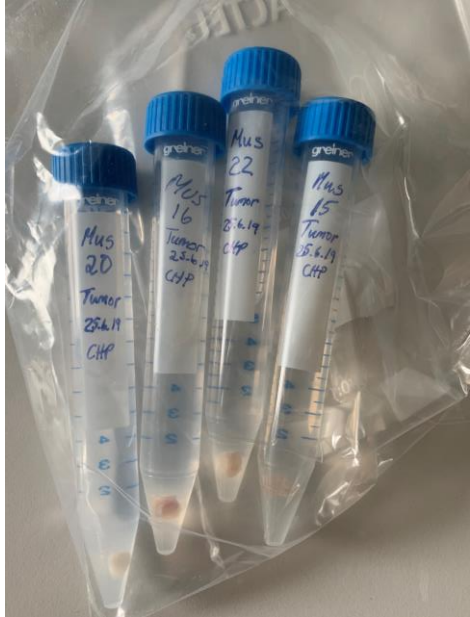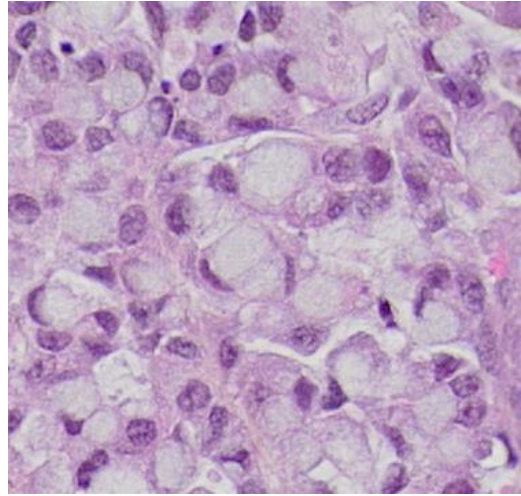

## M22X

Page 58

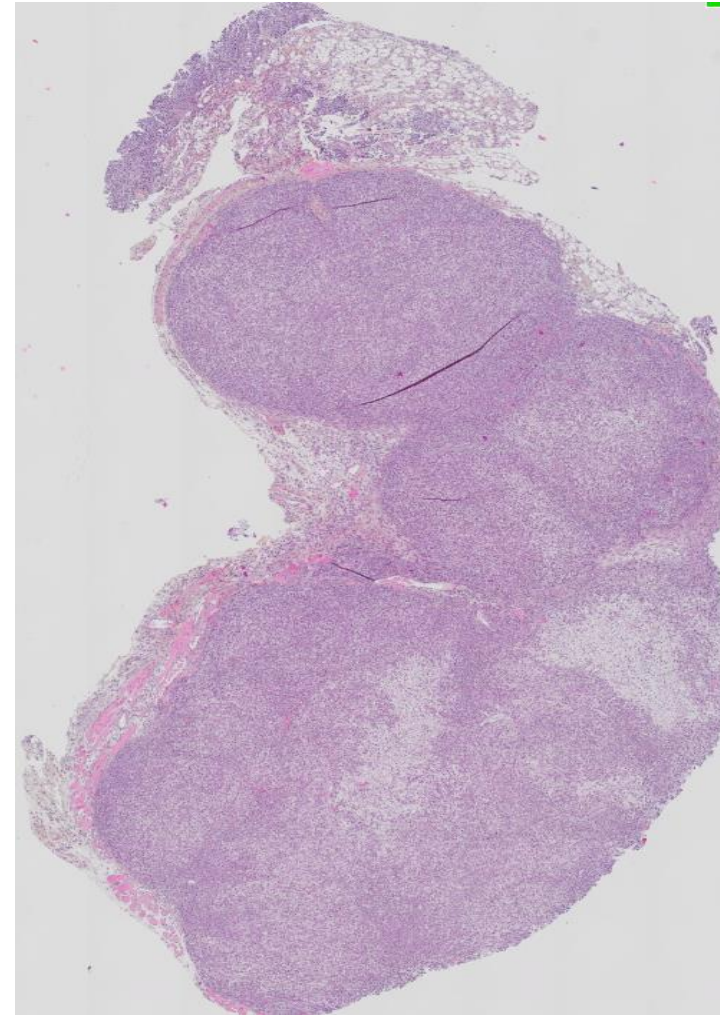

- Origin from signet ring cell adenocarcinoma
- Very simial to patient tumor 3
- Can see several mitotic cells, tumor tissue, connective tissue and some blood vains



## Mouse 23

- Surgery date: 20.08.19
  - Age (weeks) 31
  - Weight (g) 24
  - Tumor fragment P17-1A
  - Fragment size 3 x 3 mm
  - Ear mark 1
- Note; opened 2 stiches after 1 h → restitched

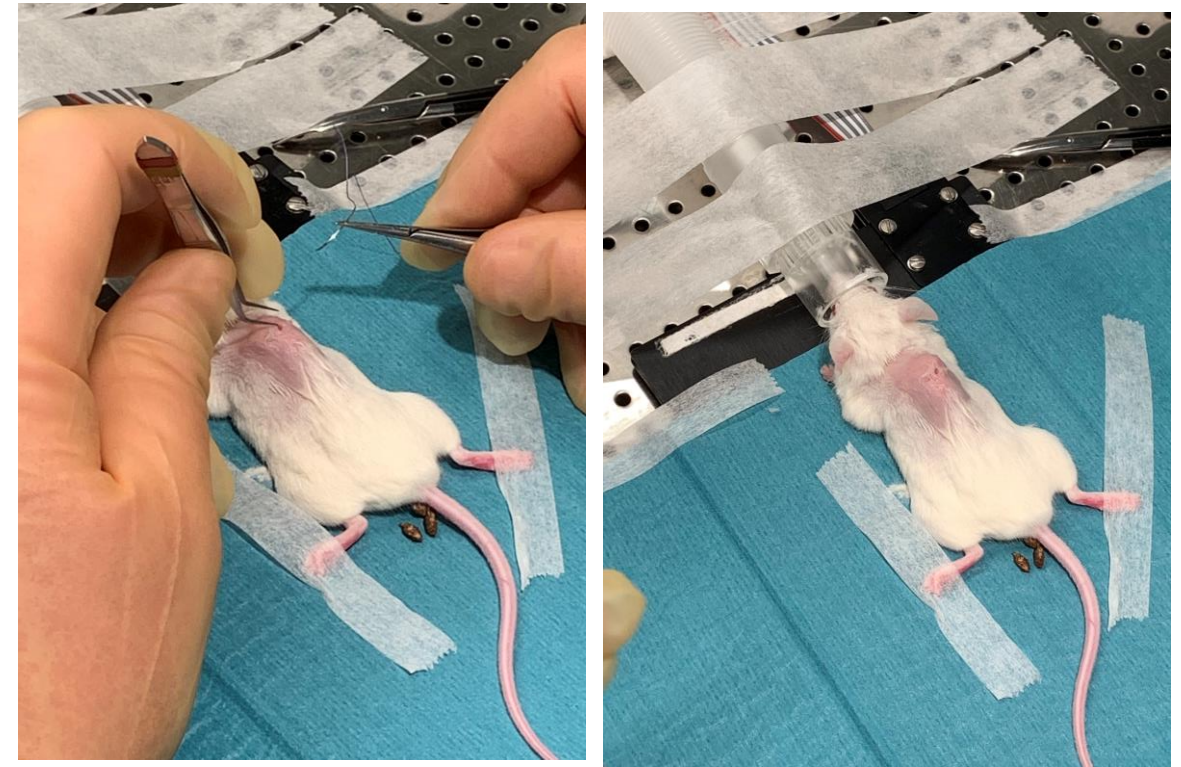

### Supplementary figure 1-23-1.

Pictures from the engraftment day

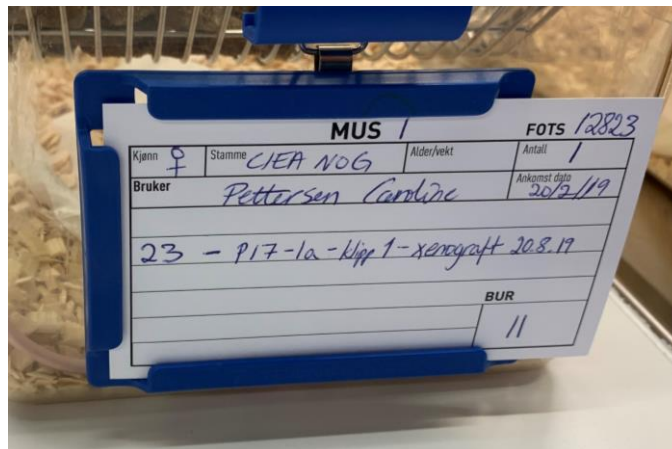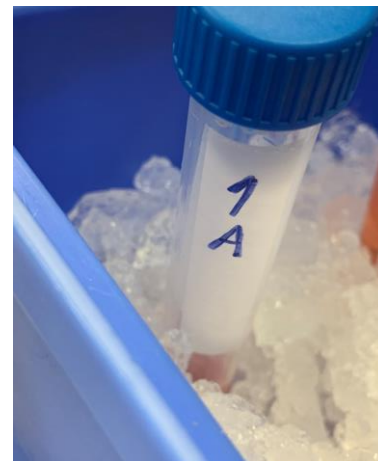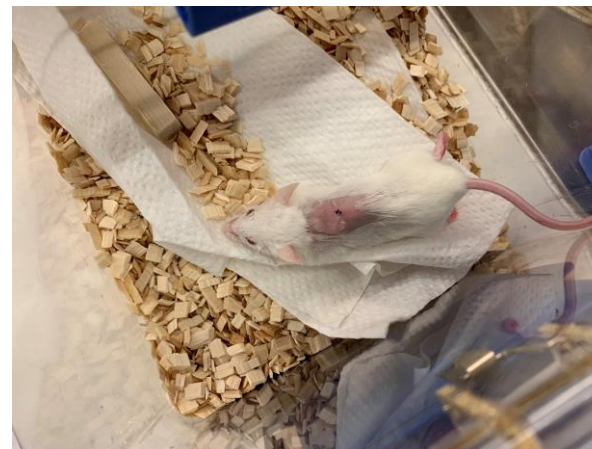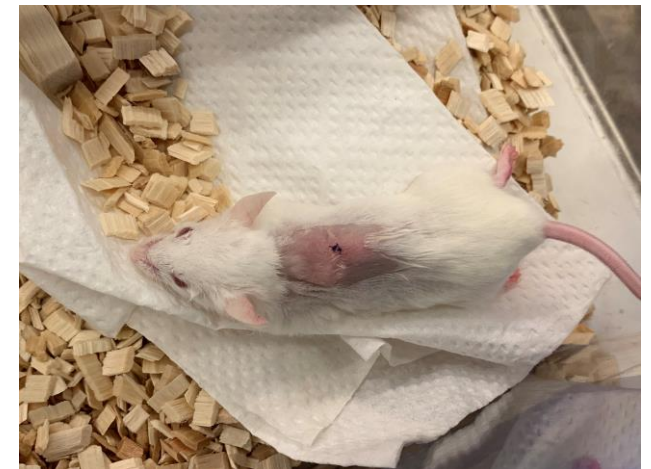



Supplementary figure 1-23-2. Pictures from follow up and tumor size measurement

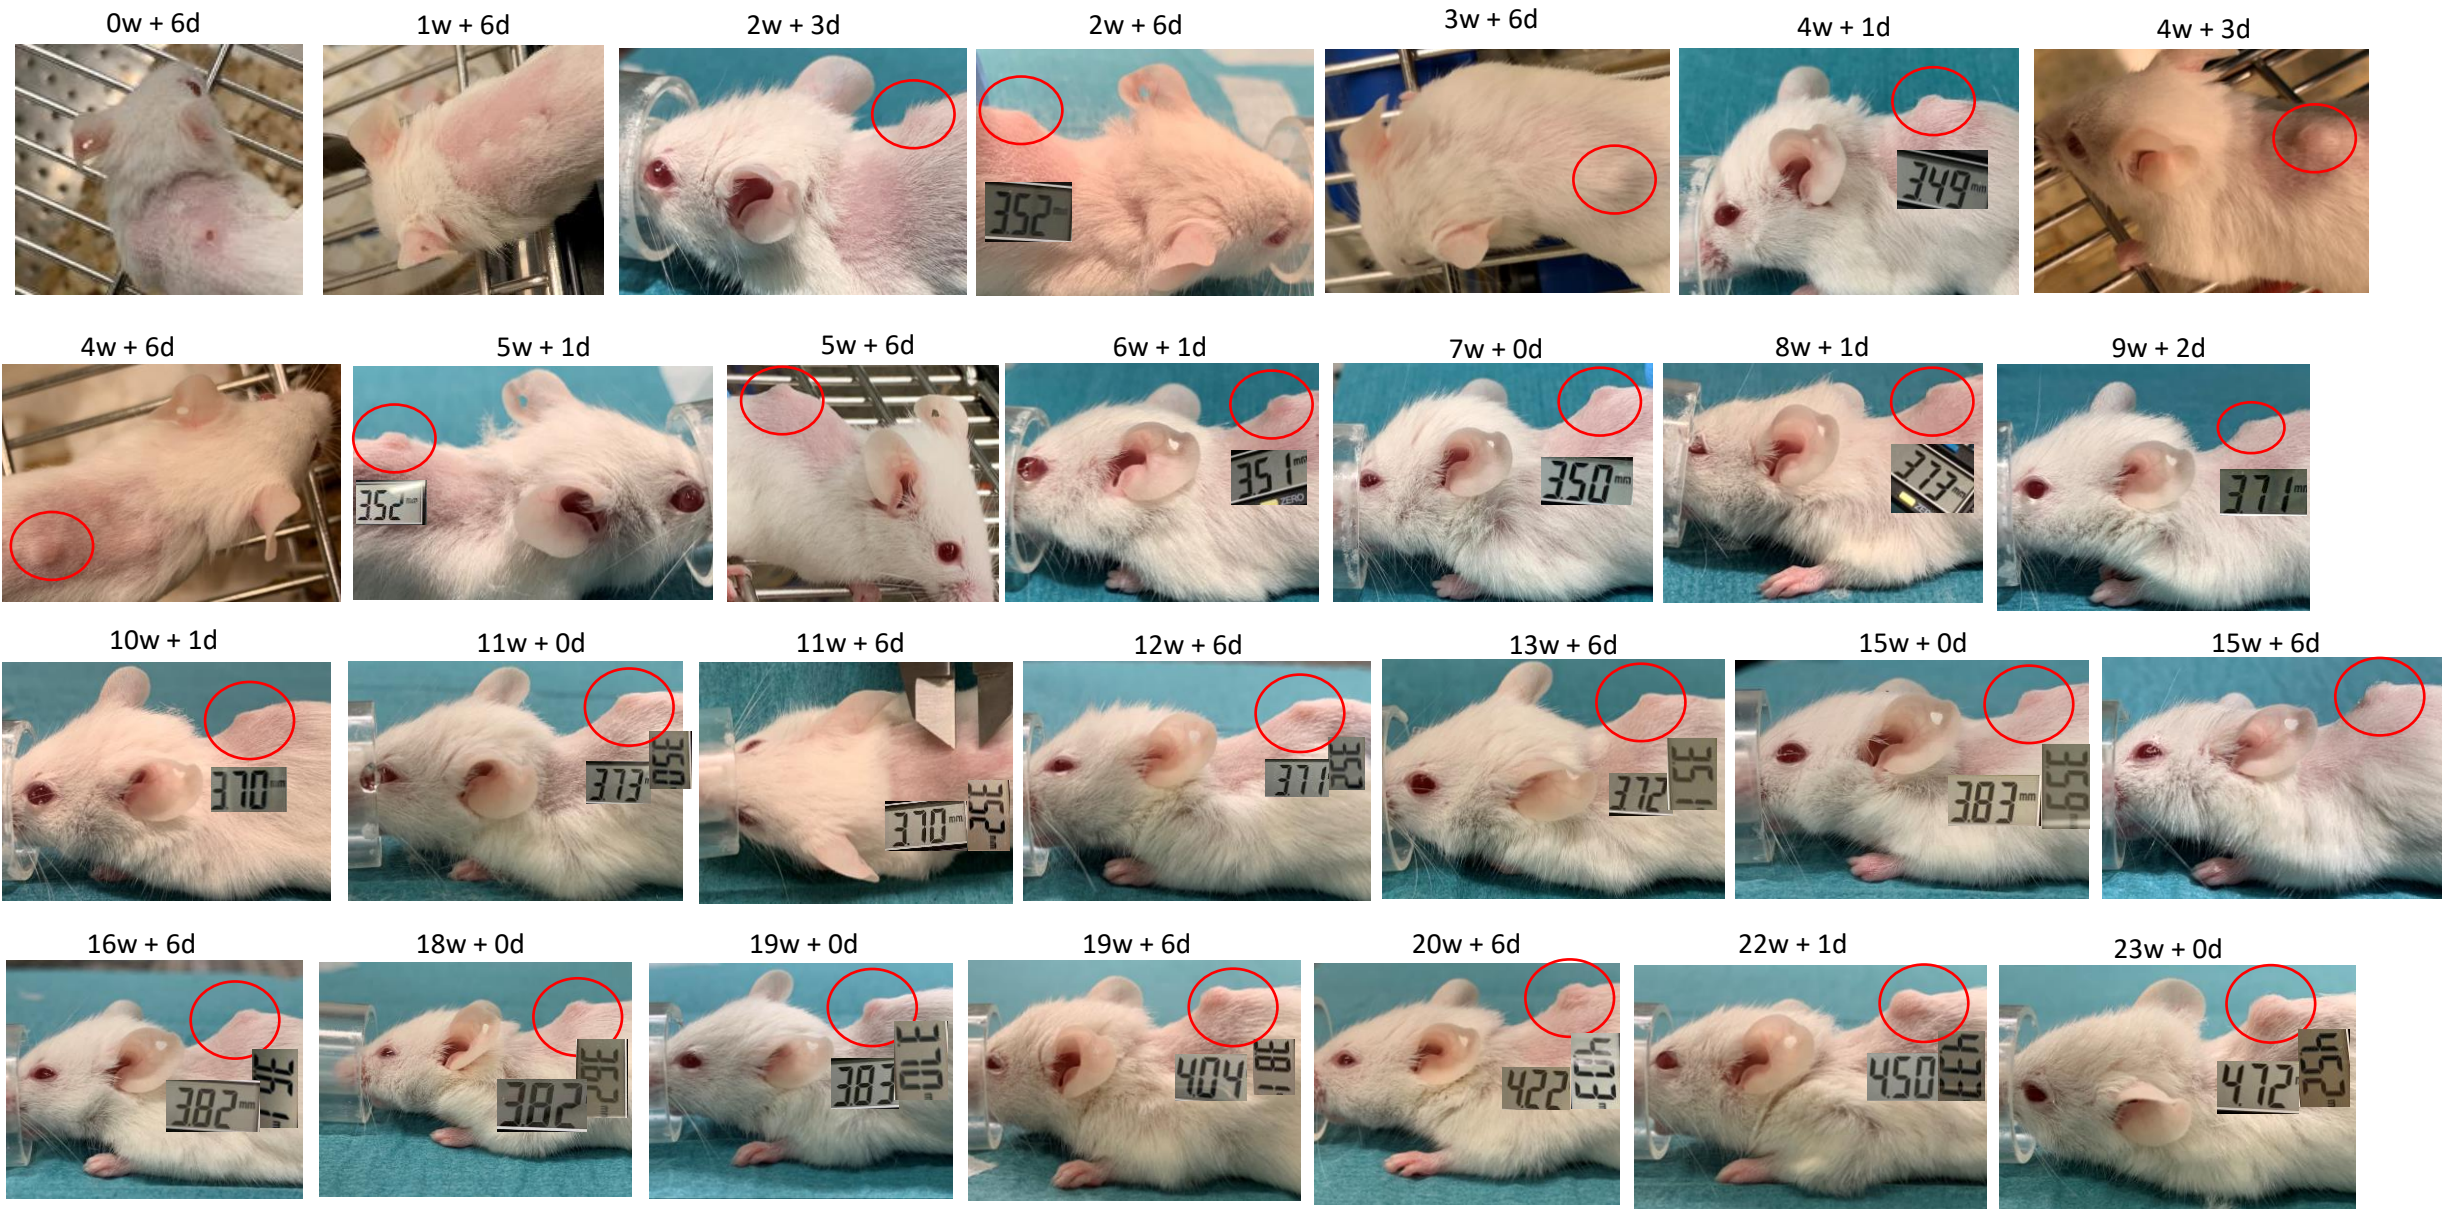







# Blood sample (24.02.2020)

- Xenograft 5\*5.1 mm
- Stable weight
- Little blood, anemic?, hard to get blood sample.
- Only 40 µl was spotted on blood card instead of 50 µl.
  - Not blood for preparing plasma
- Starting rectal prolaps? Red in the rectum opening.
- Placebo start 25.02.20

| MUS 1                                           |                 |            | FOTS 12823           |
|-------------------------------------------------|-----------------|------------|----------------------|
| Kjønn ♀                                         | Stamme CIEA NOG | Alder/vekt | Antall 1             |
| Bruker Pettersen Carline                        |                 |            | Ankomst dato 20/2/19 |
| <del>23 - P17-1a-klipp1-xenograft 20.8.19</del> |                 |            |                      |
| <del>24 - P17-1b-klipp2 -11-</del>              |                 |            |                      |
| <del>25 - P17-2a-klipp3 -11-</del>              |                 |            |                      |
| <del>26 - P17-2b-klipp4 -11-</del>              |                 |            |                      |
|                                                 |                 |            | BUR 11               |

| MUS                                  |                 |            | FOTS 12823           |
|--------------------------------------|-----------------|------------|----------------------|
| Kjønn ♀                              | Stamme CIEA NOG | Alder/vekt | Antall 1             |
| Bruker Pettersen Carline             |                 |            | Ankomst dato 20/2/19 |
| 23 - P17-1a-klipp1-xenograft 20.8.19 |                 |            |                      |
| Start PLACEBO 25.2.19                |                 |            |                      |
|                                      |                 |            | Bur 25               |

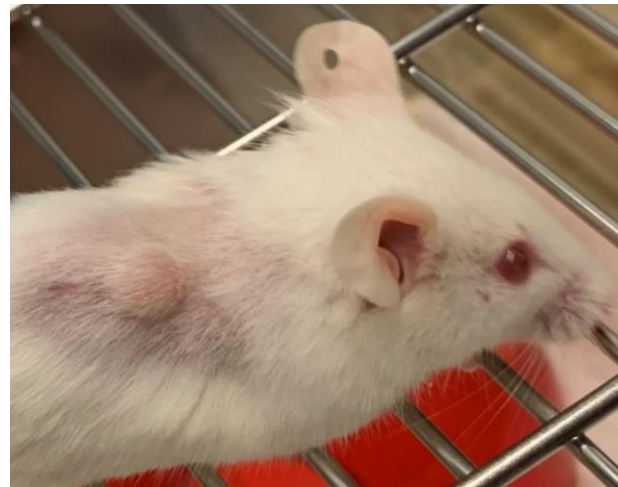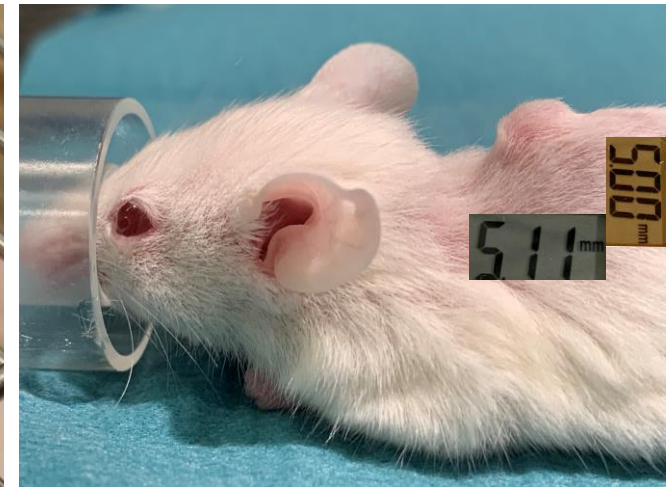

**Supplementary figure 1-23-3.** Pictures of mouse 23 at treatment startup

**Supplementary figure 1-23-4. A)** List over weight registrations of drinking bottle (with placebo) before and after provided to the mouse. **B)** Intake of placebo drink

- Placebo
- Treatment for 8 weeks
- Blood samples taken before/after treatment

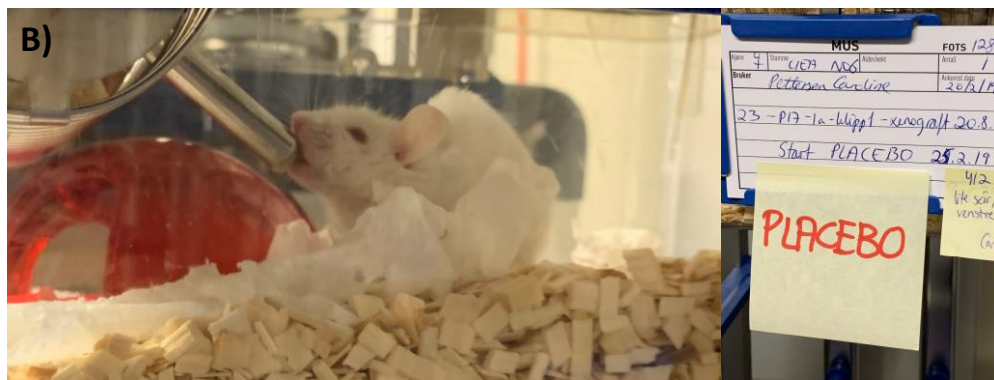

**A)**

Antall gram per flaske før og etter 7 timer

— Placebo —

Page 63

|            | Weight (g) |       | ID mus               | ID mus                   | ID mus | ID mus | ID m |
|------------|------------|-------|----------------------|--------------------------|--------|--------|------|
|            | Start      | End   |                      |                          |        |        |      |
|            | 08.00      | 15.00 |                      |                          |        |        |      |
| 25.02.2020 | 147,1      | 131,3 | (23)                 | mye lukkasje for flasken |        |        |      |
| 26.02.2020 | 147,0      | 128,8 |                      |                          |        |        |      |
| 27.02.2020 | 143,0      | 122,5 |                      |                          |        |        |      |
| 28.02.2020 | 148,6      | 129,8 |                      |                          |        |        |      |
| 02.03.2020 | 139,0      | 123,4 |                      |                          |        |        |      |
| 03.03.2020 | 144,6      | 119,7 |                      |                          |        |        |      |
| 04.03.2020 | 149,5      | 126,5 |                      |                          |        |        |      |
| 05.03.2020 | 148,5      | 125,9 |                      |                          |        |        |      |
| 06.03.2020 | 150        | 130,8 |                      |                          |        |        |      |
| 09.03.2020 | 142,3      | 126,3 |                      |                          |        |        |      |
| 10.03.2020 | 146,3      | 121,9 |                      |                          |        |        |      |
| 11.03.2020 | 146,9      | 122,3 |                      |                          |        |        |      |
| 12.03.2020 | 146,1      | 112,3 | støtt til 12.03.2020 |                          |        |        |      |
| 13.03.2020 |            |       |                      |                          |        |        |      |
| 16.03.2020 | 139,5      | 120,7 |                      |                          |        |        |      |
| 17.03.2020 | 148,2      | 122,2 |                      |                          |        |        |      |
| 18.03.2020 | 139,6      | 112,9 |                      |                          |        |        |      |
| 19.03.2020 | 140,8      | 118,9 | 07.00                | -14.00                   |        |        |      |
| 20.03.2020 | 142,0      | 121,8 | 07.00                | -14.00                   |        |        |      |
| 23.03.2020 | 136,6      | 123,6 |                      |                          |        |        |      |
| 24.03.2020 | 138,0      | 114,9 | 08.00                | -15.30                   |        |        |      |
| 25.03.2020 | 139,4      | 120,0 | 07.00                | -14.00                   |        |        |      |
| 26.03.2020 | 140,7      | 128,8 | 07.30                | 13.30                    |        |        |      |
| 27.03.2020 | 137,6      | 118,5 | 07.30                | 13.30                    |        |        |      |
| 30.03.2020 | 138,1      | 118,1 | 07.00                | 15.00                    |        |        |      |
| 31.03.2020 | 139,9      | 121,6 | 08.30                | 15.30                    |        |        |      |
| 01.04.2020 | 138,1      | 117,4 | 08.15                | 15.30                    |        |        |      |
| 02.04.2020 | 139,0      | 119,2 | 08.00                | 14.30                    |        |        |      |
| 03.04.2020 | 143,3      | 132,6 | 08.00                | 14.15                    |        |        |      |
| 06.04.2020 | 145,0      | 120,7 | 08.00                | 15.00                    |        |        |      |
| 07.04.2020 | 137,0      | 118   | 08.00                | 15.25                    |        |        |      |
| 08.04.2020 | 146,7      | 131,3 | 8.00                 | 12.00                    |        |        |      |
| 09.04.2020 | 144,3      | 136,7 | 08.15                | 12.40                    |        |        |      |
| 10.04.2020 | 133,2      | 128,1 | 09.15                | 13.00                    |        |        |      |
| 13.04.2020 | 137,6      | 130,0 | 07.30                | 12.30                    |        |        |      |
| 14.04.2020 | 131,6      | 122,6 | 07.00                | 15.15                    |        |        |      |
| 15.04.2020 | 136,6      | 131,3 | 9.20                 | 15.40                    |        |        |      |
| 16.04.2020 | 139,4      | 120,6 | 8.00                 | 15.10                    |        |        |      |
| 17.04.2020 | 140,0      | 127,2 | 07.00                | 14.00                    |        |        |      |
| 20.04.2020 |            |       |                      |                          |        |        |      |

| FOTS 12823                             |                    | MUS                                    |                    |
|----------------------------------------|--------------------|----------------------------------------|--------------------|
| Kjønn                                  | Stamme             | Stamme                                 | Stamme             |
| 4                                      | C1E7A N06          | C1E7A N06                              | C1E7A N06          |
| Bruker                                 | Bruker             | Bruker                                 | Bruker             |
| Pettersen Caroline                     | Pettersen Caroline | Pettersen Caroline                     | Pettersen Caroline |
| 23 - P17-1a-lupin1 - x-raygalt 20.8.19 |                    | 23 - P17-1a-lupin1 - x-raygalt 20.8.19 |                    |
| Start PLACEBO 25.2.19                  |                    | Start PLACEBO 25.2.19                  |                    |
| Bur 25                                 |                    | Bur 25                                 |                    |



## Supplementary figure 1-23-5.

### Pictures from euthanization

- Reduced weight
- Necroscopy
  - Xenograft size 5.9 x 5.8 mm
  - Secondary tumor size 7.07 x 9.01 mm
  - Blood sample
  - Tumor tissue for
    - Histology
    - RNA isolation
    - Protein isolation
  - Blood card 40  $\mu$ l

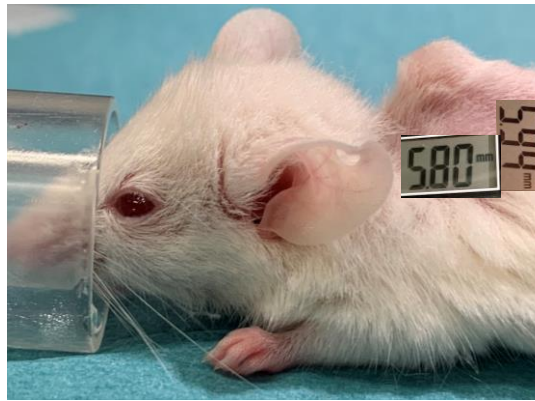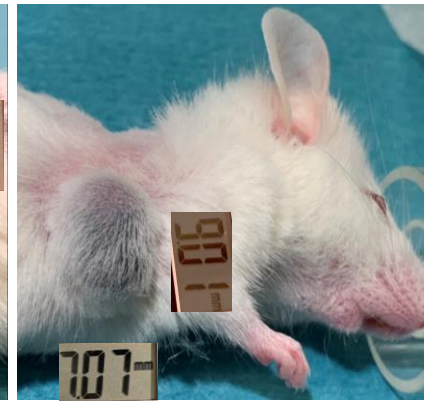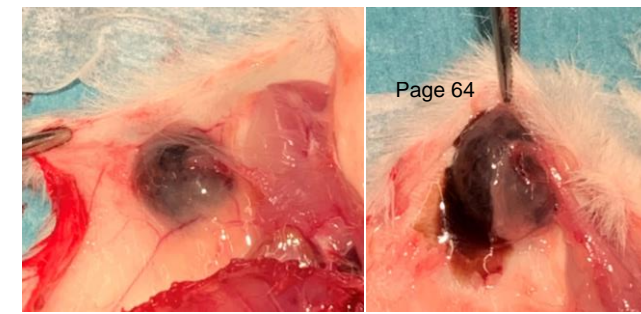

2nd tumor, behind right for leg, dark liquid coming out of it

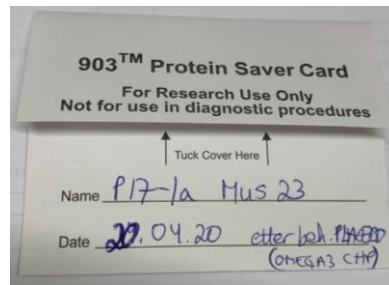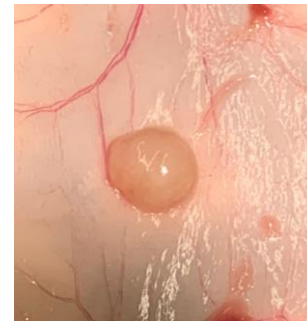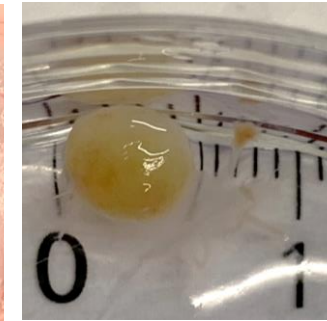

Xenograft attached to the skin

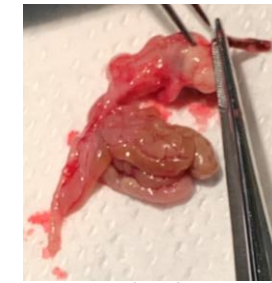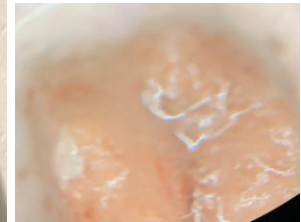

Stomach clogged, little food in the colon right; clog inspected in microscope (hair and food)

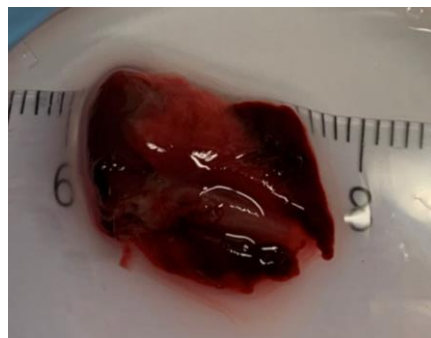

Lungs and heart.  
Small lungs?

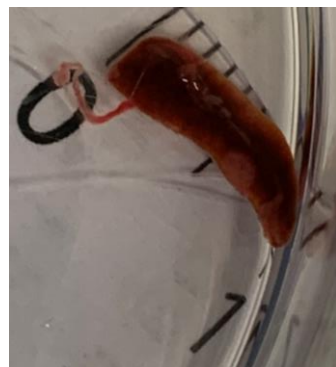

Spleen, small/normal,  
ca 1 cm

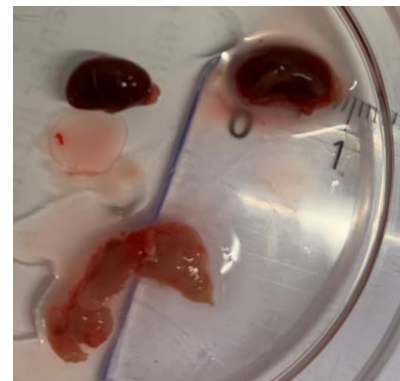

Kidneys and thymus

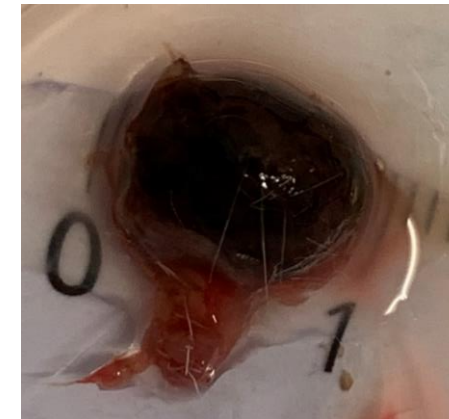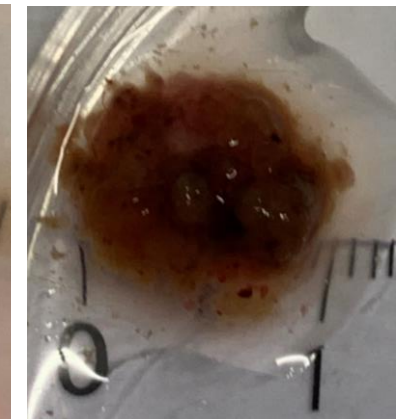

2nd tumor, before and after flushed with NaCl

Supplementary figure 1-23-6. Autopsy card filled out during necroscopy

**AUTOPSY CARD**

|                                                                                                                        |                             |                           |                            |                                                                                                |
|------------------------------------------------------------------------------------------------------------------------|-----------------------------|---------------------------|----------------------------|------------------------------------------------------------------------------------------------|
| NUMBER<br>23 – (P17-1a) – ear cut 1                                                                                    | Male<br>Female<br>X         | STRAIN<br>CIEA NOG        | BIRTH DATE<br>January 2019 | EXPERIMENT<br>PDX – Xenograft                                                                  |
| AGE AT DEATH                                                                                                           | DEATH MODE<br>DATE 20.04.20 |                           |                            | GROUP<br>Pettersen, Caroline                                                                   |
| CLINICAL SYMPTOMS AT DEATH<br>Secondary tumor right shoulder, xenograft<br>Reduced weight (from 25-20 g in 2 weeks)    |                             |                           |                            |                                                                                                |
| ORGAN WEIGHT                                                                                                           |                             | SECTION TAKEN             |                            |                                                                                                |
| ORGAN                                                                                                                  | WEIGHT                      | ORGAN                     | YES                        | GROSS OBSERVATION                                                                              |
| Femur                                                                                                                  |                             | 1) Lung + Heart (LH)      | X                          | small lungs? Filled with formalin                                                              |
| Liver                                                                                                                  |                             | 2) Liver (L)              | X                          | OK                                                                                             |
|                                                                                                                        |                             | 3) Kidney (N)             | X                          | OK                                                                                             |
| Spleen                                                                                                                 |                             | 4) Adrenal                |                            |                                                                                                |
|                                                                                                                        |                             | 5) Testis/Ovary           |                            |                                                                                                |
| Kidney                                                                                                                 |                             | 6) Spleen + pancreas (MP) | X                          | small spleen ca 1cm                                                                            |
|                                                                                                                        |                             | 7) Lymph nodes            |                            |                                                                                                |
| Testis/Ovary                                                                                                           |                             | 8) Bone marrow            |                            |                                                                                                |
|                                                                                                                        |                             | 9) Xenograft (X)          | X                          | light colour                                                                                   |
|                                                                                                                        |                             | 10) Thymus (T)            | X                          | light colour                                                                                   |
|                                                                                                                        |                             | 11) 2nd tumor right (TR)  | X                          | 7 x 9 mm right shoulder/abdomen, dark colour                                                   |
|                                                                                                                        |                             | 12) 2nd tumor left (TL)   |                            |                                                                                                |
|                                                                                                                        |                             | 13) clump in stomach      | X                          | Inspected in microscope, fur and food clinged together, blocked the stomach, no food in colon. |
| NB!                                                                                                                    |                             |                           |                            |                                                                                                |
| Notes : Blood card ✓ 40 µl, same as before treatment<br>Blood plasma ✓ 1 tube, hard to get blood sampled<br>Pictures ✓ |                             |                           |                            |                                                                                                |
| Prever levert ingunn : TR, MP, X, LH                                                                                   |                             |                           |                            |                                                                                                |

Autopsy card modified from: [http://www.pathbase.net/Necropsy\\_of\\_the\\_Mouse/](http://www.pathbase.net/Necropsy_of_the_Mouse/)



Supplementary figure 1-23-7. Score sheets

NTNU Score sheet FOTS: Avdeling for komparativ medisin (AKM) Responsible researcher: Pettersen Animal ID: (P17-1a) (23) Wipp 1

| Parameter                                               | State                                        | Assessment scale | Date  | Date | Date | Date | Date | Date | Date | Date | Date | Date |
|---------------------------------------------------------|----------------------------------------------|------------------|-------|------|------|------|------|------|------|------|------|------|
| General appearance                                      | Normal                                       | 0                | 20/8  | 24/8 | 29/8 | 29/8 | 24/9 | 6/9  | 8/9  | 11/9 | 13/9 | 18/9 |
|                                                         | Reduced grooming                             | 1                |       |      |      |      |      |      |      |      |      |      |
|                                                         | Minor distention of abdomen, rough hair coat | 3                |       |      |      |      |      |      |      |      |      |      |
|                                                         | Hunchback or distended abdomen, inactive     | 18               |       |      |      |      |      |      |      |      |      |      |
| Behaviour (Level of activity)                           | Normal                                       | 0                |       |      |      |      |      |      |      |      |      |      |
|                                                         | Slightly reduced                             | 1                |       |      |      |      |      |      |      |      |      |      |
|                                                         | Moderately reduced                           | 3                |       |      |      |      |      |      |      |      |      |      |
|                                                         | Distressed behaviour due to growing tumour   | 3                |       |      |      |      |      |      |      |      |      |      |
|                                                         | Obviously reduced                            | 5                |       |      |      |      |      |      |      |      |      |      |
| Body weight (Compared to body weight before experiment) | Isolated, inactive, lethargic                | 18               |       |      |      |      |      |      |      |      |      |      |
|                                                         | Body weight:                                 |                  | 23,6g | 24,5 | 24,1 | 24,1 | 24,1 | 24,1 | 24,1 | 24,1 | 24,1 | 24,1 |
|                                                         | No loss                                      | 0                |       |      |      |      |      |      |      |      |      |      |
|                                                         | Loss < 5%                                    | 1                |       |      |      |      |      |      |      |      |      |      |
|                                                         | Loss 5-9%                                    | 3                |       |      |      |      |      |      |      |      |      |      |
| Clinical signs (Infection, bleeding, discoloration)     | Loss 10-14%                                  | 5                |       |      |      |      |      |      |      |      |      |      |
|                                                         | Loss > 15%                                   | 18               |       |      |      |      |      |      |      |      |      |      |
|                                                         | Normal                                       | 0                |       |      |      |      |      |      |      |      |      |      |
|                                                         | Minor irritation around surgical wound       | 1                |       |      |      |      |      |      |      |      |      |      |
|                                                         | Moderate irritation/infected surgical wound  | 3                |       |      |      |      |      |      |      |      |      |      |
| Total:                                                  | Infected/open surgical wound                 | 4*               |       |      |      |      |      |      |      |      |      |      |
|                                                         | Tumour > 1,0 cm in diameter                  | 10               |       |      |      |      |      |      |      |      |      |      |
|                                                         | Tumour > 1,5 cm in diameter                  | 18               |       |      |      |      |      |      |      |      |      |      |
|                                                         | Ulcerous tumour                              | 18               |       |      |      |      |      |      |      |      |      |      |
|                                                         | Comments, treatments etc:                    |                  |       |      |      |      |      |      |      |      |      |      |

0-3: Normal  
4-9: Pay attention to health state and consider treatment  
10-13: Pay close attention to health state, consider treatment or euthanasia  
14-18: Euthanasia \*Start treatment with antibiotics. If no effect within 3 days, euthanize the animal

NTNU Score sheet FOTS: Avdeling for komparativ medisin (AKM) Responsible researcher: Pettersen Animal ID: (P17-1a) (23) Wipp 1

| Parameter                                               | State                                        | Assessment scale | Date | Date | Date | Date | Date | Date | Date | Date  | Date  | Date  |
|---------------------------------------------------------|----------------------------------------------|------------------|------|------|------|------|------|------|------|-------|-------|-------|
| General appearance                                      | Normal                                       | 0                | 20/9 | 23/9 | 25/9 | 30/9 | 2/10 | 4/10 | 8/10 | 11/10 | 14/10 | 16/10 |
|                                                         | Reduced grooming                             | 1                |      |      |      |      |      |      |      |       |       |       |
|                                                         | Minor distention of abdomen, rough hair coat | 3                |      |      |      |      |      |      |      |       |       |       |
|                                                         | Hunchback or distended abdomen, inactive     | 18               |      |      |      |      |      |      |      |       |       |       |
| Behaviour (Level of activity)                           | Normal                                       | 0                |      |      |      |      |      |      |      |       |       |       |
|                                                         | Slightly reduced                             | 1                |      |      |      |      |      |      |      |       |       |       |
|                                                         | Moderately reduced                           | 3                |      |      |      |      |      |      |      |       |       |       |
|                                                         | Distressed behaviour due to growing tumour   | 3                |      |      |      |      |      |      |      |       |       |       |
|                                                         | Obviously reduced                            | 5                |      |      |      |      |      |      |      |       |       |       |
| Body weight (Compared to body weight before experiment) | Isolated, inactive, lethargic                | 18               |      |      |      |      |      |      |      |       |       |       |
|                                                         | Body weight:                                 |                  | 24,0 | 23,8 | 22,8 | 23,6 | 23,8 | 23,1 | 23,1 | 24,1  | 23,5  | 22,9  |
|                                                         | No loss                                      | 0                |      |      |      |      |      |      |      |       |       |       |
|                                                         | Loss < 5%                                    | 1                |      |      |      |      |      |      |      |       |       |       |
|                                                         | Loss 5-9%                                    | 3                |      |      |      |      |      |      |      |       |       |       |
| Clinical signs (Infection, bleeding, discoloration)     | Loss 10-14%                                  | 5                |      |      |      |      |      |      |      |       |       |       |
|                                                         | Loss > 15%                                   | 18               |      |      |      |      |      |      |      |       |       |       |
|                                                         | Normal                                       | 0                |      |      |      |      |      |      |      |       |       |       |
|                                                         | Minor irritation around surgical wound       | 1                |      |      |      |      |      |      |      |       |       |       |
|                                                         | Moderate irritation/infected surgical wound  | 3                |      |      |      |      |      |      |      |       |       |       |
| Total:                                                  | Infected/open surgical wound                 | 4*               |      |      |      |      |      |      |      |       |       |       |
|                                                         | Tumour > 1,0 cm in diameter                  | 10               |      |      |      |      |      |      |      |       |       |       |
|                                                         | Tumour > 1,5 cm in diameter                  | 18               |      |      |      |      |      |      |      |       |       |       |
|                                                         | Ulcerous tumour                              | 18               |      |      |      |      |      |      |      |       |       |       |
|                                                         | Comments, treatments etc:                    |                  |      |      |      |      |      |      |      |       |       |       |

0-3: Normal  
4-9: Pay attention to health state and consider treatment  
10-13: Pay close attention to health state, consider treatment or euthanasia  
14-18: Euthanasia \*Start treatment with antibiotics. If no effect within 3 days, euthanize the animal

NTNU Score sheet FOTS: Avdeling for komparativ medisin (AKM) Responsible researcher: Pettersen Animal ID: (P17-1a) (23) Wipp 1

| Parameter                                               | State                                        | Assessment scale | Date  | Date  | Date  | Date  | Date  | Date  | Date | Date | Date | Date  |
|---------------------------------------------------------|----------------------------------------------|------------------|-------|-------|-------|-------|-------|-------|------|------|------|-------|
| General appearance                                      | Normal                                       | 0                | 16/10 | 18/10 | 20/10 | 23/10 | 28/10 | 30/10 | 1/11 | 4/11 | 8/11 | 12/11 |
|                                                         | Reduced grooming                             | 1                |       |       |       |       |       |       |      |      |      |       |
|                                                         | Minor distention of abdomen, rough hair coat | 3                |       |       |       |       |       |       |      |      |      |       |
|                                                         | Hunchback or distended abdomen, inactive     | 18               |       |       |       |       |       |       |      |      |      |       |
| Behaviour (Level of activity)                           | Normal                                       | 0                |       |       |       |       |       |       |      |      |      |       |
|                                                         | Slightly reduced                             | 1                |       |       |       |       |       |       |      |      |      |       |
|                                                         | Moderately reduced                           | 3                |       |       |       |       |       |       |      |      |      |       |
|                                                         | Distressed behaviour due to growing tumour   | 3                |       |       |       |       |       |       |      |      |      |       |
|                                                         | Obviously reduced                            | 5                |       |       |       |       |       |       |      |      |      |       |
| Body weight (Compared to body weight before experiment) | Isolated, inactive, lethargic                | 18               |       |       |       |       |       |       |      |      |      |       |
|                                                         | Body weight:                                 |                  | 22,9  | 23,4  | 23,2  | 23,5  | 24,4  | 26,0  | 23,4 | 24,1 | 25,2 | 24,1  |
|                                                         | No loss                                      | 0                |       |       |       |       |       |       |      |      |      |       |
|                                                         | Loss < 5%                                    | 1                |       |       |       |       |       |       |      |      |      |       |
|                                                         | Loss 5-9%                                    | 3                |       |       |       |       |       |       |      |      |      |       |
| Clinical signs (Infection, bleeding, discoloration)     | Loss 10-14%                                  | 5                |       |       |       |       |       |       |      |      |      |       |
|                                                         | Loss > 15%                                   | 18               |       |       |       |       |       |       |      |      |      |       |
|                                                         | Normal                                       | 0                |       |       |       |       |       |       |      |      |      |       |
|                                                         | Minor irritation around surgical wound       | 1                |       |       |       |       |       |       |      |      |      |       |
|                                                         | Moderate irritation/infected surgical wound  | 3                |       |       |       |       |       |       |      |      |      |       |
| Total:                                                  | Infected/open surgical wound                 | 4*               |       |       |       |       |       |       |      |      |      |       |
|                                                         | Tumour > 1,0 cm in diameter                  | 10               |       |       |       |       |       |       |      |      |      |       |
|                                                         | Tumour > 1,5 cm in diameter                  | 18               |       |       |       |       |       |       |      |      |      |       |
|                                                         | Ulcerous tumour                              | 18               |       |       |       |       |       |       |      |      |      |       |
|                                                         | Comments, treatments etc:                    |                  |       |       |       |       |       |       |      |      |      |       |

0-3: Normal  
4-9: Pay attention to health state and consider treatment  
10-13: Pay close attention to health state, consider treatment or euthanasia  
14-18: Euthanasia \*Start treatment with antibiotics. If no effect within 3 days, euthanize the animal

NTNU Score sheet FOTS: Avdeling for komparativ medisin (AKM) Responsible researcher: Pettersen Animal ID: (P17-1a) (23) Wipp 1

| Parameter                                               | State                                        | Assessment scale | Date  | Date  | Date  | Date  | Date  | Date | Date | Date | Date  | Date  |
|---------------------------------------------------------|----------------------------------------------|------------------|-------|-------|-------|-------|-------|------|------|------|-------|-------|
| General appearance                                      | Normal                                       | 0                | 15/11 | 18/11 | 20/11 | 25/11 | 30/11 | 2/12 | 5/12 | 9/12 | 11/12 | 14/12 |
|                                                         | Reduced grooming                             | 1                |       |       |       |       |       |      |      |      |       |       |
|                                                         | Minor distention of abdomen, rough hair coat | 3                |       |       |       |       |       |      |      |      |       |       |
|                                                         | Hunchback or distended abdomen, inactive     | 18               |       |       |       |       |       |      |      |      |       |       |
| Behaviour (Level of activity)                           | Normal                                       | 0                |       |       |       |       |       |      |      |      |       |       |
|                                                         | Slightly reduced                             | 1                |       |       |       |       |       |      |      |      |       |       |
|                                                         | Moderately reduced                           | 3                |       |       |       |       |       |      |      |      |       |       |
|                                                         | Distressed behaviour due to growing tumour   | 3                |       |       |       |       |       |      |      |      |       |       |
|                                                         | Obviously reduced                            | 5                |       |       |       |       |       |      |      |      |       |       |
| Body weight (Compared to body weight before experiment) | Isolated, inactive, lethargic                | 18               |       |       |       |       |       |      |      |      |       |       |
|                                                         | Body weight:                                 |                  | 22,2  | 24,3  | 23,4  | 23,7  | 23    | 23,4 | 23,5 | 23,4 | 24,6  | 24,2  |
|                                                         | No loss                                      | 0                |       |       |       |       |       |      |      |      |       |       |
|                                                         | Loss < 5%                                    | 1                |       |       |       |       |       |      |      |      |       |       |
|                                                         | Loss 5-9%                                    | 3                |       |       |       |       |       |      |      |      |       |       |
| Clinical signs (Infection, bleeding, discoloration)     | Loss 10-14%                                  | 5                |       |       |       |       |       |      |      |      |       |       |
|                                                         | Loss > 15%                                   | 18               |       |       |       |       |       |      |      |      |       |       |
|                                                         | Normal                                       | 0                |       |       |       |       |       |      |      |      |       |       |
|                                                         | Minor irritation around surgical wound       | 1                |       |       |       |       |       |      |      |      |       |       |
|                                                         | Moderate irritation/infected surgical wound  | 3                |       |       |       |       |       |      |      |      |       |       |
| Total:                                                  | Infected/open surgical wound                 | 4*               |       |       |       |       |       |      |      |      |       |       |
|                                                         | Tumour > 1,0 cm in diameter                  | 10               |       |       |       |       |       |      |      |      |       |       |
|                                                         | Tumour > 1,5 cm in diameter                  | 18               |       |       |       |       |       |      |      |      |       |       |
|                                                         | Ulcerous tumour                              | 18               |       |       |       |       |       |      |      |      |       |       |
|                                                         | Comments, treatments etc:                    |                  |       |       |       |       |       |      |      |      |       |       |

0-3: Normal  
4-9: Pay attention to health state and consider treatment  
10-13: Pay close attention to health state, consider treatment or euthanasia  
14-18: Euthanasia \*Start treatment with antibiotics. If no effect within 3 days, euthanize the animal

NTNU Score sheet FOTS: Avdeling for komparativ medisin (AKM) Responsible researcher: Pettersen Animal ID: (P17-1a) (23) Wipp 1

| Parameter                                               | State                                        | Assessment scale | Date | Date  | Date  | Date  | Date  | Date  | Date | Date | Date | Date |
|---------------------------------------------------------|----------------------------------------------|------------------|------|-------|-------|-------|-------|-------|------|------|------|------|
| General appearance                                      | Normal                                       | 0                | 8/12 | 20/12 | 23/12 | 24/12 | 27/12 | 31/12 | 4/1  | 8/1  | 13/1 | 15/1 |
|                                                         | Reduced grooming                             | 1                |      |       |       |       |       |       |      |      |      |      |
|                                                         | Minor distention of abdomen, rough hair coat | 3                |      |       |       |       |       |       |      |      |      |      |
|                                                         | Hunchback or distended abdomen, inactive     | 18               |      |       |       |       |       |       |      |      |      |      |
| Behaviour (Level of activity)                           | Normal                                       | 0                |      |       |       |       |       |       |      |      |      |      |
|                                                         | Slightly reduced                             | 1                |      |       |       |       |       |       |      |      |      |      |
|                                                         | Moderately reduced                           | 3                |      |       |       |       |       |       |      |      |      |      |
|                                                         | Distressed behaviour due to growing tumour   | 3                |      |       |       |       |       |       |      |      |      |      |
|                                                         | Obviously reduced                            | 5                |      |       |       |       |       |       |      |      |      |      |
| Body weight (Compared to body weight before experiment) | Isolated, inactive, lethargic                | 18               |      |       |       |       |       |       |      |      |      |      |
|                                                         | Body weight:                                 |                  | 23,3 | 23    | 24,2  | 24,6  | 22,8  | 23,5  | 23,6 | 24,3 | 23   | 24,2 |
|                                                         | No loss                                      | 0                |      |       |       |       |       |       |      |      |      |      |
|                                                         | Loss < 5%                                    | 1                |      |       |       |       |       |       |      |      |      |      |
|                                                         | Loss 5-9%                                    | 3                |      |       |       |       |       |       |      |      |      |      |
| Clinical signs (Infection, bleeding, discoloration)     | Loss 10-14%                                  | 5                |      |       |       |       |       |       |      |      |      |      |
|                                                         | Loss > 15%                                   | 18               |      |       |       |       |       |       |      |      |      |      |
|                                                         | Normal                                       | 0                |      |       |       |       |       |       |      |      |      |      |
|                                                         | Minor irritation around surgical wound       | 1                |      |       |       |       |       |       |      |      |      |      |
|                                                         | Moderate irritation/infected surgical wound  | 3                |      |       |       |       |       |       |      |      |      |      |
| Total:                                                  | Infected/open surgical wound                 | 4*               |      |       |       |       |       |       |      |      |      |      |
|                                                         | Tumour > 1,0 cm in diameter                  | 10               |      |       |       |       |       |       |      |      |      |      |
|                                                         | Tumour > 1,5 cm in diameter                  | 18               |      |       |       |       |       |       |      |      |      |      |
|                                                         | Ulcerous tumour                              | 18               |      |       |       |       |       |       |      |      |      |      |
|                                                         | Comments, treatments etc:                    |                  |      |       |       |       |       |       |      |      |      |      |

0-3: Normal  
4-9: Pay attention to health state and consider treatment  
10-13: Pay close attention to health state, consider treatment or euthanasia  
14-18: Euthanasia \*Start treatment with antibiotics. If no effect within 3 days, euthanize the animal

NTNU Score sheet FOTS: Avdeling for komparativ medisin (AKM) Responsible researcher: Pettersen Animal ID: (P17-1a) (23) Wipp 1

| Parameter                                               | State                                        | Assessment scale | Date | Date | Date | Date | Date | Date | Date | Date | Date | Date |
|---------------------------------------------------------|----------------------------------------------|------------------|------|------|------|------|------|------|------|------|------|------|
| General appearance                                      | Normal                                       | 0                | 20/1 | 22/1 | 24/1 | 27/1 | 29/1 | 30/1 | 3/2  | 5/2  | 7/2  | 11/2 |
|                                                         | Reduced grooming                             | 1                |      |      |      |      |      |      |      |      |      |      |
|                                                         | Minor distention of abdomen, rough hair coat | 3                |      |      |      |      |      |      |      |      |      |      |
|                                                         | Hunchback or distended abdomen, inactive     | 18               |      |      |      |      |      |      |      |      |      |      |
| Behaviour (Level of activity)                           | Normal                                       | 0                |      |      |      |      |      |      |      |      |      |      |
|                                                         | Slightly reduced                             | 1                |      |      |      |      |      |      |      |      |      |      |
|                                                         | Moderately reduced                           | 3                |      |      |      |      |      |      |      |      |      |      |
|                                                         | Distressed behaviour due to growing tumour   | 3                |      |      |      |      |      |      |      |      |      |      |
|                                                         | Obviously reduced                            | 5                |      |      |      |      |      |      |      |      |      |      |
| Body weight (Compared to body weight before experiment) | Isolated, inactive, lethargic                | 18               |      |      |      |      |      |      |      |      |      |      |
|                                                         | Body weight:                                 |                  | 21,2 | 24,2 | 22,2 | 24,4 | 24,8 | 24,5 | 25,6 | 22,2 | 25   | 24   |
|                                                         | No loss                                      | 0                |      |      |      |      |      |      |      |      |      |      |
|                                                         | Loss < 5%                                    | 1                |      |      |      |      |      |      |      |      |      |      |
|                                                         | Loss 5-9%                                    | 3                |      |      |      |      |      |      |      |      |      |      |
| Clinical signs (Infection, bleeding, discoloration)     | Loss 10-14%                                  | 5                |      |      |      |      |      |      |      |      |      |      |
|                                                         | Loss > 15%                                   | 18               |      |      |      |      |      |      |      |      |      |      |
|                                                         | Normal                                       | 0                |      |      |      |      |      |      |      |      |      |      |
|                                                         | Minor irritation around surgical wound       | 1                |      |      |      |      |      |      |      |      |      |      |
|                                                         | Moderate irritation/infected surgical wound  | 3                |      |      |      |      |      |      |      |      |      |      |
| Total:                                                  | Infected/open surgical wound                 | 4*               |      |      |      |      |      |      |      |      |      |      |
|                                                         | Tumour > 1,0 cm in diameter                  | 10               |      |      |      |      |      |      |      |      |      |      |
|                                                         | Tumour > 1,5 cm in diameter                  | 18               |      |      |      |      |      |      |      |      |      |      |
|                                                         | Ulcerous tumour                              | 18               |      |      |      |      |      |      |      |      |      |      |
|                                                         | Comments, treatments etc:                    |                  |      |      |      |      |      |      |      |      |      |      |

0-3: Normal  
4-9: Pay attention to health state and consider treatment  
10-13: Pay close attention to health state, consider treatment or euthanasia  
14-18: Euthanasia \*Start treatment with antibiotics. If no effect within 3 days, euthanize the animal

Supplementary figure 1-23-7. Score sheets

NTNU Score sheet FOTS: Avdeling for komparativ medisin (AKM) Responsible researcher: Pettersen (P17-1a) Animal ID: 23 klipp 1

| Parameter                                               | State                                        | Assessment scale | Date | Date | Date | Date | Date | Date | Date | Date | Date | Date | Date |
|---------------------------------------------------------|----------------------------------------------|------------------|------|------|------|------|------|------|------|------|------|------|------|
| General appearance                                      | Normal                                       | 0                | 11/2 | 12/2 | 14/2 | 17/2 | 19/2 | 21/2 | 24/2 | 25/2 | 26/2 | 28/2 | 29/2 |
|                                                         | Reduced grooming                             | 1                |      |      |      |      |      |      |      |      |      |      |      |
|                                                         | Minor distention of abdomen, rough hair coat | 3                |      |      |      |      |      |      |      |      |      |      |      |
|                                                         | Hunchback or distended abdomen, inactive     | 18               |      |      |      |      |      |      |      |      |      |      |      |
| Behaviour (Level of activity)                           | Normal                                       | 0                |      |      |      |      |      |      |      |      |      |      |      |
|                                                         | Slightly reduced                             | 1                |      |      |      |      |      |      |      |      |      |      |      |
|                                                         | Moderately reduced                           | 3                |      |      |      |      |      |      |      |      |      |      |      |
|                                                         | Distressed behaviour due to growing tumour   | 3                |      |      |      |      |      |      |      |      |      |      |      |
|                                                         | Obviously reduced                            | 5                |      |      |      |      |      |      |      |      |      |      |      |
| Body weight (Compared to body weight before experiment) | Isolated, inactive, lethargic                | 18               |      |      |      |      |      |      |      |      |      |      |      |
|                                                         | Body weight:                                 |                  | 24   | 23   | 22,9 | 22,4 | 23,1 | 22,1 | 23,1 | 23,1 | 23,1 | 23,1 | 23,7 |
|                                                         | No loss                                      | 0                |      |      |      |      |      |      |      |      |      |      |      |
|                                                         | Loss < 5%                                    | 1                |      |      |      |      |      |      |      |      |      |      |      |
|                                                         | Loss 5-9%                                    | 3                |      |      |      |      |      |      |      |      |      |      |      |
| Clinical signs (Infection, bleeding, discoloration)     | Loss 10-14%                                  | 5                |      |      |      |      |      |      |      |      |      |      |      |
|                                                         | Loss ≥ 15%                                   | 18               |      |      |      |      |      |      |      |      |      |      |      |
|                                                         | Normal                                       | 0                | 4,9  | 4,9  | 4,9  | 4,9  | 4,9  | 5    | 5    | 5,1  | 5,2  | 5,2  | 5,2  |
|                                                         | Minor irritation around surgical wound       | 1                |      |      |      |      |      |      |      |      |      |      |      |
|                                                         | Moderate irritation/infected surgical wound  | 3                |      |      |      |      |      |      |      |      |      |      |      |

Comments, treatments etc: 22-25g PLACEBO

apemic, little blood below a stripe each day but never visible for at least 3 days

NTNU Score sheet FOTS: Avdeling for komparativ medisin (AKM) Responsible researcher: Pettersen (P17-1a) Animal ID: 23 klipp 1

| Parameter                                               | State                                        | Assessment scale | Date | Date | Date | Date | Date | Date | Date | Date | Date | Date | Date |
|---------------------------------------------------------|----------------------------------------------|------------------|------|------|------|------|------|------|------|------|------|------|------|
| General appearance                                      | Normal                                       | 0                | 4/3  | 6/3  | 9/3  | 11/3 | 16/3 | 20/3 | 23/3 | 27/3 | 30/3 | 3/4  | 10/4 |
|                                                         | Reduced grooming                             | 1                |      |      |      |      |      |      |      |      |      |      |      |
|                                                         | Minor distention of abdomen, rough hair coat | 3                |      |      |      |      |      |      |      |      |      |      |      |
|                                                         | Hunchback or distended abdomen, inactive     | 18               |      |      |      |      |      |      |      |      |      |      |      |
| Behaviour (Level of activity)                           | Normal                                       | 0                |      |      |      |      |      |      |      |      |      |      |      |
|                                                         | Slightly reduced                             | 1                |      |      |      |      |      |      |      |      |      |      |      |
|                                                         | Moderately reduced                           | 3                |      |      |      |      |      |      |      |      |      |      |      |
|                                                         | Distressed behaviour due to growing tumour   | 3                |      |      |      |      |      |      |      |      |      |      |      |
|                                                         | Obviously reduced                            | 5                |      |      |      |      |      |      |      |      |      |      |      |
| Body weight (Compared to body weight before experiment) | Isolated, inactive, lethargic                | 18               |      |      |      |      |      |      |      |      |      |      |      |
|                                                         | Body weight:                                 |                  | 23,2 | 23,6 | 23,1 | 24,5 | 22,5 | 24,6 | 22,7 | 24,3 | 25,0 | 24,8 | 25,5 |
|                                                         | No loss                                      | 0                |      |      |      |      |      |      |      |      |      |      |      |
|                                                         | Loss < 5%                                    | 1                |      |      |      |      |      |      |      |      |      |      |      |
|                                                         | Loss 5-9%                                    | 3                |      |      |      |      |      |      |      |      |      |      |      |
| Clinical signs (Infection, bleeding, discoloration)     | Loss 10-14%                                  | 5                |      |      |      |      |      |      |      |      |      |      |      |
|                                                         | Loss ≥ 15%                                   | 18               |      |      |      |      |      |      |      |      |      |      |      |
|                                                         | Normal                                       | 0                | 5,3  | 5,4  | 5,6  | 5,6  | 5,6  | 5,7  | 5,8  | 5,8  | 5,8  | 5,8  | 5,8  |
|                                                         | Minor irritation around surgical wound       | 1                |      |      |      |      |      |      |      |      |      |      |      |
|                                                         | Moderate irritation/infected surgical wound  | 3                |      |      |      |      |      |      |      |      |      |      |      |

Comments, treatments etc: PLACEBO

apemic, little blood below a stripe each day but never visible for at least 3 days

NTNU Score sheet FOTS: Avdeling for komparativ medisin (AKM) Responsible researcher: Pettersen (P17-1a) Animal ID: 23 klipp 1

| Parameter                                               | State                                        | Assessment scale | Date | Date | Date | Date | Date | Date | Date | Date | Date | Date | Date |
|---------------------------------------------------------|----------------------------------------------|------------------|------|------|------|------|------|------|------|------|------|------|------|
| General appearance                                      | Normal                                       | 0                | 10/4 | 14/4 | 17/4 | 20/4 |      |      |      |      |      |      |      |
|                                                         | Reduced grooming                             | 1                |      |      |      |      |      |      |      |      |      |      |      |
|                                                         | Minor distention of abdomen, rough hair coat | 3                |      |      |      |      |      |      |      |      |      |      |      |
|                                                         | Hunchback or distended abdomen, inactive     | 18               |      |      |      |      |      |      |      |      |      |      |      |
| Behaviour (Level of activity)                           | Normal                                       | 0                |      |      |      |      |      |      |      |      |      |      |      |
|                                                         | Slightly reduced                             | 1                |      |      |      |      |      |      |      |      |      |      |      |
|                                                         | Moderately reduced                           | 3                |      |      |      |      |      |      |      |      |      |      |      |
|                                                         | Distressed behaviour due to growing tumour   | 3                |      |      |      |      |      |      |      |      |      |      |      |
|                                                         | Obviously reduced                            | 5                |      |      |      |      |      |      |      |      |      |      |      |
| Body weight (Compared to body weight before experiment) | Isolated, inactive, lethargic                | 18               |      |      |      |      |      |      |      |      |      |      |      |
|                                                         | Body weight:                                 |                  | 25   | 23,5 | 22,7 | 20,1 |      |      |      |      |      |      |      |
|                                                         | No loss                                      | 0                |      |      |      |      |      |      |      |      |      |      |      |
|                                                         | Loss < 5%                                    | 1                |      |      |      |      |      |      |      |      |      |      |      |
|                                                         | Loss 5-9%                                    | 3                |      |      |      |      |      |      |      |      |      |      |      |
| Clinical signs (Infection, bleeding, discoloration)     | Loss 10-14%                                  | 5                |      |      |      |      |      |      |      |      |      |      |      |
|                                                         | Loss ≥ 15%                                   | 18               |      |      |      |      |      |      |      |      |      |      |      |
|                                                         | Normal                                       | 0                | 5,9  | 5,9  | 5,9  | 5,9  | 5,9  | 5,9  | 5,9  | 5,9  | 5,9  | 5,9  | 5,9  |
|                                                         | Minor irritation around surgical wound       | 1                |      |      |      |      |      |      |      |      |      |      |      |
|                                                         | Moderate irritation/infected surgical wound  | 3                |      |      |      |      |      |      |      |      |      |      |      |

Comments, treatments etc: PLACEBO

apemic, little blood below a stripe each day but never visible for at least 3 days



**Supplementary figure 1-23-8.**  
Mouse, xenograft and secondary  
tumor growth curves

Weight curve

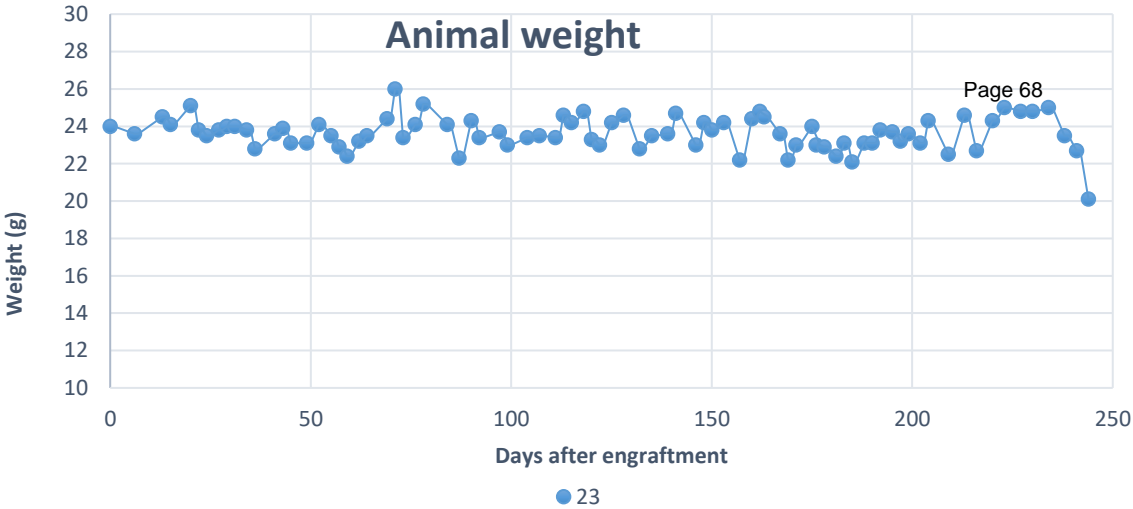

Xenograft growth curve

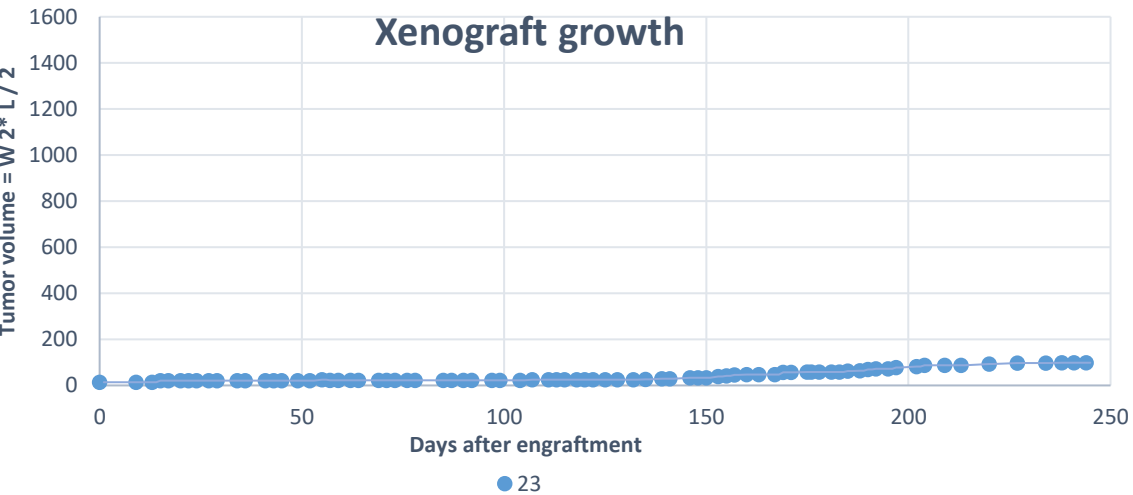

Secondary tumor growth curve

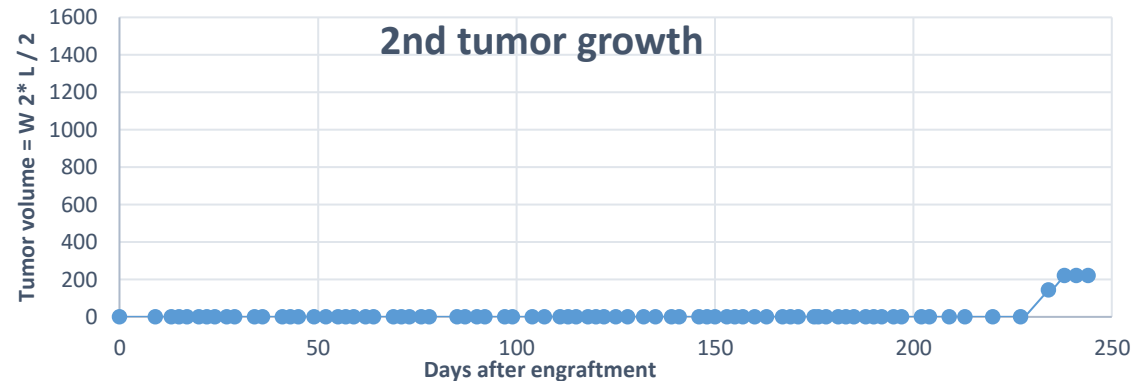

## Supplementary figure 1-23-9. Histology pictures

X – xenograft

- CRC Tumor glandulas with necrotic debris in the lumen
- No lymphoma cells
- Mucus
- Necrotic tissue
- Connective tissue

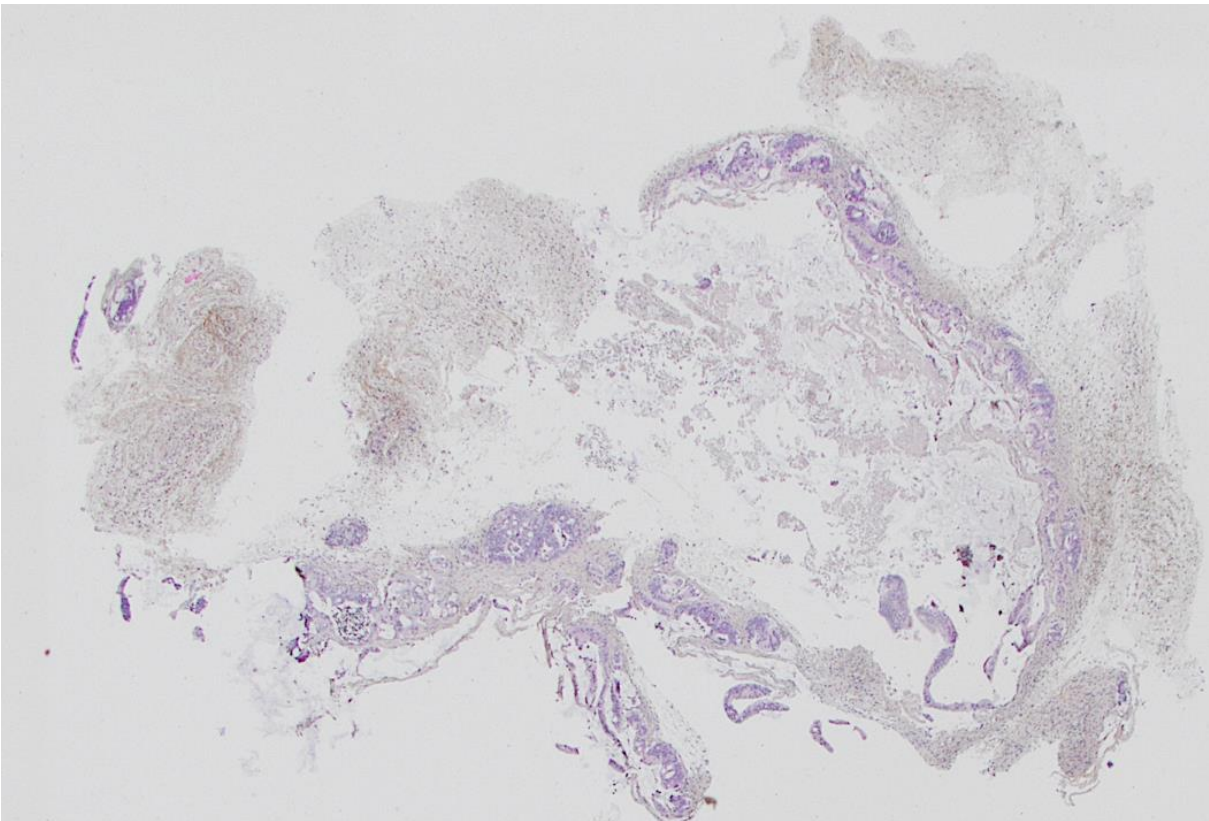

TR – tumor right side (dark bladder with liquid)

- Possible some kind of cyst
- Liquid filled structures
- Does not look malign
- Regularly epithelia

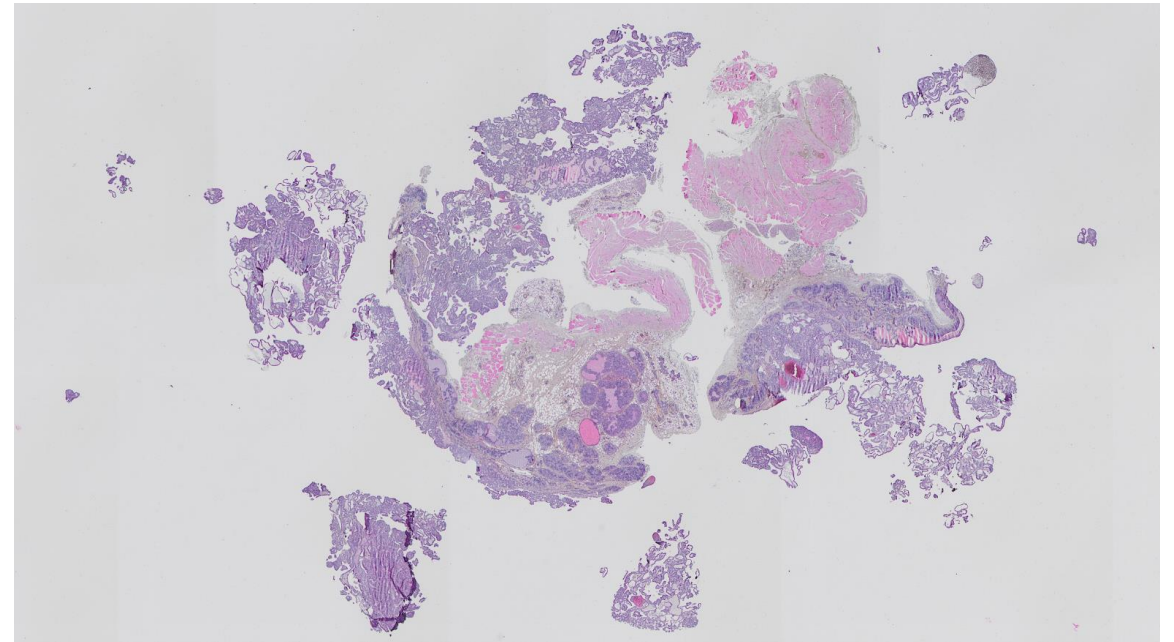



### Lungs and heart

- Look normal, however a bit compact lungs
- Possibly macrophages in the lungs

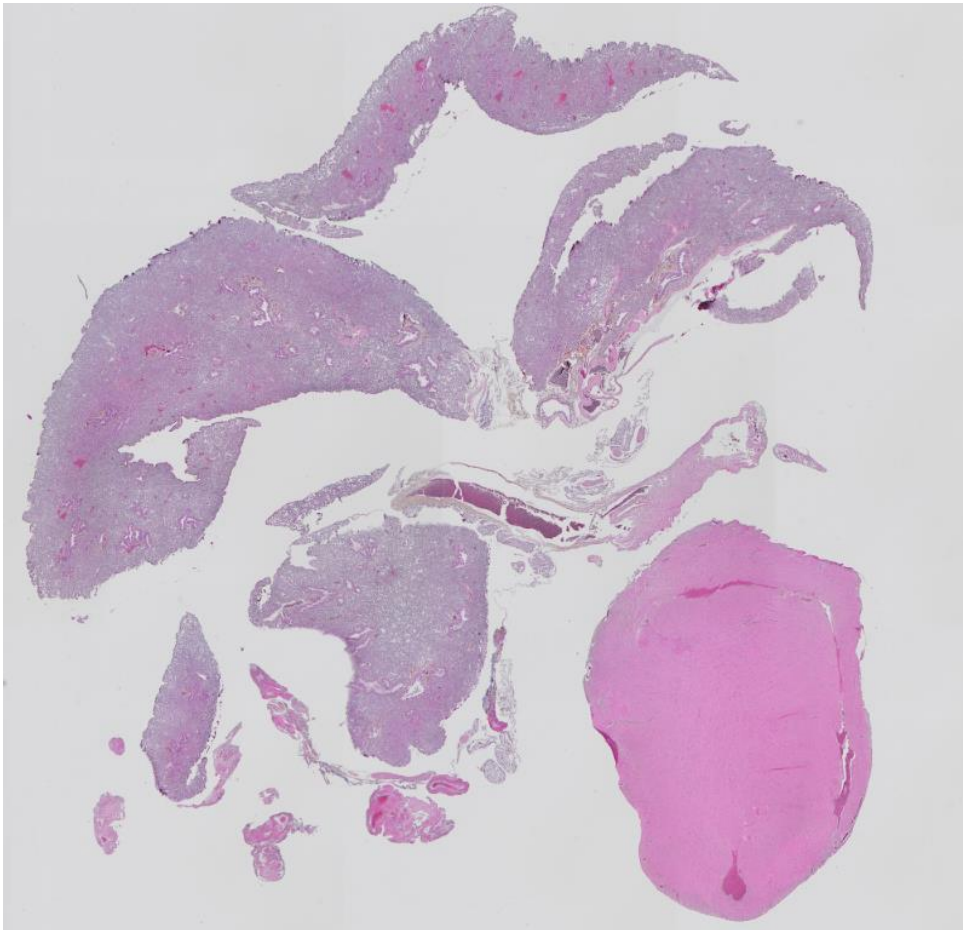

### Spleen and pancreas

- pancreas looks normal
- no lymphoid cancer cells
- fibrotic field in the middle of the spleen

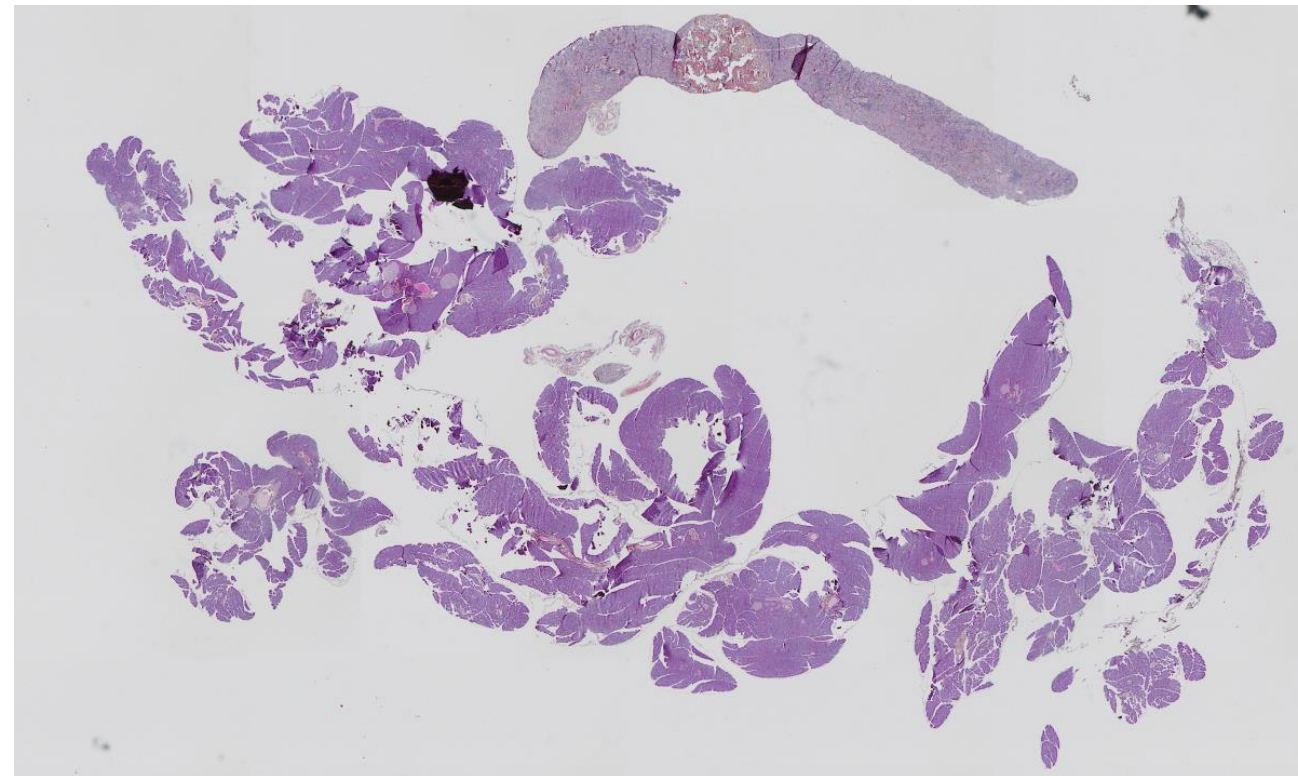

## Mouse 24

- Surgery date: 20.08.19
  - Age (weeks) 31
  - Weight (g) 23.6
  - Tumor fragment P17-1B
  - Fragment size 3 x 3 mm
  - Ear mark 2

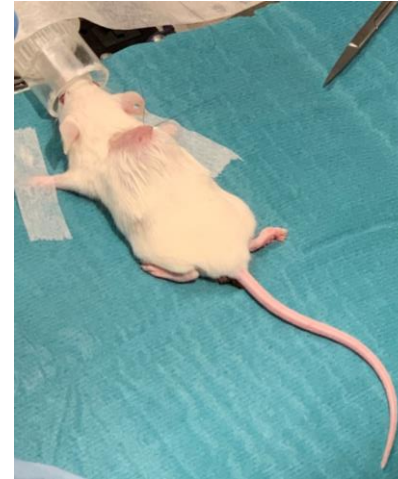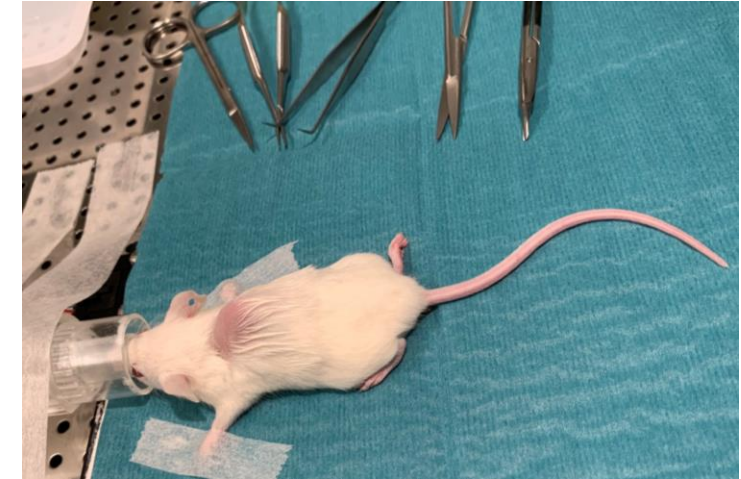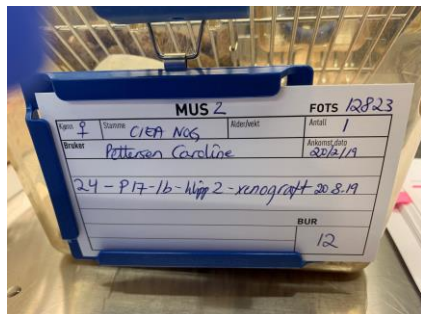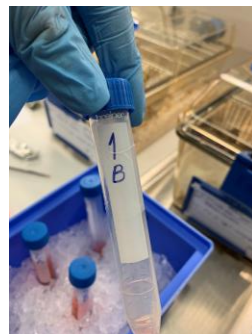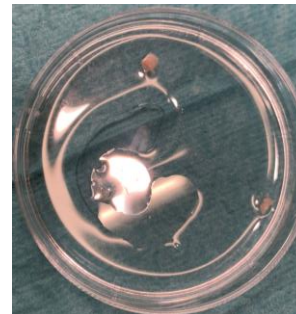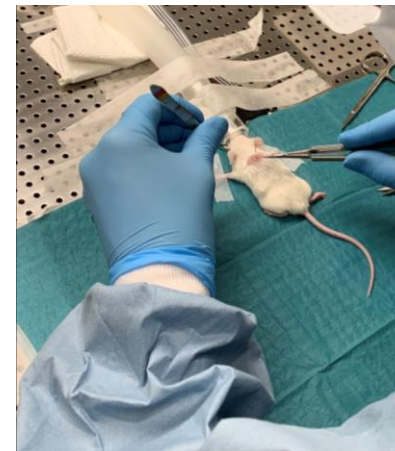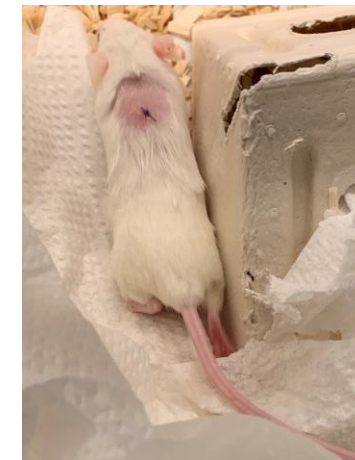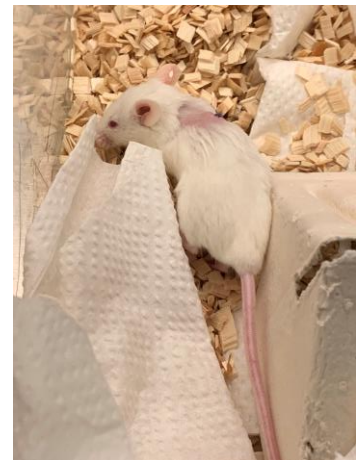

**Supplementary figure 1-24-1. Pictures from the engraftment day**



Supplementary figure 1-24-2. Pictures from follow up and tumor size measurement

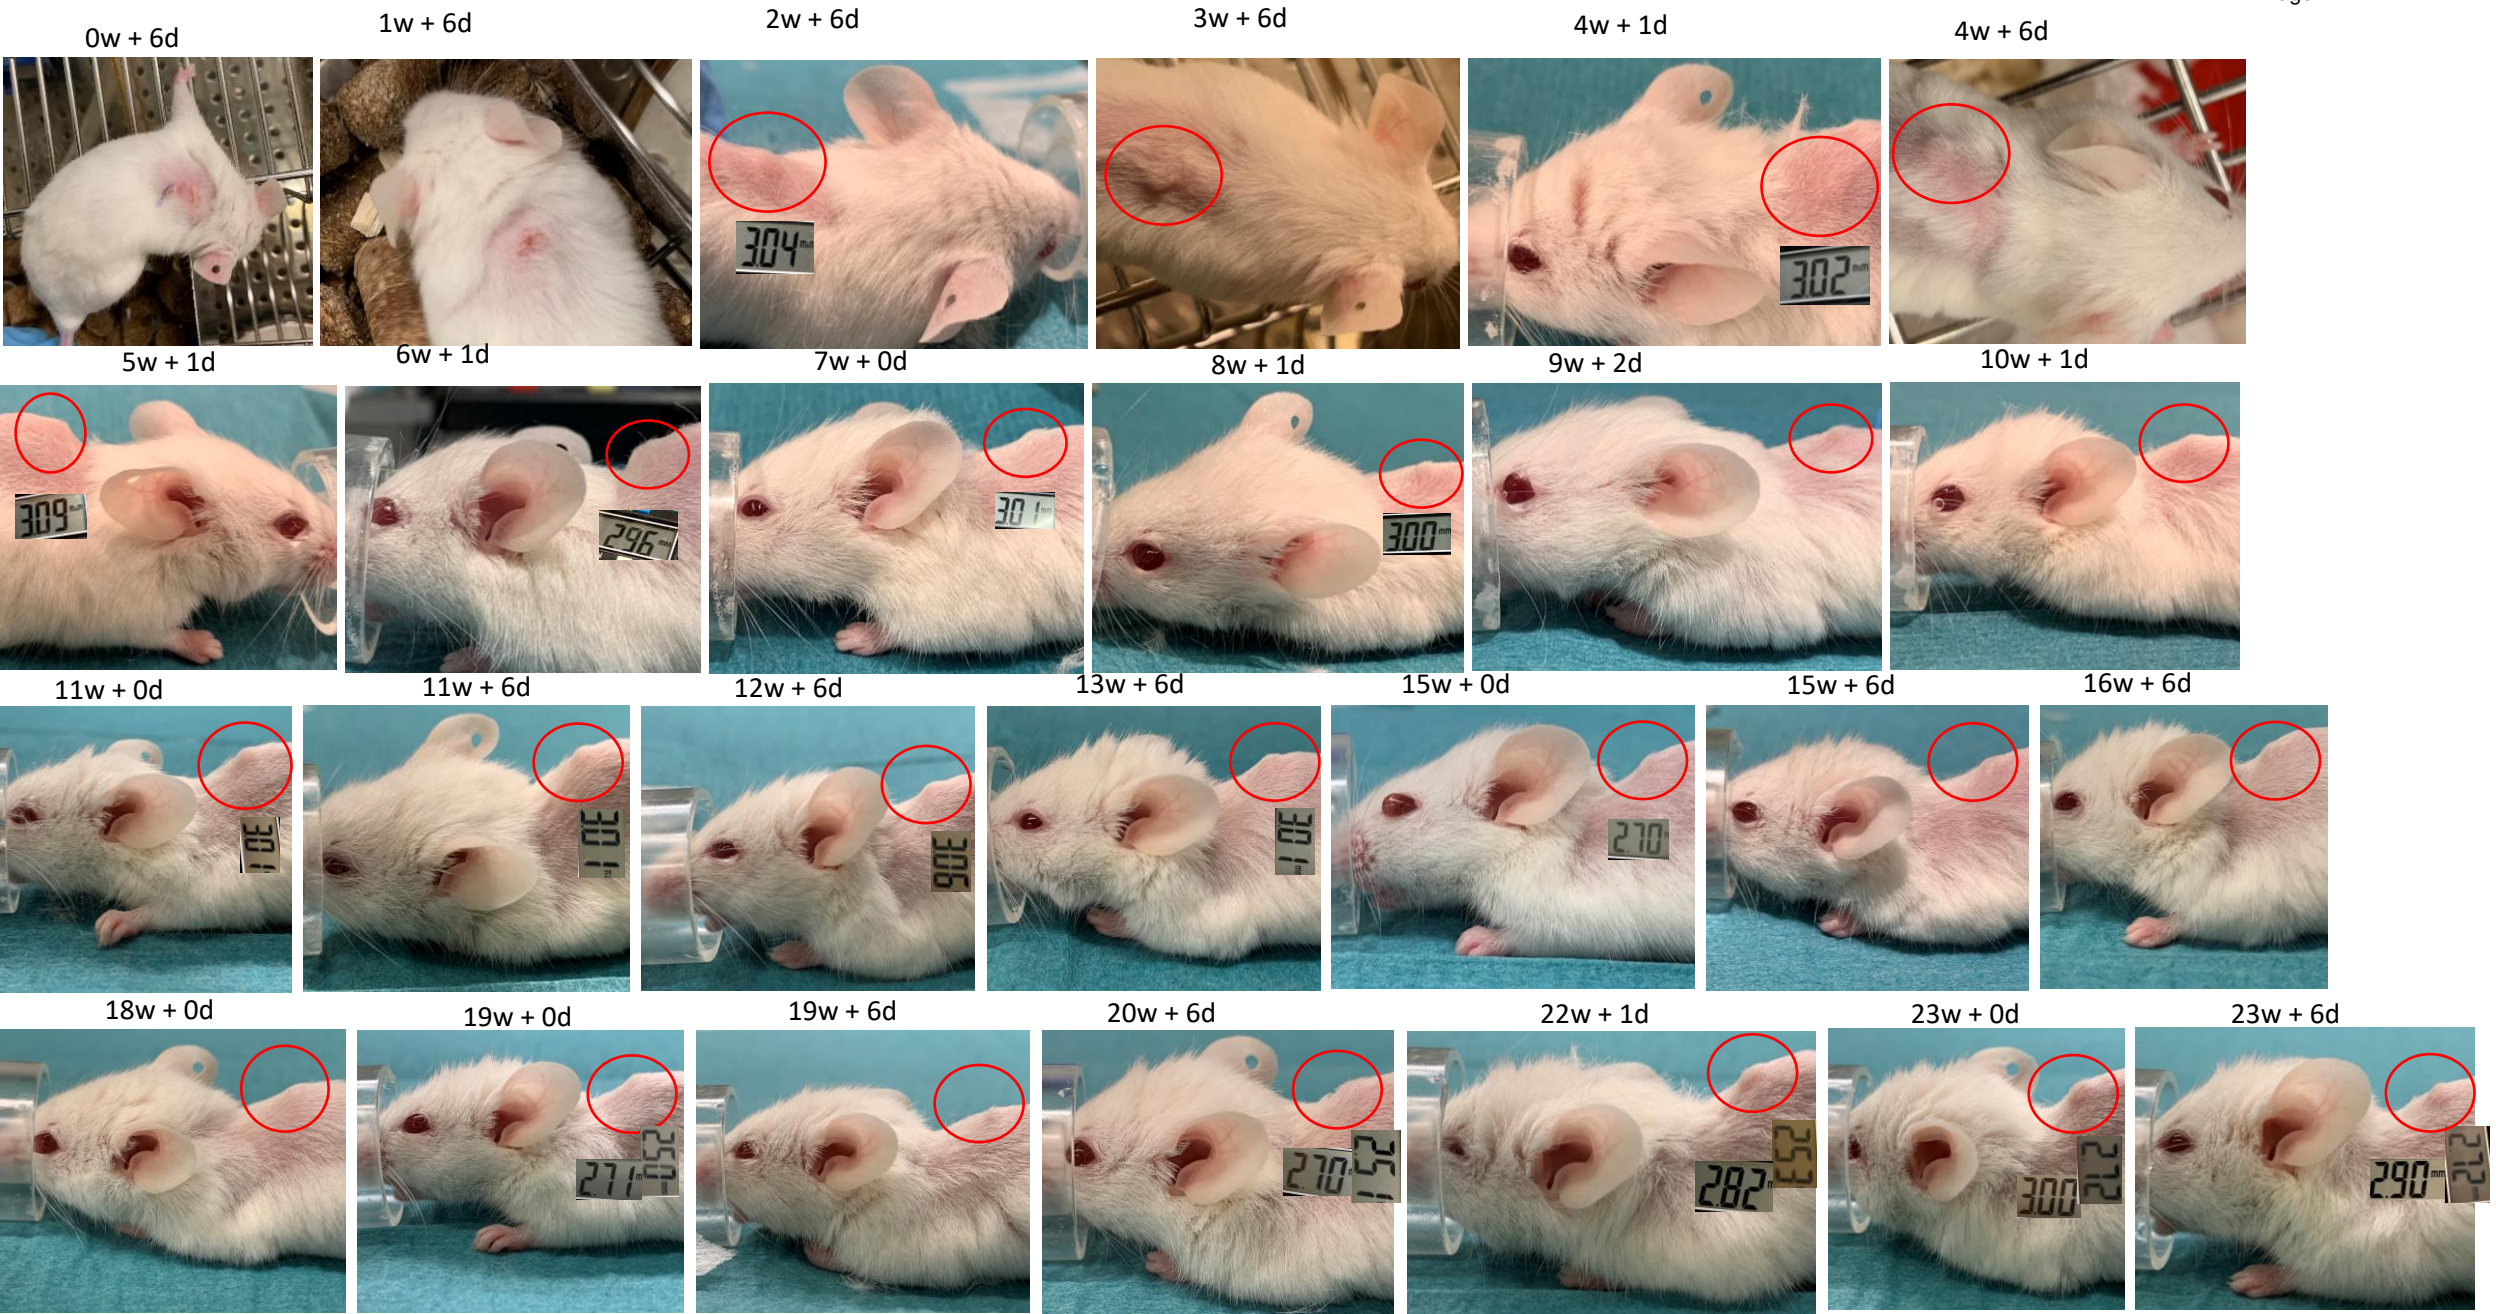



Supplementary figure 1-24-2. Pictures from follow up and tumor size measurement

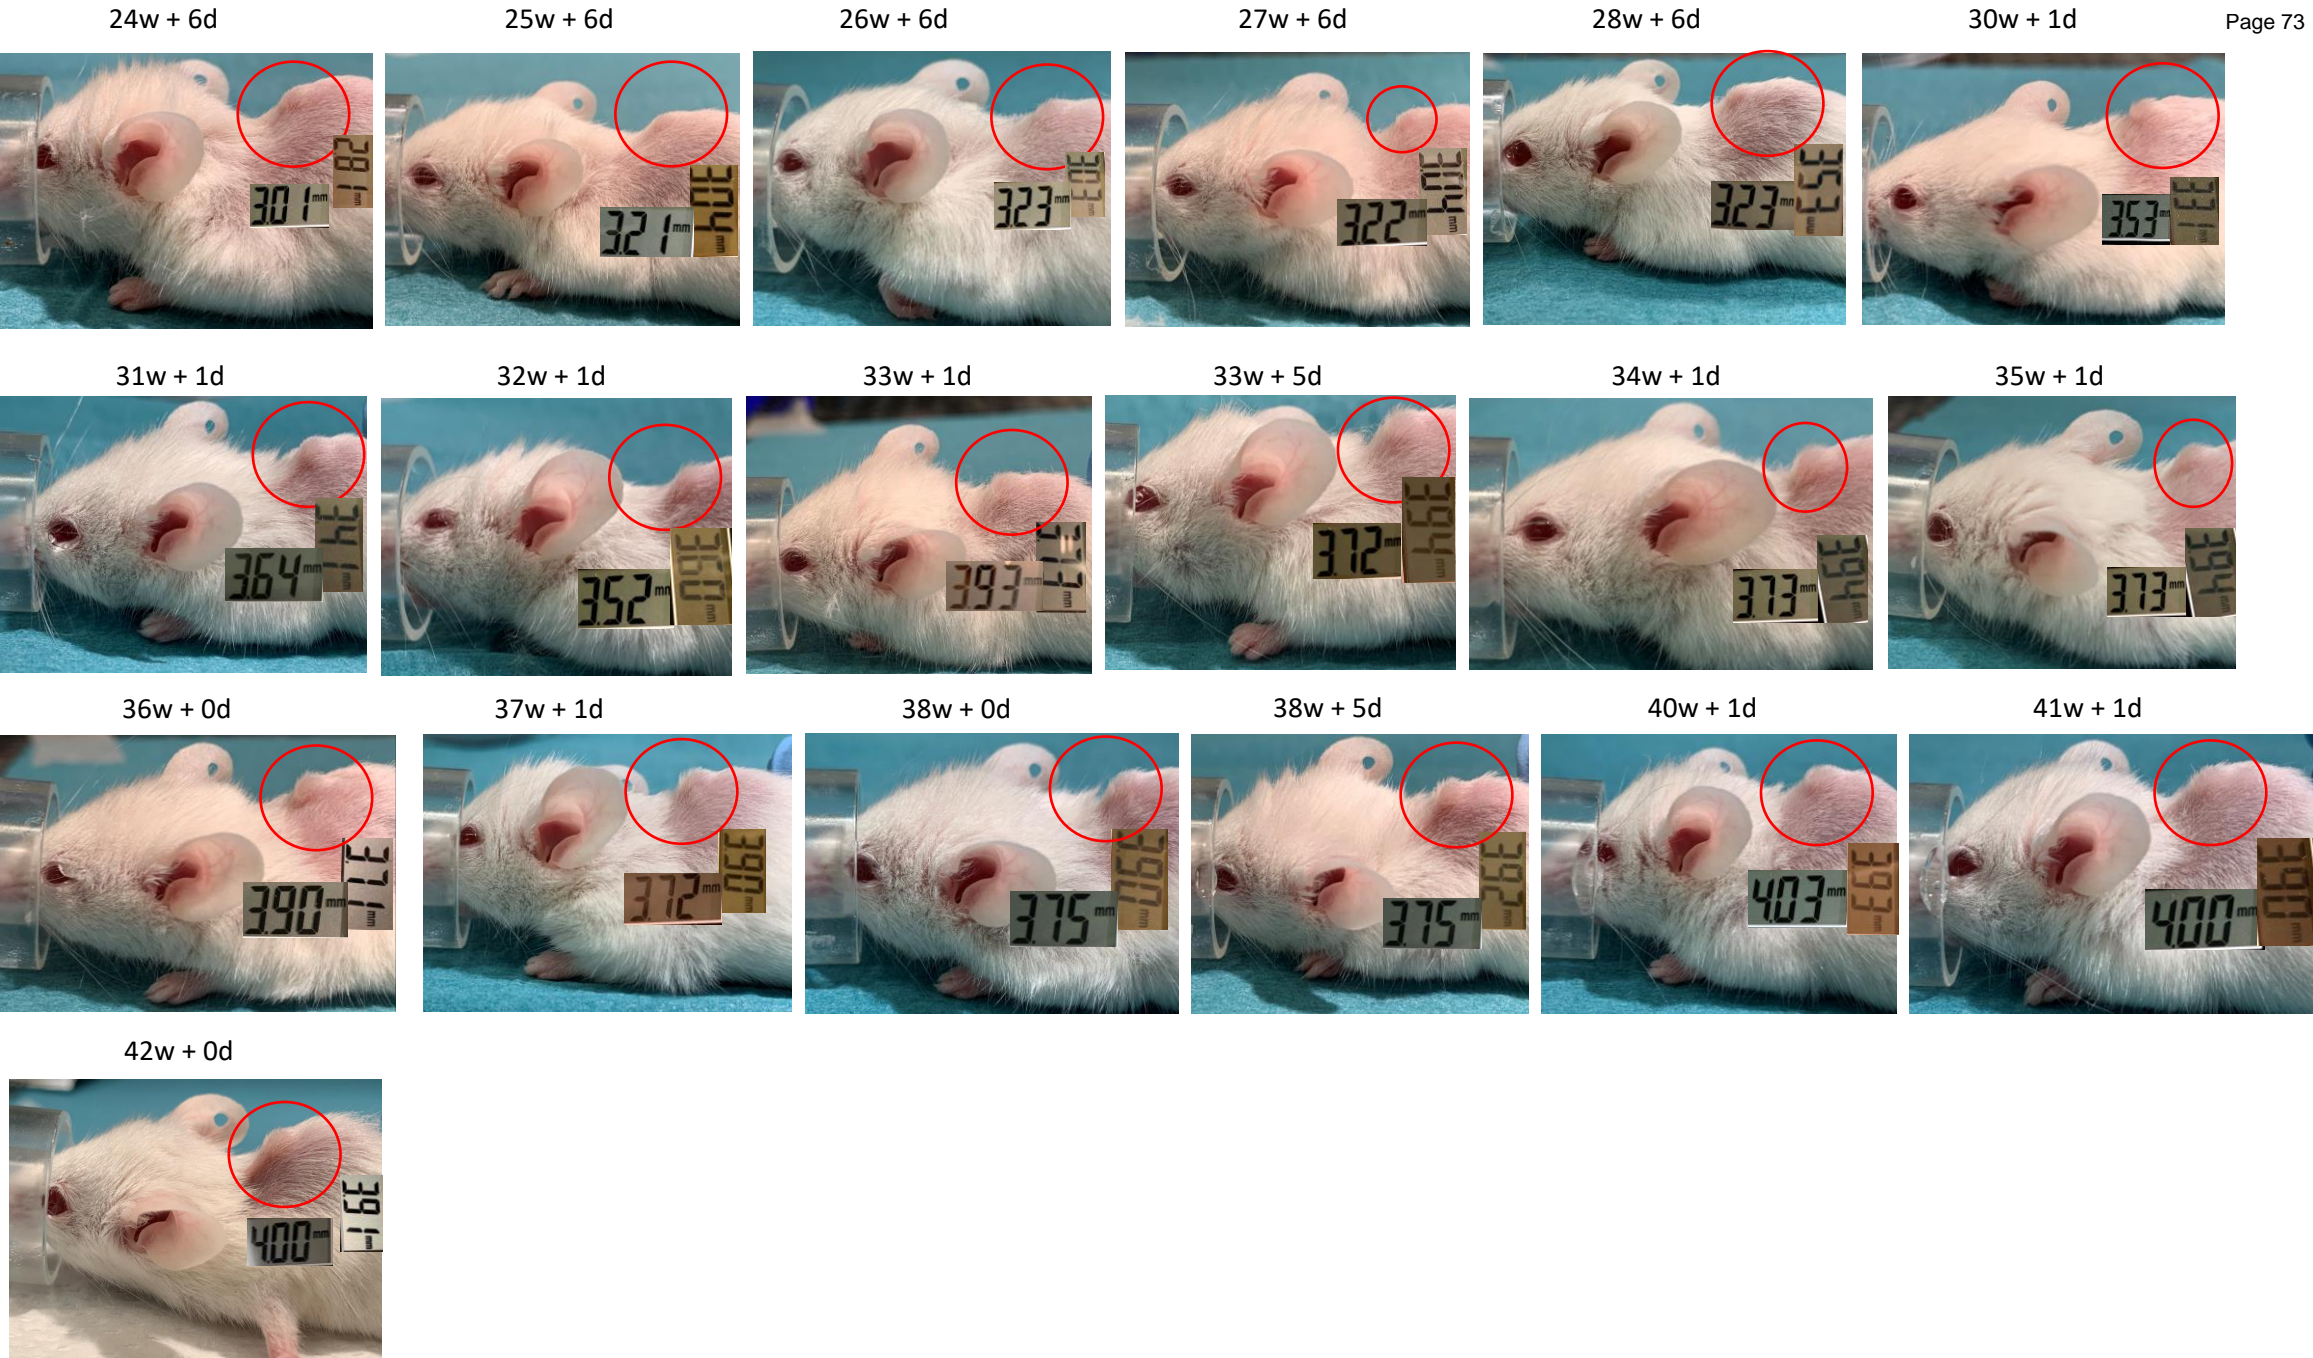



Supplementary figure 1-24-3. Pictures from euthanization

- No treatment given; Did not pass tumor size indicating treatment start
- Necroscopy
  - Xenograft size
  - Blood sample
    - Blood card and plasma
  - Tumor tissue for
    - Histology (only for histology due to small xenograft size)

Prosedyre for avlivning og påfølgende prøvetaking av CIA NOG mus

Human endepunkter:

- 8 ukers behandling med Smartfish eller Placebo
- Tumor volum ~1500 mm<sup>3</sup> eller 10 % tap av kroppsvekt

Prosedyre:

- Vel musen og noter vekten 21.4g
- Legg mus i anestesibur med isofluran 2%
- Legg musen på varmeteppe med operasjonsduk og anestesimaske
- Barber og vask tumorområdet
- Mål tumorstørrelse
- Vask og barber området for inngrep
- Åpne abdomen/brysthulen
- Blod (50 µL) samles i pipettespiss og settes direkte på blodkort.
  - Merk blodkort med navn på mus og dato
- Tapp blod fra hjertet i EDTA rør
- Kutt aorta
- Sett på troppe på EDTA rør og bland innholdet
- Sentrifuger røret på 4C, 3000 rpm, 10 min
- Bruk skalpell til å skjære ut tumoren
  - Fjern nekrotisk vev/bindevev
  - Ta ut 3 biter
    - 4x4x4 mm til IHC i rør med 4% formalin (sentrifugerør m/blå topp, oppbevares på romtemperatur i skap inntil levering til kjernefasiliteten)
    - 4x4x4 mm til RNA-sekvensering i cryorør (rør med 5 x volum RNA later, kjøleskap 4°C over natt, ta av RNA later, legg i nytt cryorør og frys på -80°C)
    - 4x4x4 til proteinisolering i cryorør (snapfreez N<sub>2</sub>, deretter frys på -80°C)
- Resten av tumoren fryses ned i cryorør (1-3 avhengig av størrelse, (snapfreez N<sub>2</sub>, deretter frys på -80°C)
- Pipetter av plasmaet som er øverst i røret, uten å få med blodceller
- Fordel plasma i 2 x 500 µl eppendorfrør
- Merk plasmarøret godt (mus nr, plasma, dato, initialer, og frys det på -80C (egen boks merket Caroline Pettersen «plasma etter behandling»)
- La blodkortet tørke i romtemp i 2 timer
- La blodkort i zip-plastpose på -80°C (press ut luft)
- Frys blodkort i zip-plastpose på -80°C (press ut luft)

EDTA plasma

Blodkort

Protein

Immunohistochemistry

RNA sequencing



AUTOPSY CARD

|                                                                       |                                |                              |                            |                                        |
|-----------------------------------------------------------------------|--------------------------------|------------------------------|----------------------------|----------------------------------------|
| NUMBER<br>24 - (P17-1b) - ear cut 2                                   | Male<br>Female<br>X            | STRAIN<br>CIA NOG            | BIRTH DATE<br>January 2019 | EXPERIMENT<br>PDX - Xenograft          |
| AGE AT DEATH                                                          | DEATH MODE<br>DATE<br>11.06.20 | GROUP<br>Pettersen, Caroline |                            |                                        |
| CLINICAL SYMPTOMS AT DEATH<br>xenograft not growing<br>reduced weight |                                |                              |                            |                                        |
| ORGAN WEIGHT                                                          |                                | SECTION TAKEN                |                            |                                        |
| ORGAN                                                                 | WEIGHT                         | ORGAN                        | YES                        | GROSS OBSERVATION                      |
| Femur                                                                 |                                | 1) Lung + Heart (LH)         | ✓                          | lungs filled with formalin             |
| Liver                                                                 |                                | 2) Liver (L)                 | ✓                          |                                        |
|                                                                       |                                | 3) Kidney (N)                | ✓                          |                                        |
|                                                                       |                                | 4) Adrenal                   |                            |                                        |
| Spleen                                                                |                                | 5) Testis/Ovary              |                            | Pass i livmor                          |
|                                                                       |                                | 6) Spleen + pancreas (MP)    | ✓                          | Small spleen < 1cm                     |
| Kidney                                                                |                                | 7) Lymph nodes               |                            |                                        |
|                                                                       |                                | 8) Bone marrow               |                            |                                        |
| Testis/Ovary                                                          |                                | 9) Xenograft (X)             | ✓                          | Small ~3mm, only sampled for histology |
|                                                                       |                                | 10) Thymus (T)               | ✓                          |                                        |
|                                                                       |                                | 11) 2nd tumor right (TR)     |                            |                                        |
|                                                                       |                                | 12) 2nd tumor left (TL)      |                            |                                        |
|                                                                       |                                | 13)                          |                            |                                        |

Notes: Blood card ✓  
Blood plasma ✓  
Pictures ✓  
Weight: 21.4g  
Tumor size 39/4.0

| MUS 1                                                |                |            |          | FOTS 12823           |
|------------------------------------------------------|----------------|------------|----------|----------------------|
| Kjønn ♀                                              | Stamme CIA NOG | Alder/vekt | Antall 1 |                      |
| Bruker Pettersen Caroline                            |                |            |          | Ankomst dato 20/2/19 |
| <del>23 - P17-1a - klipp 1 - xenograft 20.8.19</del> |                |            |          |                      |
| <del>24 - P17-1b - klipp 2 - 11 - BUR</del>          |                |            |          |                      |
| <del>25 - P17-2a - klipp 3 - 11 -</del>              |                |            |          |                      |
| <del>26 - P17-2b - klipp 4 - 11 -</del>              |                |            |          |                      |
|                                                      |                |            |          | 11                   |

Autopsy card modified from: [http://www.pathbase.net/Necropsy\\_of\\_the\\_Mouse/](http://www.pathbase.net/Necropsy_of_the_Mouse/)



Supplementary figure 1-24-3. Pictures from euthanization (11.06.20)

- \*Xenograft slow growth
- \*3 months since animals with not growing xenografts were euthanized

|                                           |                 |                      |              |
|-------------------------------------------|-----------------|----------------------|--------------|
| MUS 1                                     |                 | FOTS 12823           |              |
| Kjønn ♀                                   | Stamme CIEA NOG | Alder/vekt           | Antall 1 2 3 |
| Bruker Pettersen Caroline                 |                 | Ankomst dato 20/2/19 |              |
| 23 - P17-1a - klipp 1 - xenograft 20.8.17 |                 |                      |              |
| 24 - P17-1b - klipp 2 - 11-               |                 |                      |              |
| 25 - P17-2a - klipp 3 - 11-               |                 |                      |              |
| 26 - P17-2b - klipp 4 - 11-               |                 |                      |              |
|                                           |                 | BUR                  | 11           |

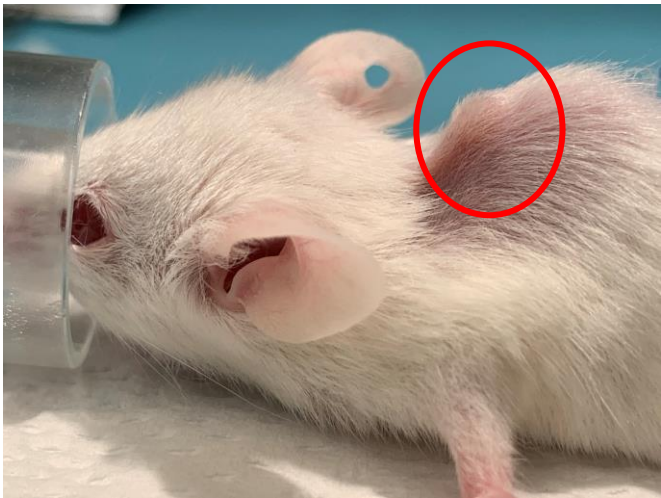

Xenograft (3.9 \* 4.0 mm)

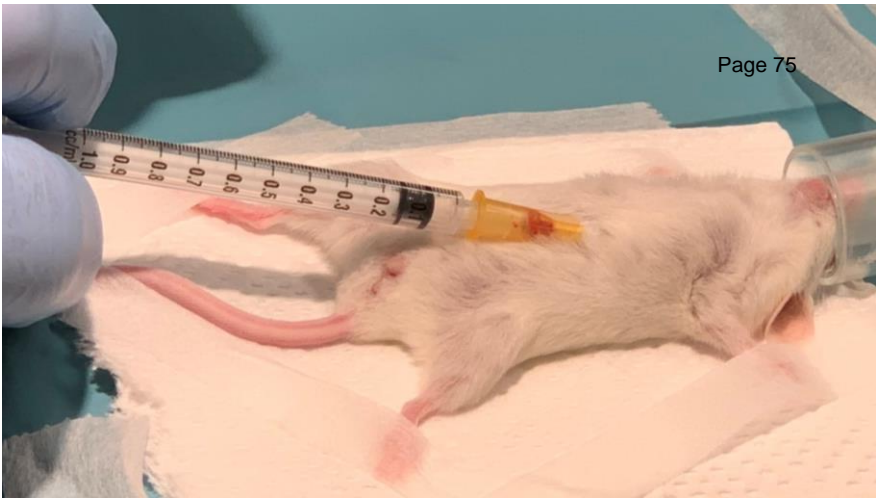

Blood draining

503™ Protein Saver Card  
Not for use in diagnostic procedures

↑ Tuck Cover Here ↑

Name Mus 24 (P17-1b)

Date 11.06.20

onSAS CHP

Bloodcard

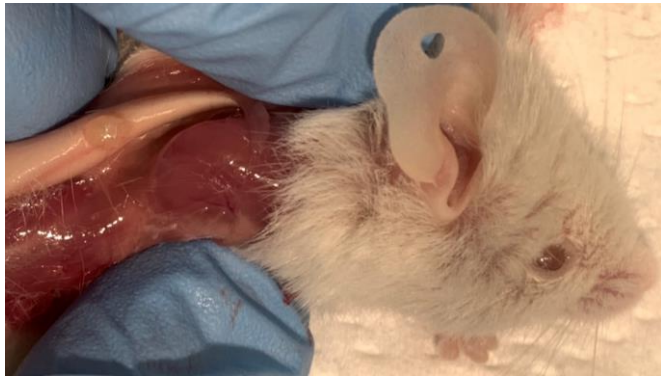

Xenograft

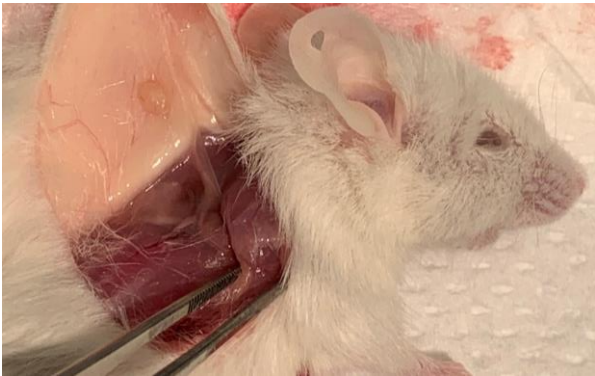

Xenograft

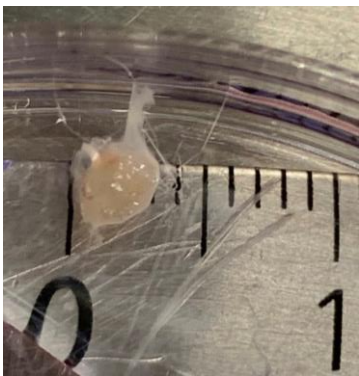

Xenograft

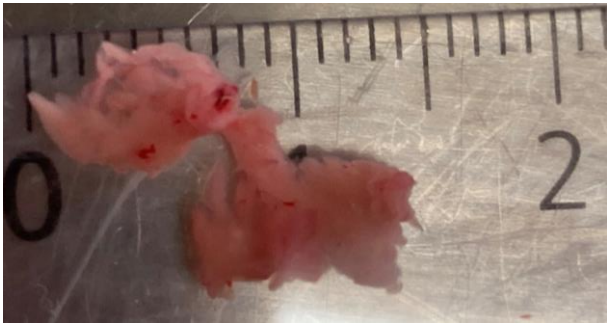

Pancreas

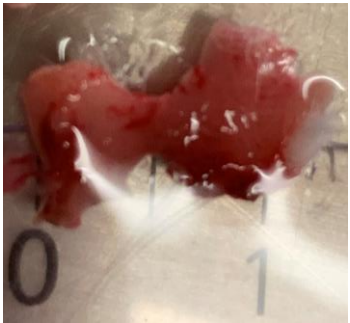

Thymus

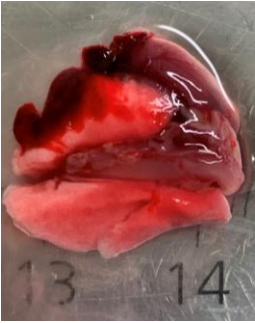

Lungs and heart

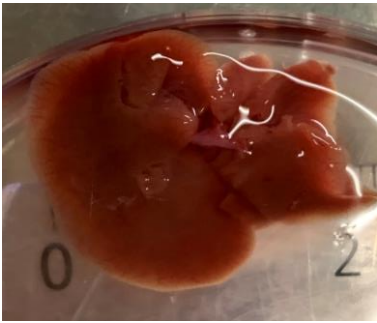

Liver

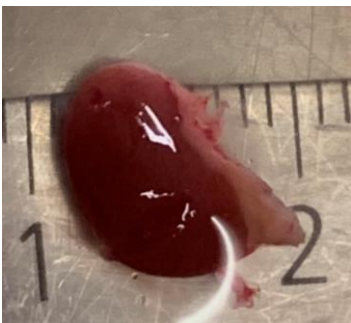

Kidney

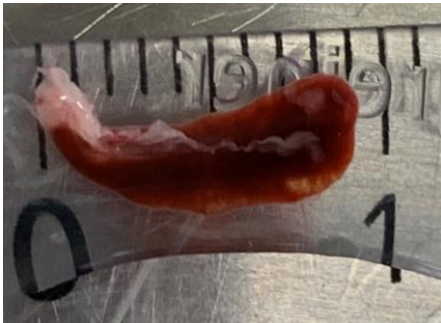

Spleen



Supplementary figure 1-24-4. Score sheets

NTNU Score sheet FOTS: Avdeling for komparativ medisin (AKM) Responsible researcher: Pettersen Animal ID: (P17-16) (24) Wipf (2)

| Parameter                                               | State                                        | Assessment scale | Date | Date | Date | Date | Date | Date | Date | Date  | Date  | Date  |
|---------------------------------------------------------|----------------------------------------------|------------------|------|------|------|------|------|------|------|-------|-------|-------|
| General appearance                                      | Normal                                       | 0                | 20/9 | 24/9 | 27/9 | 29/9 | 4/10 | 6/10 | 9/10 | 11/10 | 13/10 | 16/10 |
|                                                         | Reduced grooming                             | 1                |      |      |      |      |      |      |      |       |       |       |
|                                                         | Minor distention of abdomen, rough hair coat | 3                |      |      |      |      |      |      |      |       |       |       |
|                                                         | Hunchback or distended abdomen, inactive     | 18               |      |      |      |      |      |      |      |       |       |       |
| Behaviour (Level of activity)                           | Normal                                       | 0                |      |      |      |      |      |      |      |       |       |       |
|                                                         | Slightly reduced                             | 1                |      |      |      |      |      |      |      |       |       |       |
|                                                         | Moderately reduced                           | 3                |      |      |      |      |      |      |      |       |       |       |
|                                                         | Distressed behaviour due to growing tumour   | 3                |      |      |      |      |      |      |      |       |       |       |
|                                                         | Obviously reduced                            | 5                |      |      |      |      |      |      |      |       |       |       |
|                                                         | Isolated, inactive, lethargic                | 18               |      |      |      |      |      |      |      |       |       |       |
| Body weight (Compared to body weight before experiment) | Body weight:                                 |                  | 23,8 | 22,7 | 22,7 | 5    | 23,6 | 22,9 | 20,5 | 22    | 22,1  |       |
|                                                         | No loss                                      | 0                |      |      |      |      |      |      |      |       |       |       |
|                                                         | Loss < 5%                                    | 1                |      |      |      |      |      |      |      |       |       |       |
|                                                         | Loss 5-9%                                    | 3                |      |      |      |      |      |      |      |       |       |       |
|                                                         | Loss 10-14%                                  | 5                |      |      |      |      |      |      |      |       |       |       |
|                                                         | Loss > 15%                                   | 18               |      |      |      |      |      |      |      |       |       |       |
| Clinical signs (Infection, bleeding, discoloration)     | Normal                                       | 0                |      |      |      |      |      |      |      |       |       |       |
|                                                         | Minor irritation around surgical wound       | 1                |      |      |      |      |      |      |      |       |       |       |
|                                                         | Moderate irritation/infected surgical wound  | 3                |      |      |      |      |      |      |      |       |       |       |
|                                                         | Infected/open surgical wound                 | 4*               |      |      |      |      |      |      |      |       |       |       |
|                                                         | Tumour > 1,0 cm in diameter                  | 10               |      |      |      |      |      |      |      |       |       |       |
|                                                         | Tumour > 1,5 cm in diameter                  | 18               |      |      |      |      |      |      |      |       |       |       |
| Ulcerous tumour                                         | 18                                           |                  |      |      |      |      |      |      |      |       |       |       |

Total: 22,1

Comments, treatments etc:

0-3: Normal  
4-9: Pay attention to health state and consider treatment  
10-13: Pay close attention to health state, consider treatment or euthanasia  
14-18: Euthanasia \*Start treatment with antibiotics. If no effect within 3 days, euthanize the animal

NTNU Score sheet FOTS: Avdeling for komparativ medisin (AKM) Responsible researcher: Pettersen Animal ID: (P17-16) (24) Wipf (2)

| Parameter                                               | State                                        | Assessment scale | Date | Date | Date | Date | Date | Date | Date | Date  | Date  | Date  |
|---------------------------------------------------------|----------------------------------------------|------------------|------|------|------|------|------|------|------|-------|-------|-------|
| General appearance                                      | Normal                                       | 0                | 20/9 | 23/9 | 25/9 | 30/9 | 2/10 | 4/10 | 8/10 | 10/10 | 14/10 | 18/10 |
|                                                         | Reduced grooming                             | 1                |      |      |      |      |      |      |      |       |       |       |
|                                                         | Minor distention of abdomen, rough hair coat | 3                |      |      |      |      |      |      |      |       |       |       |
|                                                         | Hunchback or distended abdomen, inactive     | 18               |      |      |      |      |      |      |      |       |       |       |
| Behaviour (Level of activity)                           | Normal                                       | 0                |      |      |      |      |      |      |      |       |       |       |
|                                                         | Slightly reduced                             | 1                |      |      |      |      |      |      |      |       |       |       |
|                                                         | Moderately reduced                           | 3                |      |      |      |      |      |      |      |       |       |       |
|                                                         | Distressed behaviour due to growing tumour   | 3                |      |      |      |      |      |      |      |       |       |       |
|                                                         | Obviously reduced                            | 5                |      |      |      |      |      |      |      |       |       |       |
|                                                         | Isolated, inactive, lethargic                | 18               |      |      |      |      |      |      |      |       |       |       |
| Body weight (Compared to body weight before experiment) | Body weight:                                 |                  | 23,1 | 23,5 | 22,5 | 23,0 | 22,7 | 22,3 | 21,2 | 21,7  | 21,3  |       |
|                                                         | No loss                                      | 0                |      |      |      |      |      |      |      |       |       |       |
|                                                         | Loss < 5%                                    | 1                |      |      |      |      |      |      |      |       |       |       |
|                                                         | Loss 5-9%                                    | 3                |      |      |      |      |      |      |      |       |       |       |
|                                                         | Loss 10-14%                                  | 5                |      |      |      |      |      |      |      |       |       |       |
|                                                         | Loss > 15%                                   | 18               |      |      |      |      |      |      |      |       |       |       |
| Clinical signs (Infection, bleeding, discoloration)     | Normal                                       | 0                |      |      |      |      |      |      |      |       |       |       |
|                                                         | Minor irritation around surgical wound       | 1                |      |      |      |      |      |      |      |       |       |       |
|                                                         | Moderate irritation/infected surgical wound  | 3                |      |      |      |      |      |      |      |       |       |       |
|                                                         | Infected/open surgical wound                 | 4*               |      |      |      |      |      |      |      |       |       |       |
|                                                         | Tumour > 1,0 cm in diameter                  | 10               |      |      |      |      |      |      |      |       |       |       |
|                                                         | Tumour > 1,5 cm in diameter                  | 18               |      |      |      |      |      |      |      |       |       |       |
| Ulcerous tumour                                         | 18                                           |                  |      |      |      |      |      |      |      |       |       |       |

Total: 21,3

Comments, treatments etc:

0-3: Normal  
4-9: Pay attention to health state and consider treatment  
10-13: Pay close attention to health state, consider treatment or euthanasia  
14-18: Euthanasia \*Start treatment with antibiotics. If no effect within 3 days, euthanize the animal

NTNU Score sheet FOTS: Avdeling for komparativ medisin (AKM) Responsible researcher: Pettersen Animal ID: (P17-16) (24) Wipf (2)

| Parameter                                               | State                                        | Assessment scale | Date  | Date  | Date  | Date  | Date  | Date  | Date | Date | Date | Date  |
|---------------------------------------------------------|----------------------------------------------|------------------|-------|-------|-------|-------|-------|-------|------|------|------|-------|
| General appearance                                      | Normal                                       | 0                | 16/10 | 18/10 | 21/10 | 23/10 | 26/10 | 29/10 | 1/11 | 4/11 | 6/11 | 13/11 |
|                                                         | Reduced grooming                             | 1                |       |       |       |       |       |       |      |      |      |       |
|                                                         | Minor distention of abdomen, rough hair coat | 3                |       |       |       |       |       |       |      |      |      |       |
|                                                         | Hunchback or distended abdomen, inactive     | 18               |       |       |       |       |       |       |      |      |      |       |
| Behaviour (Level of activity)                           | Normal                                       | 0                |       |       |       |       |       |       |      |      |      |       |
|                                                         | Slightly reduced                             | 1                |       |       |       |       |       |       |      |      |      |       |
|                                                         | Moderately reduced                           | 3                |       |       |       |       |       |       |      |      |      |       |
|                                                         | Distressed behaviour due to growing tumour   | 3                |       |       |       |       |       |       |      |      |      |       |
|                                                         | Obviously reduced                            | 5                |       |       |       |       |       |       |      |      |      |       |
|                                                         | Isolated, inactive, lethargic                | 18               |       |       |       |       |       |       |      |      |      |       |
| Body weight (Compared to body weight before experiment) | Body weight:                                 |                  | 21,3  | 22,2  | 21,7  | 23    | 23,9  | 28,4  | 22   | 20,5 | 22,8 | 22,6  |
|                                                         | No loss                                      | 0                |       |       |       |       |       |       |      |      |      |       |
|                                                         | Loss < 5%                                    | 1                |       |       |       |       |       |       |      |      |      |       |
|                                                         | Loss 5-9%                                    | 3                |       |       |       |       |       |       |      |      |      |       |
|                                                         | Loss 10-14%                                  | 5                |       |       |       |       |       |       |      |      |      |       |
|                                                         | Loss > 15%                                   | 18               |       |       |       |       |       |       |      |      |      |       |
| Clinical signs (Infection, bleeding, discoloration)     | Normal                                       | 0                |       |       |       |       |       |       |      |      |      |       |
|                                                         | Minor irritation around surgical wound       | 1                |       |       |       |       |       |       |      |      |      |       |
|                                                         | Moderate irritation/infected surgical wound  | 3                |       |       |       |       |       |       |      |      |      |       |
|                                                         | Infected/open surgical wound                 | 4*               |       |       |       |       |       |       |      |      |      |       |
|                                                         | Tumour > 1,0 cm in diameter                  | 10               |       |       |       |       |       |       |      |      |      |       |
|                                                         | Tumour > 1,5 cm in diameter                  | 18               |       |       |       |       |       |       |      |      |      |       |
| Ulcerous tumour                                         | 18                                           |                  |       |       |       |       |       |       |      |      |      |       |

Total: 22,6

Comments, treatments etc:

0-3: Normal  
4-9: Pay attention to health state and consider treatment  
10-13: Pay close attention to health state, consider treatment or euthanasia  
14-18: Euthanasia \*Start treatment with antibiotics. If no effect within 3 days, euthanize the animal

NTNU Score sheet FOTS: Avdeling for komparativ medisin (AKM) Responsible researcher: Pettersen Animal ID: (P17-16) (24) Wipf (2)

| Parameter                                               | State                                        | Assessment scale | Date  | Date  | Date  | Date  | Date  | Date  | Date | Date | Date | Date  |
|---------------------------------------------------------|----------------------------------------------|------------------|-------|-------|-------|-------|-------|-------|------|------|------|-------|
| General appearance                                      | Normal                                       | 0                | 15/11 | 18/11 | 20/11 | 25/11 | 27/11 | 29/11 | 2/12 | 5/12 | 9/12 | 11/12 |
|                                                         | Reduced grooming                             | 1                |       |       |       |       |       |       |      |      |      |       |
|                                                         | Minor distention of abdomen, rough hair coat | 3                |       |       |       |       |       |       |      |      |      |       |
|                                                         | Hunchback or distended abdomen, inactive     | 18               |       |       |       |       |       |       |      |      |      |       |
| Behaviour (Level of activity)                           | Normal                                       | 0                |       |       |       |       |       |       |      |      |      |       |
|                                                         | Slightly reduced                             | 1                |       |       |       |       |       |       |      |      |      |       |
|                                                         | Moderately reduced                           | 3                |       |       |       |       |       |       |      |      |      |       |
|                                                         | Distressed behaviour due to growing tumour   | 3                |       |       |       |       |       |       |      |      |      |       |
|                                                         | Obviously reduced                            | 5                |       |       |       |       |       |       |      |      |      |       |
|                                                         | Isolated, inactive, lethargic                | 18               |       |       |       |       |       |       |      |      |      |       |
| Body weight (Compared to body weight before experiment) | Body weight:                                 |                  | 22,6  | 23,6  | 22,5  | 23,0  | 23,2  | 23,7  | 21,3 | 21,1 | 23,1 | 23,5  |
|                                                         | No loss                                      | 0                |       |       |       |       |       |       |      |      |      |       |
|                                                         | Loss < 5%                                    | 1                |       |       |       |       |       |       |      |      |      |       |
|                                                         | Loss 5-9%                                    | 3                |       |       |       |       |       |       |      |      |      |       |
|                                                         | Loss 10-14%                                  | 5                |       |       |       |       |       |       |      |      |      |       |
|                                                         | Loss > 15%                                   | 18               |       |       |       |       |       |       |      |      |      |       |
| Clinical signs (Infection, bleeding, discoloration)     | Normal                                       | 0                |       |       |       |       |       |       |      |      |      |       |
|                                                         | Minor irritation around surgical wound       | 1                |       |       |       |       |       |       |      |      |      |       |
|                                                         | Moderate irritation/infected surgical wound  | 3                |       |       |       |       |       |       |      |      |      |       |
|                                                         | Infected/open surgical wound                 | 4*               |       |       |       |       |       |       |      |      |      |       |
|                                                         | Tumour > 1,0 cm in diameter                  | 10               |       |       |       |       |       |       |      |      |      |       |
|                                                         | Tumour > 1,5 cm in diameter                  | 18               |       |       |       |       |       |       |      |      |      |       |
| Ulcerous tumour                                         | 18                                           |                  |       |       |       |       |       |       |      |      |      |       |

Total: 23,5

Comments, treatments etc:

0-3: Normal  
4-9: Pay attention to health state and consider treatment  
10-13: Pay close attention to health state, consider treatment or euthanasia  
14-18: Euthanasia \*Start treatment with antibiotics. If no effect within 3 days, euthanize the animal

NTNU Score sheet FOTS: Avdeling for komparativ medisin (AKM) Responsible researcher: Pettersen Animal ID: (P17-16) (24) Wipf (2)

| Parameter                                               | State                                        | Assessment scale | Date  | Date  | Date  | Date  | Date  | Date  | Date   | Date   | Date   | Date |
|---------------------------------------------------------|----------------------------------------------|------------------|-------|-------|-------|-------|-------|-------|--------|--------|--------|------|
| General appearance                                      | Normal                                       | 0                | 18/12 | 20/12 | 23/12 | 26/12 | 30/12 | 31/12 | 2/1/13 | 6/1/13 | 8/1/13 | 13/1 |
|                                                         | Reduced grooming                             | 1                |       |       |       |       |       |       |        |        |        |      |
|                                                         | Minor distention of abdomen, rough hair coat | 3                |       |       |       |       |       |       |        |        |        |      |
|                                                         | Hunchback or distended abdomen, inactive     | 18               |       |       |       |       |       |       |        |        |        |      |
| Behaviour (Level of activity)                           | Normal                                       | 0                |       |       |       |       |       |       |        |        |        |      |
|                                                         | Slightly reduced                             | 1                |       |       |       |       |       |       |        |        |        |      |
|                                                         | Moderately reduced                           | 3                |       |       |       |       |       |       |        |        |        |      |
|                                                         | Distressed behaviour due to growing tumour   | 3                |       |       |       |       |       |       |        |        |        |      |
|                                                         | Obviously reduced                            | 5                |       |       |       |       |       |       |        |        |        |      |
|                                                         | Isolated, inactive, lethargic                | 18               |       |       |       |       |       |       |        |        |        |      |
| Body weight (Compared to body weight before experiment) | Body weight:                                 |                  | 23,7  | 22,4  | 22,4  | 23,9  | 23,7  | 22,7  | 22,4   | 22,2   | 21,9   | 24   |
|                                                         | No loss                                      | 0                |       |       |       |       |       |       |        |        |        |      |
|                                                         | Loss < 5%                                    | 1                |       |       |       |       |       |       |        |        |        |      |
|                                                         | Loss 5-9%                                    | 3                |       |       |       |       |       |       |        |        |        |      |
|                                                         | Loss 10-14%                                  | 5                |       |       |       |       |       |       |        |        |        |      |
|                                                         | Loss > 15%                                   | 18               |       |       |       |       |       |       |        |        |        |      |
| Clinical signs (Infection, bleeding, discoloration)     | Normal                                       | 0                |       |       |       |       |       |       |        |        |        |      |
|                                                         | Minor irritation around surgical wound       | 1                |       |       |       |       |       |       |        |        |        |      |
|                                                         | Moderate irritation/infected surgical wound  | 3                |       |       |       |       |       |       |        |        |        |      |
|                                                         | Infected/open surgical wound                 | 4*               |       |       |       |       |       |       |        |        |        |      |
|                                                         | Tumour > 1,0 cm in diameter                  | 10               |       |       |       |       |       |       |        |        |        |      |
|                                                         | Tumour > 1,5 cm in diameter                  | 18               |       |       |       |       |       |       |        |        |        |      |
| Ulcerous tumour                                         | 18                                           |                  |       |       |       |       |       |       |        |        |        |      |

Total: 24

Comments, treatments etc:

0-3: Normal  
4-9: Pay attention to health state and consider treatment  
10-13: Pay close attention to health state, consider treatment or euthanasia  
14-18: Euthanasia \*Start treatment with antibiotics. If no effect within 3 days, euthanize the animal

NTNU Score sheet FOTS: Avdeling for komparativ medisin (AKM) Responsible researcher: Pettersen Animal ID: (P17-16) (24) Wipf (2)

| Parameter                                               | State                                        | Assessment scale | Date | Date | Date | Date | Date | Date | Date | Date | Date | Date |
|---------------------------------------------------------|----------------------------------------------|------------------|------|------|------|------|------|------|------|------|------|------|
| General appearance                                      | Normal                                       | 0                | 20/1 | 22/1 | 24/1 | 27/1 | 29/1 | 30/1 | 3/2  | 5/2  | 7/2  | 11/2 |
|                                                         | Reduced grooming                             | 1                |      |      |      |      |      |      |      |      |      |      |
|                                                         | Minor distention of abdomen, rough hair coat | 3                |      |      |      |      |      |      |      |      |      |      |
|                                                         | Hunchback or distended abdomen, inactive     | 18               |      |      |      |      |      |      |      |      |      |      |
| Behaviour (Level of activity)                           | Normal                                       | 0                |      |      |      |      |      |      |      |      |      |      |
|                                                         | Slightly reduced                             | 1                |      |      |      |      |      |      |      |      |      |      |
|                                                         | Moderately reduced                           | 3                |      |      |      |      |      |      |      |      |      |      |
|                                                         | Distressed behaviour due to growing tumour   | 3                |      |      |      |      |      |      |      |      |      |      |
|                                                         | Obviously reduced                            | 5                |      |      |      |      |      |      |      |      |      |      |
|                                                         | Isolated, inactive, lethargic                | 18               |      |      |      |      |      |      |      |      |      |      |
| Body weight (Compared to body weight before experiment) | Body weight:                                 |                  | 22,8 | 23,7 | 23,8 | 24   | 23,5 | 22,3 | 21,5 | 22   | 22,5 |      |
|                                                         | No loss                                      | 0                |      |      |      |      |      |      |      |      |      |      |
|                                                         | Loss < 5%                                    | 1                |      |      |      |      |      |      |      |      |      |      |
|                                                         | Loss 5-9%                                    | 3                |      |      |      |      |      |      |      |      |      |      |
|                                                         | Loss 10-14%                                  | 5                |      |      |      |      |      |      |      |      |      |      |
|                                                         | Loss > 15%                                   | 18               |      |      |      |      |      |      |      |      |      |      |
| Clinical signs (Infection, bleeding, discoloration)     | Normal                                       | 0                |      |      |      |      |      |      |      |      |      |      |
|                                                         | Minor irritation around surgical wound       | 1                |      |      |      |      |      |      |      |      |      |      |
|                                                         | Moderate irritation/infected surgical wound  | 3                |      |      |      |      |      |      |      |      |      |      |
|                                                         | Infected/open surgical wound                 | 4*               |      |      |      |      |      |      |      |      |      |      |
|                                                         | Tumour > 1,0 cm in diameter                  | 10               |      |      |      |      |      |      |      |      |      |      |
|                                                         | Tumour > 1,5 cm in diameter                  | 18               |      |      |      |      |      |      |      |      |      |      |
| Ulcerous tumour                                         | 18                                           |                  |      |      |      |      |      |      |      |      |      |      |

Total: 22,5

Comments, treatments etc:

0-3: Normal  
4-9: Pay attention to health state and consider treatment  
10-13: Pay close attention to health state, consider treatment or euthanasia  
14-18: Euthanasia \*Start treatment with antibiotics. If no effect within 3 days, euthanize the animal

Supplementary figure 1-24-4. Score sheets

NTNU

Score sheet FOTS:  
Avdeling for komparativ medisin (AKM)

Responsible researcher:  
Pettersen

Animal ID:  
(24)

Wipp  
(2)

| Parameter                                                                                                                                                                                                                                                         | State                                        | Assessment scale | Date | Date  | Date  | Date  | Date  | Date  | Date  | Date  | Date  | Date  | Date  |
|-------------------------------------------------------------------------------------------------------------------------------------------------------------------------------------------------------------------------------------------------------------------|----------------------------------------------|------------------|------|-------|-------|-------|-------|-------|-------|-------|-------|-------|-------|
| General appearance                                                                                                                                                                                                                                                | Normal                                       | 0                | 1/12 | 12/12 | 14/12 | 17/12 | 19/12 | 21/12 | 24/12 | 26/12 | 28/12 | 30/12 | 31/12 |
|                                                                                                                                                                                                                                                                   | Reduced grooming                             | 1                |      |       |       |       |       |       |       |       |       |       |       |
|                                                                                                                                                                                                                                                                   | Minor distention of abdomen, rough hair coat | 3                |      |       |       |       |       |       |       |       |       |       |       |
|                                                                                                                                                                                                                                                                   | Hunchback or distended abdomen, inactive     | 18               |      |       |       |       |       |       |       |       |       |       |       |
| Behaviour (Level of activity)                                                                                                                                                                                                                                     | Normal                                       | 0                |      |       |       |       |       |       |       |       |       |       |       |
|                                                                                                                                                                                                                                                                   | Slightly reduced                             | 1                |      |       |       |       |       |       |       |       |       |       |       |
|                                                                                                                                                                                                                                                                   | Moderately reduced                           | 3                |      |       |       |       |       |       |       |       |       |       |       |
|                                                                                                                                                                                                                                                                   | Distressed behaviour due to growing tumour   | 3                |      |       |       |       |       |       |       |       |       |       |       |
|                                                                                                                                                                                                                                                                   | Obviously reduced                            | 5                |      |       |       |       |       |       |       |       |       |       |       |
|                                                                                                                                                                                                                                                                   | Isolated, inactive, lethargic                | 18               |      |       |       |       |       |       |       |       |       |       |       |
| Body weight (Compared to body weight before experiment)                                                                                                                                                                                                           | Body weight:                                 |                  | 22,5 | 22,7  | 21,7  | 23    | 24,2  | 23,3  | 22,5  | 22,4  | 22,7  | 22,4  | 22,5  |
|                                                                                                                                                                                                                                                                   | No loss                                      | 0                |      |       |       |       |       |       |       |       |       |       |       |
|                                                                                                                                                                                                                                                                   | Loss < 5%                                    | 1                |      |       |       |       |       |       |       |       |       |       |       |
|                                                                                                                                                                                                                                                                   | Loss 5-9%                                    | 3                |      |       |       |       |       |       |       |       |       |       |       |
|                                                                                                                                                                                                                                                                   | Loss 10-14%                                  | 5                |      |       |       |       |       |       |       |       |       |       |       |
| Clinical signs (Infection, bleeding, discoloration)                                                                                                                                                                                                               | Loss > 15%                                   | 18               |      |       |       |       |       |       |       |       |       |       |       |
|                                                                                                                                                                                                                                                                   | Normal                                       | 0                | 2,7  | 2,8   |       |       |       |       |       |       |       |       |       |
|                                                                                                                                                                                                                                                                   | Minor irritation around surgical wound       | 1                |      |       |       |       |       |       |       |       |       |       |       |
|                                                                                                                                                                                                                                                                   | Moderate irritation/infected surgical wound  | 3                |      |       |       |       |       |       |       |       |       |       |       |
|                                                                                                                                                                                                                                                                   | Infected/open surgical wound                 | 4*               | 2,9  | 3,1   | 11    | 3,2   | 3,4   | 3,2   | 3,2   | 3,2   | 3,1   | 3,4   | 3,2   |
|                                                                                                                                                                                                                                                                   | Tumour > 1,0 cm in diameter                  | 10               |      |       |       |       |       |       |       |       |       |       |       |
|                                                                                                                                                                                                                                                                   | Tumour > 1,5 cm in diameter                  | 18               |      |       |       |       |       |       |       |       |       |       |       |
|                                                                                                                                                                                                                                                                   | Ulcerous tumour                              | 18               |      |       |       |       |       |       |       |       |       |       |       |
| Total:                                                                                                                                                                                                                                                            |                                              |                  |      |       |       |       |       |       |       |       |       |       |       |
| Comments, treatments etc:                                                                                                                                                                                                                                         |                                              |                  |      |       |       |       |       |       |       |       |       |       |       |
| 0-3: Normal<br>4-9: Pay attention to health state and consider treatment<br>10-13: Pay close attention to health state, consider treatment or euthanasia<br>14-18: Euthanasia *Start treatment with antibiotics. If no effect within 3 days, euthanize the animal |                                              |                  |      |       |       |       |       |       |       |       |       |       |       |

NTNU

Score sheet FOTS:  
Avdeling for komparativ medisin (AKM)

Responsible researcher:  
Pettersen

Animal ID:  
(24)

Wipp  
(2)

| Parameter                                                                                                                                                                                                                                                         | State                                        | Assessment scale | Date | Date | Date | Date | Date | Date | Date | Date | Date | Date | Date |
|-------------------------------------------------------------------------------------------------------------------------------------------------------------------------------------------------------------------------------------------------------------------|----------------------------------------------|------------------|------|------|------|------|------|------|------|------|------|------|------|
| General appearance                                                                                                                                                                                                                                                | Normal                                       | 0                | 14/4 | 17/4 | 20/4 | 24/4 | 27/4 | 30/4 | 4/5  | 8/5  | 11/5 | 14/5 | 22/5 |
|                                                                                                                                                                                                                                                                   | Reduced grooming                             | 1                |      |      |      |      |      |      |      |      |      |      |      |
|                                                                                                                                                                                                                                                                   | Minor distention of abdomen, rough hair coat | 3                |      |      |      |      |      |      |      |      |      |      |      |
|                                                                                                                                                                                                                                                                   | Hunchback or distended abdomen, inactive     | 18               |      |      |      |      |      |      |      |      |      |      |      |
| Behaviour (Level of activity)                                                                                                                                                                                                                                     | Normal                                       | 0                |      |      |      |      |      |      |      |      |      |      |      |
|                                                                                                                                                                                                                                                                   | Slightly reduced                             | 1                | Fin  | Fin  | Fin  | Fin  |      | Fin  | Fin  | Fin  | Fin  | Fin  | 11   |
|                                                                                                                                                                                                                                                                   | Moderately reduced                           | 3                | form | form | form | form |      | form | form | form | form | form |      |
|                                                                                                                                                                                                                                                                   | Distressed behaviour due to growing tumour   | 3                |      |      |      |      |      |      |      |      |      |      |      |
|                                                                                                                                                                                                                                                                   | Obviously reduced                            | 5                |      |      |      |      |      |      |      |      |      |      |      |
|                                                                                                                                                                                                                                                                   | Isolated, inactive, lethargic                | 18               |      |      |      |      |      |      |      |      |      |      |      |
| Body weight (Compared to body weight before experiment)                                                                                                                                                                                                           | Body weight:                                 |                  | 22,5 | 22,4 | 22,7 | 22,3 | 22,5 | 22,4 | 22,4 | 21,9 | 22,3 |      | 21,3 |
|                                                                                                                                                                                                                                                                   | No loss                                      | 0                |      |      |      |      |      |      |      |      |      |      |      |
|                                                                                                                                                                                                                                                                   | Loss < 5%                                    | 1                |      |      |      |      |      |      |      |      |      |      |      |
|                                                                                                                                                                                                                                                                   | Loss 5-9%                                    | 3                |      |      |      |      |      |      |      |      |      |      |      |
|                                                                                                                                                                                                                                                                   | Loss 10-14%                                  | 5                |      |      |      |      |      |      |      |      |      |      |      |
| Clinical signs (Infection, bleeding, discoloration)                                                                                                                                                                                                               | Loss > 15%                                   | 18               |      |      |      |      |      |      |      |      |      |      |      |
|                                                                                                                                                                                                                                                                   | Normal                                       | 0                | 3,7  | 3,7  | 3,7  | 3,7  |      | 3,7  |      | 3,7  |      | 3,7  |      |
|                                                                                                                                                                                                                                                                   | Minor irritation around surgical wound       | 1                |      |      |      |      |      |      |      |      |      |      |      |
|                                                                                                                                                                                                                                                                   | Moderate irritation/infected surgical wound  | 3                |      |      |      |      |      |      |      |      |      |      |      |
|                                                                                                                                                                                                                                                                   | Infected/open surgical wound                 | 4*               | 3,9  | 3,9  | 3,9  | 3,9  |      | 3,9  |      | 3,9  |      | 3,9  |      |
|                                                                                                                                                                                                                                                                   | Tumour > 1,0 cm in diameter                  | 10               |      |      |      |      |      |      |      |      |      |      |      |
|                                                                                                                                                                                                                                                                   | Tumour > 1,5 cm in diameter                  | 18               |      |      |      |      |      |      |      |      |      |      |      |
|                                                                                                                                                                                                                                                                   | Ulcerous tumour                              | 18               |      |      |      |      |      |      |      |      |      |      |      |
| Total:                                                                                                                                                                                                                                                            |                                              |                  |      |      |      |      |      |      |      |      |      |      |      |
| Comments, treatments etc:                                                                                                                                                                                                                                         |                                              |                  |      |      |      |      |      |      |      |      |      |      |      |
| 0-3: Normal<br>4-9: Pay attention to health state and consider treatment<br>10-13: Pay close attention to health state, consider treatment or euthanasia<br>14-18: Euthanasia *Start treatment with antibiotics. If no effect within 3 days, euthanize the animal |                                              |                  |      |      |      |      |      |      |      |      |      |      |      |

NTNU

Score sheet FOTS:  
Avdeling for komparativ medisin (AKM)

Responsible researcher:  
Pettersen

Animal ID:  
(24)

Wipp  
(2)

| Parameter                                                                                                                                                                                                                                                         | State                                        | Assessment scale | Date | Date | Date | Date | Date | Date | Date | Date | Date | Date | Date |
|-------------------------------------------------------------------------------------------------------------------------------------------------------------------------------------------------------------------------------------------------------------------|----------------------------------------------|------------------|------|------|------|------|------|------|------|------|------|------|------|
| General appearance                                                                                                                                                                                                                                                | Normal                                       | 0                | 1/3  | 16/3 | 20/3 | 23/3 | 27/3 | 27/3 | 31/4 | 6/4  | 10/4 | 14/4 |      |
|                                                                                                                                                                                                                                                                   | Reduced grooming                             | 1                |      |      |      |      |      |      |      |      |      |      |      |
|                                                                                                                                                                                                                                                                   | Minor distention of abdomen, rough hair coat | 3                |      |      |      |      |      |      |      |      |      |      |      |
|                                                                                                                                                                                                                                                                   | Hunchback or distended abdomen, inactive     | 18               |      |      |      |      |      |      |      |      |      |      |      |
| Behaviour (Level of activity)                                                                                                                                                                                                                                     | Normal                                       | 0                |      |      |      |      |      |      |      |      |      |      |      |
|                                                                                                                                                                                                                                                                   | Slightly reduced                             | 1                |      |      |      |      |      |      |      |      |      |      |      |
|                                                                                                                                                                                                                                                                   | Moderately reduced                           | 3                |      |      |      |      |      |      |      |      |      |      |      |
|                                                                                                                                                                                                                                                                   | Distressed behaviour due to growing tumour   | 3                |      |      |      |      |      |      |      |      |      |      |      |
|                                                                                                                                                                                                                                                                   | Obviously reduced                            | 5                |      |      |      |      |      |      |      |      |      |      |      |
|                                                                                                                                                                                                                                                                   | Isolated, inactive, lethargic                | 18               |      |      |      |      |      |      |      |      |      |      |      |
| Body weight (Compared to body weight before experiment)                                                                                                                                                                                                           | Body weight:                                 |                  | 22,6 | 21,7 | 22,2 | 22,7 | 22,7 | 23,1 | 22,6 | 22,5 | 23,5 | 22,5 |      |
|                                                                                                                                                                                                                                                                   | No loss                                      | 0                |      |      |      |      |      |      |      |      |      |      |      |
|                                                                                                                                                                                                                                                                   | Loss < 5%                                    | 1                |      |      |      |      |      |      |      |      |      |      |      |
|                                                                                                                                                                                                                                                                   | Loss 5-9%                                    | 3                |      |      |      |      |      |      |      |      |      |      |      |
|                                                                                                                                                                                                                                                                   | Loss 10-14%                                  | 5                |      |      |      |      |      |      |      |      |      |      |      |
| Clinical signs (Infection, bleeding, discoloration)                                                                                                                                                                                                               | Loss > 15%                                   | 18               |      |      |      |      |      |      |      |      |      |      |      |
|                                                                                                                                                                                                                                                                   | Normal                                       | 0                | 3,2  | 3,2  | 3,3  |      | 3,4  |      | 3,6  |      | 3,7  | 3,7  |      |
|                                                                                                                                                                                                                                                                   | Minor irritation around surgical wound       | 1                |      |      |      |      |      |      |      |      |      |      |      |
|                                                                                                                                                                                                                                                                   | Moderate irritation/infected surgical wound  | 3                |      |      |      |      |      |      |      |      |      |      |      |
|                                                                                                                                                                                                                                                                   | Infected/open surgical wound                 | 4*               | 3,2  | 3,4  | 3,5  |      | 3,6  |      | 3,5  |      | 3,9  | 3,9  |      |
|                                                                                                                                                                                                                                                                   | Tumour > 1,0 cm in diameter                  | 10               |      |      |      |      |      |      |      |      |      |      |      |
|                                                                                                                                                                                                                                                                   | Tumour > 1,5 cm in diameter                  | 18               |      |      |      |      |      |      |      |      |      |      |      |
|                                                                                                                                                                                                                                                                   | Ulcerous tumour                              | 18               |      |      |      |      |      |      |      |      |      |      |      |
| Total:                                                                                                                                                                                                                                                            |                                              |                  |      |      |      |      |      |      |      |      |      |      |      |
| Comments, treatments etc:                                                                                                                                                                                                                                         |                                              |                  |      |      |      |      |      |      |      |      |      |      |      |
| 0-3: Normal<br>4-9: Pay attention to health state and consider treatment<br>10-13: Pay close attention to health state, consider treatment or euthanasia<br>14-18: Euthanasia *Start treatment with antibiotics. If no effect within 3 days, euthanize the animal |                                              |                  |      |      |      |      |      |      |      |      |      |      |      |

NTNU

Score sheet FOTS:  
Avdeling for komparativ medisin (AKM)

Responsible researcher:  
Pettersen

Animal ID:  
(24)

Wipp  
(2)

| Parameter                                                                                                                                                                                                                                                         | State                                        | Assessment scale | Date | Date | Date | Date | Date | Date | Date | Date | Date | Date | Date |
|-------------------------------------------------------------------------------------------------------------------------------------------------------------------------------------------------------------------------------------------------------------------|----------------------------------------------|------------------|------|------|------|------|------|------|------|------|------|------|------|
| General appearance                                                                                                                                                                                                                                                | Normal                                       | 0                | 14/5 | 18/5 | 19/5 | 22/5 | 26/5 | 29/5 | 2/6  | 5/6  | 8/6  | 11/6 |      |
|                                                                                                                                                                                                                                                                   | Reduced grooming                             | 1                |      |      |      |      |      |      |      |      |      |      |      |
|                                                                                                                                                                                                                                                                   | Minor distention of abdomen, rough hair coat | 3                |      |      |      |      |      |      |      |      |      |      |      |
|                                                                                                                                                                                                                                                                   | Hunchback or distended abdomen, inactive     | 18               |      |      |      |      |      |      |      |      |      |      |      |
| Behaviour (Level of activity)                                                                                                                                                                                                                                     | Normal                                       | 0                |      |      |      |      |      |      |      |      |      |      |      |
|                                                                                                                                                                                                                                                                   | Slightly reduced                             | 1                |      |      |      |      |      |      |      |      |      |      |      |
|                                                                                                                                                                                                                                                                   | Moderately reduced                           | 3                | Fin  |      | Fin  |      |      |      | Fin  |      |      |      |      |
|                                                                                                                                                                                                                                                                   | Distressed behaviour due to growing tumour   | 3                | form |      | form |      |      |      | form |      |      |      |      |
|                                                                                                                                                                                                                                                                   | Obviously reduced                            | 5                |      |      |      |      |      |      |      |      |      |      |      |
|                                                                                                                                                                                                                                                                   | Isolated, inactive, lethargic                | 18               |      |      |      |      |      |      |      |      |      |      |      |
| Body weight (Compared to body weight before experiment)                                                                                                                                                                                                           | Body weight:                                 |                  | 23,0 | 22,1 | 21,3 | 21,9 | 22,3 | 22,0 | 23,0 | 22,0 | 21,4 |      |      |
|                                                                                                                                                                                                                                                                   | No loss                                      | 0                |      |      |      |      |      |      |      |      |      |      |      |
|                                                                                                                                                                                                                                                                   | Loss < 5%                                    | 1                |      |      |      |      |      |      |      |      |      |      |      |
|                                                                                                                                                                                                                                                                   | Loss 5-9%                                    | 3                |      |      |      |      |      |      |      |      |      |      |      |
|                                                                                                                                                                                                                                                                   | Loss 10-14%                                  | 5                |      |      |      |      |      |      |      |      |      |      |      |
| Clinical signs (Infection, bleeding, discoloration)                                                                                                                                                                                                               | Loss > 15%                                   | 18               |      |      |      |      |      |      |      |      |      |      |      |
|                                                                                                                                                                                                                                                                   | Normal                                       | 0                |      |      |      |      |      |      |      |      |      |      |      |
|                                                                                                                                                                                                                                                                   | Minor irritation around surgical wound       | 1                |      |      |      |      |      |      |      |      |      |      |      |
|                                                                                                                                                                                                                                                                   | Moderate irritation/infected surgical wound  | 3                |      |      |      |      |      |      |      |      |      |      |      |
|                                                                                                                                                                                                                                                                   | Infected/open surgical wound                 | 4*               | 3,9  |      | 3,9  |      |      |      | 3,9  |      | 3,9  |      | 3,9  |
|                                                                                                                                                                                                                                                                   | Tumour > 1,0 cm in diameter                  | 10               |      |      |      |      |      |      |      |      |      |      |      |
|                                                                                                                                                                                                                                                                   | Tumour > 1,5 cm in diameter                  | 18               |      |      |      |      |      |      |      |      |      |      |      |
|                                                                                                                                                                                                                                                                   | Ulcerous tumour                              | 18               |      |      |      |      |      |      |      |      |      |      |      |
| Total:                                                                                                                                                                                                                                                            |                                              |                  |      |      |      |      |      |      |      |      |      |      |      |
| Comments, treatments etc:                                                                                                                                                                                                                                         |                                              |                  |      |      |      |      |      |      |      |      |      |      |      |
| 0-3: Normal<br>4-9: Pay attention to health state and consider treatment<br>10-13: Pay close attention to health state, consider treatment or euthanasia<br>14-18: Euthanasia *Start treatment with antibiotics. If no effect within 3 days, euthanize the animal |                                              |                  |      |      |      |      |      |      |      |      |      |      |      |



Weight curve

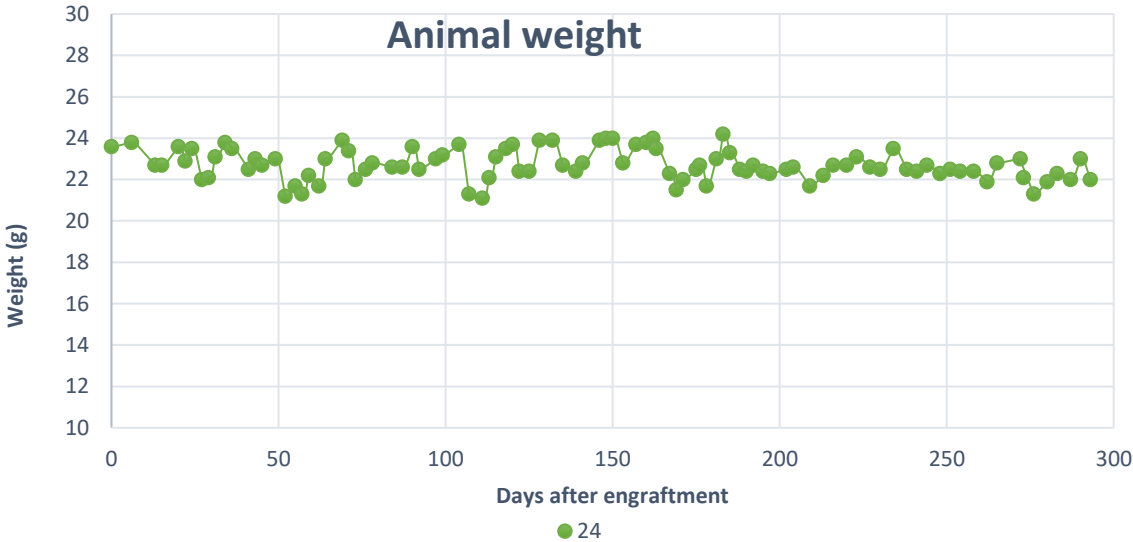

Xenograft growth curve

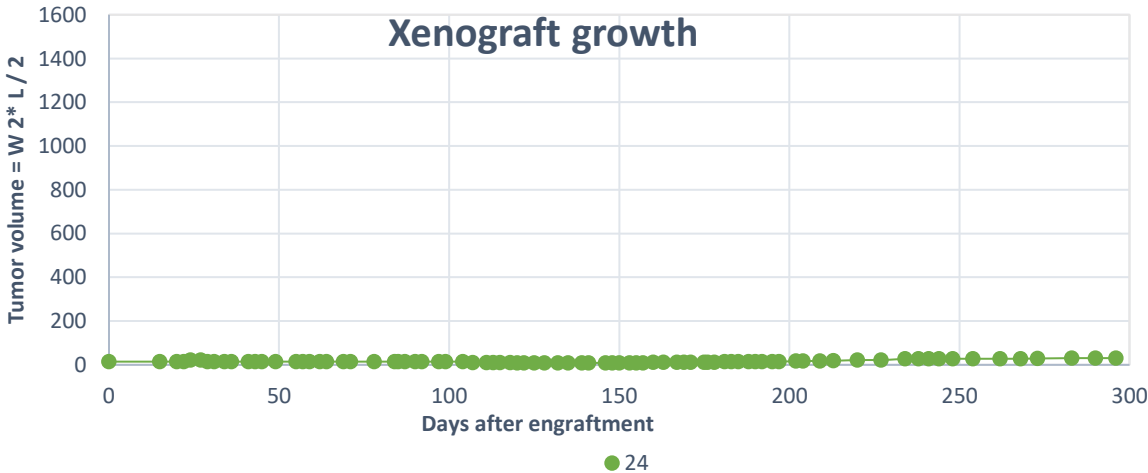

## Supplementary figure 1-24-6. Histology pictures

### M24X – Xenograft

- Typical colorectal adenocarcinoma
- Glandulas with necrotic debris in lumen
- Mucus producing adenocarcinoma
- Necrotic tissue in the middle

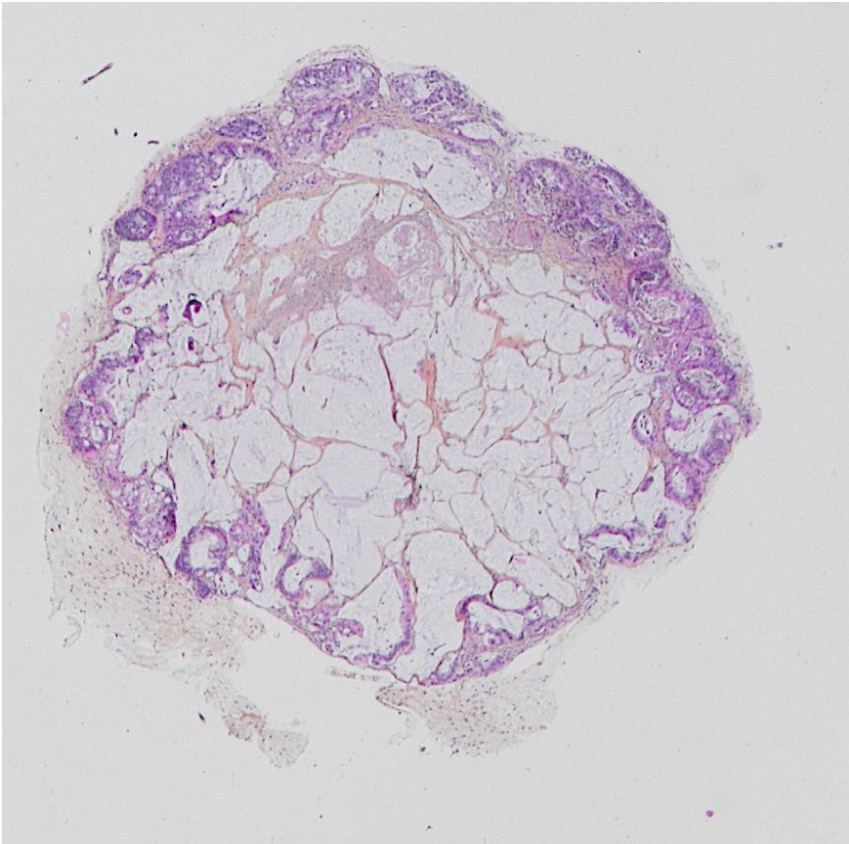

### M24LH – Lungs and heart

- Looks normal

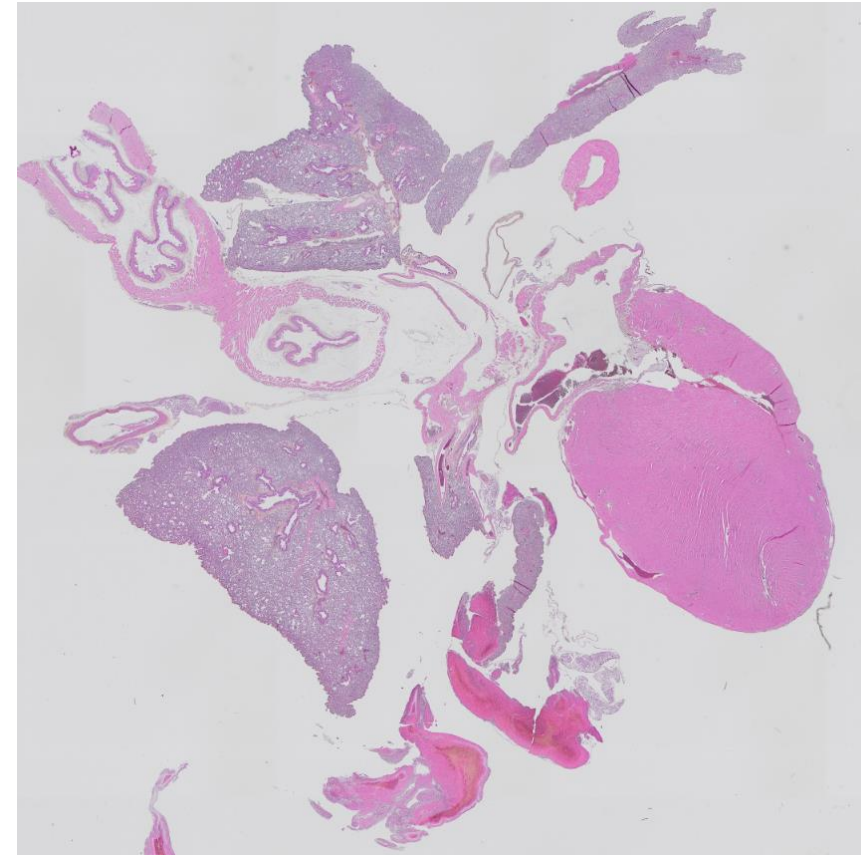



## Supplementary figure 1-24-6. Histology pictures

M24MP – Spleen and pancreas

- Spleen looks normal
- Pancreas looks normal

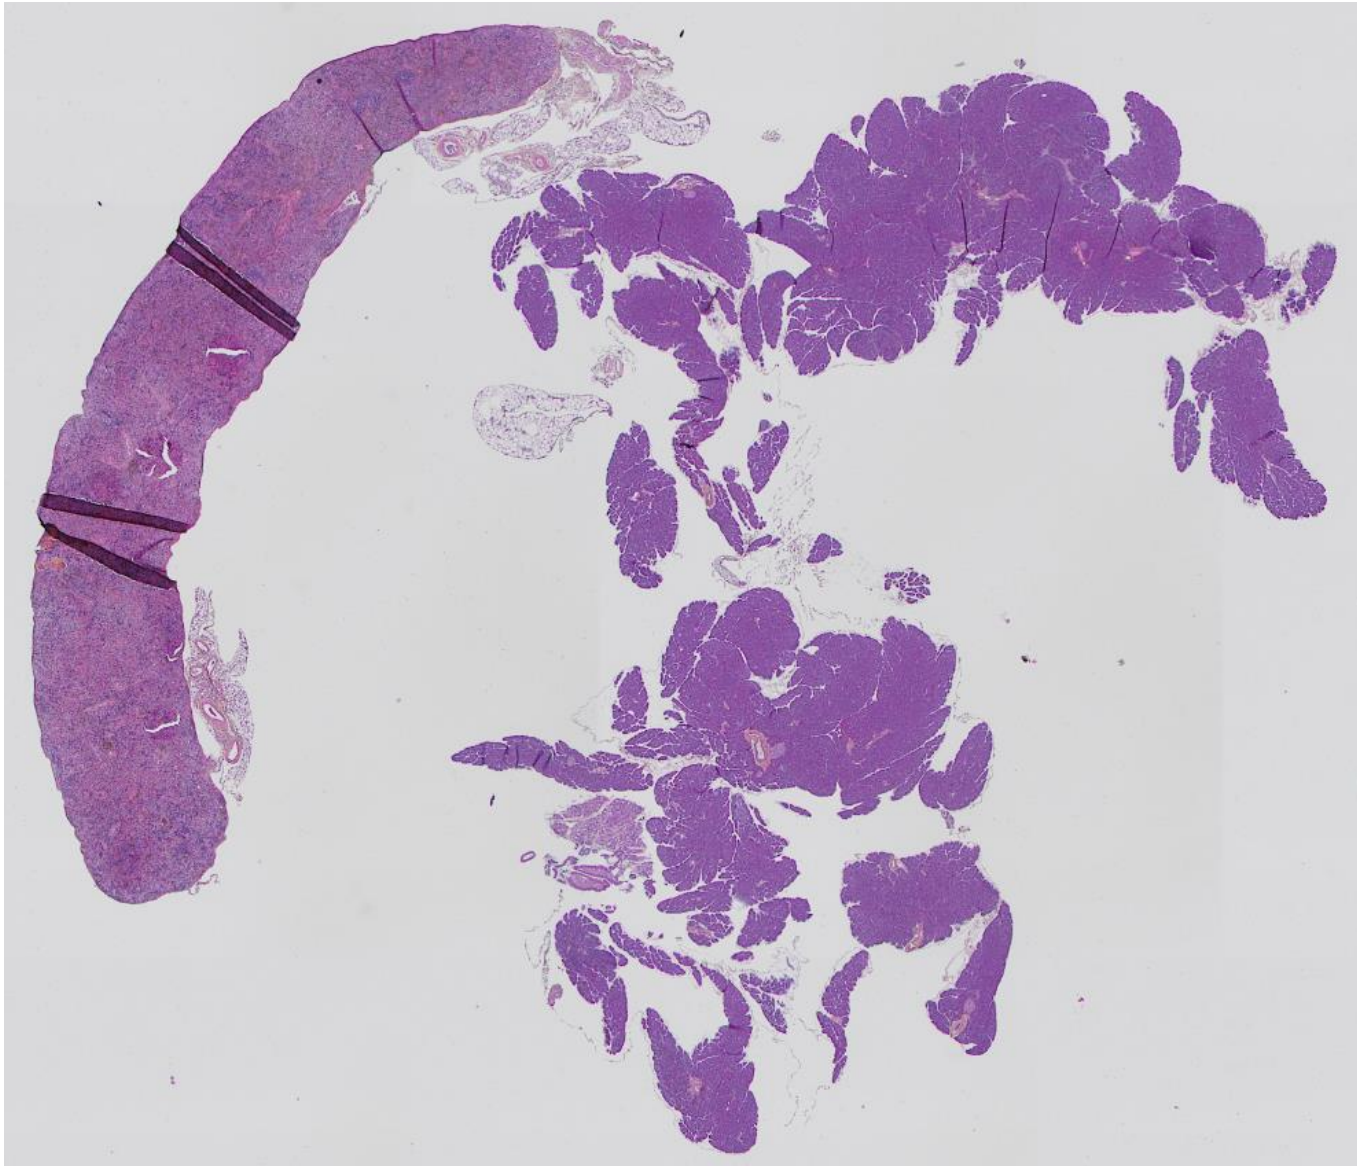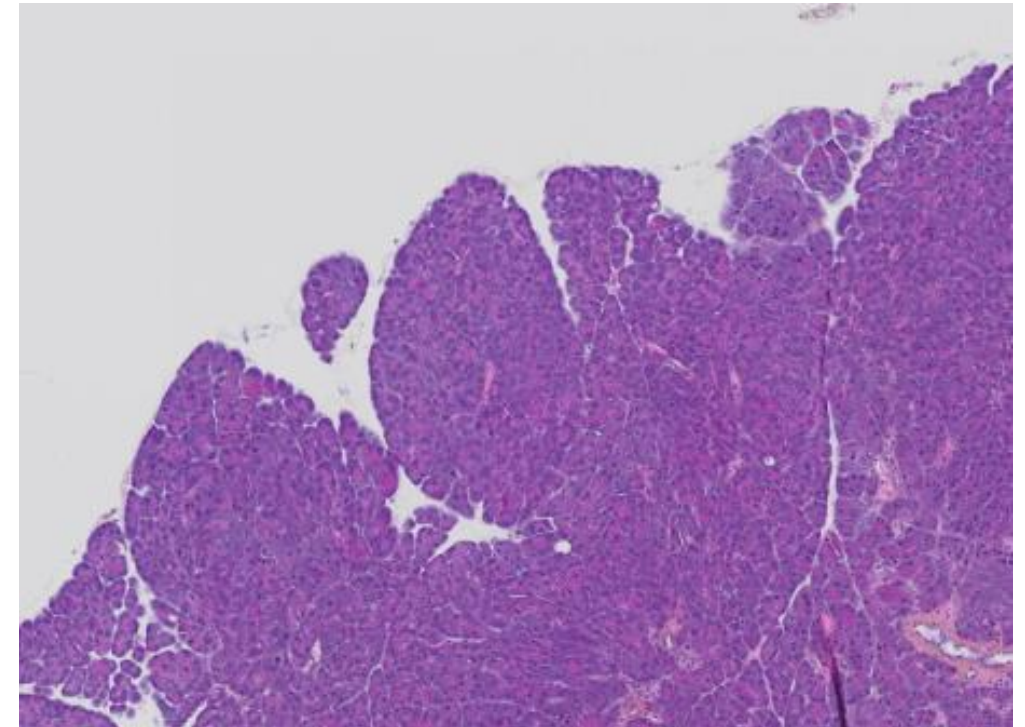

## Mouse 25

- Surgery date: 20.08.19
  - Age (weeks) 31
  - Weight (g) 24.6
  - Tumor fragment P17-2A
  - Fragment size 3 x 3 mm
  - Ear mark 3

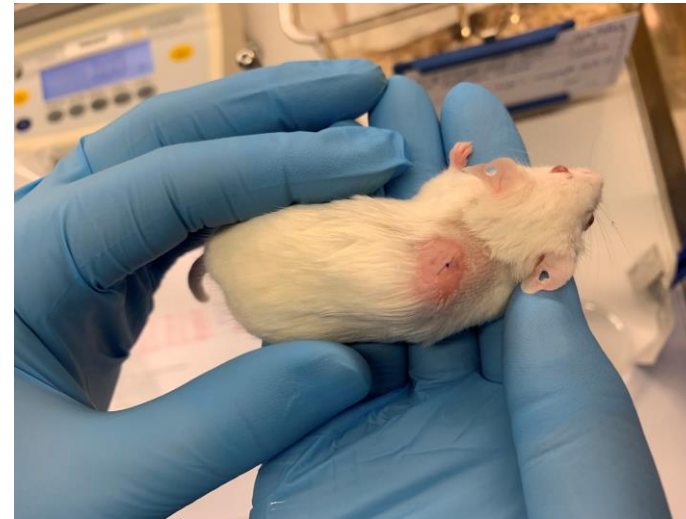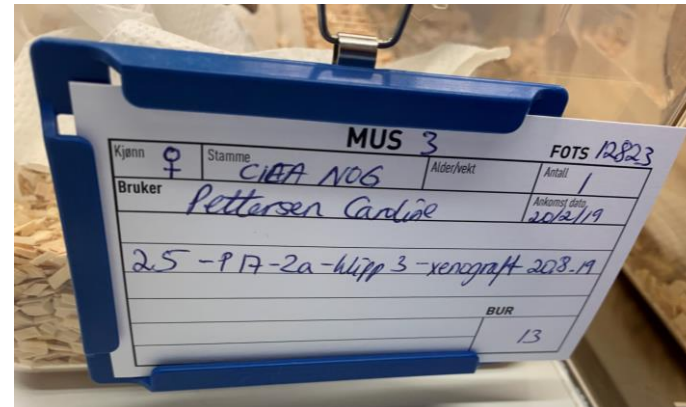

**Supplementary figure 1-25-1.**  
Pictures from the engraftment day



Supplementary figure 1-25-2. Pictures from follow up and xenograft size measurement

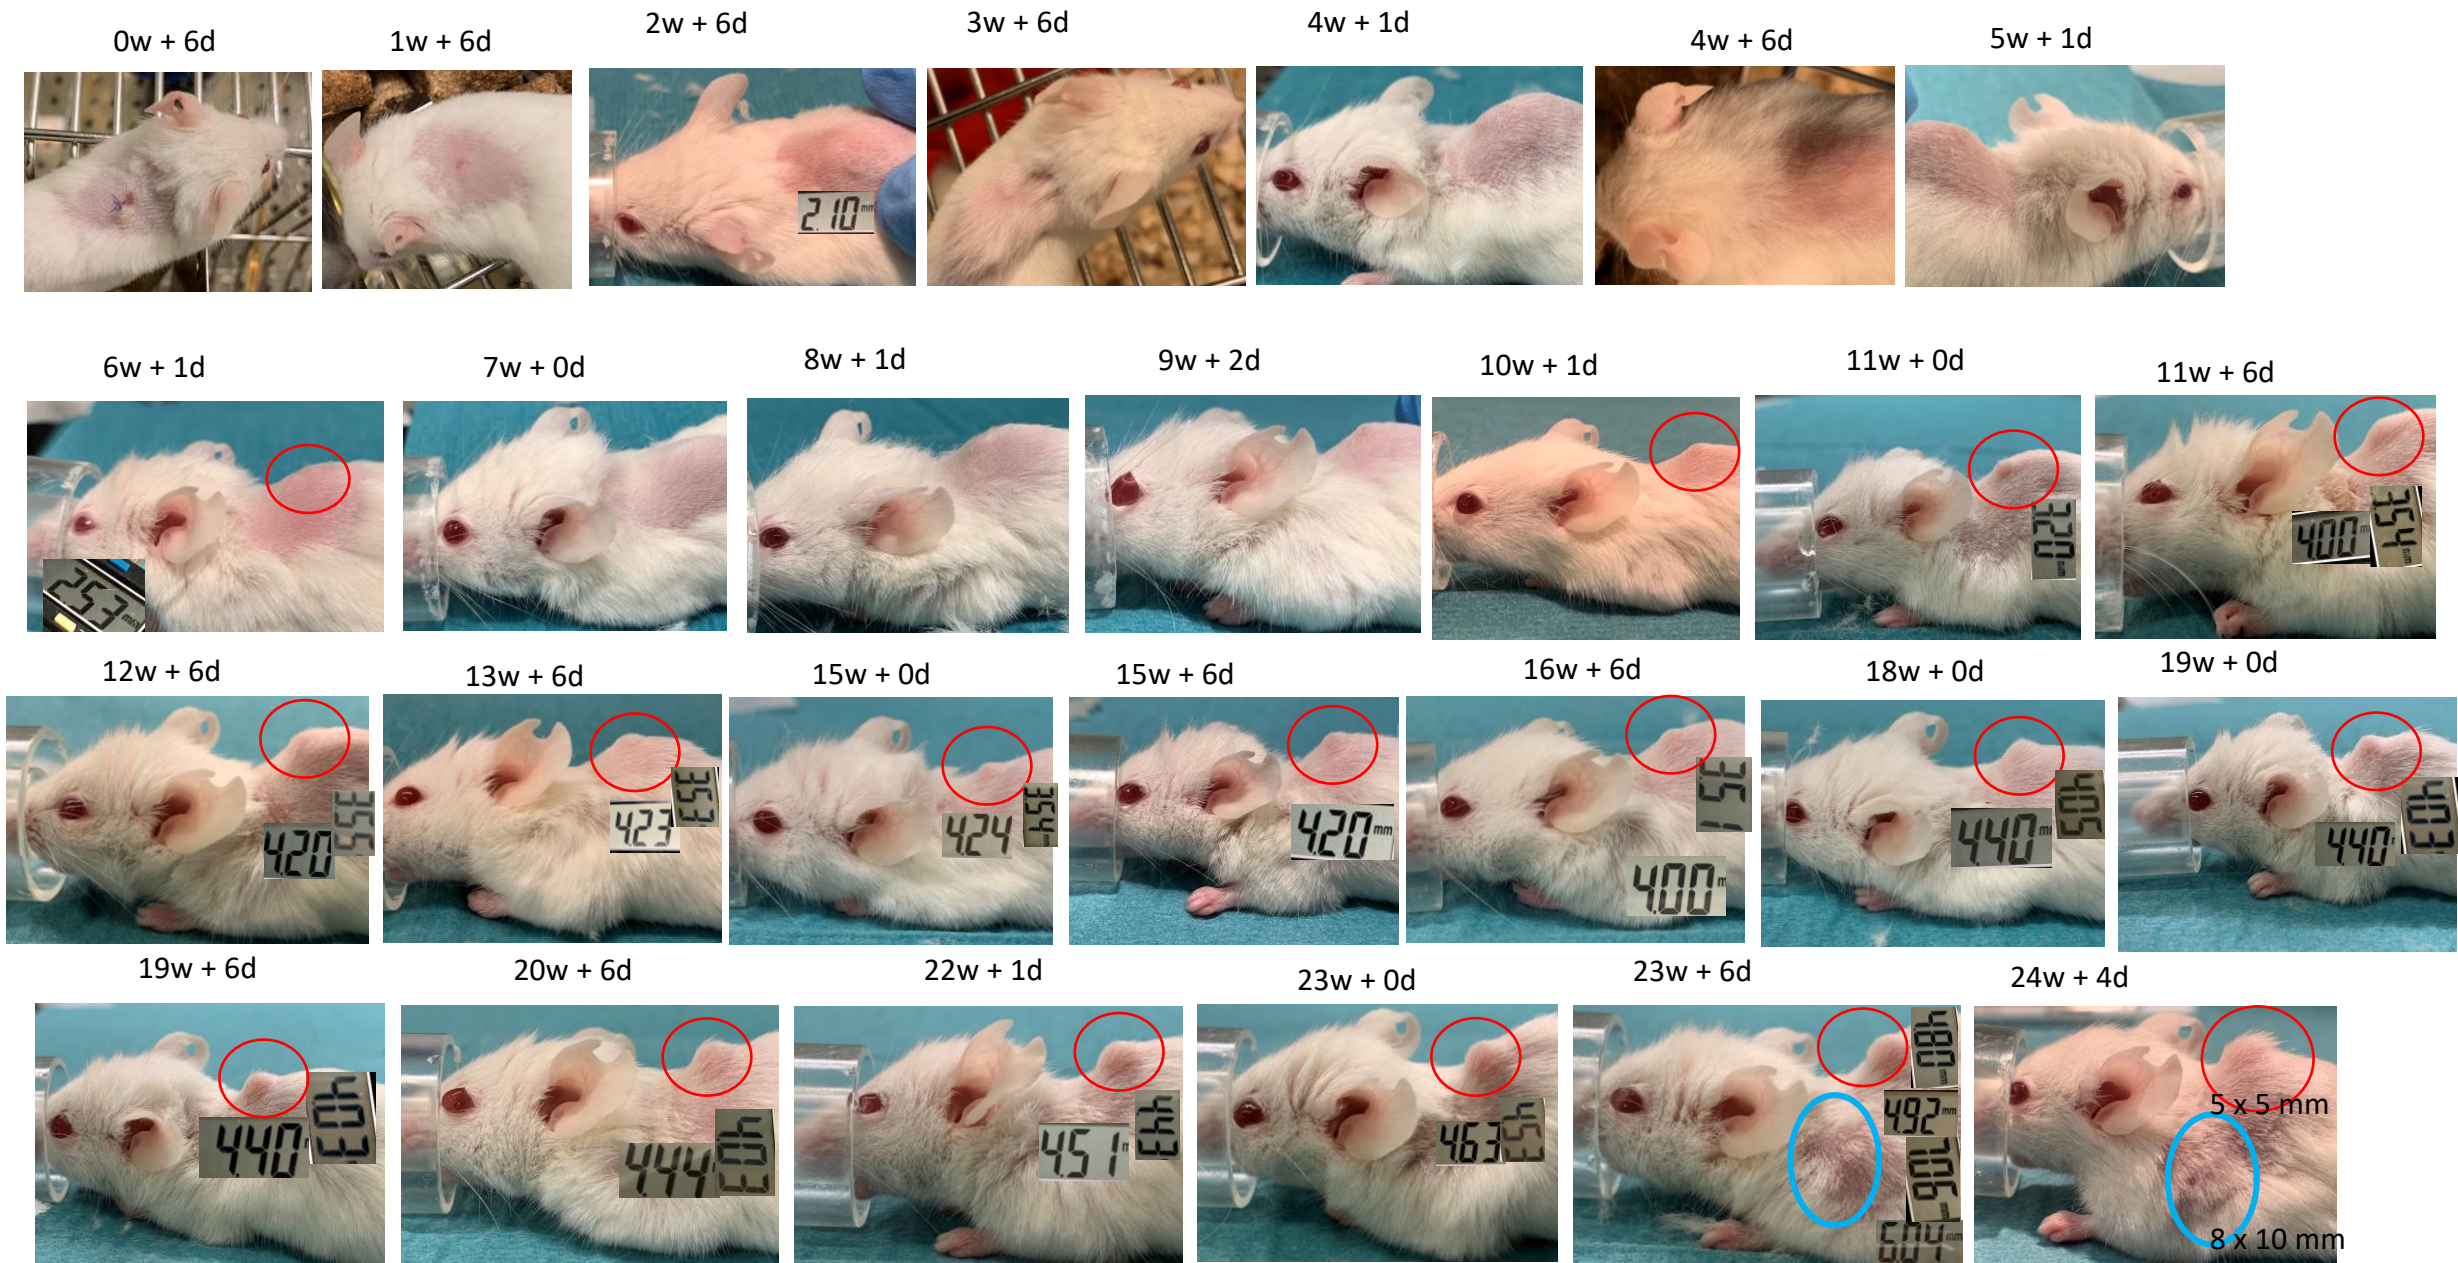

**Supplementary figure 1-25-3.** Picture from follow up

- Thick skin and a wound on the right shoulder at day 82, 11w + 5d (12.11.19)
- Looked better 15.11.19
- Shaving machine checked for any defaults

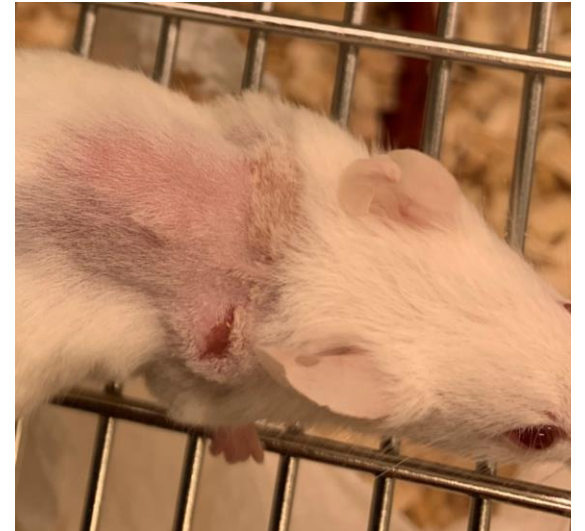



**Supplementary figure 1-25-3. Pictures from euthanization 10.02.20**

- Reduced general health
- Rapidly growing secondary tumor on the left shoulder
- Necroscopy
  - Xenograft size; 5 x 5 mm
  - Treatment not started due to reduced health
  - Secondary tumor at left shoulder 10 x 8 mm
  - Colon taken out and washed with sterile NaCl
    - To be used for testing antibodies for IHC
  - Blood sample
  - Tumor tissue for
    - Histology

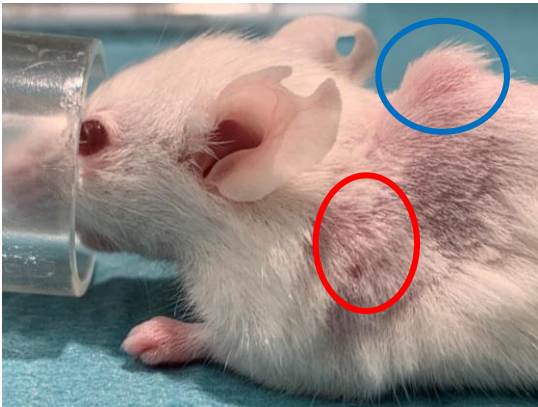

Blue; xenograft  
Red; secondary tumor

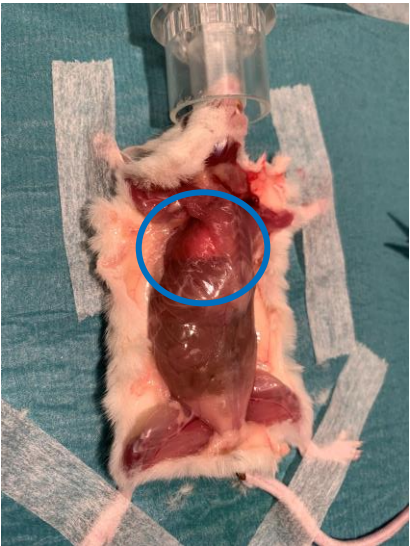

Whiteish colour on the lungs

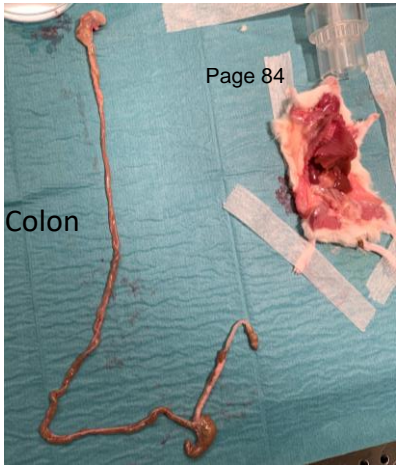

Colon taken out to use for antibody testing for IHC. Flushed with sterile NaCl.

| MUS 1                                                         |                            |             |    |
|---------------------------------------------------------------|----------------------------|-------------|----|
| Stamme                                                        | CIEA NOG                   | Alider/vekt | As |
| trucker                                                       | Petterson Caroline         |             |    |
| #3 har fått ekstra luf pi vensire skulder Tumor left shoulder |                            |             |    |
| 23                                                            | - P17-1a-Klipp 1-xenograft |             |    |
| 24                                                            | - P17-1b-Klipp 2 -11-      | BU          |    |
| 25                                                            | - P17-2a-Klipp 3 -11-      |             |    |
| 26                                                            | - P17-2b-Klipp 4 -11-      |             |    |

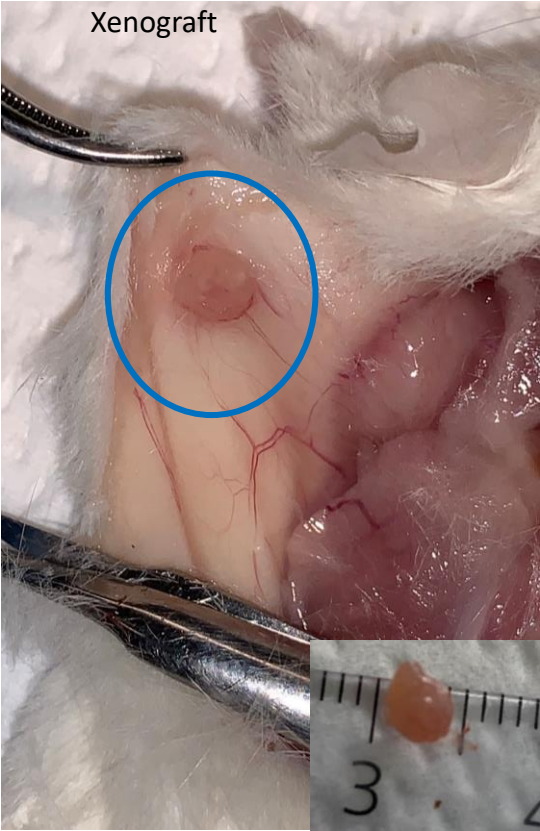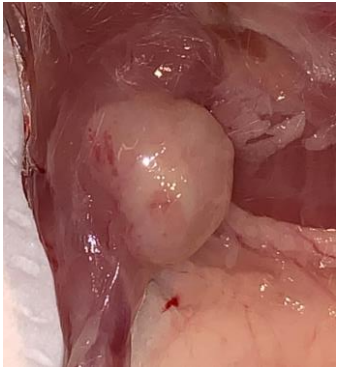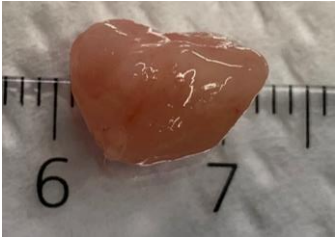

Tumor left shoulder

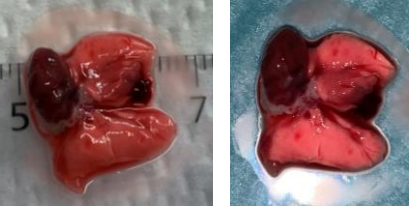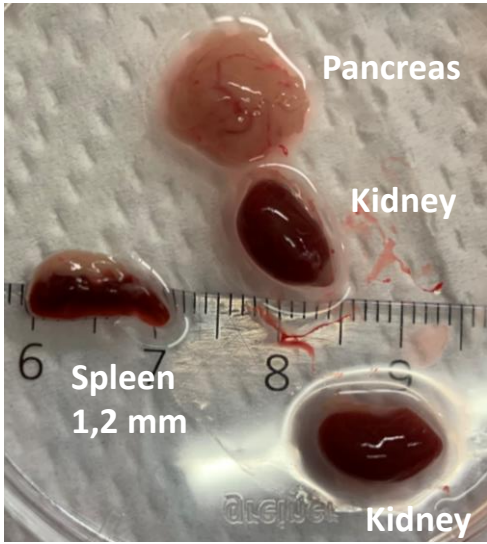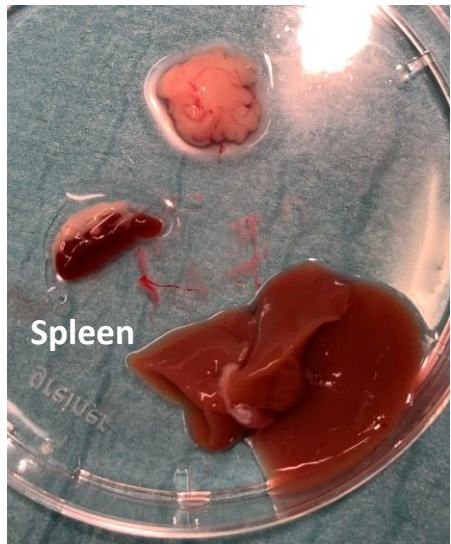



## Page 85

| <div> <div>NTNU</div> <div>Score sheet FOTS:</div> </div> <div> <div>Adveling for komparativt medisn (AKM)</div> <div>Petterson</div> </div> <div> <div>Responsible researcher:</div> <div>(P17-2a)</div> </div> <div> <div>Animal ID:</div> <div>(25)</div> </div> |                                              |                  |       |       |       |       |       |       |       |      |      |       |      |
|---------------------------------------------------------------------------------------------------------------------------------------------------------------------------------------------------------------------------------------------------------------------|----------------------------------------------|------------------|-------|-------|-------|-------|-------|-------|-------|------|------|-------|------|
| Parameter                                                                                                                                                                                                                                                           | State                                        | Assessment scale | Date  | Date  | Date  | Date  | Date  | Date  | Date  | Date | Date | Date  | Date |
| General appearance                                                                                                                                                                                                                                                  | Normal                                       | 0                | 14/10 | 18/10 | 21/10 | 23/10 | 26/10 | 29/10 | 31/11 | 3/11 | 6/11 | 12/11 | 13/3 |
|                                                                                                                                                                                                                                                                     | Reduced grooming                             | 1                |       |       |       |       |       |       |       |      |      |       |      |
|                                                                                                                                                                                                                                                                     | Minor distention of abdomen, rough hair coat | 3                |       |       |       |       |       |       |       |      |      |       |      |
|                                                                                                                                                                                                                                                                     | Hunched back or distended abdomen, inactive  | 18               |       |       |       |       |       |       |       |      |      |       |      |
| Behaviour (Level of activity)                                                                                                                                                                                                                                       | Normal                                       | 0                |       |       |       |       |       |       |       |      |      |       |      |
|                                                                                                                                                                                                                                                                     | Slightly reduced                             | 1                |       |       |       |       |       |       |       |      |      |       |      |
|                                                                                                                                                                                                                                                                     | Moderately reduced                           | 3                |       |       |       |       |       |       |       |      |      |       |      |
|                                                                                                                                                                                                                                                                     | Distressed behaviour due to growing tumour   | 3                |       |       |       |       |       |       |       |      |      |       |      |
|                                                                                                                                                                                                                                                                     | Obviously reduced                            | 5                |       |       |       |       |       |       |       |      |      |       |      |
|                                                                                                                                                                                                                                                                     | Isolated, inactive, lethargic                | 18               |       |       |       |       |       |       |       |      |      |       |      |
| Body weight (Compared to body weight before experiment)                                                                                                                                                                                                             | Body weight:                                 |                  | 23.0  | 23.4  | 25.4  | 23.8  | 24.6  | 28.7  | 23.0  | 24.1 | 25.1 | 23.8  |      |
|                                                                                                                                                                                                                                                                     | No loss                                      | 0                |       |       |       |       |       |       |       |      |      |       |      |
|                                                                                                                                                                                                                                                                     | Loss < 5 %                                   | 1                |       |       |       |       |       |       |       |      |      |       |      |
|                                                                                                                                                                                                                                                                     | Loss 5-9 %                                   | 3                |       |       |       |       |       |       |       |      |      |       |      |
|                                                                                                                                                                                                                                                                     | Loss 10-14 %                                 | 5                |       |       |       |       |       |       |       |      |      |       |      |
|                                                                                                                                                                                                                                                                     | Loss > 15 %                                  | 18               |       |       |       |       |       |       |       |      |      |       |      |
| Clinical signs (Infection, bleeding, discoloration)                                                                                                                                                                                                                 | Normal                                       | 0                | 2.5   | 2.5   | -11   | 3     | -11   | 3     | -11   | 3.2  | 3.2  | 3.5   | 3.5  |
|                                                                                                                                                                                                                                                                     | Minor irritation around surgical wound       | 1                |       |       |       |       |       |       |       |      |      |       |      |
|                                                                                                                                                                                                                                                                     | Moderate irritation/infected surgical wound  | 3                |       |       |       |       |       |       |       |      |      |       |      |
|                                                                                                                                                                                                                                                                     | Infected/open surgical wound                 | 4+               |       |       |       |       |       |       |       |      |      |       |      |
|                                                                                                                                                                                                                                                                     | Tumour > 1.0 cm in diameter                  | 10               |       |       |       |       |       |       |       |      |      |       |      |
|                                                                                                                                                                                                                                                                     | Tumour > 1.5 cm in diameter                  | 18               |       |       |       |       |       |       |       |      |      |       |      |
|                                                                                                                                                                                                                                                                     | Ulcerous tumour                              | 18               |       |       |       |       |       |       |       |      |      |       |      |
|                                                                                                                                                                                                                                                                     |                                              |                  |       |       |       |       |       |       |       |      |      |       |      |
| Total:                                                                                                                                                                                                                                                              |                                              |                  |       |       |       |       |       |       |       |      |      |       |      |
| Comments, treatments etc:                                                                                                                                                                                                                                           |                                              |                  |       |       |       |       |       |       |       |      |      |       |      |

0-3: Normal  
 4-9: Pay attention to health state and consider treatment  
 10-13: Pay close attention to health state, consider treatment or euthanasia  
 14-18: Euthanasia \*Start treatment with antibiotics. If no effect within 3 days, euthanize the animal

| <div>  <b>NTNU</b> Score sheet FOTS: <b>Avdeling for komparativ medisin (AKM)</b> </div> |                                              | <div> <b>Responsible researchers:</b><br/> <b>Petersen</b> </div> |      | <div> <b>Animal ID:</b> <b>23</b> </div> |      | <div> <b>Weight</b> </div> |      |      |      |      |      |      |
|-----------------------------------------------------------------------------------------------------------------------------------------------------------------------------|----------------------------------------------|-------------------------------------------------------------------|------|------------------------------------------|------|----------------------------|------|------|------|------|------|------|
| Parameter                                                                                                                                                                   | State                                        | Assessment scale                                                  | Date | Date                                     | Date | Date                       | Date | Date | Date | Date | Date | Date |
| <b>General appearance</b>                                                                                                                                                   | Normal                                       | 0                                                                 | 20/1 | 22/1                                     | 24/1 | 27/1                       | 29/1 | 30/1 | 3/2  | 4/2  | 5/2  | 7/2  |
|                                                                                                                                                                             | Reduced grooming                             | 1                                                                 |      |                                          |      |                            |      |      |      |      |      |      |
|                                                                                                                                                                             | Minor distention of abdomen, rough hair coat | 3                                                                 |      |                                          |      |                            |      |      |      |      |      |      |
|                                                                                                                                                                             | Hunched or distended abdomen, inactive       | 18                                                                |      |                                          |      |                            |      |      |      |      |      |      |
| <b>Behaviour (Level of activity)</b>                                                                                                                                        | Normal                                       | 0                                                                 |      |                                          |      |                            |      |      |      |      |      |      |
|                                                                                                                                                                             | Slightly reduced                             | 1                                                                 |      |                                          |      |                            |      |      |      |      |      |      |
|                                                                                                                                                                             | Moderately reduced                           | 3                                                                 |      |                                          |      |                            |      |      |      |      |      |      |
|                                                                                                                                                                             | Distressed behaviour due to growing tumour   | 3                                                                 |      |                                          |      |                            |      |      |      |      |      |      |
|                                                                                                                                                                             | Obviously reduced                            | 5                                                                 |      |                                          |      |                            |      |      |      |      |      |      |
| <b>Body weight (Compared to body weight before experiment)</b>                                                                                                              | Isolated, inactive, lethargic                | 18                                                                |      |                                          |      |                            |      |      |      |      |      |      |
|                                                                                                                                                                             | Body weight                                  |                                                                   | 24.2 | 24.4                                     | 24.2 | 23.8                       | 22.8 | 23.5 | 23   | 24.4 | 24.5 |      |
|                                                                                                                                                                             | No loss                                      | 0                                                                 |      |                                          |      |                            |      |      |      |      |      |      |
|                                                                                                                                                                             | Loss < 5%                                    | 1                                                                 |      |                                          |      |                            |      |      |      |      |      |      |
|                                                                                                                                                                             | Loss 5-9%                                    | 3                                                                 |      |                                          |      |                            |      |      |      |      |      |      |
| <b>Clinical signs (Coughing, bleeding, discoloration)</b>                                                                                                                   | Loss 10-14%                                  | 5                                                                 |      |                                          |      |                            |      |      |      |      |      |      |
|                                                                                                                                                                             | Loss > 15%                                   | 18                                                                |      |                                          |      |                            |      |      |      |      |      |      |
|                                                                                                                                                                             | Normal                                       | 0                                                                 |      |                                          |      |                            |      |      |      |      |      |      |
|                                                                                                                                                                             | Minor irritation around surgical wound       | 1                                                                 | 9.4  | 9.4                                      | 4.5  | 4.5                        | 4.5  | 4.8  | 4.8  | 4.8  | 4.8  | 5    |
|                                                                                                                                                                             | Moderate irritation/infected surgical wound  | 3                                                                 | 4.4  | 4.5                                      | 4.5  | 4.6                        | 4.6  | 4.7  | 4.7  | 4.7  | 4.7  | 5.1  |
|                                                                                                                                                                             | Indefinite ripened surgical wound            | 4*                                                                |      |                                          |      |                            |      |      |      |      |      |      |
|                                                                                                                                                                             | Tumour > 1.0 cm in diameter                  | 10                                                                |      |                                          |      |                            |      |      |      |      |      |      |
|                                                                                                                                                                             | Tumour > 1.5 cm in diameter                  | 18                                                                |      |                                          |      |                            |      |      |      |      |      |      |
|                                                                                                                                                                             | Ulcerous tumour                              | 18                                                                |      |                                          |      |                            |      |      |      |      |      |      |
|                                                                                                                                                                             |                                              |                                                                   |      |                                          |      |                            |      |      |      |      |      |      |

**Comments, treatments etc:**

22-15g

3-5: Pay attention to health state and consider treatment

10-13: Pay close attention to health state, consider treatment or euthanasia

14-18: Euthanasia \*Start treatment with antibiotics. If no effect within 3 days, euthanize the animal

**Total:**

|  |  |  |  |  |  |  |  |  |  |  |  |  |
|--|--|--|--|--|--|--|--|--|--|--|--|--|
|  |  |  |  |  |  |  |  |  |  |  |  |  |
|--|--|--|--|--|--|--|--|--|--|--|--|--|

**Weight:**

5

5.1

10

10.1



**Supplementary figure 1-25-5.**  
Mouse, xenograft and  
secondary tumor growth  
curves

Weight curve

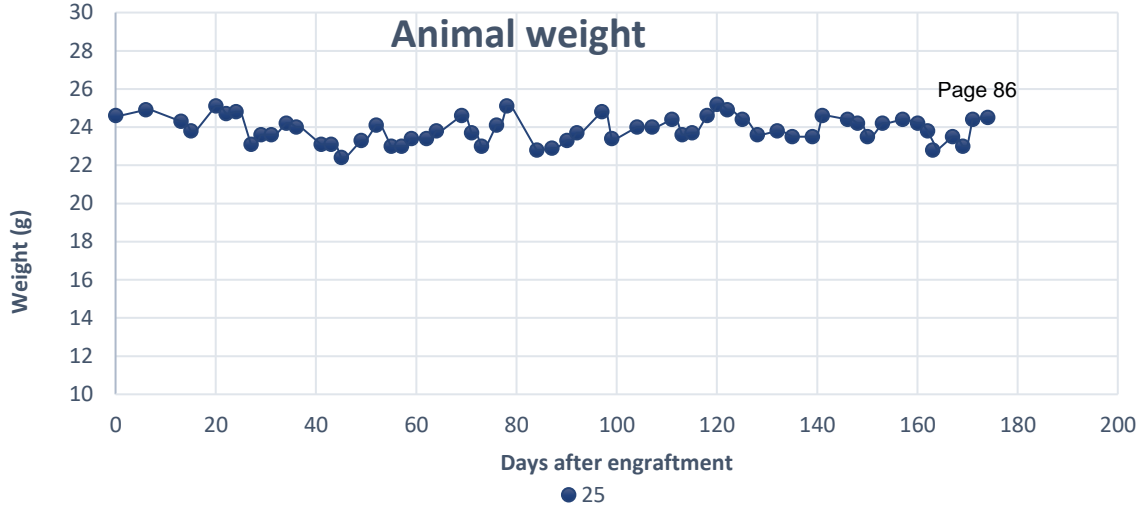

Xenograft growth curve

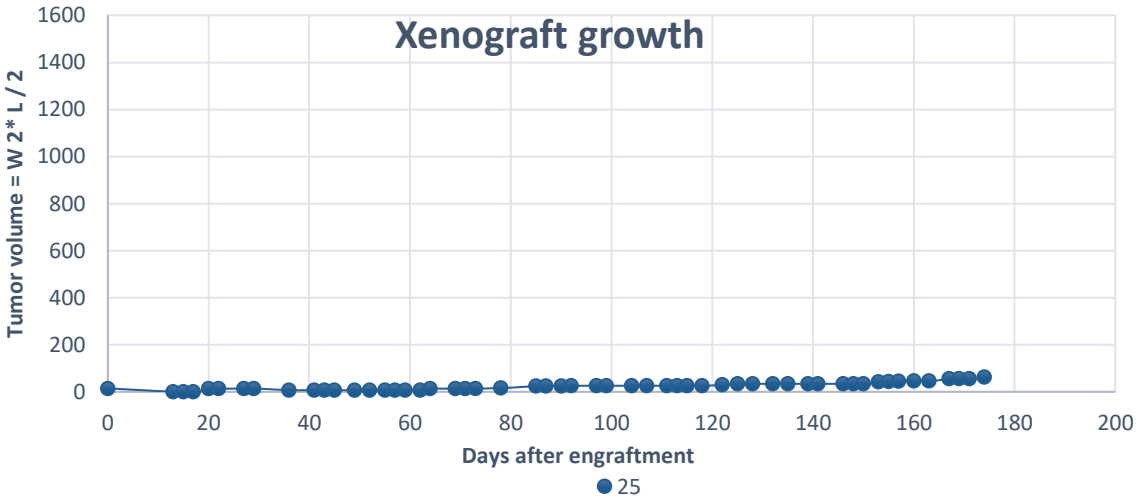

Secondary tumor growth curve

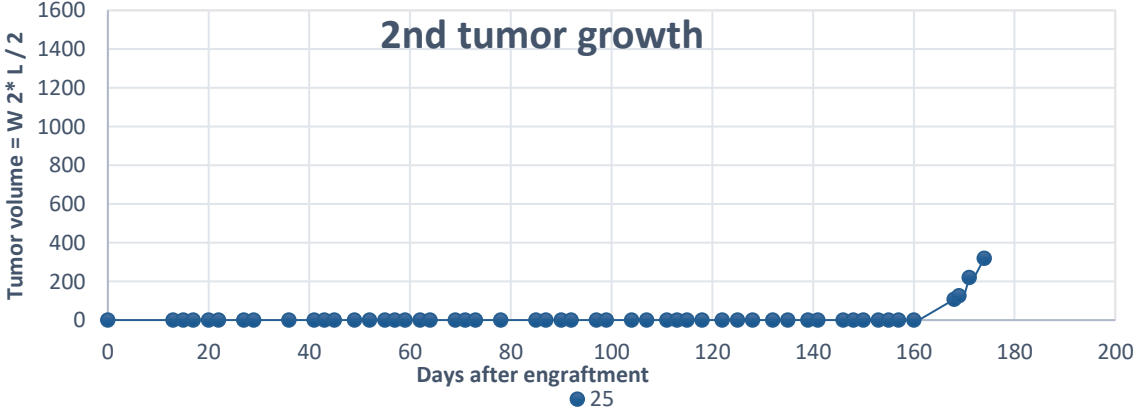

**M25X**

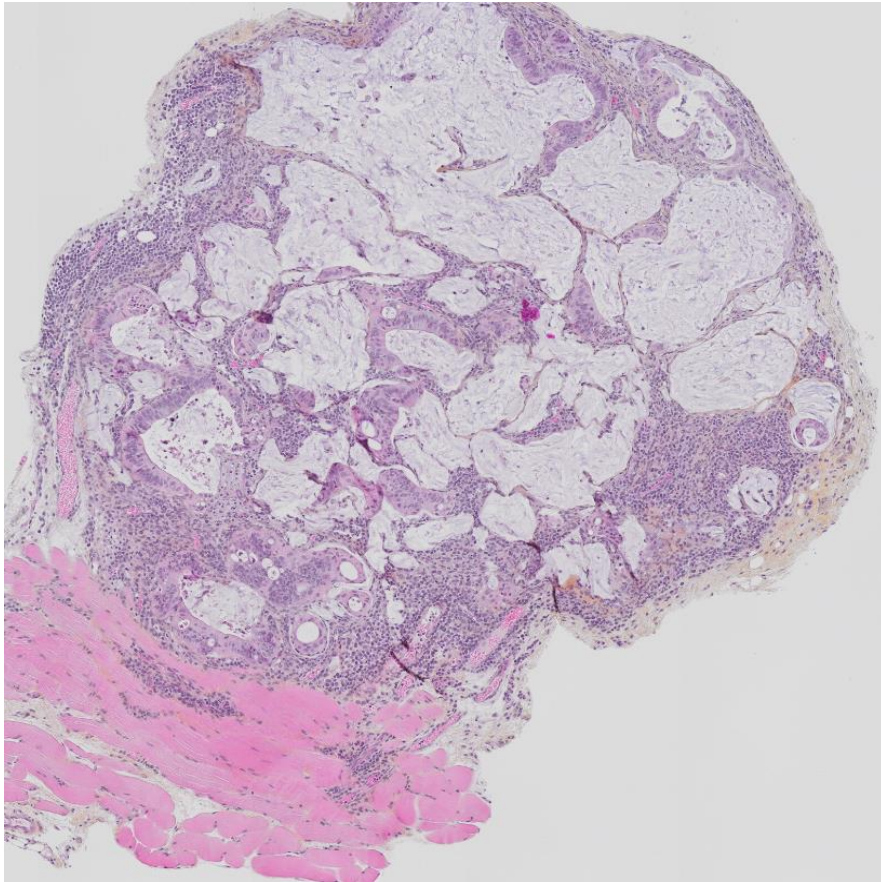

- Typical colorectal cancer tissue
- Areas with glandulas
- Lymphoid cells at the border of the xenograft
- Mucus producing adenocarcinoma
- Unregular nuclear membranes might indicate stressed cells
  - Could be that the lymphoid cells are about taking over the xenograft

**M25T**

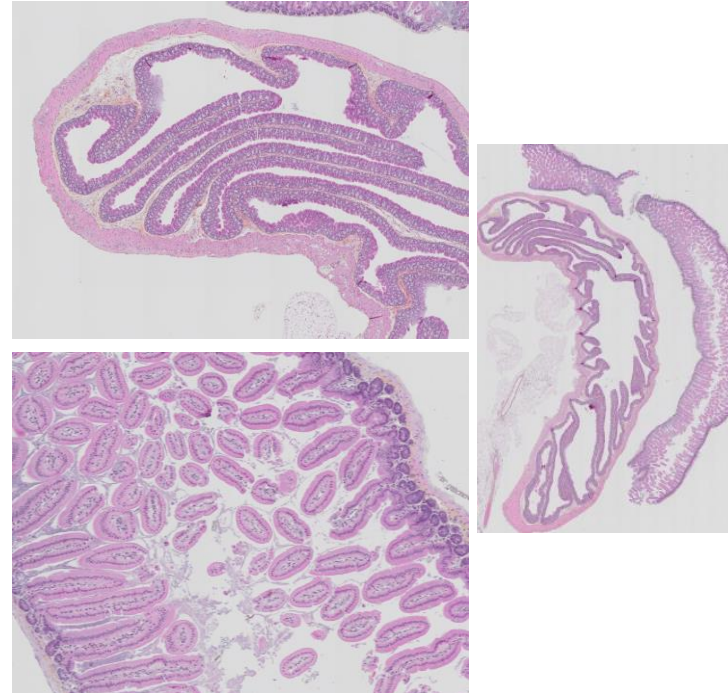

- Colon tissue; looks healthy
  - To be used for antibody testing

**M25P**

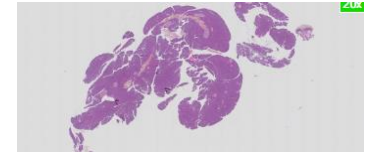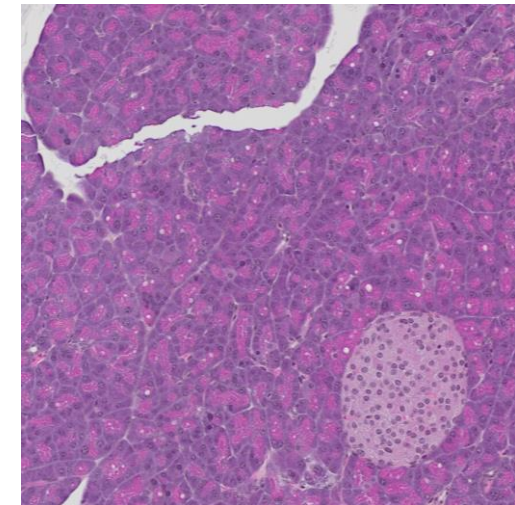

- Pancreas



**M25TV (tumor left shoulder)**

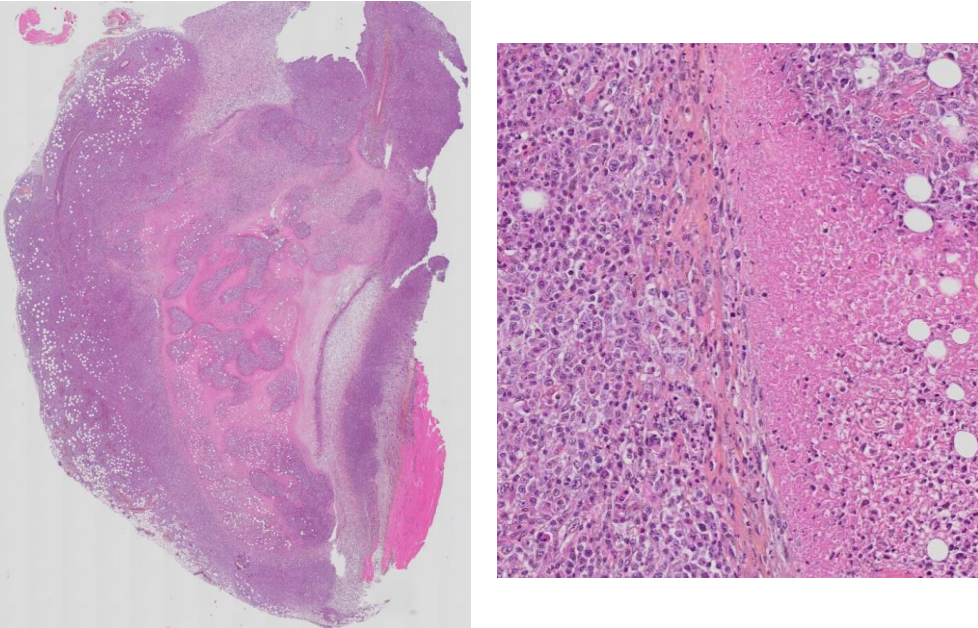

- Massive tumor
- Lymphoid cells
- Large light cells with spotted nuclei

**M25MP (spleen and pancreas)**

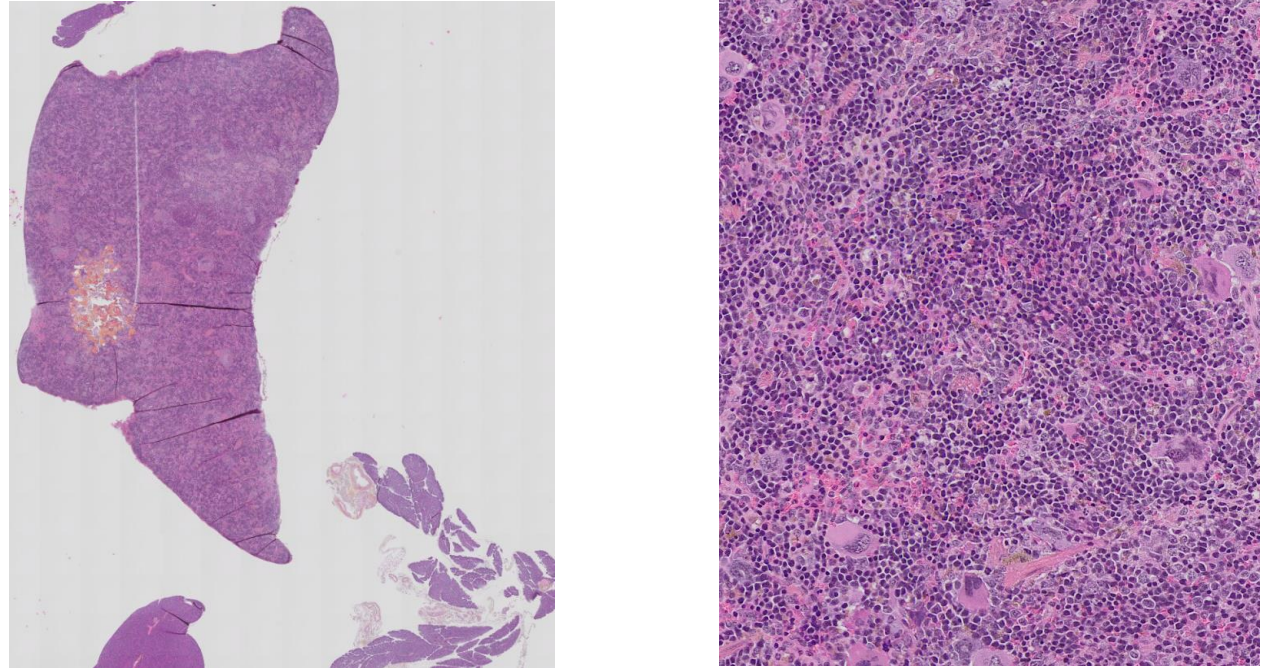

- Spleen with dark defined nuclei and megakaryocytes and red blodspots/vains
- Pancreas looks normal

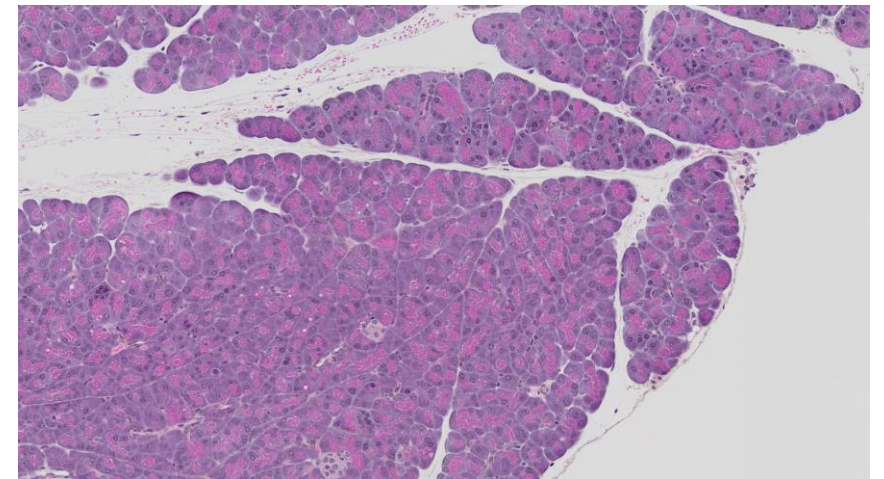

### M25LH (Lungs and heart)

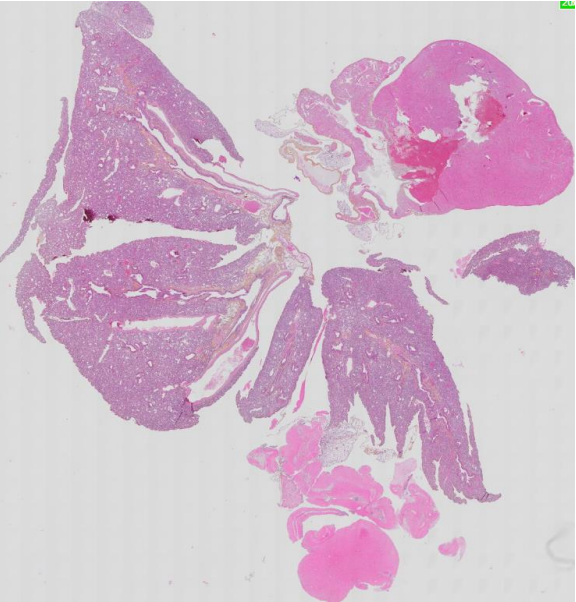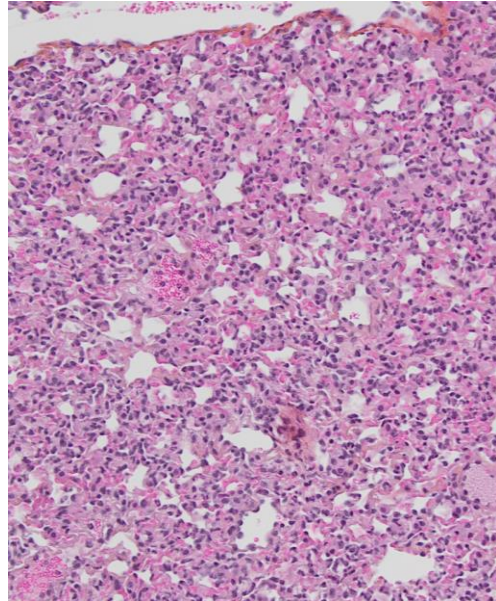

- Lungs look collapsed, might be from the preservation, fill lungs with formalin hereafter
- Lungs look healthy but cell dense



### M25TV (tumor left shoulder) - lymphoma

- IHC staining of Ki67, and CD45
- EBER-ISH staining to detect EBV

Mouse

HES

Ki67

CD45

EBER-ISH

#25

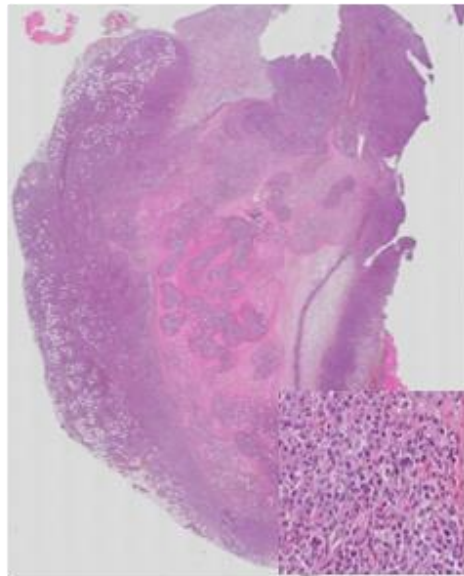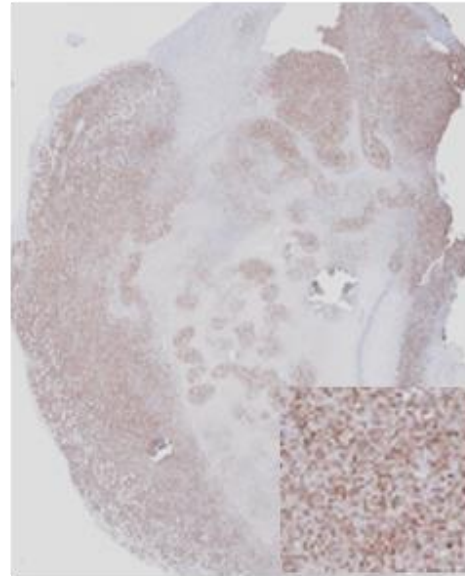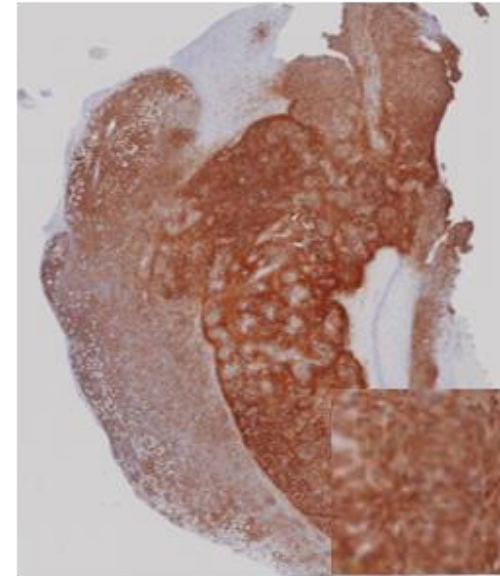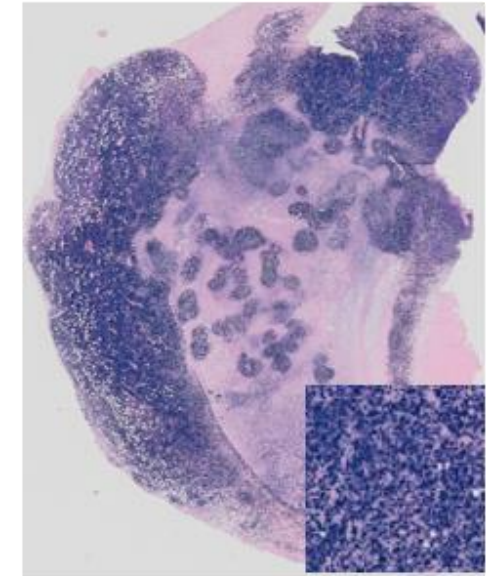

## Mouse 26

- Surgery date: 20.08.19
  - Age (weeks) 31
  - Weight (g) 24.4
  - Tumor fragment P17-2B
  - Fragment size 3 x 3 mm
  - Ear mark 4

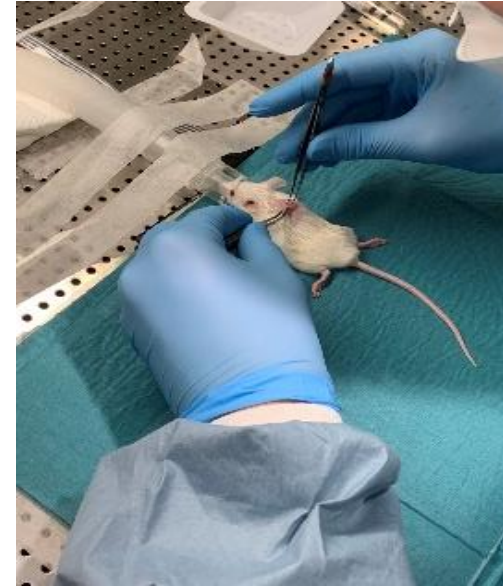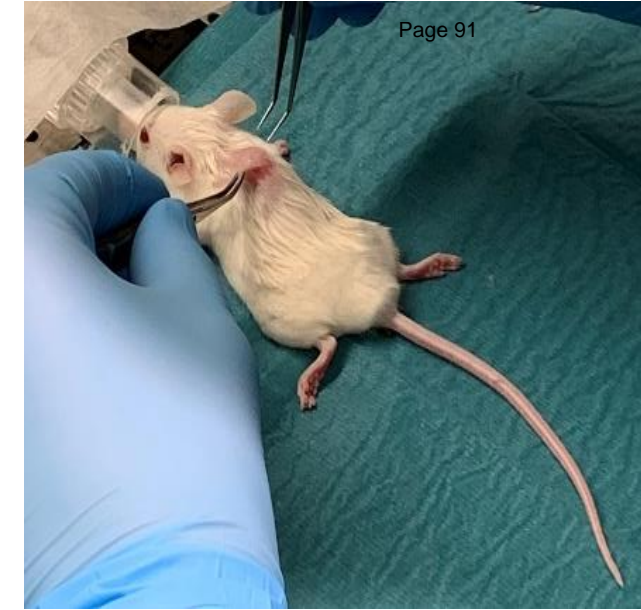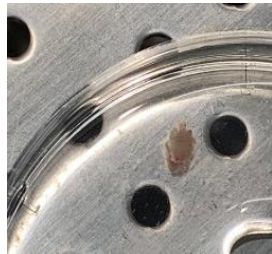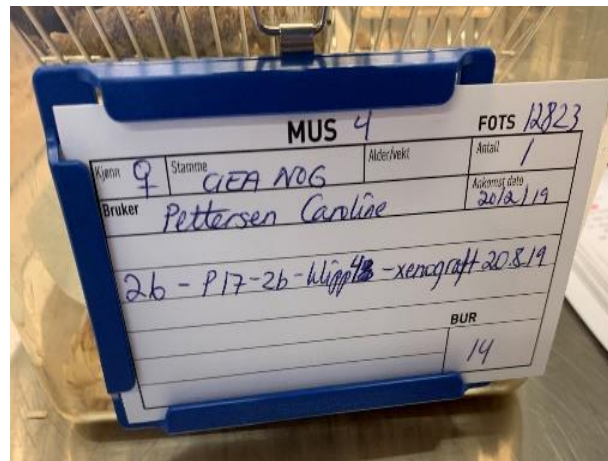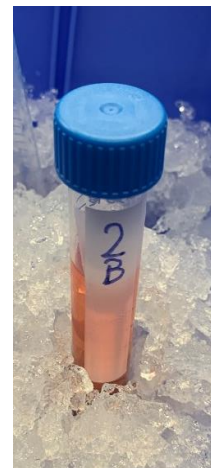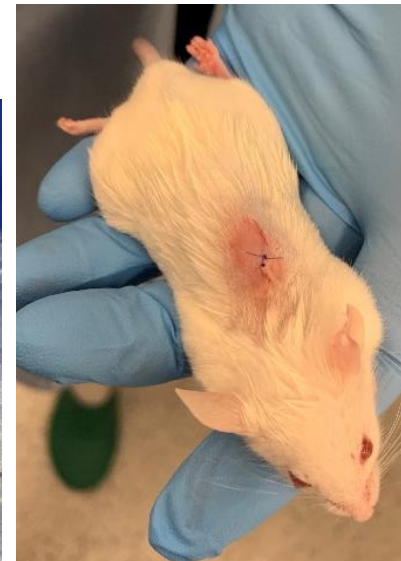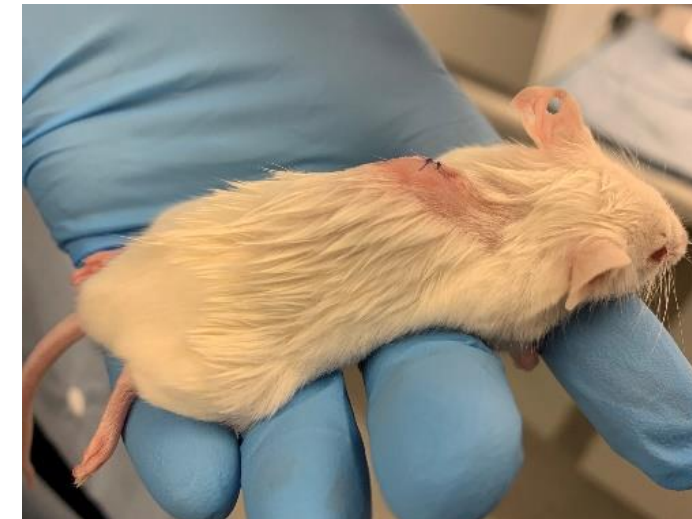

Supplementary figure 1-26-1. Pictures from the engraftment day



Supplementary figure 1-26-2. Pictures from follow up and tumor size measurement

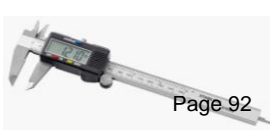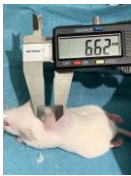

0w + 6d

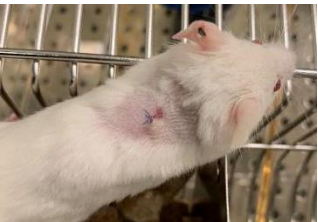

1w + 6d

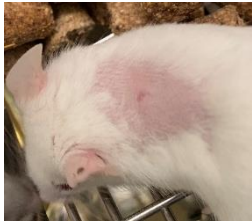

2w + 6d

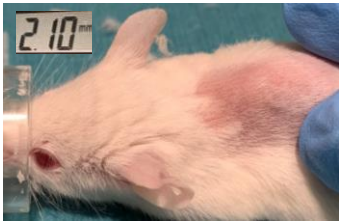

3w + 5d

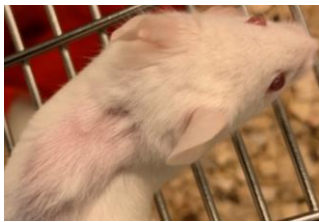

4w + 1d

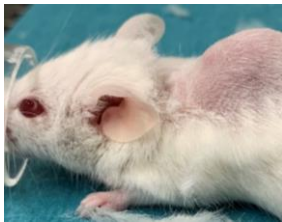

4w + 6d

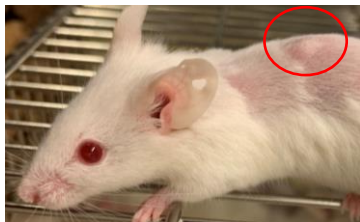

5w + 1d

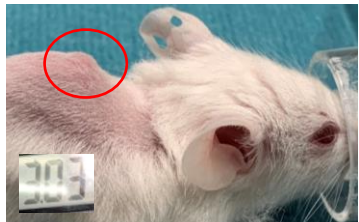

5w + 6d

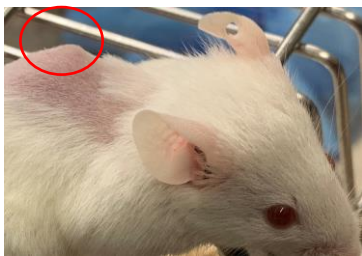

6w + 1d

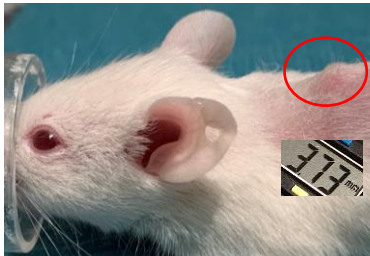

7w + 0d

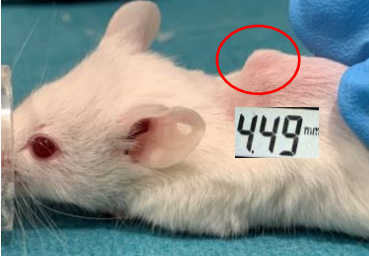

7w + 6d

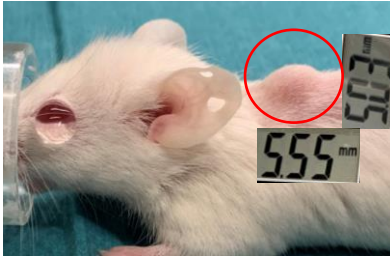

8w + 1d

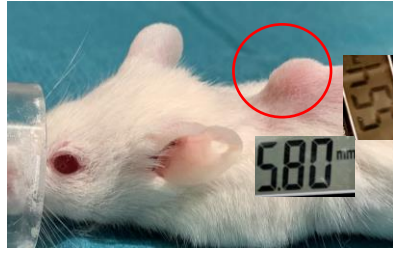

8w + 3d

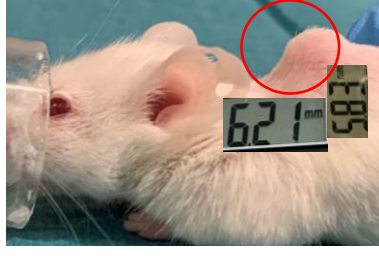

8w + 6d

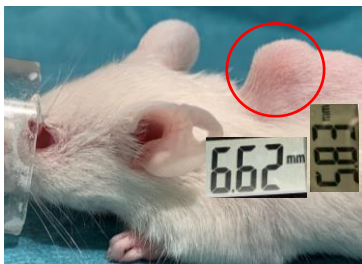

9w + 2d

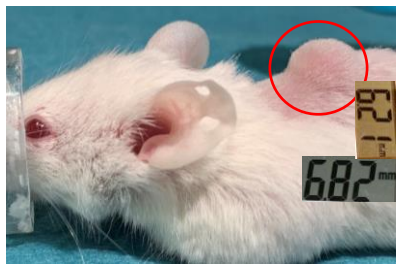

9w + 6d

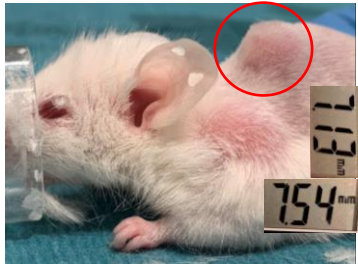

10w + 0d

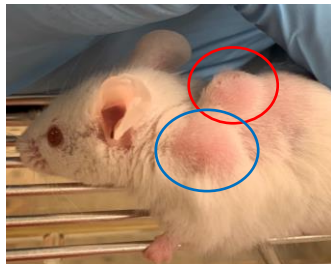

10w + 1d

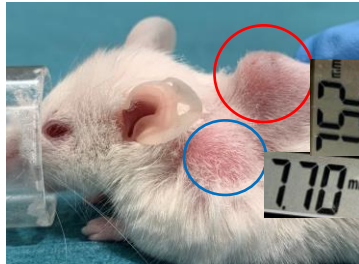

10w + 3d

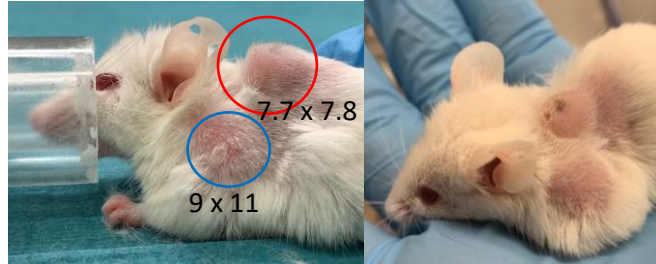

10w + 6d

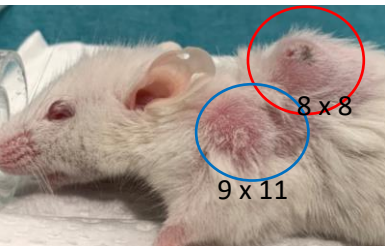

## Treatment:

- Smartfish Remune with fish oil
- Days/weeks
- Blood samples before/after treatment

~ OMEGA-3 ~

Antall gram per flaske før og etter 7 timer

|       |            | Weight (g)       |       | ID mus          | ID mus | ID mus |
|-------|------------|------------------|-------|-----------------|--------|--------|
|       |            | Start            | End   |                 |        |        |
|       |            | 08.00            | 15.00 |                 |        |        |
|       | 31.07.2019 | <del>142,5</del> |       | <del>26</del>   |        |        |
|       | 01.08.2019 |                  |       |                 |        |        |
|       | 02.08.2019 |                  |       |                 |        |        |
| 14.10 | 05.08.2019 | 142,5            | 129,6 | 26              |        |        |
| 15.10 | 06.08.2019 | 138,4            | 129   |                 |        |        |
| 16.10 | 07.08.2019 | 142,9            | 128,1 |                 |        |        |
| 17.10 | 08.08.2019 | 141,3            | 125,9 | (8 timer)       |        |        |
| 18.10 | 09.08.2019 | 140,9            | 137   |                 |        |        |
| 21.10 | 12.08.2019 | 142,2            | 133,6 | Har slått i 24t |        |        |
| 22.10 | 13.08.2019 |                  |       |                 |        |        |
| 23.10 | 14.08.2019 | 142,2            | 126,3 |                 |        |        |
| 24.10 | 15.08.2019 | 142,5            | 126,7 |                 |        |        |
|       | 16.08.2019 | 141,0            | 128,5 |                 |        |        |
| 28    | 19.08.2019 | 137,9            | 130,2 |                 |        |        |
| 29    | 20.08.2019 | 143,0            | 126,8 |                 |        |        |
| 30/10 | 21.08.2019 | 140,9            | 127,9 |                 |        |        |
| 31/10 | 22.08.2019 | 140,8            | 130,1 |                 |        |        |
| 1/11  | 23.08.2019 | 136,4            | 124,4 |                 |        |        |
| 4.11  | 26.08.2019 | 136,0            | 128,8 |                 |        |        |
| 5.11  | 27.08.2019 |                  |       |                 |        |        |

**Supplementary figure 1-26-3.** List over weight registrations of drinking bottle (with Smartfish Remune Peach) before and after treatment



**Supplementary figure 1-26-4.**  
Pictures from euthanization 04.11.19

- Necroscopy
  - Xenograft size
  - Secondary tumor left shoulder
  - Secondary tumor right shoulder
  - Blood sample
  - Tumor tissue for
    - Histology
    - RNA isolation
    - Protein isolation

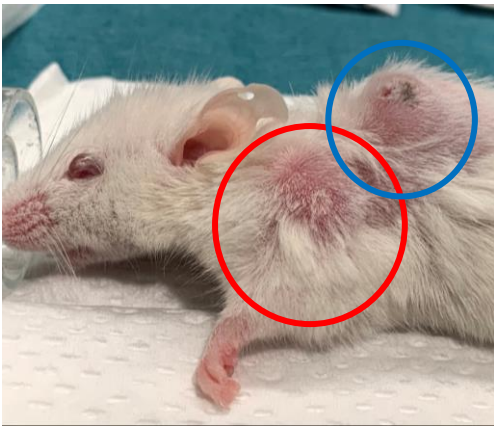

Blue; xenograft, Red; 2nd tumor

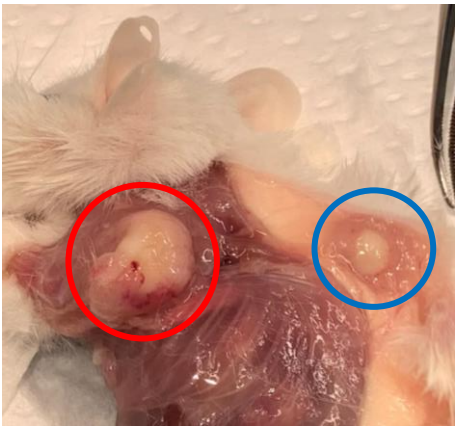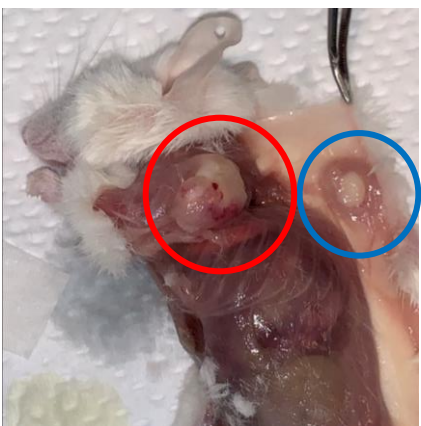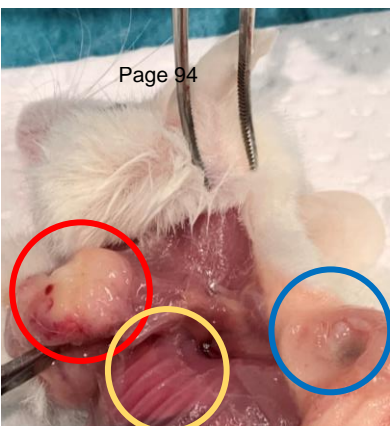

Whitish lungs

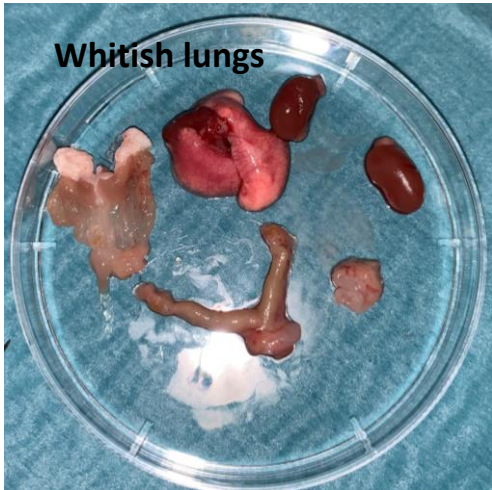

Whitish lungs

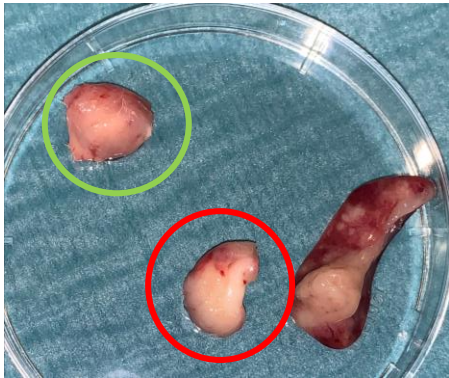

Enlarged spleen (2.2 cm) with white areas. Green; secondary tumor (right shoulder), Red; secondary tumor (left shoulder)

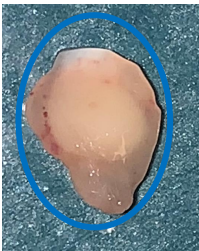

Xenograft

903™ Protein Saver Card  
For Research Use Only  
Not for use in diagnostic procedures

↑ Tuck Cover Here ↑

Name Mus 26 (P17-26) et al. beha. OMEGA3

Date 04.11.19 CHY-OMEGA3

Bloodcard for fatty acid profiling

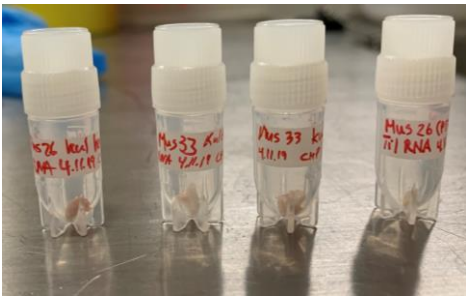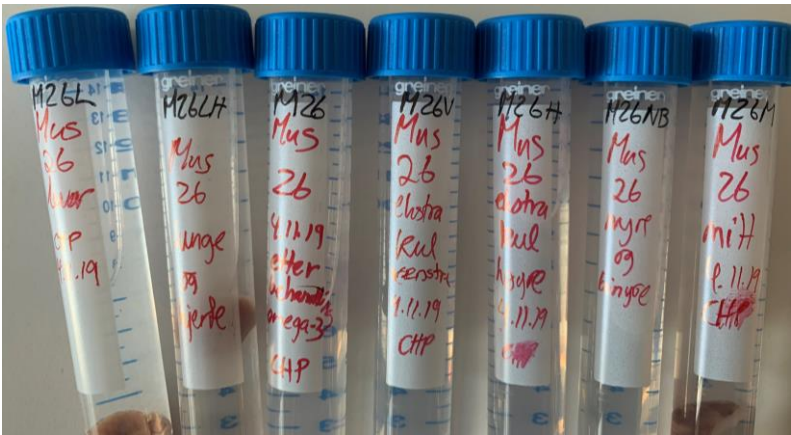

Samples collected for histology/HES staining

Supplementary figure 1-26-5. Score sheets

NTNU Score sheet FOTS: Avdeling for komparativ medisin (AKM) Responsible researcher: Pettersen Animal ID: (P17-26) 26 Wipp 4

| Parameter                                               | State                                        | Assessment scale | Date | Date | Date | Date | Date | Date | Date | Date | Date | Date | Date |
|---------------------------------------------------------|----------------------------------------------|------------------|------|------|------|------|------|------|------|------|------|------|------|
| General appearance                                      | Normal                                       | 0                | 20/7 | 26/8 | 29/8 | 2/9  | 4/9  | 6/9  | 9/9  | 11/9 | 13/9 | 16/9 | 18/9 |
|                                                         | Reduced grooming                             | 1                |      |      |      |      |      |      |      |      |      |      |      |
|                                                         | Minor distention of abdomen, rough hair coat | 3                |      |      |      |      |      |      |      |      |      |      |      |
|                                                         | Hunchback or distended abdomen, inactive     | 18               |      |      |      |      |      |      |      |      |      |      |      |
| Behaviour (Level of activity)                           | Normal                                       | 0                |      |      |      |      |      |      |      |      |      |      |      |
|                                                         | Slightly reduced                             | 1                |      |      |      |      |      |      |      |      |      |      |      |
|                                                         | Moderately reduced                           | 3                |      |      |      |      |      |      |      |      |      |      |      |
|                                                         | Distressed behaviour due to growing tumour   | 3                |      |      |      |      |      |      |      |      |      |      |      |
|                                                         | Obviously reduced                            | 5                |      |      |      |      |      |      |      |      |      |      |      |
| Body weight (Compared to body weight before experiment) | Isolated, inactive, lethargic                | 18               |      |      |      |      |      |      |      |      |      |      |      |
|                                                         | Body weight:                                 |                  | 24,6 |      | 23,4 | 23,5 | 23,8 | 23,1 | 24,2 | 24,9 | 23,6 | 23,5 |      |
|                                                         | No loss                                      | 0                |      |      |      |      |      |      |      |      |      |      |      |
|                                                         | Loss < 5%                                    | 1                |      |      |      |      |      |      |      |      |      |      |      |
|                                                         | Loss 5-9%                                    | 3                |      |      |      |      |      |      |      |      |      |      |      |
| Clinical signs (Infection, bleeding, discoloration)     | Loss 10-14%                                  | 5                |      |      |      |      |      |      |      |      |      |      |      |
|                                                         | Loss > 15%                                   | 18               |      |      |      |      |      |      |      |      |      |      |      |
|                                                         | Normal                                       | 0                |      |      |      |      |      |      |      |      |      |      |      |
|                                                         | Minor irritation around surgical wound       | 1                |      |      |      |      |      |      |      |      |      |      |      |
|                                                         | Moderate irritation/infected surgical wound  | 3                |      |      |      |      |      |      |      |      |      |      |      |

0-3: Normal  
4-9: Pay attention to health state and consider treatment  
10-13: Pay close attention to health state, consider treatment or euthanasia  
14-18: Euthanasia \*Start treatment with antibiotics. If no effect within 3 days, euthanize the animal

NTNU Score sheet FOTS: Avdeling for komparativ medisin (AKM) Responsible researcher: Pettersen Animal ID: (P17-26) 26 Wipp 4

| Parameter                                               | State                                        | Assessment scale | Date | Date | Date | Date | Date | Date | Date | Date  | Date  | Date  | Date |
|---------------------------------------------------------|----------------------------------------------|------------------|------|------|------|------|------|------|------|-------|-------|-------|------|
| General appearance                                      | Normal                                       | 0                | 20/7 | 22/7 | 25/7 | 30/7 | 2/10 | 4/10 | 8/10 | 11/10 | 14/10 | 15/10 |      |
|                                                         | Reduced grooming                             | 1                |      |      |      |      |      |      |      |       |       |       |      |
|                                                         | Minor distention of abdomen, rough hair coat | 3                |      |      |      |      |      |      |      |       |       |       |      |
|                                                         | Hunchback or distended abdomen, inactive     | 18               |      |      |      |      |      |      |      |       |       |       |      |
| Behaviour (Level of activity)                           | Normal                                       | 0                |      |      |      |      |      |      |      |       |       |       |      |
|                                                         | Slightly reduced                             | 1                |      |      |      |      |      |      |      |       |       |       |      |
|                                                         | Moderately reduced                           | 3                |      |      |      |      |      |      |      |       |       |       |      |
|                                                         | Distressed behaviour due to growing tumour   | 3                |      |      |      |      |      |      |      |       |       |       |      |
|                                                         | Obviously reduced                            | 5                |      |      |      |      |      |      |      |       |       |       |      |
| Body weight (Compared to body weight before experiment) | Isolated, inactive, lethargic                | 18               |      |      |      |      |      |      |      |       |       |       |      |
|                                                         | Body weight:                                 |                  | 24,2 | 24,8 | 23,7 | 24,7 | 25,2 | 24,2 | 23,8 | 23,2  | 23,1  | 23,3  |      |
|                                                         | No loss                                      | 0                |      |      |      |      |      |      |      |       |       |       |      |
|                                                         | Loss < 5%                                    | 1                |      |      |      |      |      |      |      |       |       |       |      |
|                                                         | Loss 5-9%                                    | 3                |      |      |      |      |      |      |      |       |       |       |      |
| Clinical signs (Infection, bleeding, discoloration)     | Loss 10-14%                                  | 5                |      |      |      |      |      |      |      |       |       |       |      |
|                                                         | Loss > 15%                                   | 18               |      |      |      |      |      |      |      |       |       |       |      |
|                                                         | Normal                                       | 0                |      |      |      |      |      |      |      |       |       |       |      |
|                                                         | Minor irritation around surgical wound       | 1                |      |      |      |      |      |      |      |       |       |       |      |
|                                                         | Moderate irritation/infected surgical wound  | 3                |      |      |      |      |      |      |      |       |       |       |      |

0-3: Normal  
4-9: Pay attention to health state and consider treatment  
10-13: Pay close attention to health state, consider treatment or euthanasia  
14-18: Euthanasia \*Start treatment with antibiotics. If no effect within 3 days, euthanize the animal

NTNU Score sheet FOTS: Avdeling for komparativ medisin (AKM) Responsible researcher: Pettersen Animal ID: (P17-26) 26 Wipp 4

| Parameter                                               | State                                        | Assessment scale | Date  | Date  | Date  | Date  | Date  | Date  | Date  | Date  | Date | Date | Date |
|---------------------------------------------------------|----------------------------------------------|------------------|-------|-------|-------|-------|-------|-------|-------|-------|------|------|------|
| General appearance                                      | Normal                                       | 0                | 16/10 | 19/10 | 21/10 | 23/10 | 23/10 | 29/10 | 29/10 | 30/10 | 1/11 | 8/11 |      |
|                                                         | Reduced grooming                             | 1                |       |       |       |       |       |       |       |       |      |      |      |
|                                                         | Minor distention of abdomen, rough hair coat | 3                |       |       |       |       |       |       |       |       |      |      |      |
|                                                         | Hunchback or distended abdomen, inactive     | 18               |       |       |       |       |       |       |       |       |      |      |      |
| Behaviour (Level of activity)                           | Normal                                       | 0                |       |       |       |       |       |       |       |       |      |      |      |
|                                                         | Slightly reduced                             | 1                |       |       |       |       |       |       |       |       |      |      |      |
|                                                         | Moderately reduced                           | 3                |       |       |       |       |       |       |       |       |      |      |      |
|                                                         | Distressed behaviour due to growing tumour   | 3                |       |       |       |       |       |       |       |       |      |      |      |
|                                                         | Obviously reduced                            | 5                |       |       |       |       |       |       |       |       |      |      |      |
| Body weight (Compared to body weight before experiment) | Isolated, inactive, lethargic                | 18               |       |       |       |       |       |       |       |       |      |      |      |
|                                                         | Body weight:                                 |                  | 23,3  | 24,3  | 24,8  | 24,1  | 25,7  |       |       |       |      |      |      |
|                                                         | No loss                                      | 0                |       |       |       |       |       |       |       |       |      |      |      |
|                                                         | Loss < 5%                                    | 1                |       |       |       |       |       |       |       |       |      |      |      |
|                                                         | Loss 5-9%                                    | 3                |       |       |       |       |       |       |       |       |      |      |      |
| Clinical signs (Infection, bleeding, discoloration)     | Loss 10-14%                                  | 5                |       |       |       |       |       |       |       |       |      |      |      |
|                                                         | Loss > 15%                                   | 18               |       |       |       |       |       |       |       |       |      |      |      |
|                                                         | Normal                                       | 0                |       |       |       |       |       |       |       |       |      |      |      |
|                                                         | Minor irritation around surgical wound       | 1                |       |       |       |       |       |       |       |       |      |      |      |
|                                                         | Moderate irritation/infected surgical wound  | 3                |       |       |       |       |       |       |       |       |      |      |      |

0-3: Normal  
4-9: Pay attention to health state and consider treatment  
10-13: Pay close attention to health state, consider treatment or euthanasia  
14-18: Euthanasia \*Start treatment with antibiotics. If no effect within 3 days, euthanize the animal



**Supplementary figure 1-26-6.**  
Mouse, xenograft and  
secondary tumor growth  
curves

Weight curve

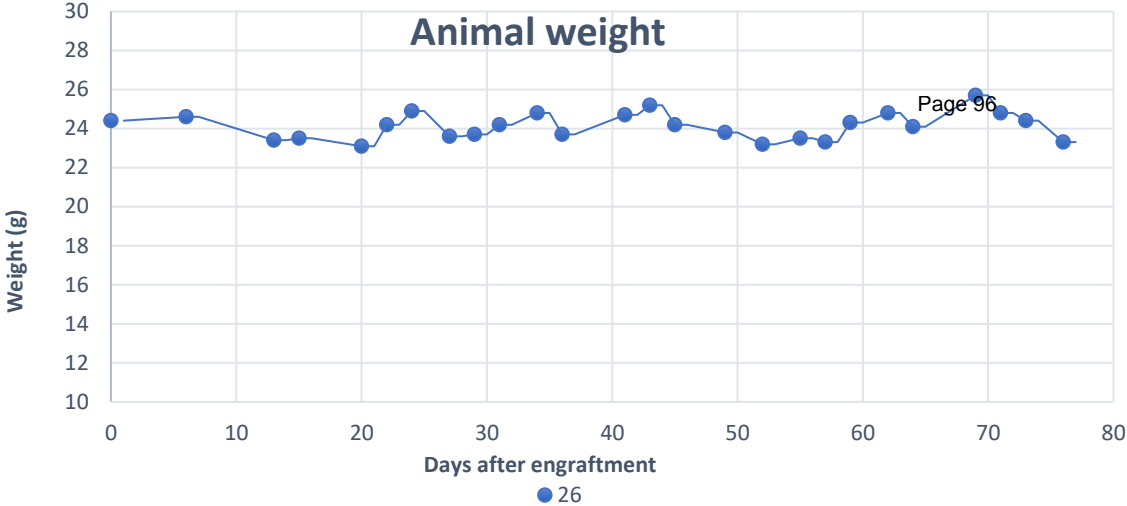

Xenograft growth curve

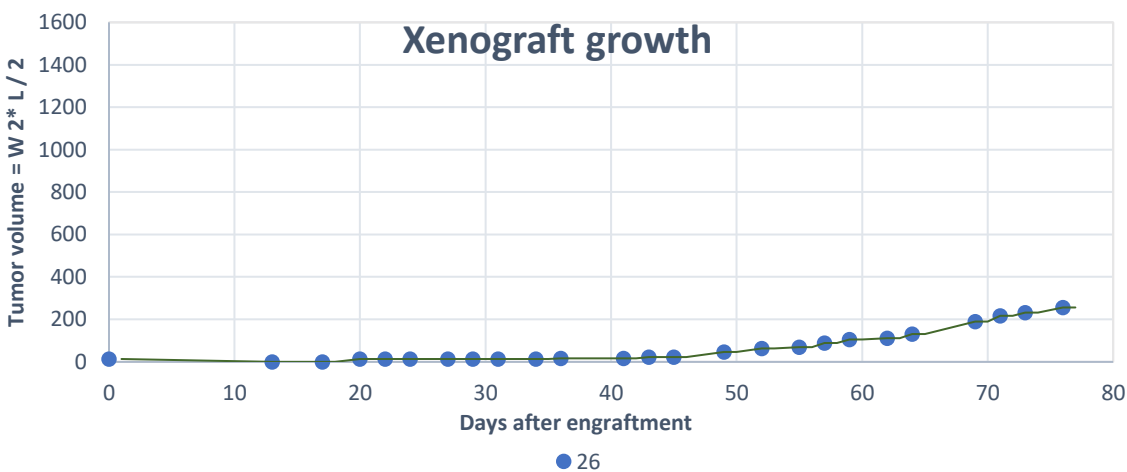

Secondary tumor growth curve

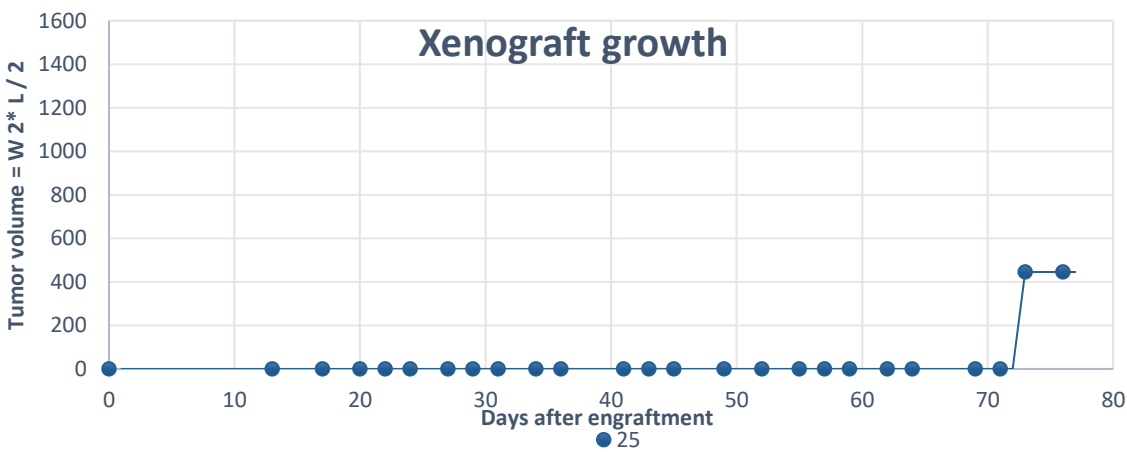

- 
- A photograph of a single, irregularly shaped, light brown, translucent object, possibly a piece of wood or bark, resting on a dark, textured surface. The object has a mottled appearance with some darker spots and a slightly rough texture. The background is a dark, greenish-blue material with a fine, pebbled texture.



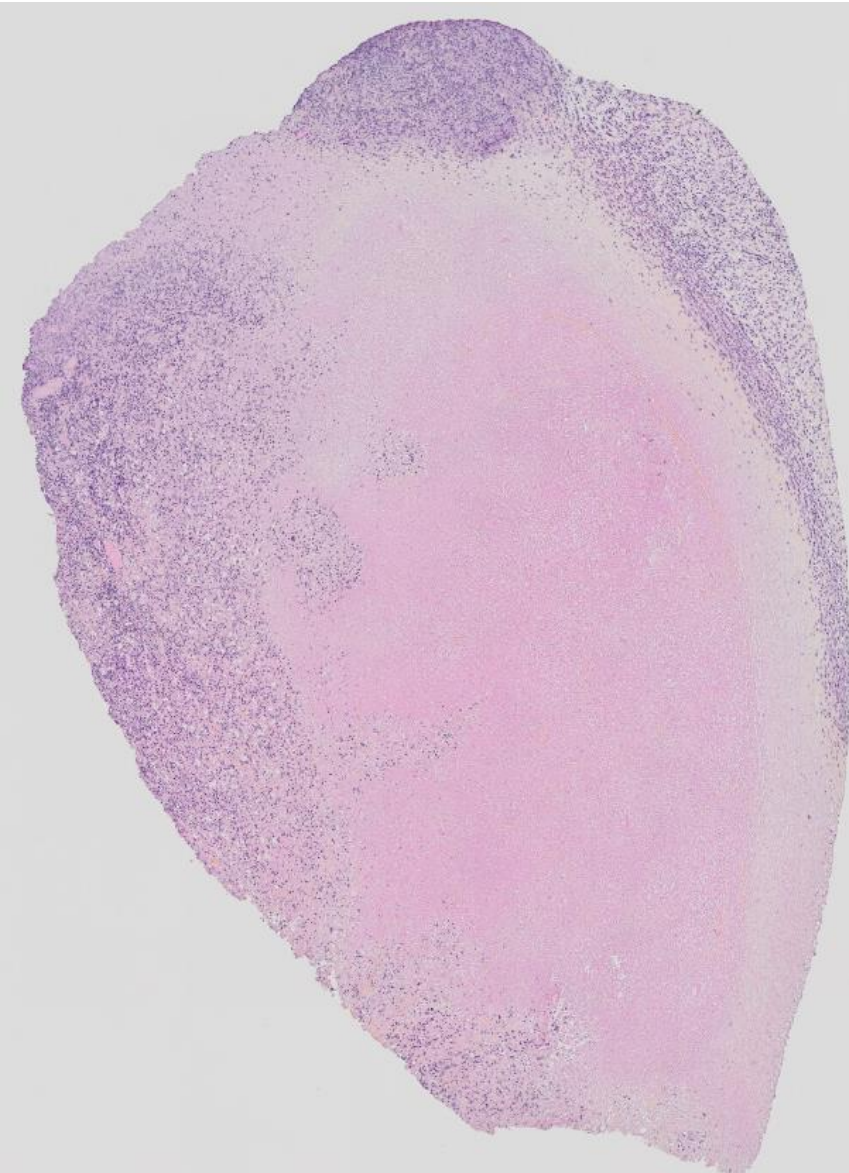

**Mouse 26 X (xenograft)**

- HES staining
  - Hematoxylin – blue – nuclear staining
  - Eosin – pink – Extracellular matrix and cytoplasm
  - Safran – yellow – stains collagen fibers/connective tissue
- Large necrotic area in the middle of the xenograft
- Lymphoid tumor cells surrounding the xenograft
- Seems like the lymphoid cells have «strangled» the xenograft

**Supplementary figure 1-26-7.**  
Histology pictures

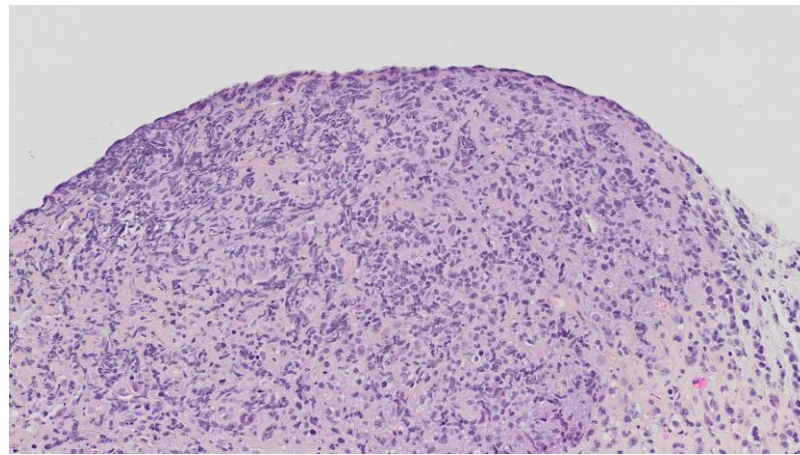

**Mouse 26 X (xenograft)**

Page 99

Compact tissue with tumor cells

- Some unregular nuclei
- Several mitoses

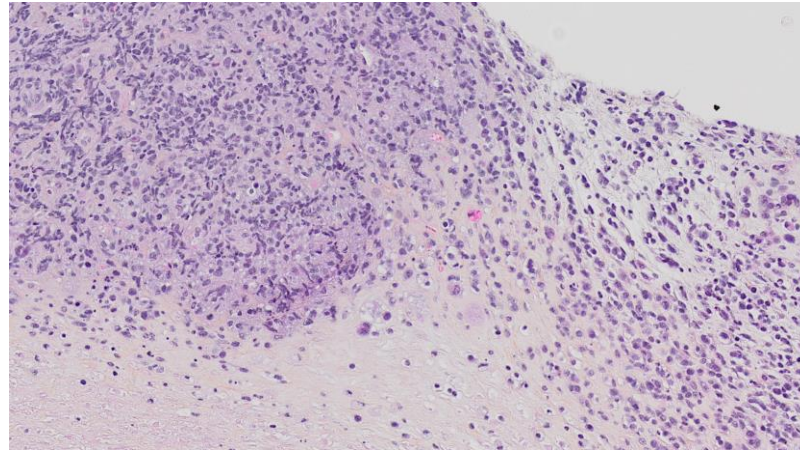

Border from lymphoid cancer cells to  
necrotic tissue

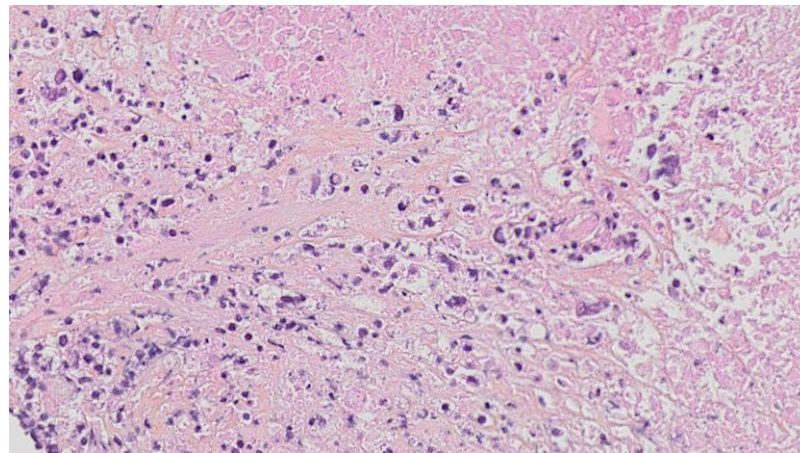

Necrotic tissue



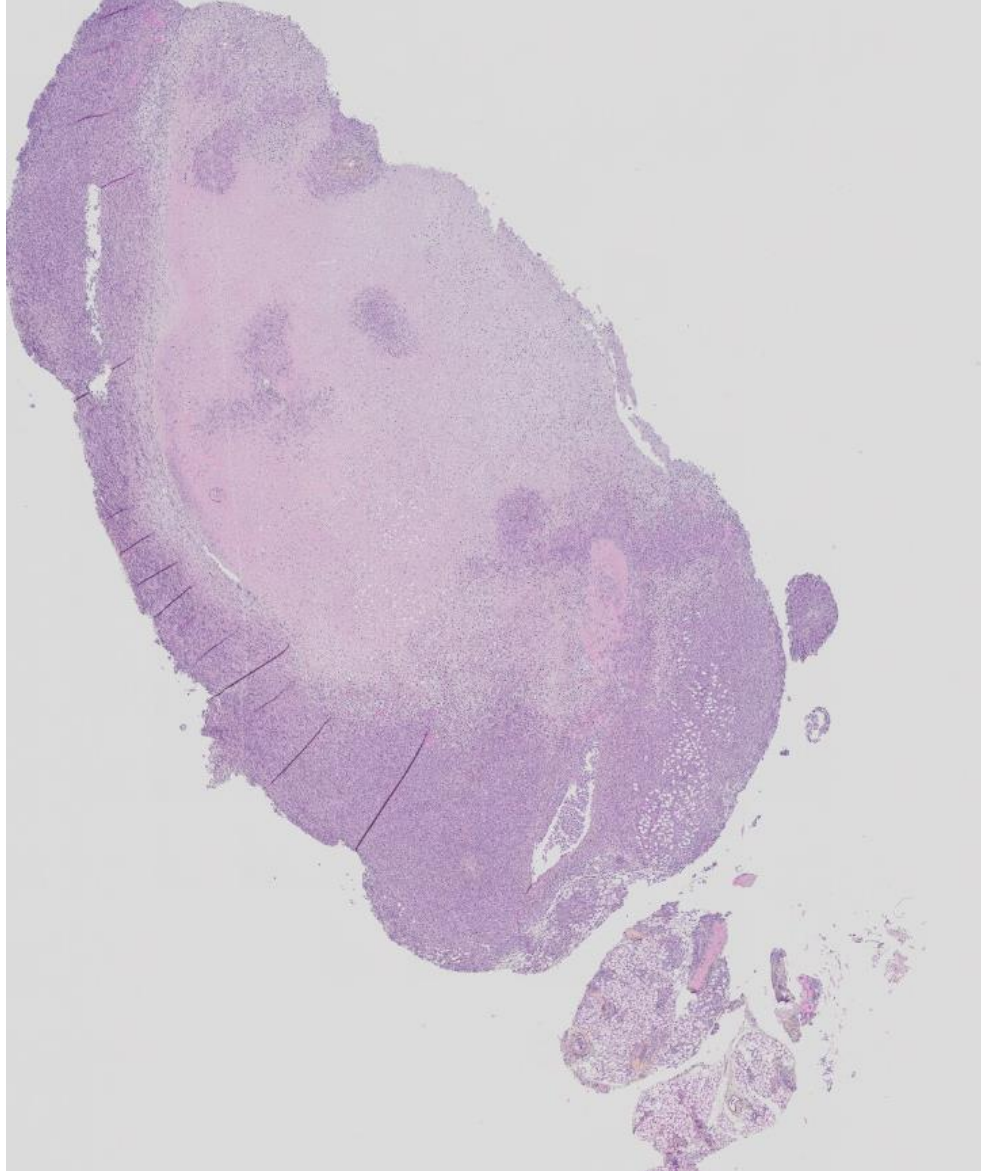

**Mouse 26 H (tumor right shoulder)**

- Necrotic tissue in the middle
- Lymphoid tumor cells

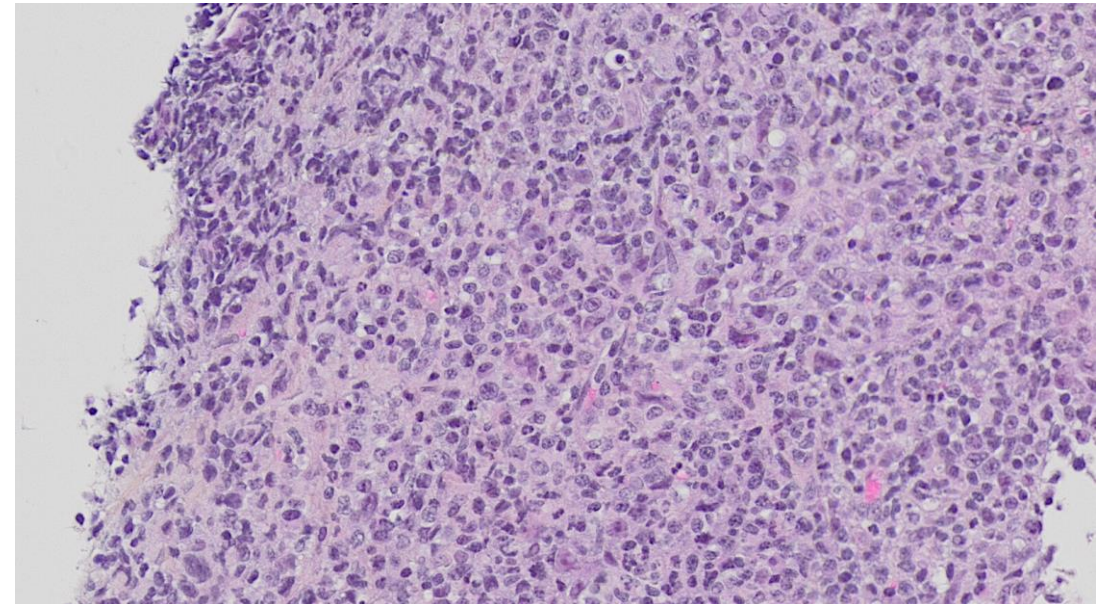

**Mouse 26 V (tumor left shoulder)**

- Lymphoid tumor cells
- Necrosis in the middle

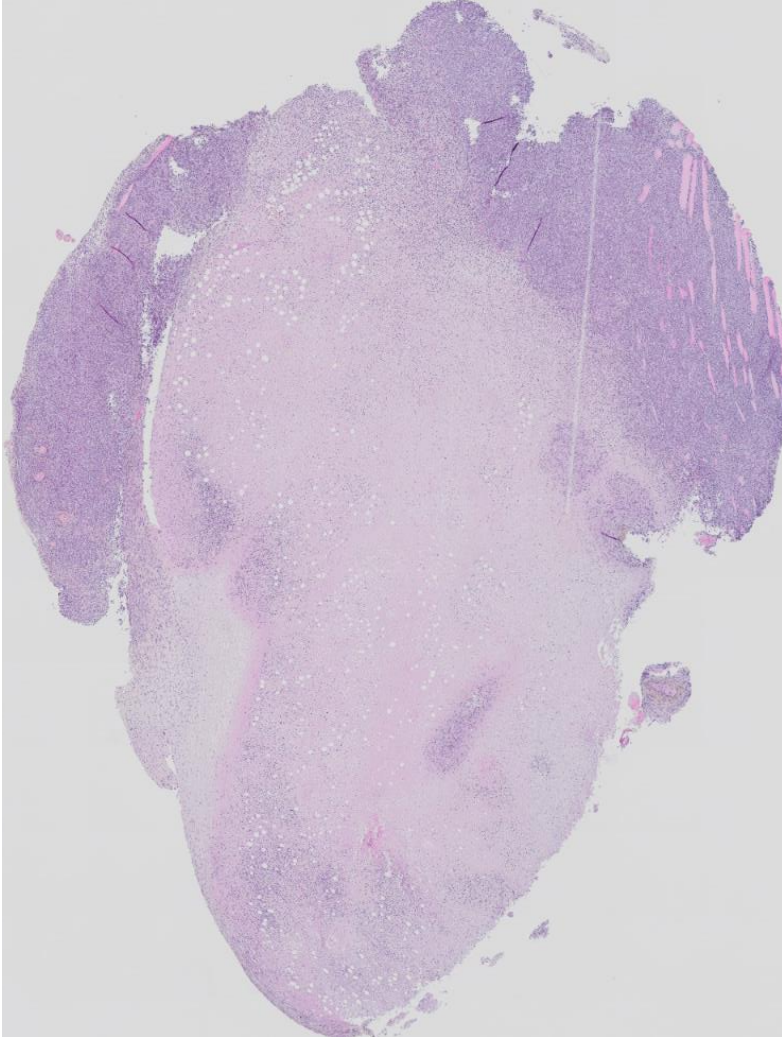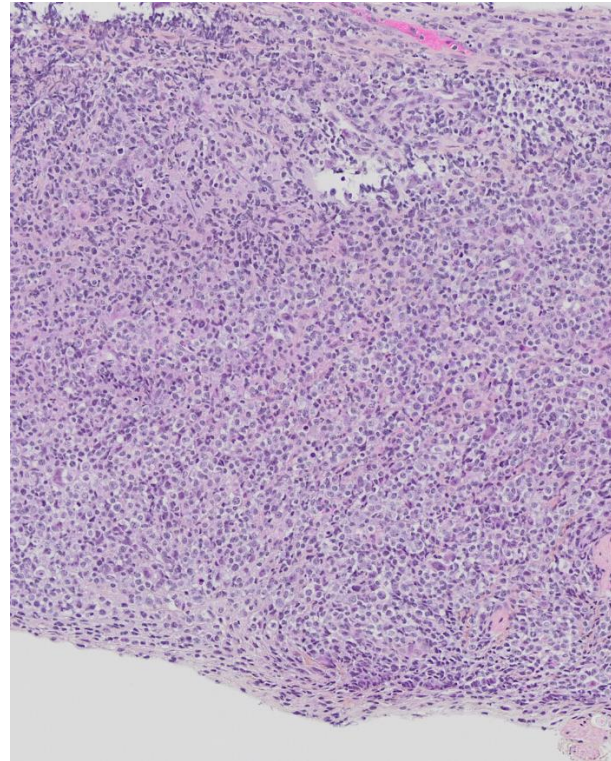



## Supplementary figure 1-26-7. Histology pictures

### Mouse 26 LH (Lung)

- Dense areas of tumor tissue in the lungs
- Lymphoid tumor cells

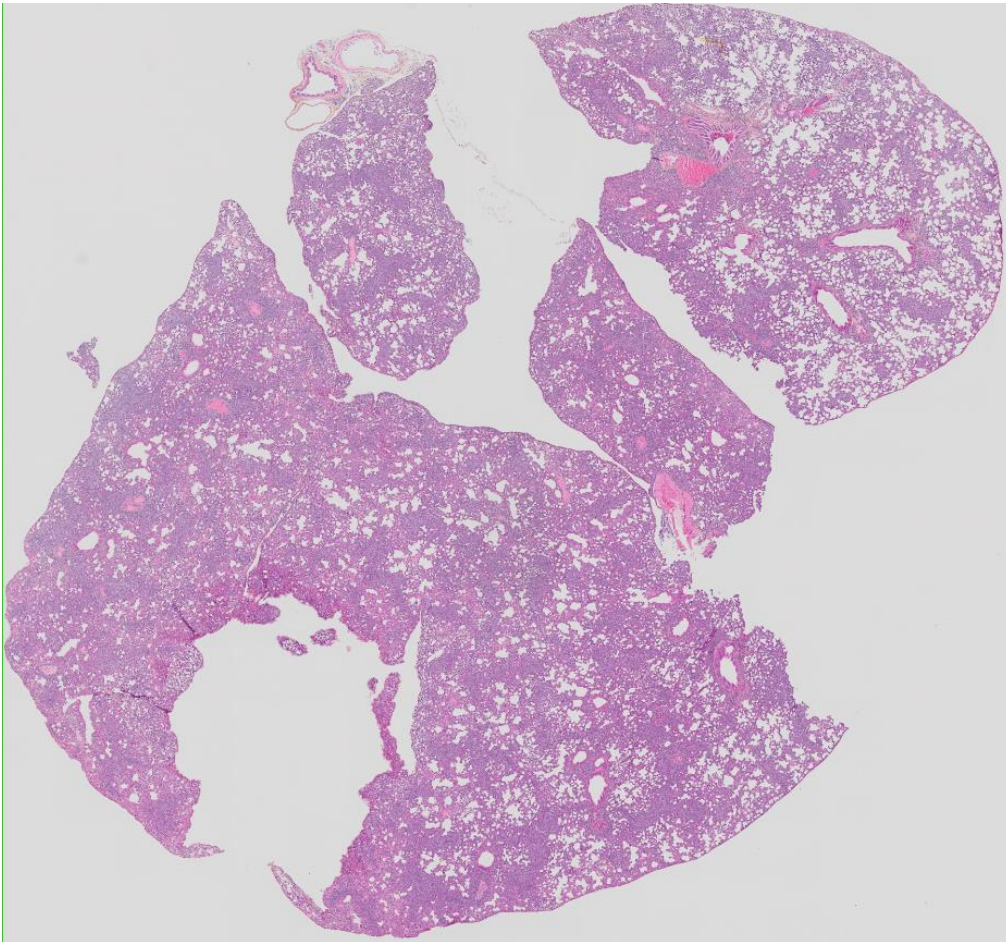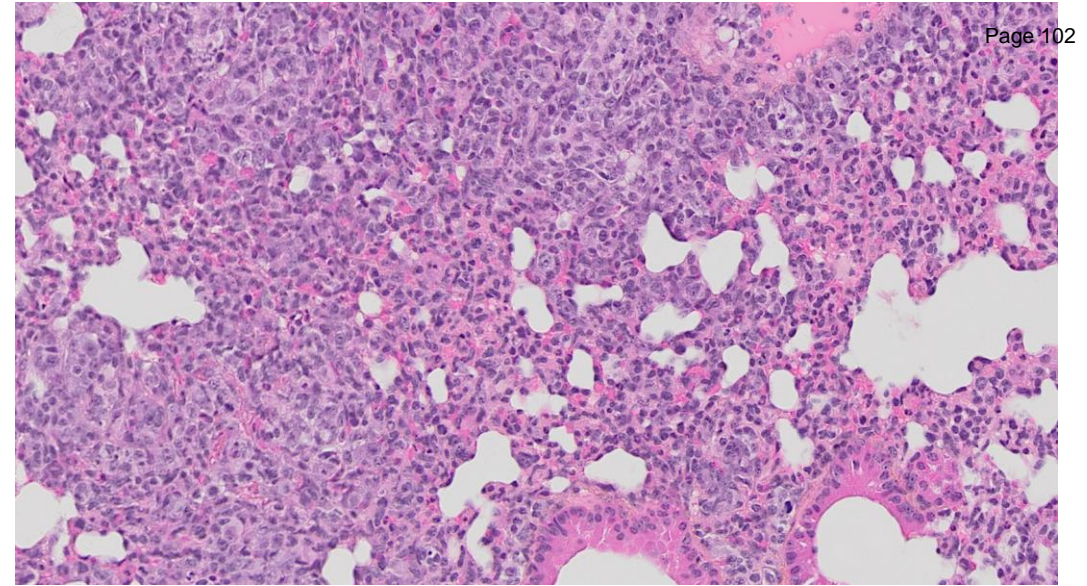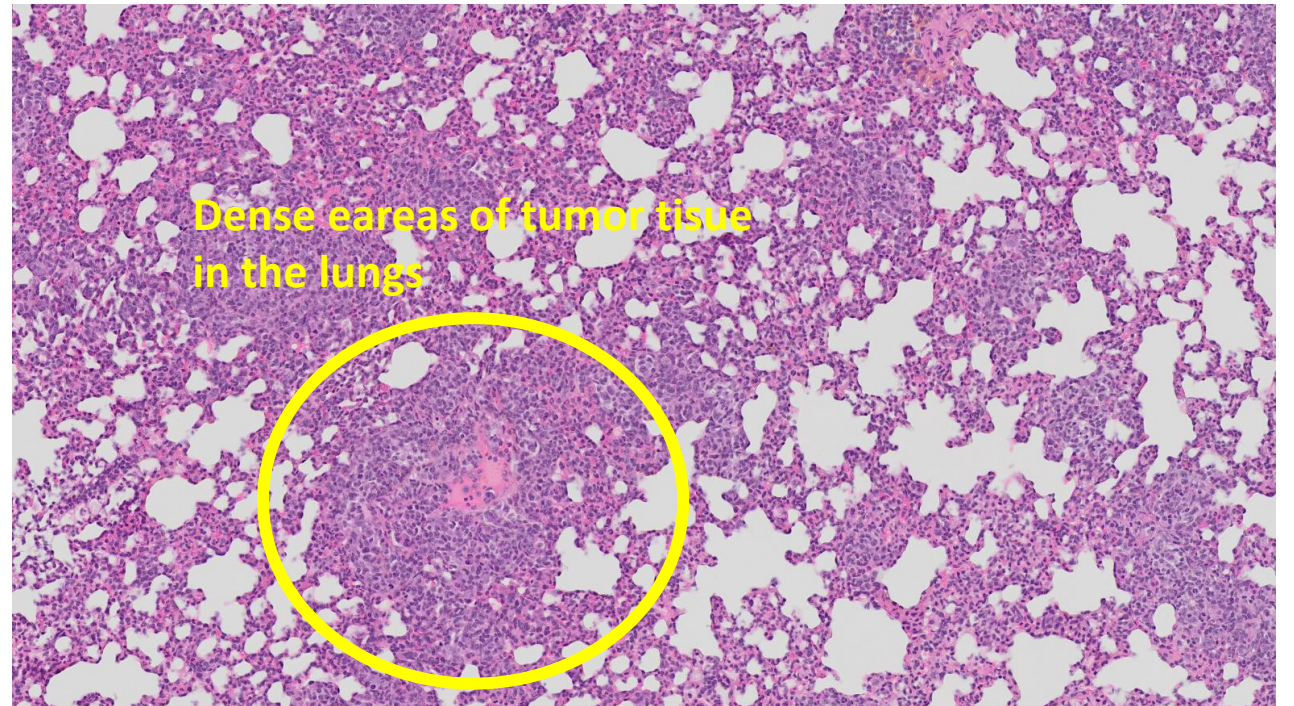



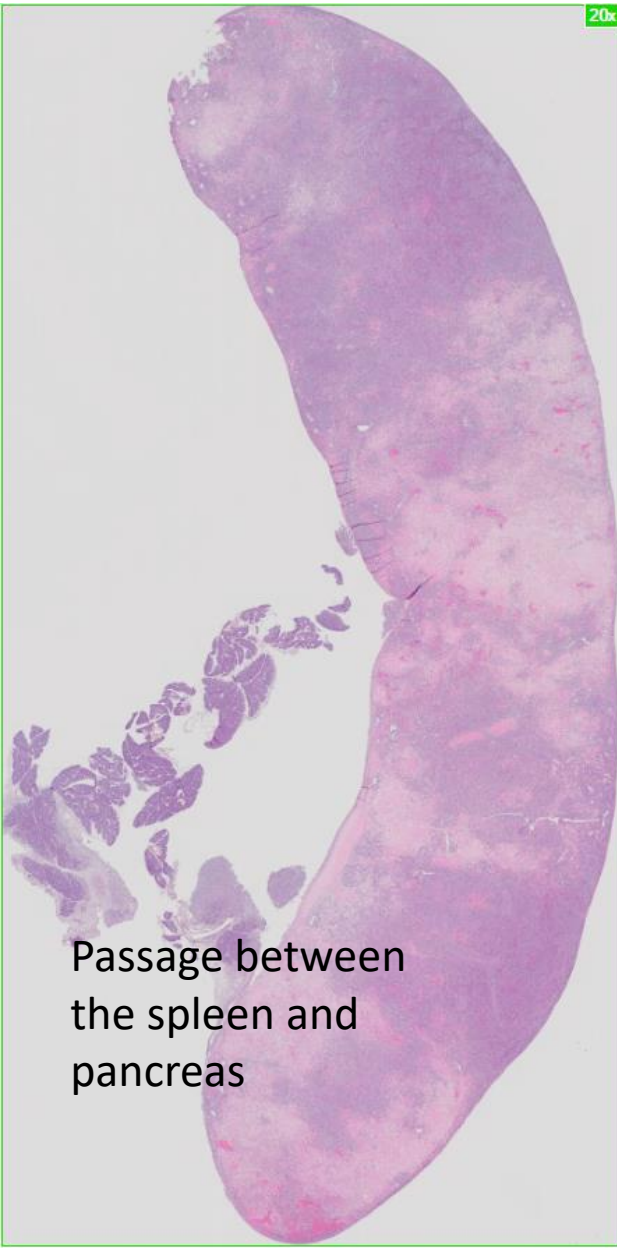

### Mouse 26 M (Spleen)

- Large spleen (2.2 cm, ca 3 when not bent)
- Pancreas attached
- White necrotic fields
- Plenty tumor cells in the spleen
- Possible bleedings in the spleen

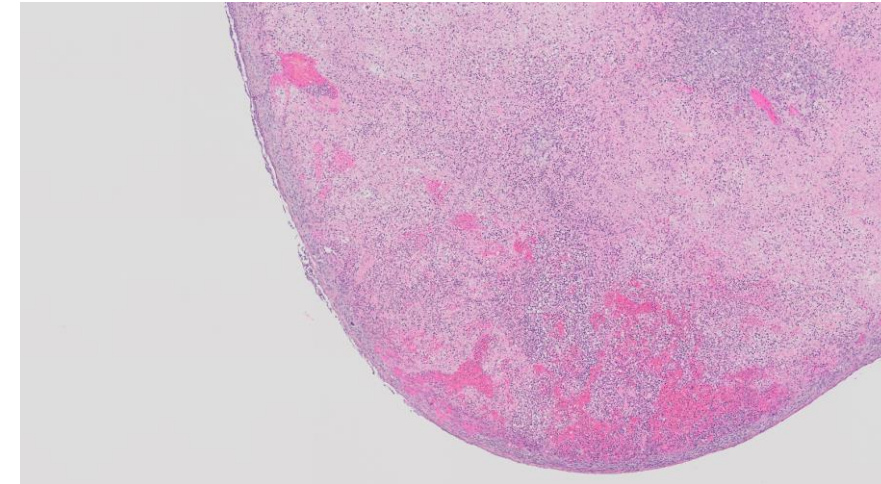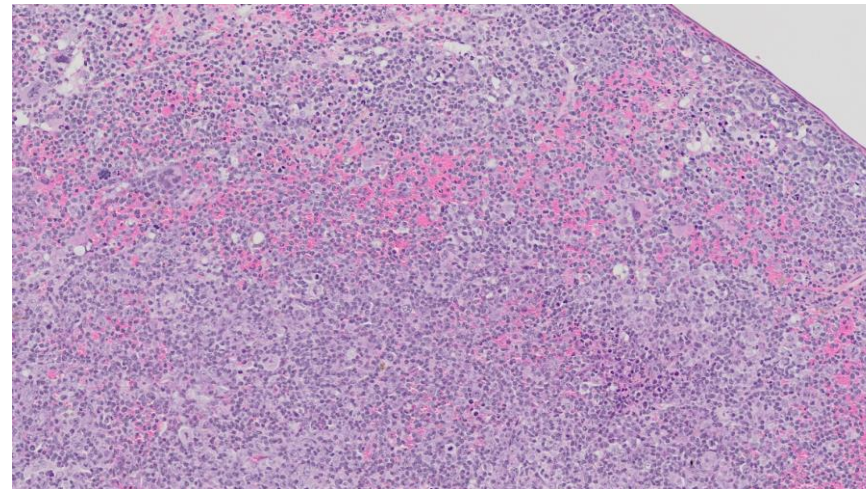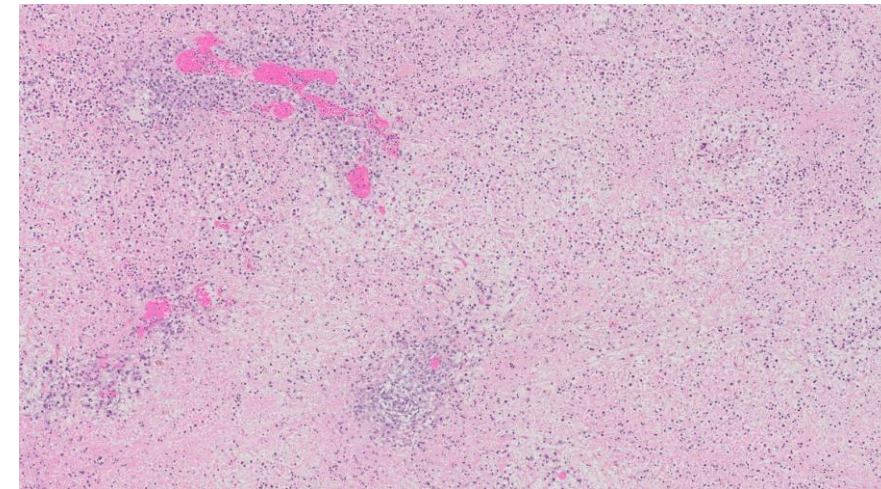



Supplementary figure 1-26-7. Histology pictures

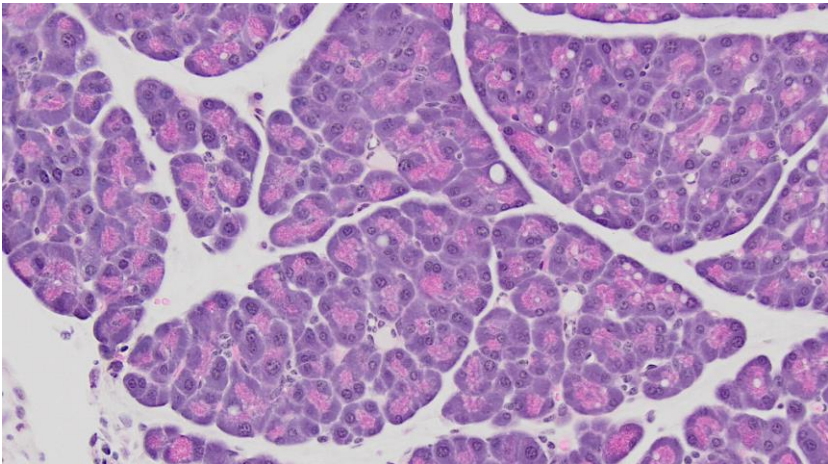

Pancreatic cells

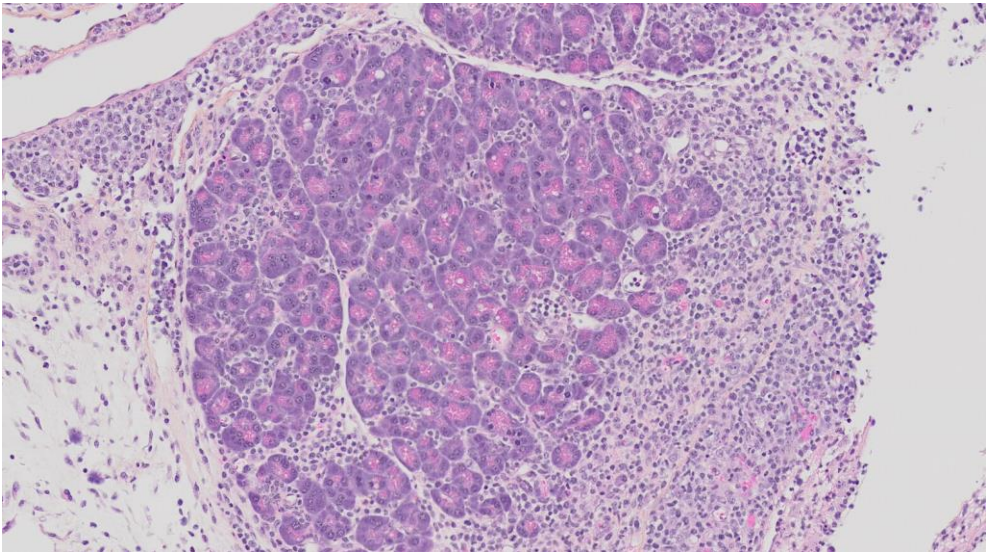

Pancreatic cells infiltrated by tumor cells

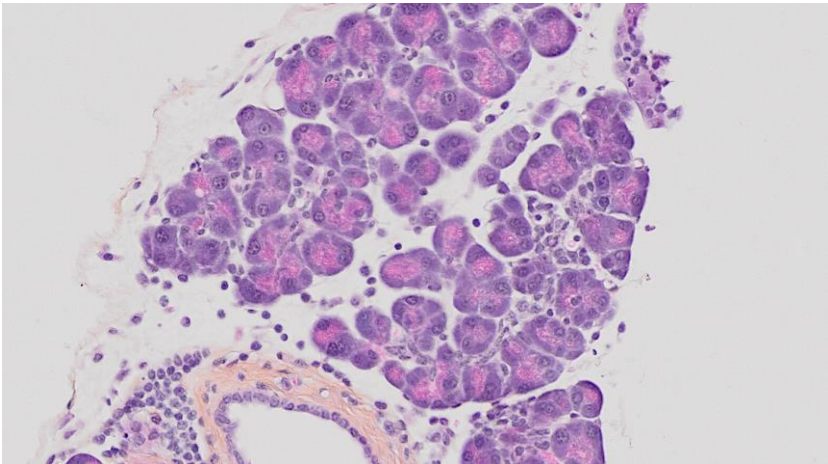

Pancreatic cells infiltrated by tumor cells

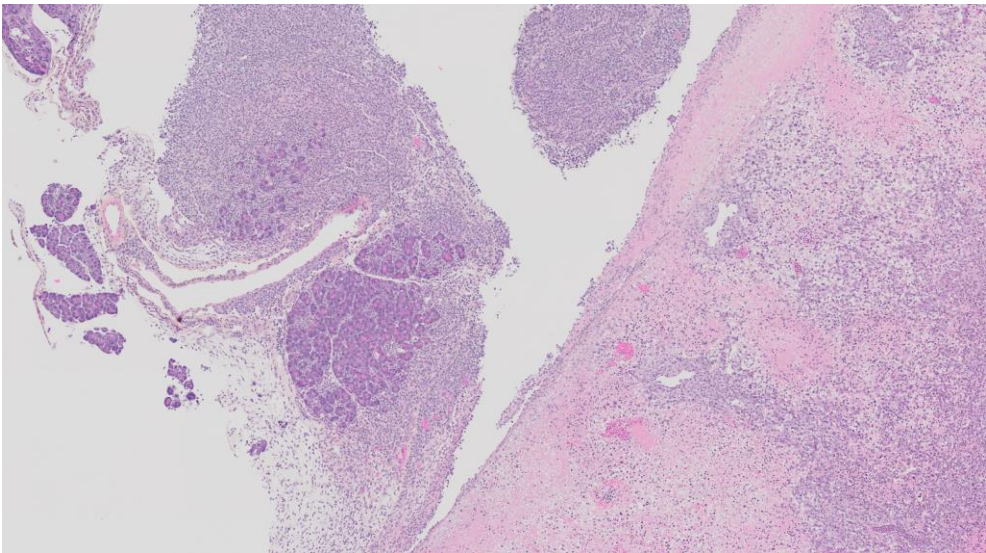

Passage between the spleen and pancreas



## Supplementary figure 1-26-8. Histology and immunohistochemistry pictures of secondary tumor (left)

Page 105

### Mouse 26 V (tumor left shoulder)

- Lymphoma
- IHC staining of Ki67 and CD45
- EBER-ISH staining of EBV

Mouse

HES

Ki67

CD45

EBER-ISH

#26

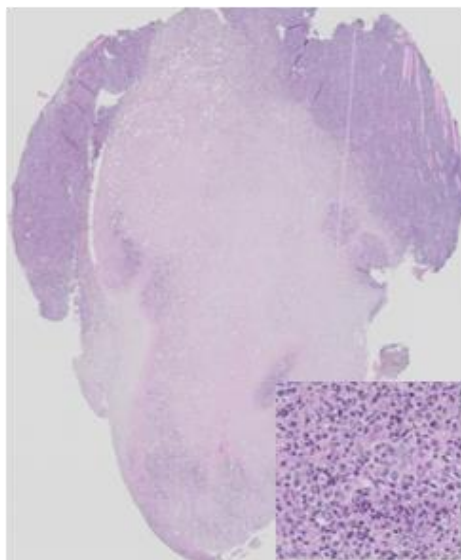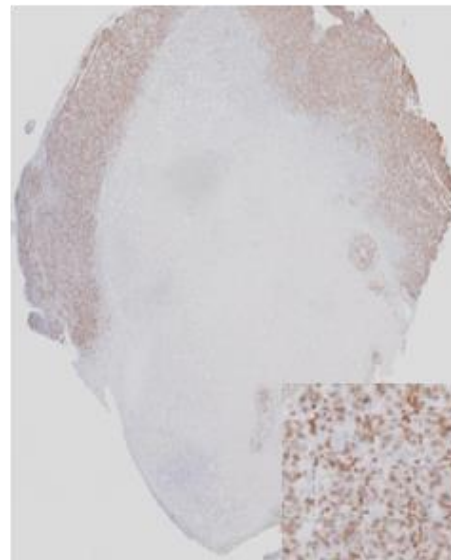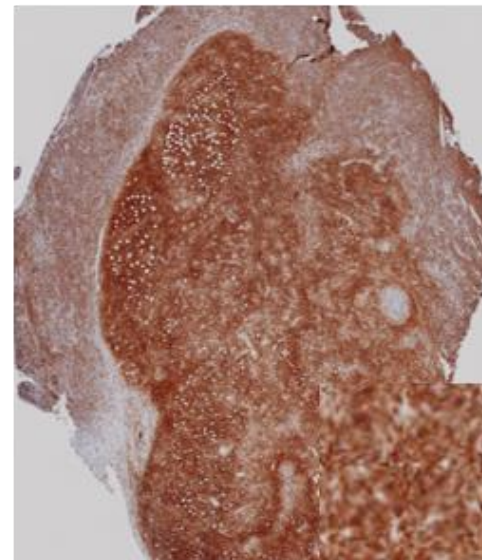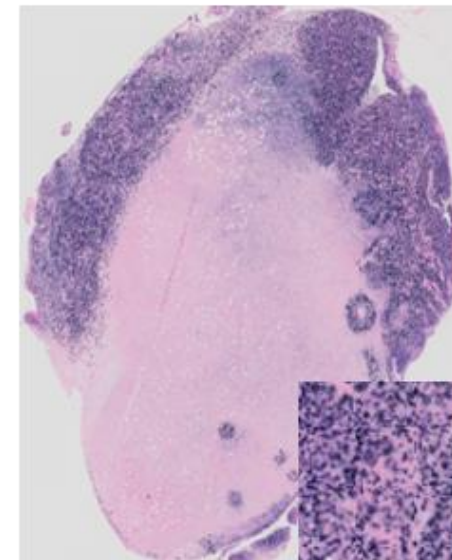



## Mouse 27

- Surgery date: 21.08.19
  - Age (weeks) 31
  - Weight (g) 22
  - Tumor fragment P18-1a
  - Fragment size 3 x 3
  - Ear mark 1

### Supplementary figure 1-27-1.

Pictures from the engraftment day

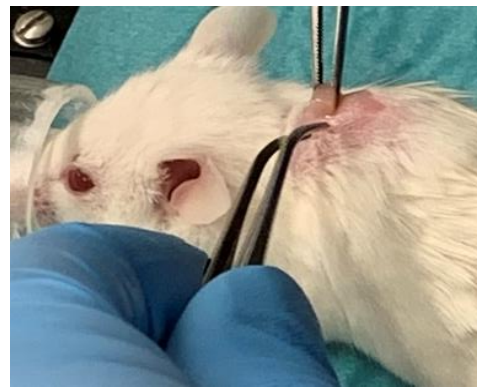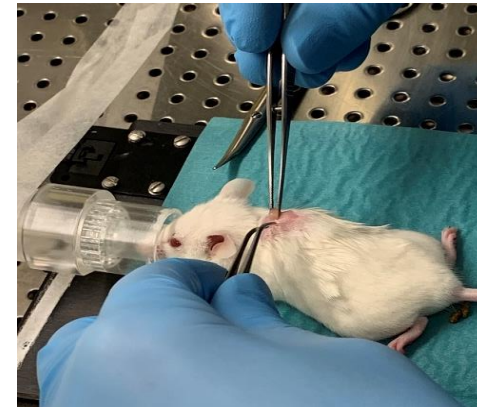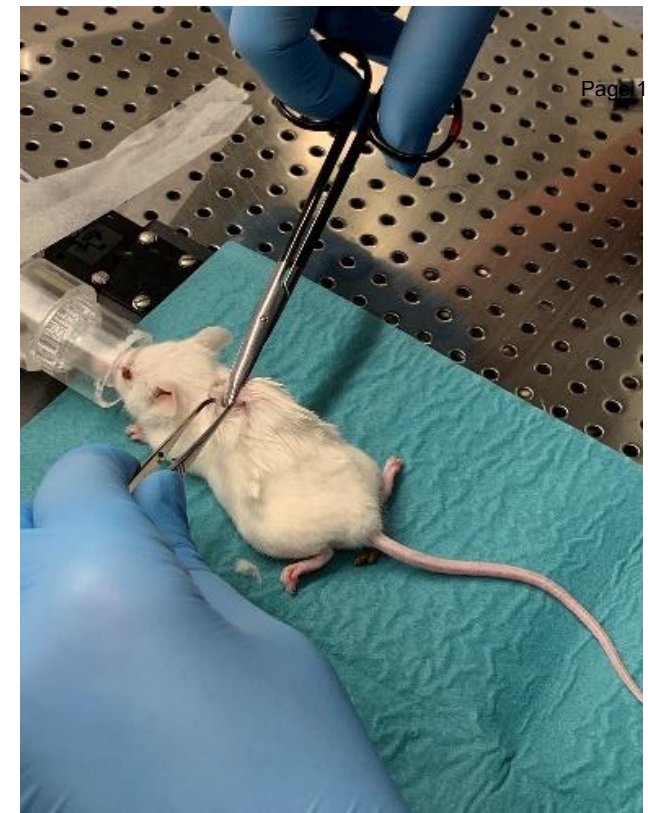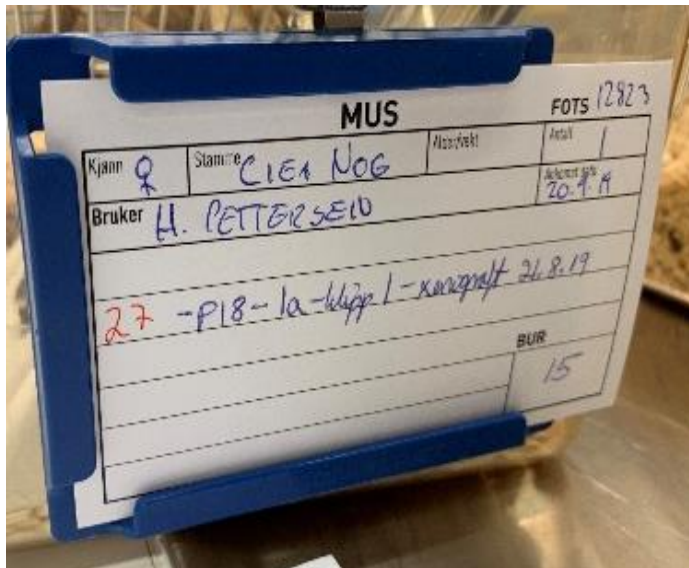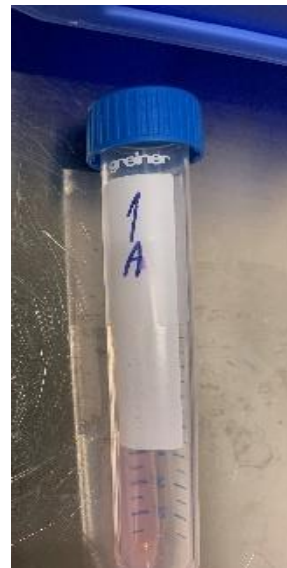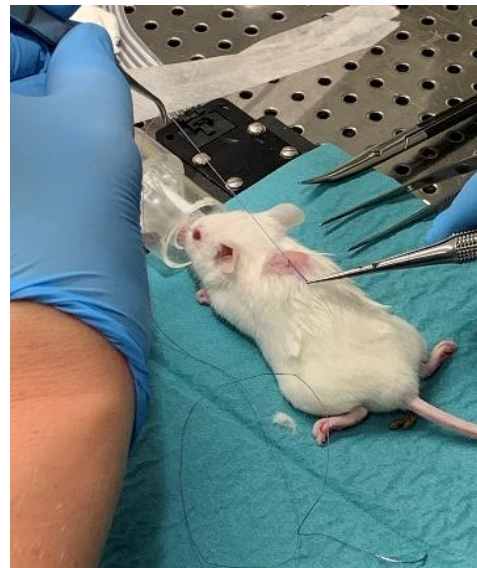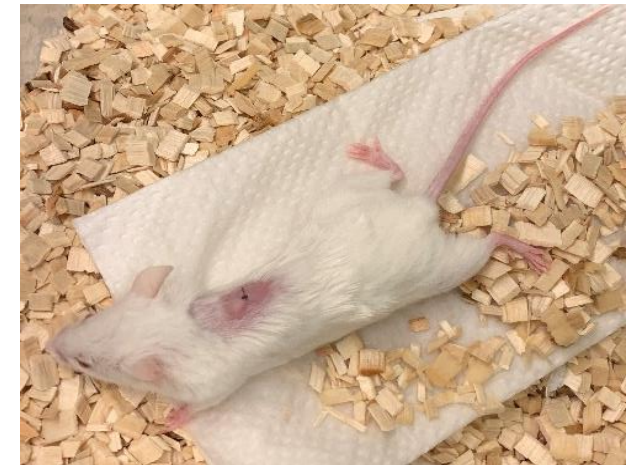

Supplementary figure 1-27-2. Pictures from follow up and xenograft size measurement

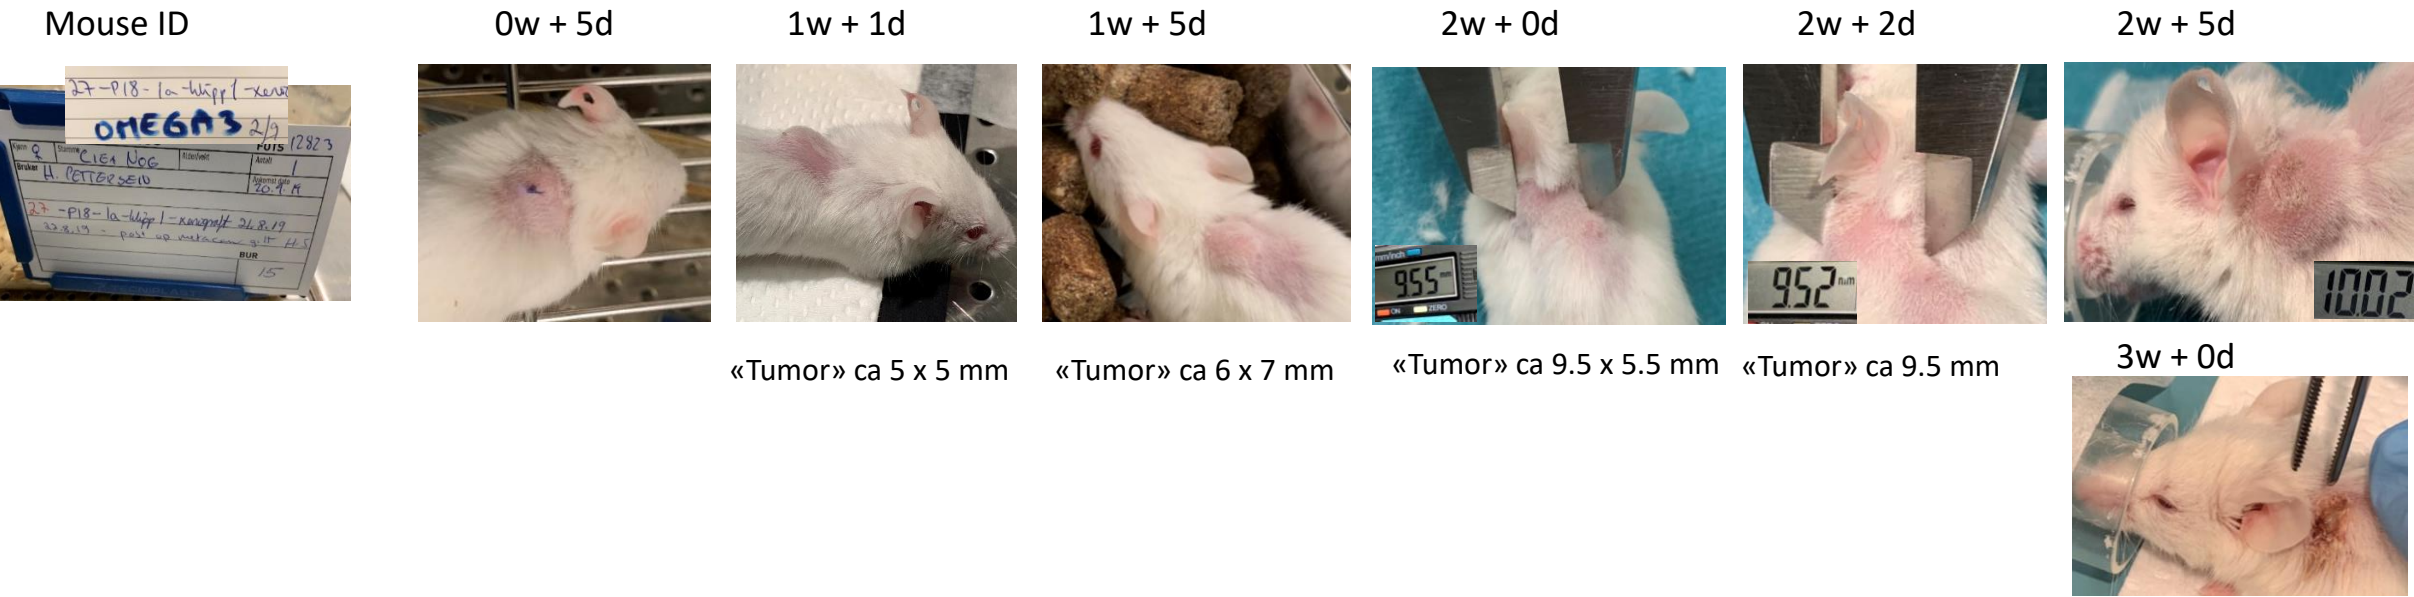



Treatment:

- Smartfish Remune with fish oil
- Blodsamples taken before and after treatment

| MUS                                 |                 |            | FOTS 12823           |
|-------------------------------------|-----------------|------------|----------------------|
| Kjønn ♀                             | Stamme CIEA M08 | Alder/vekt | Antall 2 Page 108    |
| Bruker Pettersen Caroline H         |                 |            | Ankomst dato 20.9.19 |
| 27-P18-1a-hipp(1)-xerografi 21.8.19 |                 |            |                      |
| 29-P18-2a-hipp(3)-xerografi 21.8.19 |                 |            |                      |
| OMEGA 3 2/9                         |                 |            | BUR                  |
|                                     |                 |            | 15                   |

~ OMEGA - 3 ~

|            |                  |        |         |
|------------|------------------|--------|---------|
| 30.08.2019 |                  |        |         |
| 02.09.2019 | 142,4g           | 131,3g | (27)    |
| 03.09.2019 | 142,8g           | 131,8g |         |
| 04.09.2019 | 144,5            | 133,9  | (29)    |
| 05.09.2019 | 141,2            | 128,3  |         |
| 06.09.2019 | 141,2            | vekt?  |         |
| 09.09.2019 | <del>141,2</del> |        |         |
| 10.09.2019 | 140,7            | 128,0  |         |
| 11.09.2019 | 141,4            |        | avlivet |
| 12.09.2019 |                  |        |         |

**Supplementary figure 1-27-3.** List over weight registrations of the drinking bottle (with Smartfish Remune Peach) before and after provided to the mice

Supplementary figure 1-27-4. Pictures from euthanization (11.09.19)

- Not the xenograft, but an abscess that was growing

Mus ID

19 dager post op

21 dager/avliving

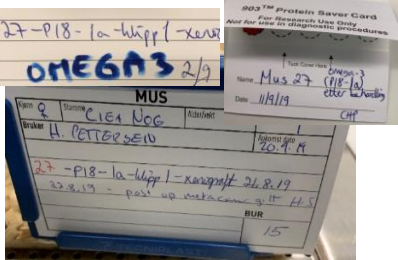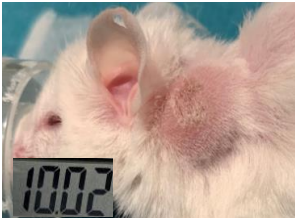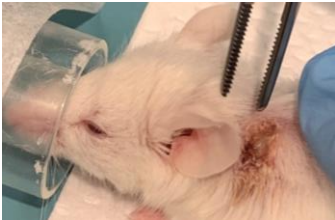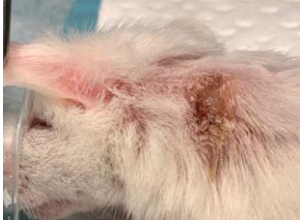

Scurvy wound, the «tumor» has burst. Turned out it was an abscess and not the xenograft growing.

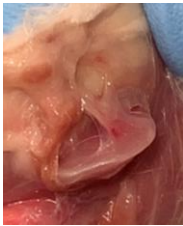

Small xenograft under the skin

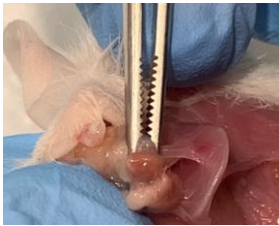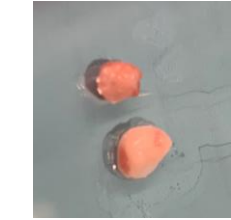

The largest fragment was divided into the 3 sample tubes, and the smallest fragment in a «left over» tube.



Supplementary figure 1-27-5. Score sheet

NTNU

Score sheet FOTS:  
Avdeling for komparativ medisin (AKM)

Responsible researcher:  
Petterson

Animal ID:  
(P18-1a) 27  
Wipr 1

| Parameter                                               | State                                        | Assessment scale | Date | Date | Date  | Date | Date | Date | Date | Date | Date | Date |
|---------------------------------------------------------|----------------------------------------------|------------------|------|------|-------|------|------|------|------|------|------|------|
| General appearance                                      | Normal                                       | 0                | 21/8 | 24/8 | 29/8  | 2/9  | 4/9  | 6/9  | 9/9  | 11/9 |      |      |
|                                                         | Reduced grooming                             | 1                |      |      |       |      |      |      |      |      |      |      |
|                                                         | Minor distention of abdomen, rough hair coat | 3                |      |      |       |      |      |      |      |      |      |      |
|                                                         | Hunchback or distended abdomen, inactive     | 18               |      |      |       |      |      |      |      |      |      |      |
| Behaviour (Level of activity)                           | Normal                                       | 0                |      |      |       |      |      |      |      |      |      |      |
|                                                         | Slightly reduced                             | 1                |      |      |       |      |      |      |      |      |      |      |
|                                                         | Moderately reduced                           | 3                |      |      |       |      |      |      |      |      |      |      |
|                                                         | Distressed behaviour due to growing tumour   | 3                |      |      |       |      |      |      |      |      |      |      |
|                                                         | Obviously reduced                            | 5                |      |      |       |      |      |      |      |      |      |      |
|                                                         | Isolated, inactive, lethargic                | 18               |      |      |       |      |      |      |      |      |      |      |
| Body weight (Compared to body weight before experiment) | Body weight:                                 |                  | 23   | 2    | 23,1g | 21,8 |      | 21,5 | 21,7 |      |      |      |
|                                                         | No loss                                      | 0                |      |      |       |      |      |      |      |      |      |      |
|                                                         | Loss < 5%                                    | 1                |      |      |       |      |      |      |      |      |      |      |
|                                                         | Loss 5-9 %                                   | 3                |      |      |       |      |      |      |      |      |      |      |
|                                                         | Loss 10-14%                                  | 5                |      |      |       |      |      |      |      |      |      |      |
|                                                         | Loss ≥ 15%                                   | 18               |      |      |       |      |      |      |      |      |      |      |
| Clinical signs (Infection, bleeding, discoloration)     | Normal                                       | 0                |      |      |       |      |      |      |      |      |      |      |
|                                                         | Minor irritation around surgical wound       | 1                |      |      |       |      |      |      |      |      |      |      |
|                                                         | Moderate irritation/infected surgical wound  | 3                |      |      |       |      |      |      |      |      |      |      |
|                                                         | Infected/open surgical wound                 | 4 *              |      |      |       |      |      |      |      |      |      |      |
|                                                         | Tumour > 1,0 cm in diameter                  | 10               |      |      |       |      |      |      |      |      |      |      |
|                                                         | Tumour > 1,5 cm in diameter                  | 18               |      |      |       |      |      |      |      |      |      |      |
|                                                         | Ulcerous tumour                              | 18               |      |      |       |      |      |      |      |      |      |      |
| Total:                                                  |                                              |                  |      |      |       |      |      |      |      |      |      |      |
| Comments, treatments etc:                               |                                              |                  |      |      |       |      |      |      |      |      |      |      |

0-3: Normal  
4-9: Pay attention to health state and consider treatment  
10-13: Pay close attention to health state, consider treatment or euthanasia  
14-18: Euthanasia \*Start treatment with antibiotics. If no effect within 3 days, euthanize the animal

Abscess mistaken for rapidly growing xenograft

Supplementary figure 1-27-6.  
Mouse and abscess growth curves

Weight curve

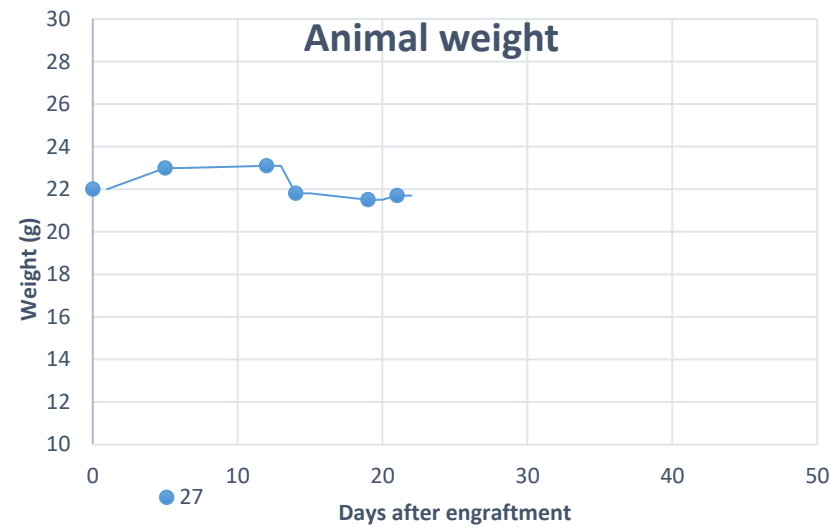

Size of abscess

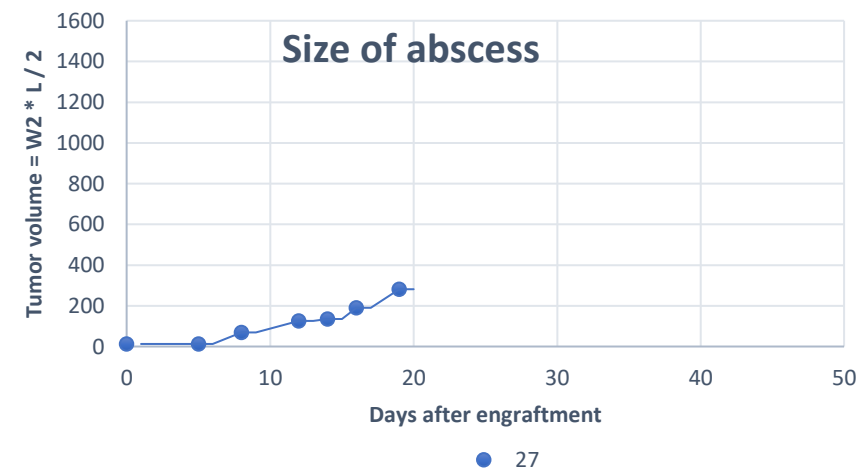



## Mouse 28

- Surgery date: 21.08.19
  - Age (weeks) 31
  - Weight (g) 22.6
  - Tumor fragment P18-1b
  - Fragment size 3 x 3 mm
  - Ear mark 2

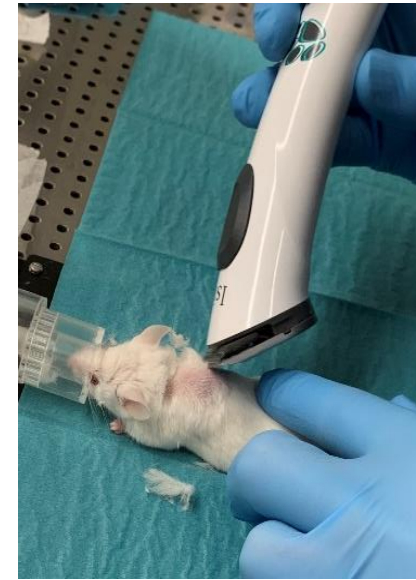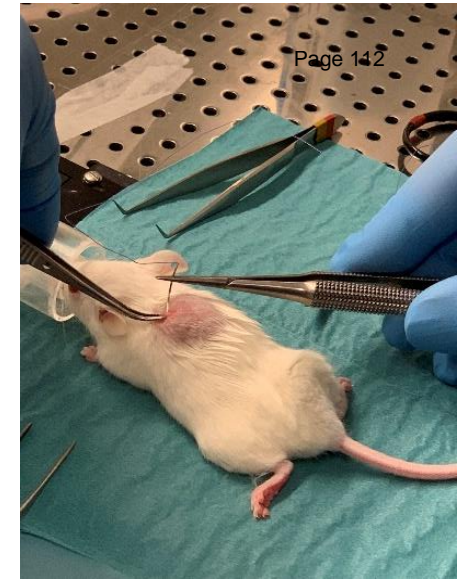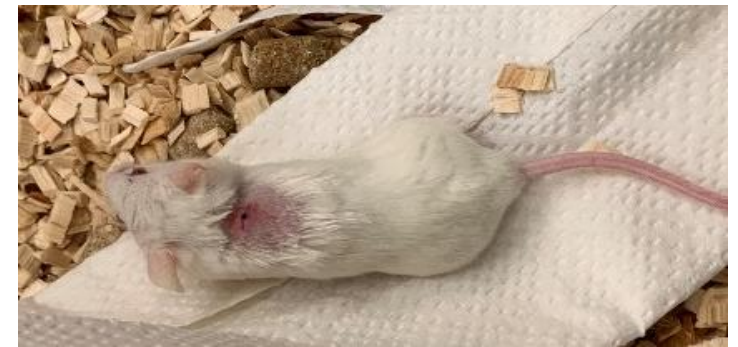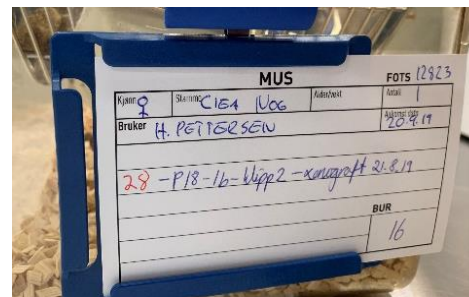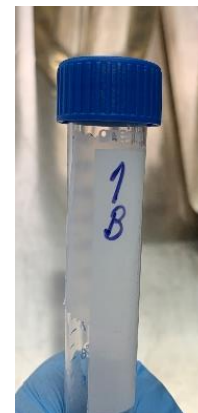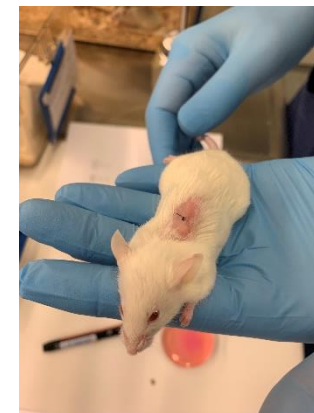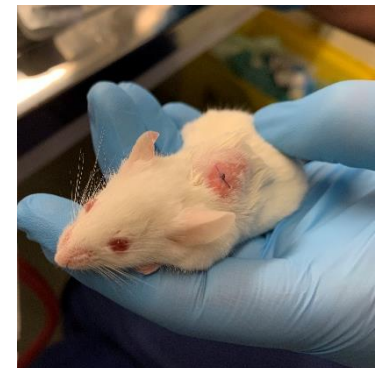

### Supplementary figure 1-28-1.

Pictures from the engraftment day

Supplementary figure 1-28-2. Pictures from follow up and xenograft size measurement

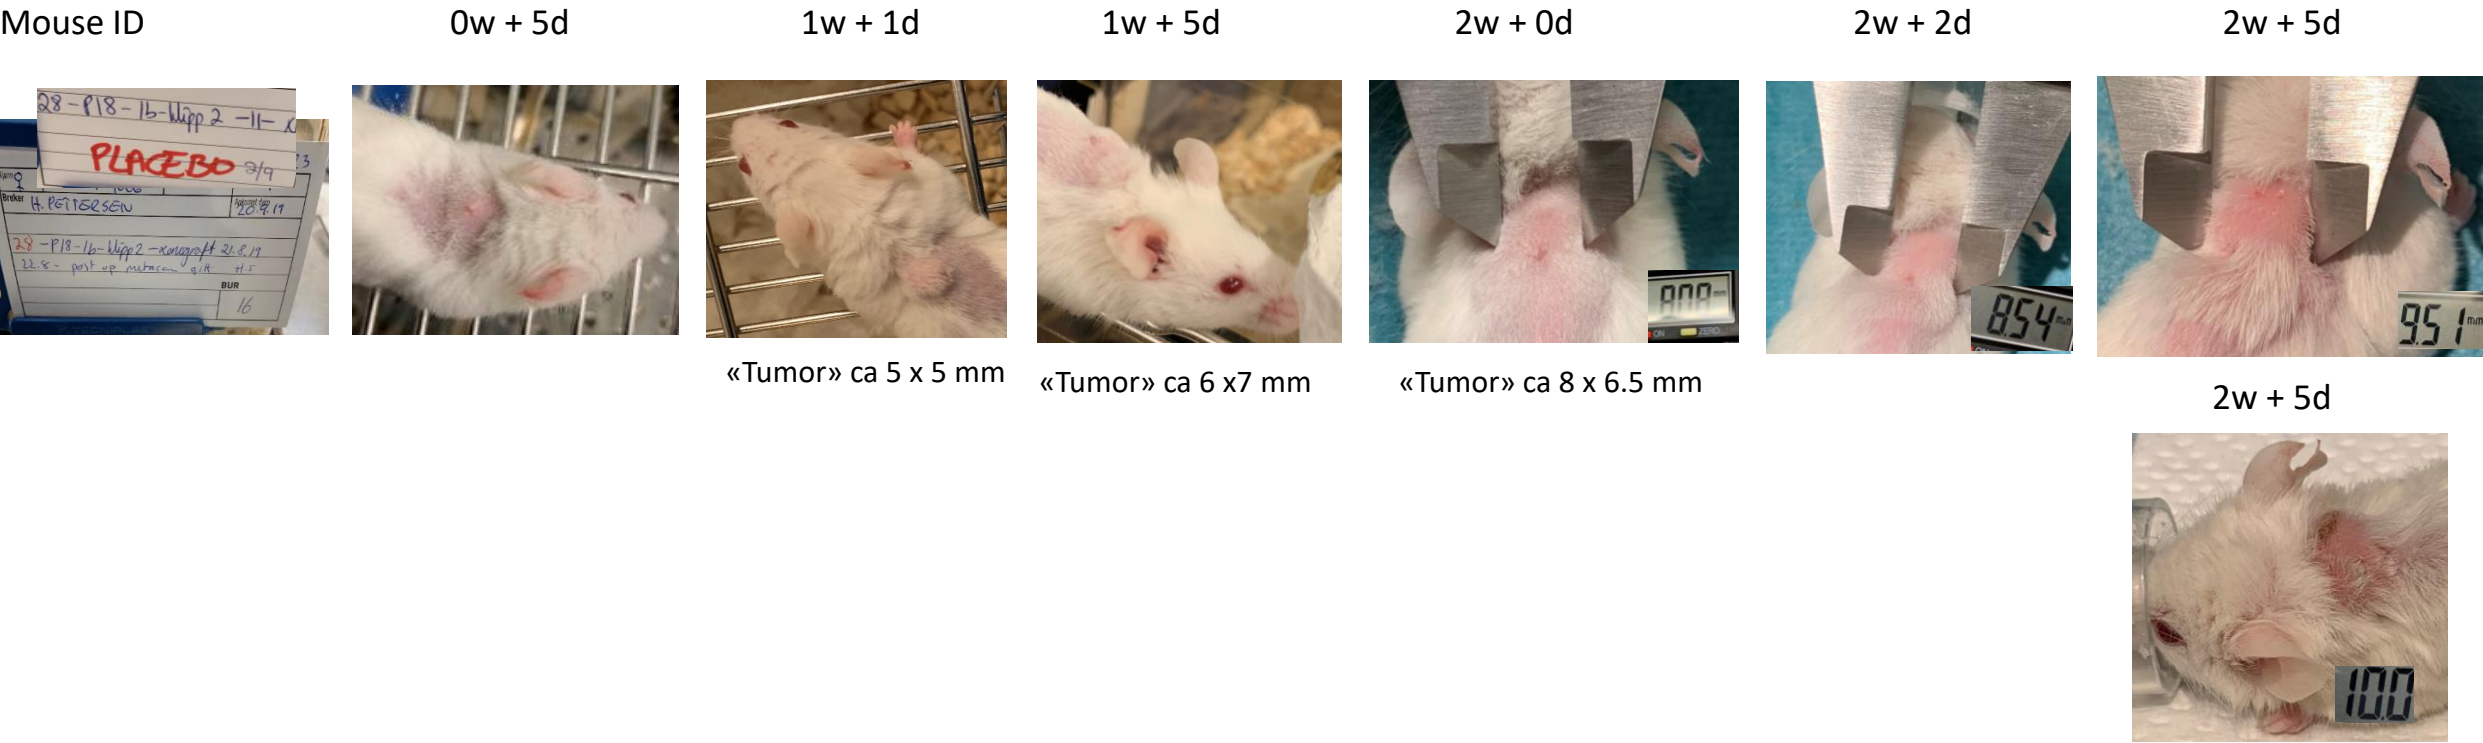



## Treatment:

- Placebo (Smartfish Remune with Rapseed oil)
- Blodsamples taken before and after treatment

~PLACEBO~

|            |                  |       |        |
|------------|------------------|-------|--------|
| 30.08.2019 |                  |       |        |
| 02.09.2019 | 145,1g           | 138,1 | 28     |
| 03.09.2019 | 141,5g           | 129,2 |        |
| 04.09.2019 | 145,9            | 134,9 |        |
| 05.09.2019 | 147,8            | 135,5 |        |
| 06.09.2019 | 142,2            | 128,5 |        |
| 09.09.2019 | <del>146,4</del> |       |        |
| 10.09.2019 | 146,4            | 132,3 |        |
| 11.09.2019 | 142,4            |       | active |
| 12.09.2019 |                  |       |        |
| 13.09.2019 |                  |       |        |

  

| MUS                                    |         | FOTS         |        |
|----------------------------------------|---------|--------------|--------|
| Kønn                                   | Stamme  | Alder/vekt   | Antall |
| ♀                                      | C10A MG |              | 1      |
| Bruker                                 |         | Ankomst dato |        |
|                                        |         | 20.1.19      |        |
| 28-P18-1b-klipp 2 -11- Kongsrødt 21818 |         |              |        |
| PLACEBO 2/9                            |         | BUR          |        |
|                                        |         | 16           |        |

**Supplementary figure 1-28-3.** List over weight registrations of the drinking bottle (with placebo) before and after provided to the mice

**Supplementary figure 1-28-4. Pictures from euthanization (11.09.19)**

- Not xenograft but an abscess growing
- Euthanized due to two other mice with bursting abscesses (mouse 27 and 29)

Mus ID

19 dager post op

21 dager/avliving

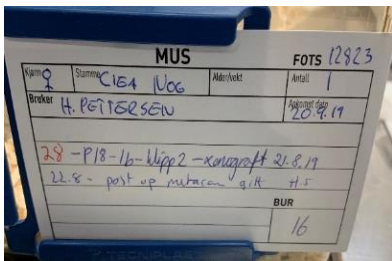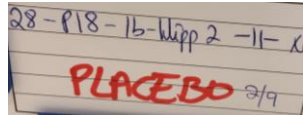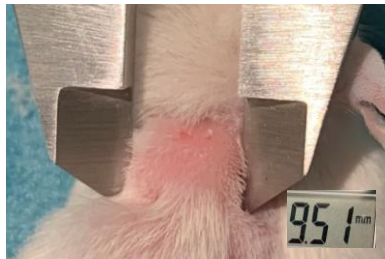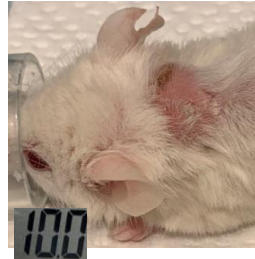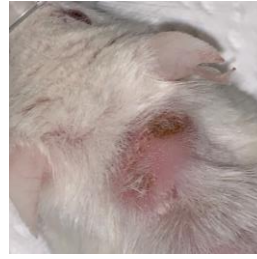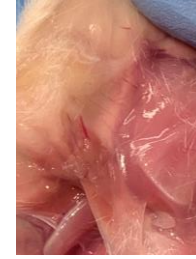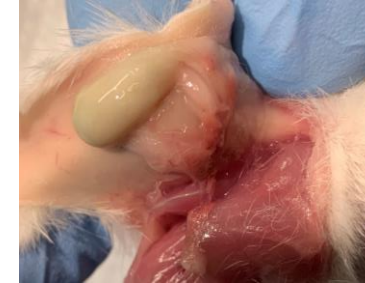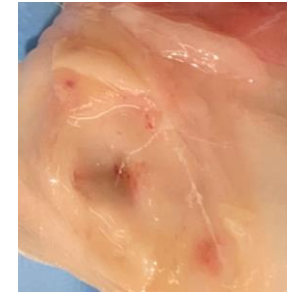

Brown fields/scurvy forming  
on the skin over the «tumor»  
(abscess)

Green abscess. Green liquid coming out when pinched. Clearly not the xenograft.

Almost no xenograft visible,  
nothing to sample

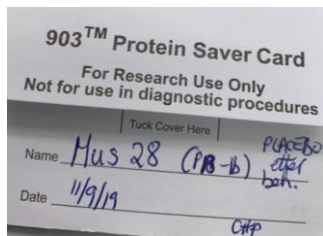



Supplementary figure 1-28-5. Score sheet

NTNU

Score sheet FOTS:  
Avdeling for komparativ medisin (AKM)

Responsible researcher:  
Petterson

Animal ID:  
(P18-16) 28 W181 2

| Parameter                                               | State                                        | Assessment scale | Date      | Date     | Date  | Date  | Date | Date | Date  | Date  | Date | Date |
|---------------------------------------------------------|----------------------------------------------|------------------|-----------|----------|-------|-------|------|------|-------|-------|------|------|
| General appearance                                      | Normal                                       | 0                | 2/8       | 26/8     | 29/8  | 2/9   | 4/9  | 6/9  | 9/9   | 11/9  |      |      |
|                                                         | Reduced grooming                             | 1                |           |          |       |       |      |      |       |       |      |      |
|                                                         | Minor distention of abdomen, rough hair coat | 3                |           |          |       |       |      |      |       |       |      |      |
|                                                         | Hunchback or distended abdomen, inactive     | 18               |           |          |       |       |      |      |       |       |      |      |
| Behaviour (Level of activity)                           | Normal                                       | 0                |           |          |       |       |      |      |       |       |      |      |
|                                                         | Slightly reduced                             | 1                |           |          |       |       |      |      |       |       |      |      |
|                                                         | Moderately reduced                           | 3                |           |          |       |       |      |      |       |       |      |      |
|                                                         | Distressed behaviour due to growing tumour   | 3                |           |          |       |       |      |      |       |       |      |      |
|                                                         | Obviously reduced                            | 5                |           |          |       |       |      |      |       |       |      |      |
|                                                         | Isolated, inactive, lethargic                | 18               |           |          |       |       |      |      |       |       |      |      |
| Body weight (Compared to body weight before experiment) | Body weight:                                 |                  |           | 23,2     | 23,7  | 23,4  | 23,0 |      | 23,5  | 22,9  |      |      |
|                                                         | No loss                                      | 0                |           |          |       |       |      |      |       |       |      |      |
|                                                         | Loss < 5%                                    | 1                |           |          |       |       |      |      |       |       |      |      |
|                                                         | Loss 5-9%                                    | 3                |           |          |       |       |      |      |       |       |      |      |
|                                                         | Loss 10-14%                                  | 5                |           |          |       |       |      |      |       |       |      |      |
|                                                         | Loss ≥ 15%                                   | 18               |           |          |       |       |      |      |       |       |      |      |
| Clinical signs (Infection, bleeding, discoloration)     | Normal                                       | 0                |           |          |       |       |      |      |       |       |      |      |
|                                                         | Minor irritation around surgical wound       | 1                | Swiff inn | Har fort | Ser   | Ser   |      |      | Start | start |      |      |
|                                                         | Moderate irritation/infected surgical wound  | 3                | 4x3x3     | 3x3x3    | 5x5x3 | 5x5x3 |      |      | 2x5   | 2x5   |      |      |
|                                                         | Infected/open surgical wound                 | 4*               | 0,5x1     | 0,5x1    | 0,5x1 | 0,5x1 |      |      | 7x5   | 7x5   |      |      |
|                                                         | Tumour > 1,0 cm in diameter                  | 10               | 5,3       | 5,3      | 5,3   | 5,3   |      |      | 10    | 10    |      |      |
|                                                         | Tumour > 1,5 cm in diameter                  | 18               |           |          |       |       |      |      |       |       |      |      |
|                                                         | Ulcerous tumour                              | 18               |           |          |       |       |      |      |       |       |      |      |
| Total:                                                  |                                              |                  |           |          |       |       |      |      |       |       |      |      |
| Comments, treatments etc:                               |                                              |                  |           |          |       |       |      |      |       |       |      |      |

0-3: Normal  
4-9: Pay attention to health state and consider treatment  
10-13: Pay close attention to health state, consider treatment or euthanasia  
14-18: Euthanasia \*Start treatment with antibiotics. If no effect within 3 days, euthanize the animal

Swiff inn  
Har fort  
Ser  
Ser  
Start  
start  
2x5  
2x5  
7x5  
7x5  
10  
10  
5,3  
5,3  
5,3  
5,3  
10  
10  
9,5  
7

Note: numbers represent abscess size, not tumor growth.

Supplementary figure 1-28-6.  
Mouse and abscess growth curve

Weight curve

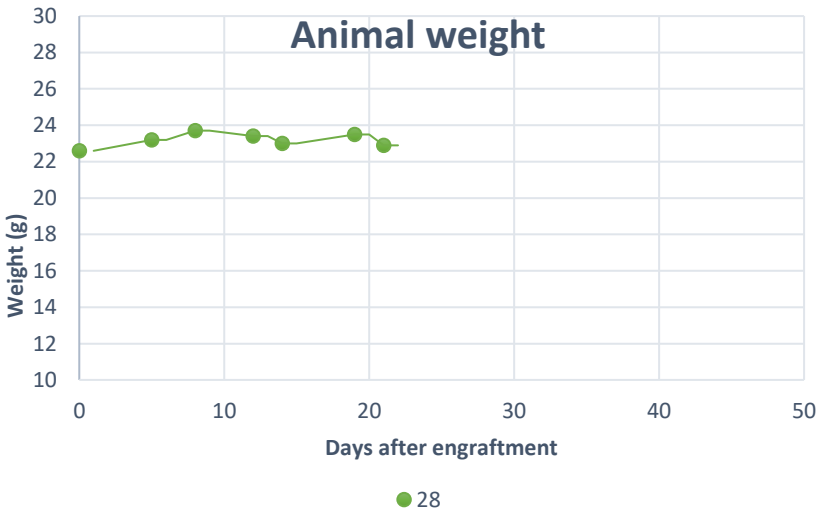

Size of abscess

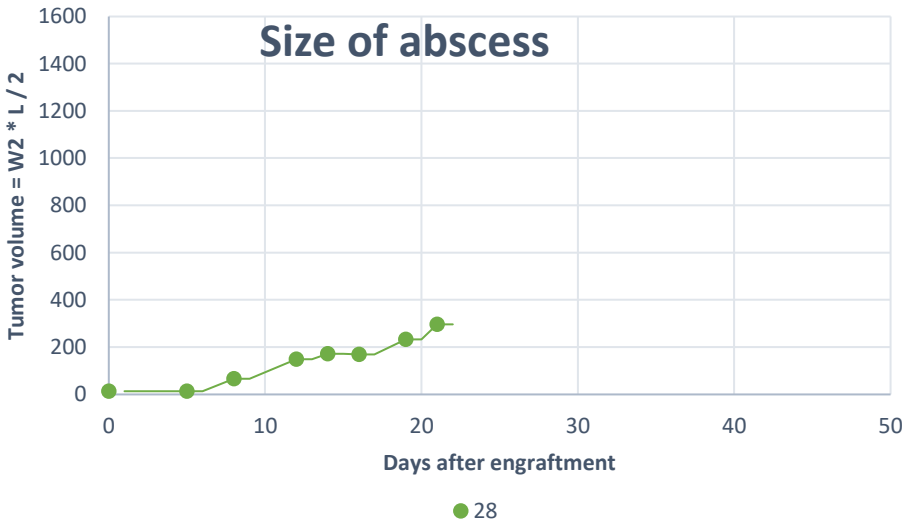



## Mouse 29

- Surgery date: 21.08.19
  - Age (weeks) 31
  - Weight (g) 22.82
  - Tumor fragment P18-2a
  - Fragment size 3 x 3 mm
  - Ear mark 3
  - One stitch was opened by the mouse after 1 hour. Restitched.

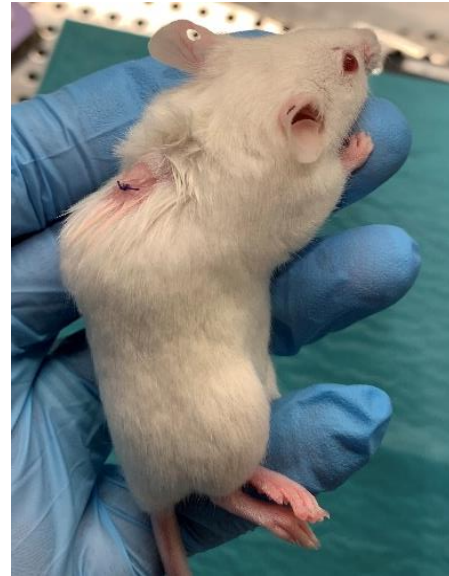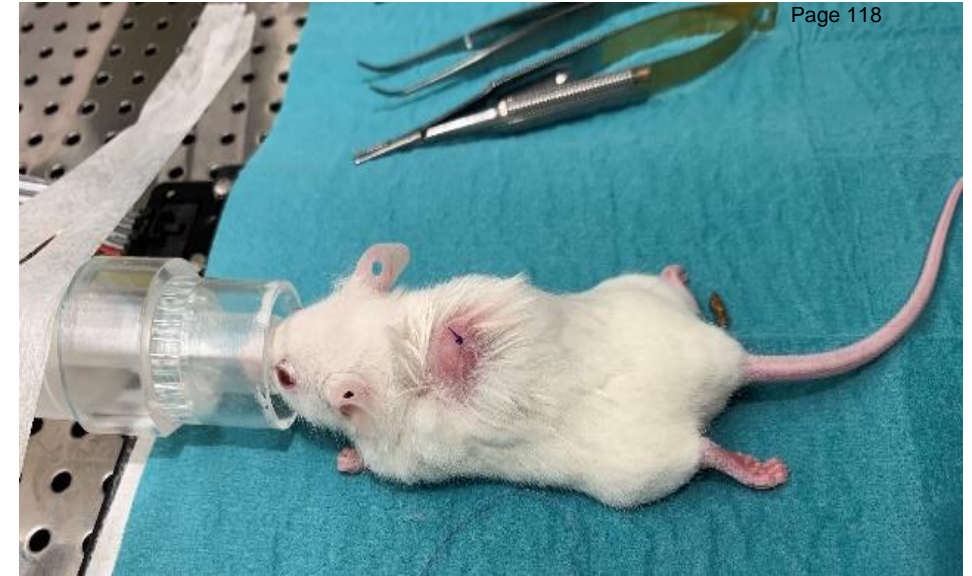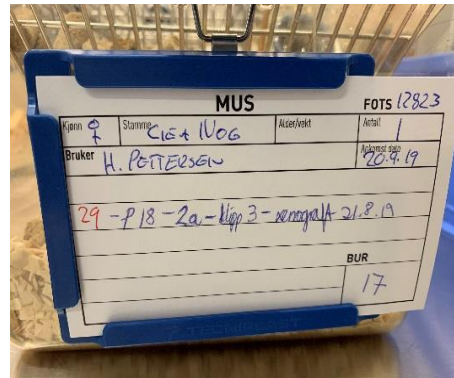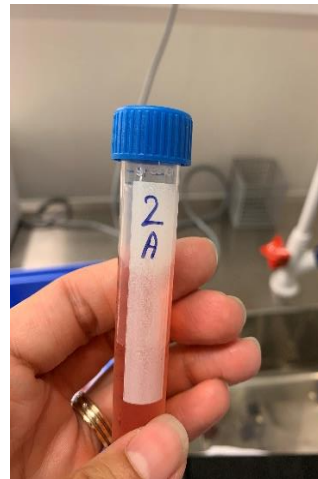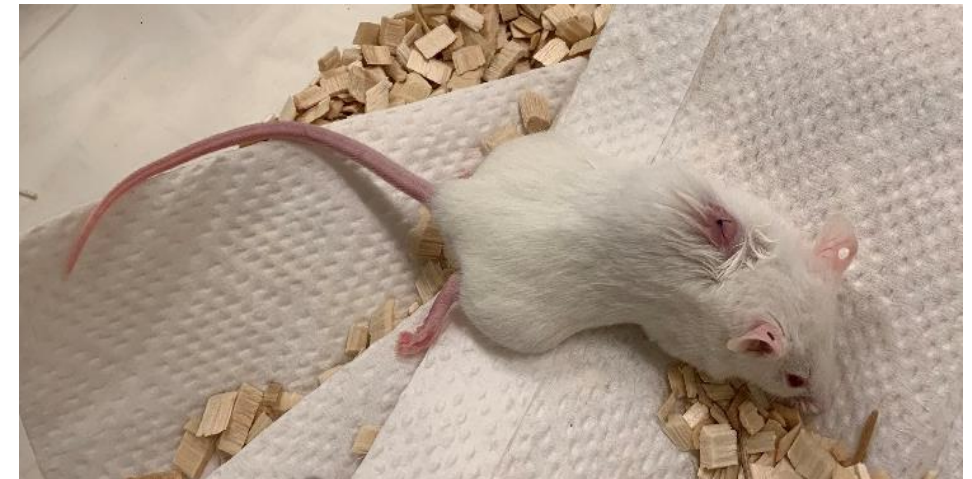

**Supplementary figure 1-29-1.** Pictures from the engraftment day

Pictures from follow up

| Mouse ID                                                                         | 0w + 5d                                                                           | 1w + 1d                                                                            | 1w + 5d                                                                             | 2w + 0d                                                                             | 2w + 2d                                                                             | 2w + 5d                                                                             |
|----------------------------------------------------------------------------------|-----------------------------------------------------------------------------------|------------------------------------------------------------------------------------|-------------------------------------------------------------------------------------|-------------------------------------------------------------------------------------|-------------------------------------------------------------------------------------|-------------------------------------------------------------------------------------|
| 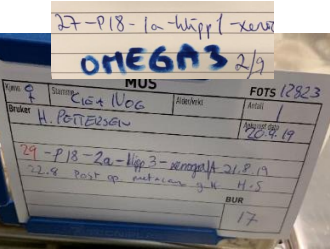 |  |  |  |  |  |  |
|                                                                                  |                                                                                   | «tumor» ca 5 x 5 mm                                                                | «Tumor» ca 5 x 5 mm                                                                 | «Tumor» ca 6 x 5,5 mm                                                               | «Tumor» ca 6 mm                                                                     | Wound with «crater»                                                                 |



Treatment:

- Smartfish Remune with fishoil
- Blodsamples before/after

| ~ OMEGA-3 ~ |                  |        |         |    |
|-------------|------------------|--------|---------|----|
| 02.09.2019  | 142,4g           | 131,3g | 278     |    |
| 03.09.2019  | 142,8g           | 131,8g |         |    |
| 04.09.2019  | 144,5            | 133,9g |         | 29 |
| 05.09.2019  | 141,2            | 128,3  |         |    |
| 06.09.2019  | 141,2            | vekt?  |         |    |
| 09.09.2019  | <del>141,2</del> |        |         |    |
| 10.09.2019  | 140,7            | 128,0  |         |    |
| 11.09.2019  | 141,4            |        | avlivet |    |
| 12.09.2019  |                  |        |         |    |

  

| MUS                             |                 |            | FOTS 12823           |
|---------------------------------|-----------------|------------|----------------------|
| Kjønn ♀                         | Stamme CIEA N03 | Alder/vekt | Antall 2             |
| Bruker Pettersen Caroline H     |                 |            | Ankomst dato 20.9.19 |
| 27-P18-1a-hipp(1)-x-ray 21.8.19 |                 |            |                      |
| 29-P18-2a-hipp(3)-x-ray 21.8.19 |                 |            |                      |
| OMEGA3 2/9                      |                 |            | BUR                  |
|                                 |                 |            | 15                   |

**Supplementary figure 1-29-3.** List over weight registrations of the drinking bottle (with Smartfish Remune Peach) before and after provided to the mice

## Supplementary figure 1-29-4. Pictures from euthanization (11.09.19)

- It was not the xenograft, but an abscess growing.  
Abscess bursted and left a wound in the xenograft aerea

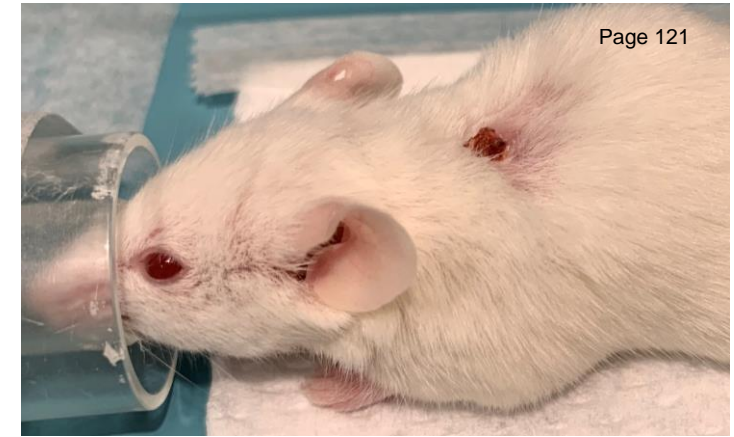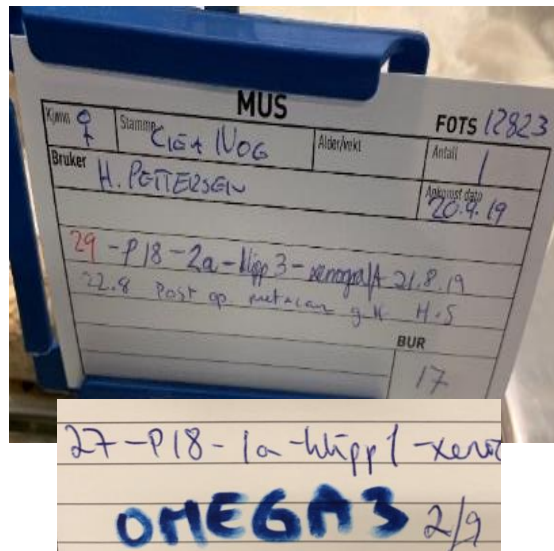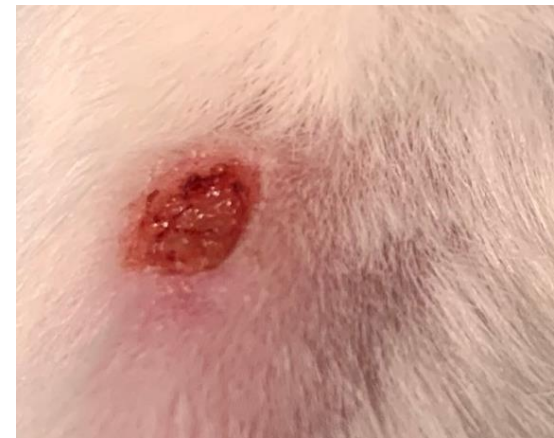

Wound with a «crater». The xenograft seems to be gone.

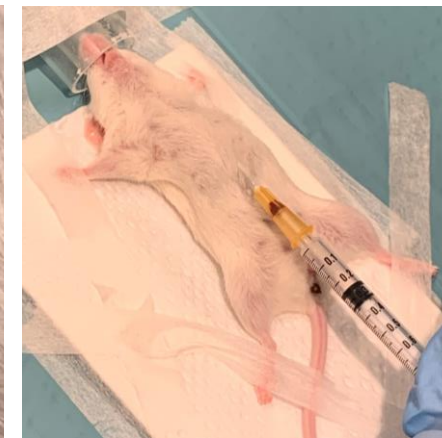

Blood drained from the heart before opening the chest and cutting the aorta. Gave a higher volume for the blood sample compared to sample from the back vein.

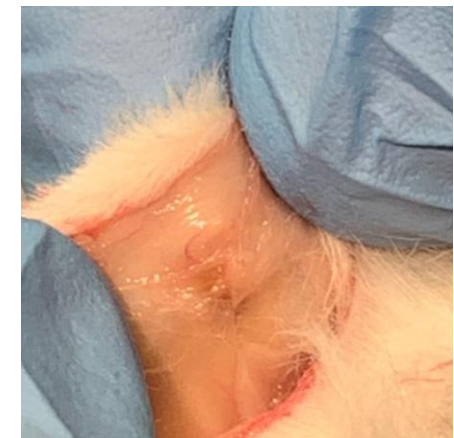

Only remainings of the xenograft was found.



## Page 122

### Abscess mistaken for rapidly growing xenograft

Supplementary figure 1-29-6.  
Mouse and abscess growth curves

Weight curve

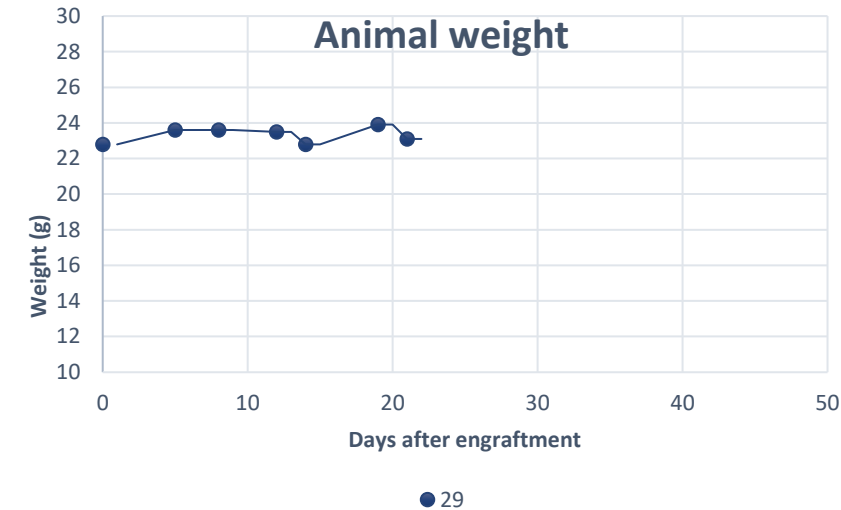

Size of abscess

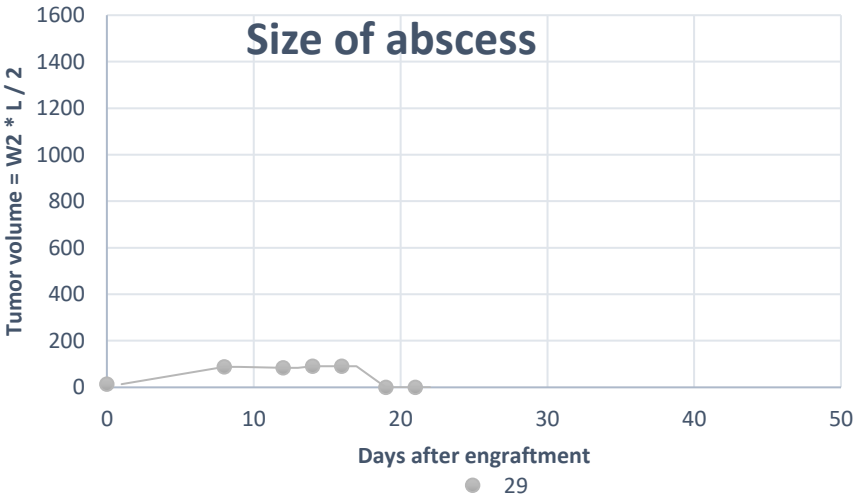



## Mouse 30

- Surgery date: 21.08.19
  - Age (weeks) 31
  - Weight (g) 22.1
  - Tumor fragment P18-2b
  - Fragment size 3 x 3 mm
  - Ear mark 4

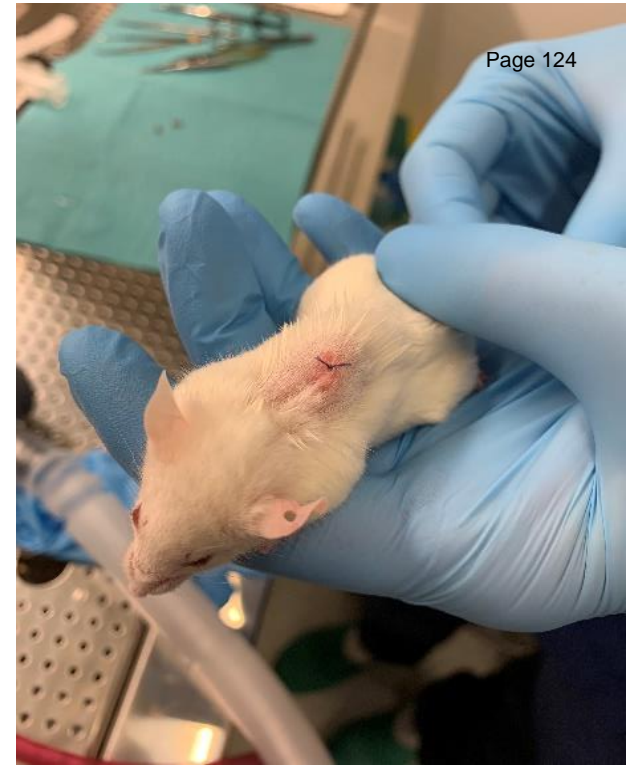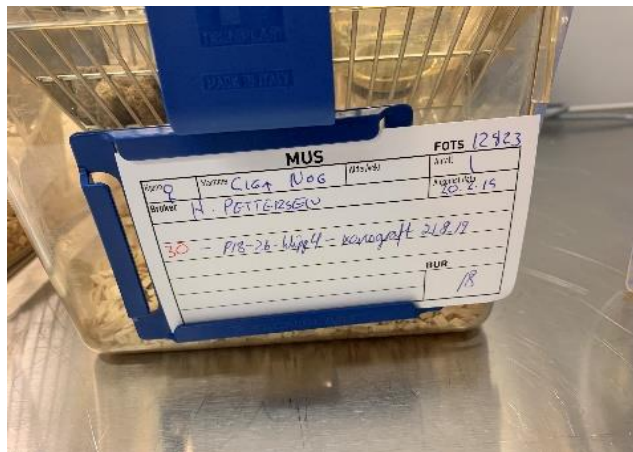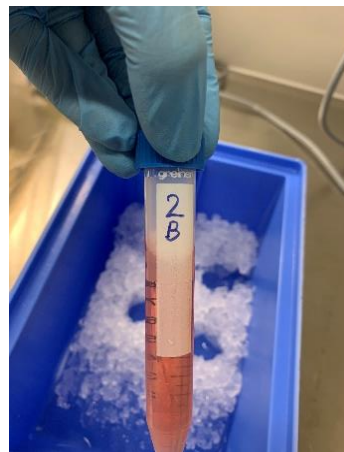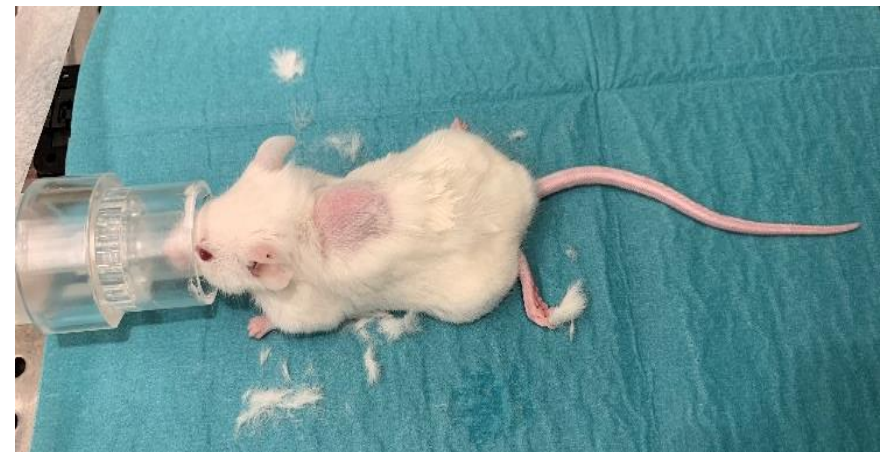

Supplementary figure 1-30-1. Pictures from the engraftment day

**Supplementary figure 1-30-2.** Pictures from follow up and xenograft size measurement

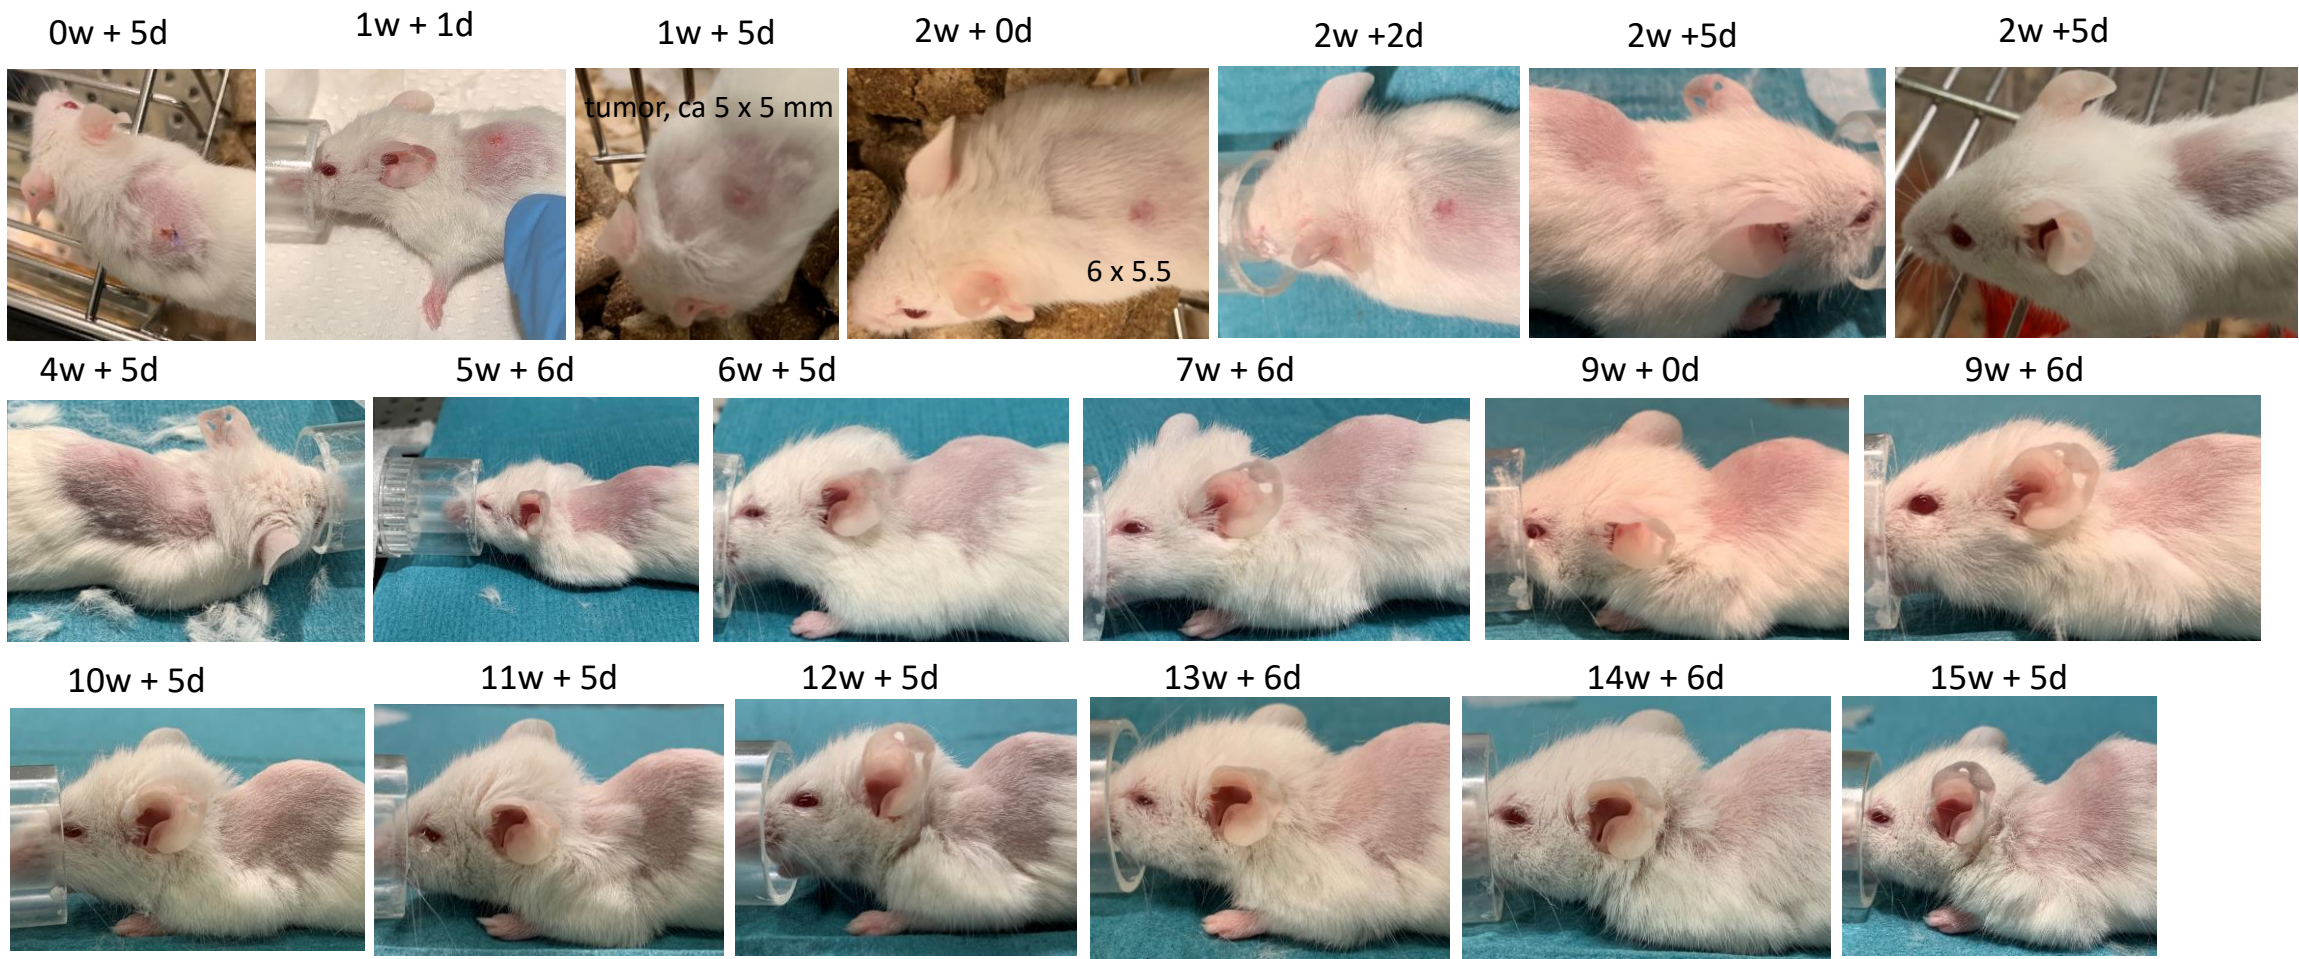



**Supplementary figure 1-30-2.** Pictures from follow up and xenograft size measurement

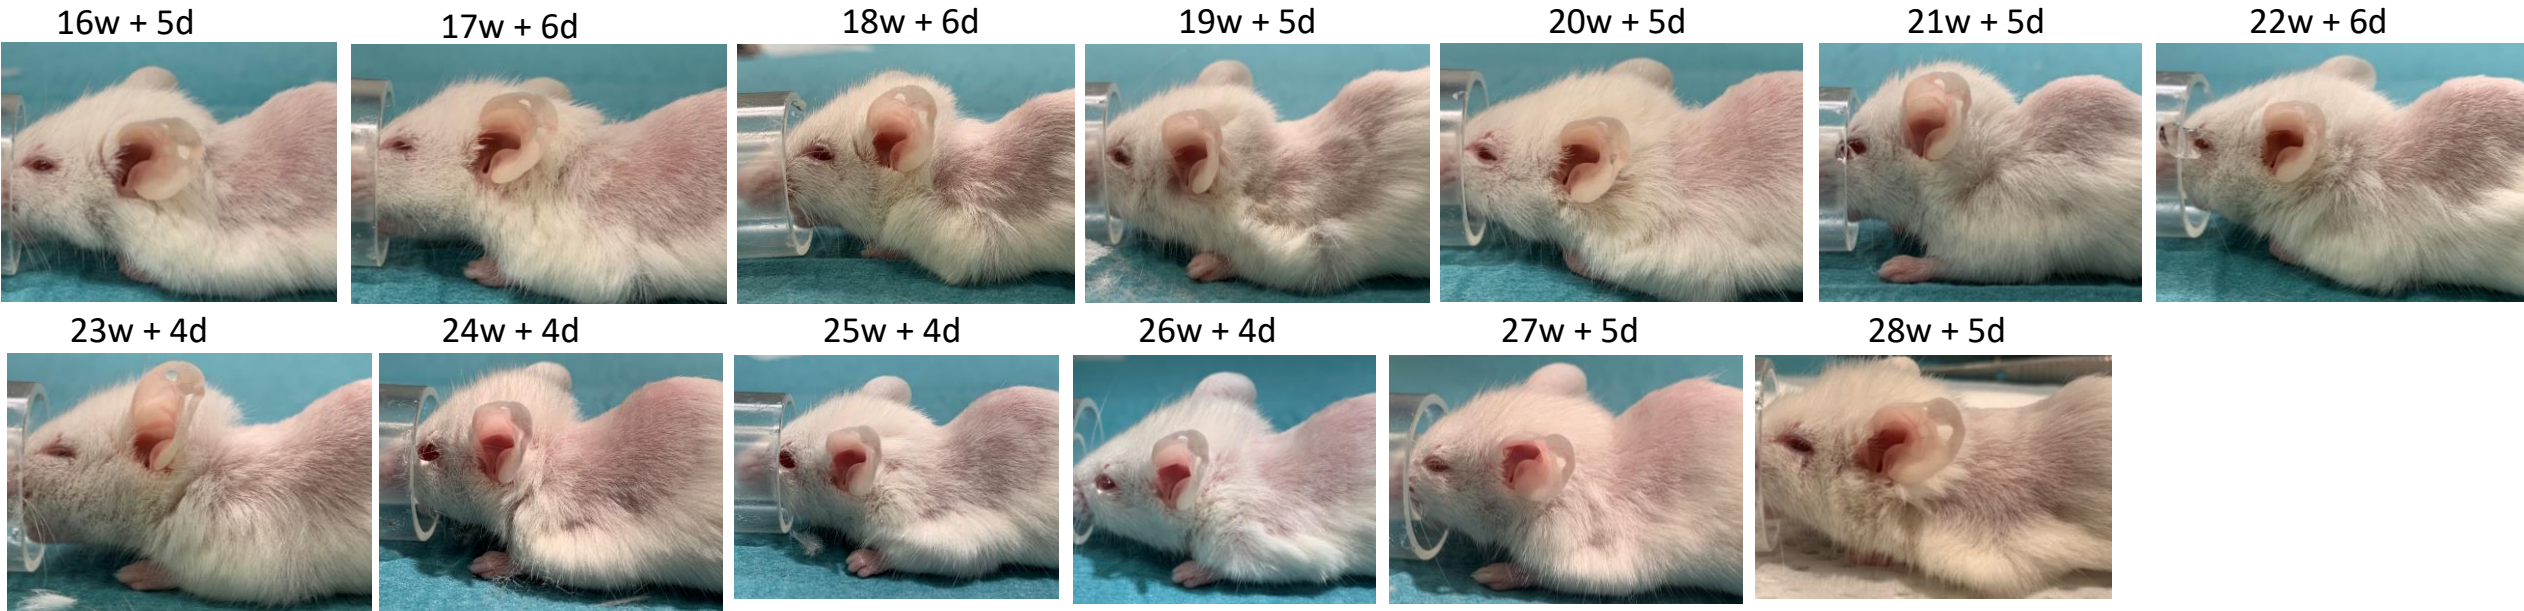



Supplementary figure 1-30-3. Pictures from euthanization (11.03.20)

- Xenograft size – not visible
- No treatment given
- Small/normal spleen
- Possibly small tumor on liver
- Euthanized due to xenograft not growing after 6 months

903™ Protein Saver Card  
For Research Use Only  
Not for use in diagnostic procedures

Tuck Cover Here

Name Mus 30 (P18-2b) Hipp 4  
Date 11.03.20

DMGAS3 CAP

Autopsy card modified from:  
[http://www.pathbase.net/Necropsy\\_of\\_the\\_Mouse/](http://www.pathbase.net/Necropsy_of_the_Mouse/)

| NUMBER               | Male       | Female          | STRAIN                     | BIRTH DATE         | EXPERIMENT            |
|----------------------|------------|-----------------|----------------------------|--------------------|-----------------------|
| 30 - (P18-2b) Hipp 4 |            |                 | CIEA MGS                   |                    | PDX - Xenograft 218 B |
| AGE AT DEATH         | DEATH MODE | DATE            | CLINICAL SYMPTOMS AT DEATH | GROUP              |                       |
|                      |            | 11.03.20        |                            | Petersen, Carline  |                       |
| ORGAN WEIGHT         |            | SECTION TAKEN   |                            |                    |                       |
| ORGAN                | WEIGHT     | ORGAN           | YES                        | GROSS OBSERVATION  |                       |
| Femur                |            | 1) Lung + Heart | X                          | OK                 |                       |
| Liver                |            | 2) Liver        | X                          | Fibula i liver     |                       |
| Spleen               |            | 3) Kidney       | X                          |                    |                       |
|                      |            | 4) Adrenal      |                            |                    |                       |
|                      |            | 5) Testis/Ovary |                            |                    |                       |
|                      |            | 6) Spleen       | X                          | size? < 1cm spleen |                       |
| Kidney               |            | 7) Lymph nodes  |                            |                    |                       |
|                      |            | 8) Bone marrow  |                            |                    |                       |
|                      |            | 9) Xenograft    | X                          | visible?           |                       |

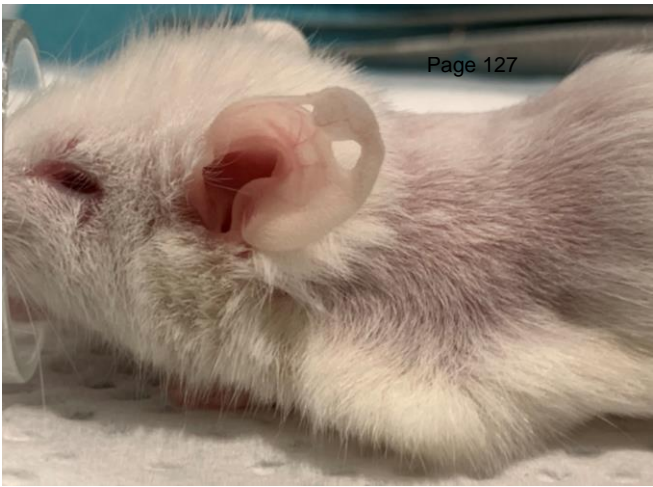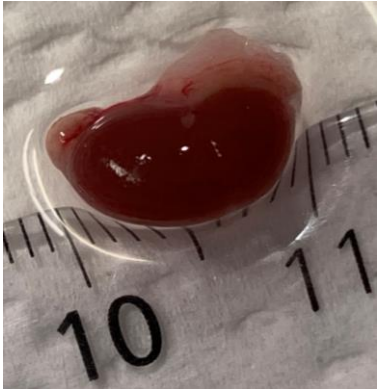

Normal kidney

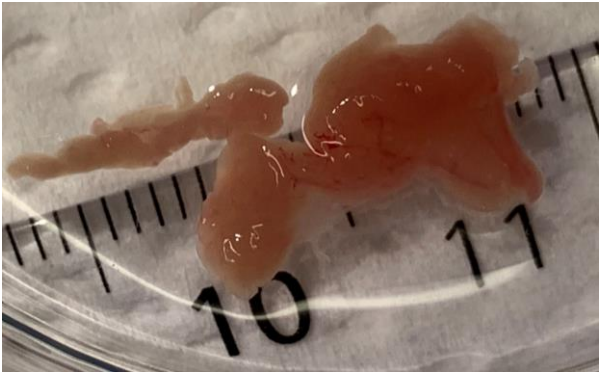

Pancreas

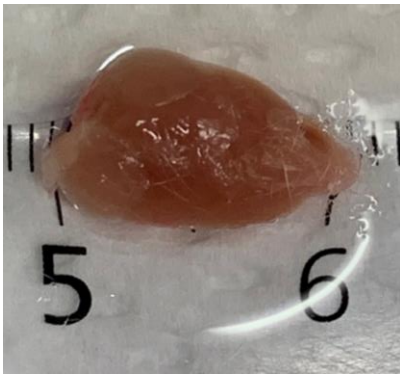

Thymus

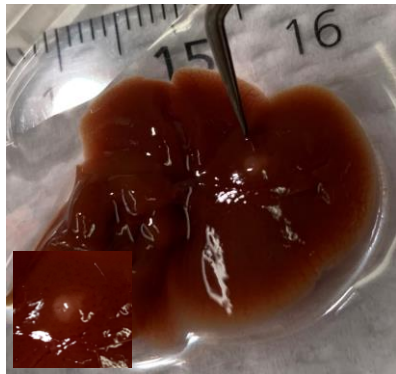

Liver with «bump» (tumor?) Only a small «bump» of xenograft

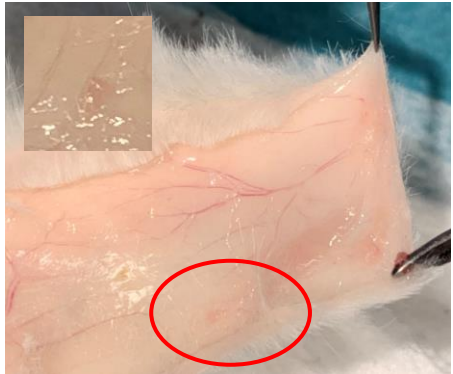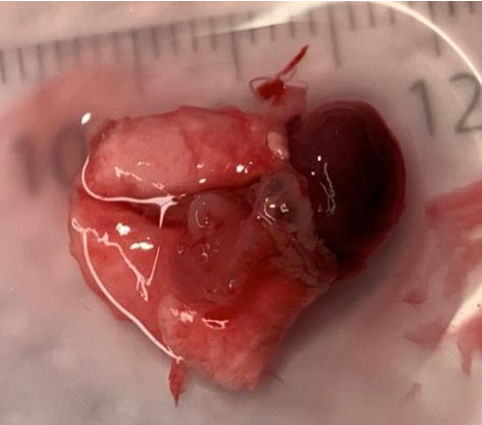

Normal heart and lungs

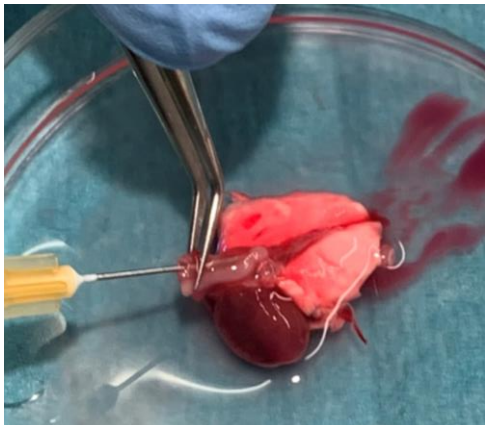

Lungs filled with formalin

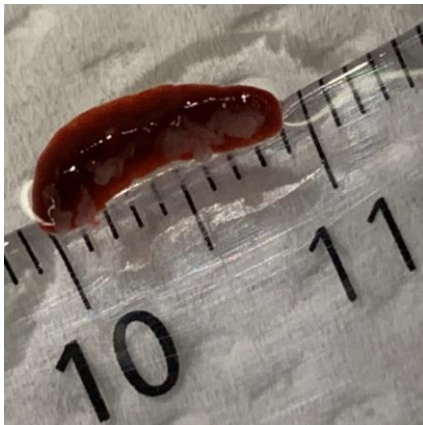

Normal spleen

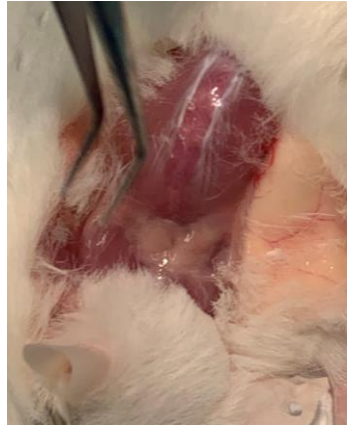

No tumors on shoulders

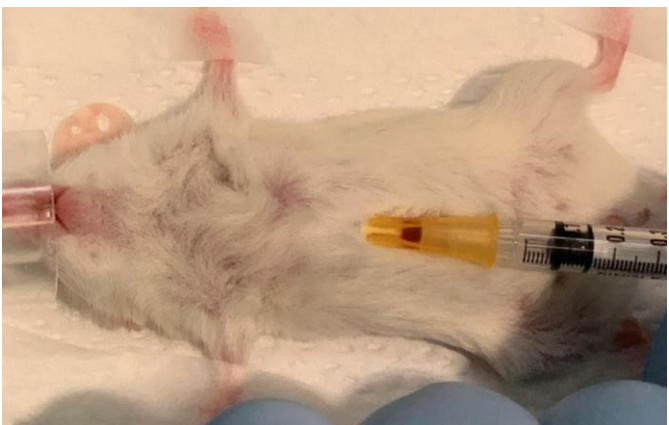

Blood sampling



Supplementary figure 1-30-4. Score sheets

NTNU Score sheet FOTS: Avdeling for komparativ medisin (AKM) Responsible researcher: Petterson Animal ID: (P18-26) 30 Wipf 4

| Parameter                                               | State                                        | Assessment scale | Date | Date | Date | Date | Date | Date | Date | Date | Date | Date | Date |
|---------------------------------------------------------|----------------------------------------------|------------------|------|------|------|------|------|------|------|------|------|------|------|
| General appearance                                      | Normal                                       | 0                | 21/8 | 26/8 | 27/8 | 2/9  | 4/9  | 6/9  | 9/9  | 11/9 | 13/9 | 16/9 | 19/9 |
|                                                         | Reduced grooming                             | 1                |      |      |      |      |      |      |      |      |      |      |      |
|                                                         | Minor distention of abdomen, rough hair coat | 3                |      |      |      |      |      |      |      |      |      |      |      |
|                                                         | Hunchback or distended abdomen, inactive     | 18               |      |      |      |      |      |      |      |      |      |      |      |
| Behaviour (Level of activity)                           | Normal                                       | 0                |      |      |      |      |      |      |      |      |      |      |      |
|                                                         | Slightly reduced                             | 1                |      |      |      |      |      |      |      |      |      |      |      |
|                                                         | Moderately reduced                           | 3                |      |      |      |      |      |      |      |      |      |      |      |
|                                                         | Distressed behaviour due to growing tumour   | 3                |      |      |      |      |      |      |      |      |      |      |      |
|                                                         | Obviously reduced                            | 5                |      |      |      |      |      |      |      |      |      |      |      |
|                                                         | Isolated, inactive, lethargic                | 18               |      |      |      |      |      |      |      |      |      |      |      |
| Body weight (Compared to body weight before experiment) | Body weight:                                 |                  | 23,4 | 23,3 | 23   | 23,1 |      | 24,5 | 23,9 | 23,3 | 22,8 | 23,5 |      |
|                                                         | No loss                                      | 0                |      |      |      |      |      |      |      |      |      |      |      |
|                                                         | Loss < 5%                                    | 1                |      |      |      |      |      |      |      |      |      |      |      |
|                                                         | Loss 5-9%                                    | 3                |      |      |      |      |      |      |      |      |      |      |      |
|                                                         | Loss 10-14%                                  | 5                |      |      |      |      |      |      |      |      |      |      |      |
|                                                         | Loss > 15%                                   | 18               |      |      |      |      |      |      |      |      |      |      |      |
| Clinical signs (Infection, bleeding, discoloration)     | Normal                                       | 0                |      |      |      |      |      |      |      |      |      |      |      |
|                                                         | Minor irritation around surgical wound       | 1                |      |      |      |      |      |      |      |      |      |      |      |
|                                                         | Moderate irritation/infected surgical wound  | 3                |      |      |      |      |      |      |      |      |      |      |      |
|                                                         | Infected/open surgical wound                 | 4*               |      |      |      |      |      |      |      |      |      |      |      |
|                                                         | Tumour > 1,0 cm in diameter                  | 10               |      |      |      |      |      |      |      |      |      |      |      |
|                                                         | Tumour > 1,5 cm in diameter                  | 18               |      |      |      |      |      |      |      |      |      |      |      |
|                                                         | Ulcerous tumour                              | 18               |      |      |      |      |      |      |      |      |      |      |      |
| Total:                                                  |                                              |                  |      |      |      |      |      |      |      |      |      |      |      |
| Comments, treatments etc:                               |                                              |                  |      |      |      |      |      |      |      |      |      |      |      |

0-3: Normal  
4-9: Pay attention to health state and consider treatment  
10-13: Pay close attention to health state, consider treatment or euthanasia  
14-18: Euthanasia \*Start treatment with antibiotics. If no effect within 3 days, euthanize the animal

20/9  
23,8  
Wipf Xuro

NTNU Score sheet FOTS: Avdeling for komparativ medisin (AKM) Responsible researcher: Petterson Animal ID: (P18-26) 30 Wipf 4

| Parameter                                               | State                                        | Assessment scale | Date | Date | Date | Date | Date | Date | Date | Date  | Date  | Date  | Date |
|---------------------------------------------------------|----------------------------------------------|------------------|------|------|------|------|------|------|------|-------|-------|-------|------|
| General appearance                                      | Normal                                       | 0                | 20/9 | 23/9 | 25/9 | 30/9 | 2/10 | 4/10 | 8/10 | 11/10 | 14/10 | 18/10 |      |
|                                                         | Reduced grooming                             | 1                |      |      |      |      |      |      |      |       |       |       |      |
|                                                         | Minor distention of abdomen, rough hair coat | 3                |      |      |      |      |      |      |      |       |       |       |      |
|                                                         | Hunchback or distended abdomen, inactive     | 18               |      |      |      |      |      |      |      |       |       |       |      |
| Behaviour (Level of activity)                           | Normal                                       | 0                |      |      |      |      |      |      |      |       |       |       |      |
|                                                         | Slightly reduced                             | 1                |      |      |      |      |      |      |      |       |       |       |      |
|                                                         | Moderately reduced                           | 3                |      |      |      |      |      |      |      |       |       |       |      |
|                                                         | Distressed behaviour due to growing tumour   | 3                |      |      |      |      |      |      |      |       |       |       |      |
|                                                         | Obviously reduced                            | 5                |      |      |      |      |      |      |      |       |       |       |      |
|                                                         | Isolated, inactive, lethargic                | 18               |      |      |      |      |      |      |      |       |       |       |      |
| Body weight (Compared to body weight before experiment) | Body weight:                                 |                  | 23,8 | 23,9 | 22,3 | 22,6 | 23,7 | 23,5 | 23,9 | 22,4  | 22,7  | 23,3  |      |
|                                                         | No loss                                      | 0                |      |      |      |      |      |      |      |       |       |       |      |
|                                                         | Loss < 5%                                    | 1                |      |      |      |      |      |      |      |       |       |       |      |
|                                                         | Loss 5-9%                                    | 3                |      |      |      |      |      |      |      |       |       |       |      |
|                                                         | Loss 10-14%                                  | 5                |      |      |      |      |      |      |      |       |       |       |      |
|                                                         | Loss > 15%                                   | 18               |      |      |      |      |      |      |      |       |       |       |      |
| Clinical signs (Infection, bleeding, discoloration)     | Normal                                       | 0                |      |      |      |      |      |      |      |       |       |       |      |
|                                                         | Minor irritation around surgical wound       | 1                |      |      |      |      |      |      |      |       |       |       |      |
|                                                         | Moderate irritation/infected surgical wound  | 3                |      |      |      |      |      |      |      |       |       |       |      |
|                                                         | Infected/open surgical wound                 | 4*               |      |      |      |      |      |      |      |       |       |       |      |
|                                                         | Tumour > 1,0 cm in diameter                  | 10               |      |      |      |      |      |      |      |       |       |       |      |
|                                                         | Tumour > 1,5 cm in diameter                  | 18               |      |      |      |      |      |      |      |       |       |       |      |
|                                                         | Ulcerous tumour                              | 18               |      |      |      |      |      |      |      |       |       |       |      |
| Total:                                                  |                                              |                  |      |      |      |      |      |      |      |       |       |       |      |
| Comments, treatments etc:                               |                                              |                  |      |      |      |      |      |      |      |       |       |       |      |

0-3: Normal  
4-9: Pay attention to health state and consider treatment  
10-13: Pay close attention to health state, consider treatment or euthanasia  
14-18: Euthanasia \*Start treatment with antibiotics. If no effect within 3 days, euthanize the animal

NTNU Score sheet FOTS: Avdeling for komparativ medisin (AKM) Responsible researcher: Petterson Animal ID: (P18-26) 30 Wipf 4

| Parameter                                               | State                                        | Assessment scale | Date  | Date  | Date  | Date  | Date  | Date  | Date | Date | Date | Date  | Date  |
|---------------------------------------------------------|----------------------------------------------|------------------|-------|-------|-------|-------|-------|-------|------|------|------|-------|-------|
| General appearance                                      | Normal                                       | 0                | 16/10 | 18/10 | 21/10 | 23/10 | 23/10 | 26/10 | 1/11 | 4/11 | 6/11 | 13/11 | 13/11 |
|                                                         | Reduced grooming                             | 1                |       |       |       |       |       |       |      |      |      |       |       |
|                                                         | Minor distention of abdomen, rough hair coat | 3                |       |       |       |       |       |       |      |      |      |       |       |
|                                                         | Hunchback or distended abdomen, inactive     | 18               |       |       |       |       |       |       |      |      |      |       |       |
| Behaviour (Level of activity)                           | Normal                                       | 0                |       |       |       |       |       |       |      |      |      |       |       |
|                                                         | Slightly reduced                             | 1                |       |       |       |       |       |       |      |      |      |       |       |
|                                                         | Moderately reduced                           | 3                |       |       |       |       |       |       |      |      |      |       |       |
|                                                         | Distressed behaviour due to growing tumour   | 3                |       |       |       |       |       |       |      |      |      |       |       |
|                                                         | Obviously reduced                            | 5                |       |       |       |       |       |       |      |      |      |       |       |
|                                                         | Isolated, inactive, lethargic                | 18               |       |       |       |       |       |       |      |      |      |       |       |
| Body weight (Compared to body weight before experiment) | Body weight:                                 |                  | 23,3  | 23,5  | 23,9  | 22,7  | 22,5  | 22,5  | 22   | 23,1 | 24,0 | 22,5  |       |
|                                                         | No loss                                      | 0                |       |       |       |       |       |       |      |      |      |       |       |
|                                                         | Loss < 5%                                    | 1                |       |       |       |       |       |       |      |      |      |       |       |
|                                                         | Loss 5-9%                                    | 3                |       |       |       |       |       |       |      |      |      |       |       |
|                                                         | Loss 10-14%                                  | 5                |       |       |       |       |       |       |      |      |      |       |       |
|                                                         | Loss > 15%                                   | 18               |       |       |       |       |       |       |      |      |      |       |       |
| Clinical signs (Infection, bleeding, discoloration)     | Normal                                       | 0                |       |       |       |       |       |       |      |      |      |       |       |
|                                                         | Minor irritation around surgical wound       | 1                |       |       |       |       |       |       |      |      |      |       |       |
|                                                         | Moderate irritation/infected surgical wound  | 3                |       |       |       |       |       |       |      |      |      |       |       |
|                                                         | Infected/open surgical wound                 | 4*               |       |       |       |       |       |       |      |      |      |       |       |
|                                                         | Tumour > 1,0 cm in diameter                  | 10               |       |       |       |       |       |       |      |      |      |       |       |
|                                                         | Tumour > 1,5 cm in diameter                  | 18               |       |       |       |       |       |       |      |      |      |       |       |
|                                                         | Ulcerous tumour                              | 18               |       |       |       |       |       |       |      |      |      |       |       |
| Total:                                                  |                                              |                  |       |       |       |       |       |       |      |      |      |       |       |
| Comments, treatments etc:                               |                                              |                  |       |       |       |       |       |       |      |      |      |       |       |

0-3: Normal  
4-9: Pay attention to health state and consider treatment  
10-13: Pay close attention to health state, consider treatment or euthanasia  
14-18: Euthanasia \*Start treatment with antibiotics. If no effect within 3 days, euthanize the animal

NTNU Score sheet FOTS: Avdeling for komparativ medisin (AKM) Responsible researcher: Petterson Animal ID: (P18-26) 30 Wipf 4

| Parameter                                               | State                                        | Assessment scale | Date  | Date  | Date  | Date  | Date  | Date | Date | Date | Date  | Date  | Date  |
|---------------------------------------------------------|----------------------------------------------|------------------|-------|-------|-------|-------|-------|------|------|------|-------|-------|-------|
| General appearance                                      | Normal                                       | 0                | 15/11 | 18/11 | 20/11 | 25/11 | 27/11 | 2/12 | 5/12 | 9/12 | 11/12 | 13/12 | 14/12 |
|                                                         | Reduced grooming                             | 1                |       |       |       |       |       |      |      |      |       |       |       |
|                                                         | Minor distention of abdomen, rough hair coat | 3                |       |       |       |       |       |      |      |      |       |       |       |
|                                                         | Hunchback or distended abdomen, inactive     | 18               |       |       |       |       |       |      |      |      |       |       |       |
| Behaviour (Level of activity)                           | Normal                                       | 0                |       |       |       |       |       |      |      |      |       |       |       |
|                                                         | Slightly reduced                             | 1                |       |       |       |       |       |      |      |      |       |       |       |
|                                                         | Moderately reduced                           | 3                |       |       |       |       |       |      |      |      |       |       |       |
|                                                         | Distressed behaviour due to growing tumour   | 3                |       |       |       |       |       |      |      |      |       |       |       |
|                                                         | Obviously reduced                            | 5                |       |       |       |       |       |      |      |      |       |       |       |
|                                                         | Isolated, inactive, lethargic                | 18               |       |       |       |       |       |      |      |      |       |       |       |
| Body weight (Compared to body weight before experiment) | Body weight:                                 |                  | 22,5  | 22,9  | 23,4  | 24,0  | 23,9  | 22,8 | 22,3 | 23,2 | 22,5  | 22,3  | 22,9  |
|                                                         | No loss                                      | 0                |       |       |       |       |       |      |      |      |       |       |       |
|                                                         | Loss < 5%                                    | 1                |       |       |       |       |       |      |      |      |       |       |       |
|                                                         | Loss 5-9%                                    | 3                |       |       |       |       |       |      |      |      |       |       |       |
|                                                         | Loss 10-14%                                  | 5                |       |       |       |       |       |      |      |      |       |       |       |
|                                                         | Loss > 15%                                   | 18               |       |       |       |       |       |      |      |      |       |       |       |
| Clinical signs (Infection, bleeding, discoloration)     | Normal                                       | 0                |       |       |       |       |       |      |      |      |       |       |       |
|                                                         | Minor irritation around surgical wound       | 1                |       |       |       |       |       |      |      |      |       |       |       |
|                                                         | Moderate irritation/infected surgical wound  | 3                |       |       |       |       |       |      |      |      |       |       |       |
|                                                         | Infected/open surgical wound                 | 4*               |       |       |       |       |       |      |      |      |       |       |       |
|                                                         | Tumour > 1,0 cm in diameter                  | 10               |       |       |       |       |       |      |      |      |       |       |       |
|                                                         | Tumour > 1,5 cm in diameter                  | 18               |       |       |       |       |       |      |      |      |       |       |       |
|                                                         | Ulcerous tumour                              | 18               |       |       |       |       |       |      |      |      |       |       |       |
| Total:                                                  |                                              |                  |       |       |       |       |       |      |      |      |       |       |       |
| Comments, treatments etc:                               |                                              |                  |       |       |       |       |       |      |      |      |       |       |       |

0-3: Normal  
4-9: Pay attention to health state and consider treatment  
10-13: Pay close attention to health state, consider treatment or euthanasia  
14-18: Euthanasia \*Start treatment with antibiotics. If no effect within 3 days, euthanize the animal

Supplementary figure 1-30-4. Score sheets

NTNU

Score sheet FOTS:  
Avdeling for komparativ medisin (AKM)

Responsible researcher:  
Pettersen

Animal ID:  
(P18-2b)

30  
Wapp  
4

| Parameter                                               | State                                        | Assessment scale | Date  | Date  | Date  | Date  | Date  | Date  | Date | Date | Date | Date | Date |
|---------------------------------------------------------|----------------------------------------------|------------------|-------|-------|-------|-------|-------|-------|------|------|------|------|------|
| General appearance                                      | Normal                                       | 0                | 18/12 | 22/12 | 23/12 | 24/12 | 30/12 | 31/12 | 1/1  | 2/1  | 13/1 | 15/1 | 16/1 |
|                                                         | Reduced grooming                             | 1                |       |       |       |       |       |       |      |      |      |      |      |
|                                                         | Minor distention of abdomen, rough hair coat | 3                |       |       |       |       |       |       |      |      |      |      |      |
|                                                         | Hunched back or distended abdomen, inactive  | 18               |       |       |       |       |       |       |      |      |      |      |      |
| Behaviour (Level of activity)                           | Normal                                       | 0                |       |       |       |       |       |       |      |      |      |      |      |
|                                                         | Slightly reduced                             | 1                |       |       |       |       |       |       |      |      |      |      |      |
|                                                         | Moderately reduced                           | 3                |       |       |       |       |       |       |      |      |      |      |      |
|                                                         | Distressed behaviour due to growing tumour   | 3                |       |       |       |       |       |       |      |      |      |      |      |
|                                                         | Obviously reduced                            | 5                |       |       |       |       |       |       |      |      |      |      |      |
| Body weight (Compared to body weight before experiment) | Isolated, inactive, lethargic                | 18               | 23.8  | 23.4  | 22.8  | 23.0  | 23.7  | 23.8  | 24.5 | 23.5 | 24.4 | 24.4 | 24.4 |
|                                                         | Body weight:                                 |                  |       |       |       |       |       |       |      |      |      |      |      |
|                                                         | No loss                                      | 0                |       |       |       |       |       |       |      |      |      |      |      |
|                                                         | Loss < 5%                                    | 1                |       |       |       |       |       |       |      |      |      |      |      |
|                                                         | Loss 5-9%                                    | 3                |       |       |       |       |       |       |      |      |      |      |      |
|                                                         | Loss 10-14%                                  | 5                |       |       |       |       |       |       |      |      |      |      |      |
| Clinical signs (Infection, bleeding, discoloration)     | Loss ≥ 15%                                   | 18               |       |       |       |       |       |       |      |      |      |      |      |
|                                                         | Normal                                       | 0                |       |       |       |       |       |       |      |      |      |      |      |
|                                                         | Minor irritation around surgical wound       | 1                | ser   | -1-   | -1-   | -1-   | -1-   | -1-   | -1-  | -1-  | -1-  | -1-  | -1-  |
|                                                         | Moderate irritation/infected surgical wound  | 3                | ser   | -1-   | -1-   | -1-   | -1-   | -1-   | -1-  | -1-  | -1-  | -1-  | -1-  |
|                                                         | Infected/open surgical wound                 | 4*               | ser   | -1-   | -1-   | -1-   | -1-   | -1-   | -1-  | -1-  | -1-  | -1-  | -1-  |
|                                                         | Tumour > 1.0 cm in diameter                  | 10               |       |       |       |       |       |       |      |      |      |      |      |
|                                                         | Tumour > 1.5 cm in diameter                  | 18               |       |       |       |       |       |       |      |      |      |      |      |
|                                                         | Ulcerous tumour                              | 18               |       |       |       |       |       |       |      |      |      |      |      |
| Total:                                                  |                                              |                  |       |       |       |       |       |       |      |      |      |      |      |
| Comments, treatments etc:                               |                                              |                  |       |       |       |       |       |       |      |      |      |      |      |

NTNU

Score sheet FOTS:  
Avdeling for komparativ medisin (AKM)

Responsible researcher:  
Pettersen

Animal ID:  
(P18-2b)

30  
Wapp  
4

| Parameter                                               | State                                        | Assessment scale | Date | Date | Date | Date | Date | Date | Date | Date | Date | Date | Date |
|---------------------------------------------------------|----------------------------------------------|------------------|------|------|------|------|------|------|------|------|------|------|------|
| General appearance                                      | Normal                                       | 0                | 20/1 | 22/1 | 24/1 | 27/1 | 29/1 | 30/1 | 3/2  | 5/2  | 7/2  | 11/2 |      |
|                                                         | Reduced grooming                             | 1                |      |      |      |      |      |      |      |      |      |      |      |
|                                                         | Minor distention of abdomen, rough hair coat | 3                |      |      |      |      |      |      |      |      |      |      |      |
|                                                         | Hunched back or distended abdomen, inactive  | 18               |      |      |      |      |      |      |      |      |      |      |      |
| Behaviour (Level of activity)                           | Normal                                       | 0                |      |      |      |      |      |      |      |      |      |      |      |
|                                                         | Slightly reduced                             | 1                |      |      |      |      |      |      |      |      |      |      |      |
|                                                         | Moderately reduced                           | 3                |      |      |      |      |      |      |      |      |      |      |      |
|                                                         | Distressed behaviour due to growing tumour   | 3                |      |      |      |      |      |      |      |      |      |      |      |
|                                                         | Obviously reduced                            | 5                |      |      |      |      |      |      |      |      |      |      |      |
| Body weight (Compared to body weight before experiment) | Isolated, inactive, lethargic                | 18               | 23.4 | 22.8 | 23   | 24.2 | 24.2 | 23.5 | 22.5 | 23.1 | 24.4 |      |      |
|                                                         | Body weight:                                 |                  |      |      |      |      |      |      |      |      |      |      |      |
|                                                         | No loss                                      | 0                |      |      |      |      |      |      |      |      |      |      |      |
|                                                         | Loss < 5%                                    | 1                |      |      |      |      |      |      |      |      |      |      |      |
|                                                         | Loss 5-9%                                    | 3                |      |      |      |      |      |      |      |      |      |      |      |
|                                                         | Loss 10-14%                                  | 5                |      |      |      |      |      |      |      |      |      |      |      |
| Clinical signs (Infection, bleeding, discoloration)     | Loss ≥ 15%                                   | 18               |      |      |      |      |      |      |      |      |      |      |      |
|                                                         | Normal                                       | 0                |      |      |      |      |      |      |      |      |      |      |      |
|                                                         | Minor irritation around surgical wound       | 1                | ser  | -1-  | -1-  | -1-  | -1-  | -1-  | -1-  | -1-  | -1-  | -1-  | -1-  |
|                                                         | Moderate irritation/infected surgical wound  | 3                | ser  | -1-  | -1-  | -1-  | -1-  | -1-  | -1-  | -1-  | -1-  | -1-  | -1-  |
|                                                         | Infected/open surgical wound                 | 4*               | ser  | -1-  | -1-  | -1-  | -1-  | -1-  | -1-  | -1-  | -1-  | -1-  | -1-  |
|                                                         | Tumour > 1.0 cm in diameter                  | 10               |      |      |      |      |      |      |      |      |      |      |      |
|                                                         | Tumour > 1.5 cm in diameter                  | 18               |      |      |      |      |      |      |      |      |      |      |      |
|                                                         | Ulcerous tumour                              | 18               |      |      |      |      |      |      |      |      |      |      |      |
| Total:                                                  |                                              |                  |      |      |      |      |      |      |      |      |      |      |      |
| Comments, treatments etc:                               |                                              |                  |      |      |      |      |      |      |      |      |      |      |      |

NTNU

Score sheet FOTS:  
Avdeling for komparativ medisin (AKM)

Responsible researcher:  
Pettersen

Animal ID:  
(P18-2b)

30  
Wapp  
4

| Parameter                                               | State                                        | Assessment scale | Date | Date | Date | Date | Date | Date | Date | Date | Date | Date | Date |
|---------------------------------------------------------|----------------------------------------------|------------------|------|------|------|------|------|------|------|------|------|------|------|
| General appearance                                      | Normal                                       | 0                | 11/2 | 12/2 | 14/2 | 17/2 | 19/2 | 21/2 | 24/2 | 26/2 | 28/2 | 29/2 | 9/3  |
|                                                         | Reduced grooming                             | 1                |      |      |      |      |      |      |      |      |      |      |      |
|                                                         | Minor distention of abdomen, rough hair coat | 3                |      |      |      |      |      |      |      |      |      |      |      |
|                                                         | Hunched back or distended abdomen, inactive  | 18               |      |      |      |      |      |      |      |      |      |      |      |
| Behaviour (Level of activity)                           | Normal                                       | 0                |      |      |      |      |      |      |      |      |      |      |      |
|                                                         | Slightly reduced                             | 1                |      |      |      |      |      |      |      |      |      |      |      |
|                                                         | Moderately reduced                           | 3                |      |      |      |      |      |      |      |      |      |      |      |
|                                                         | Distressed behaviour due to growing tumour   | 3                |      |      |      |      |      |      |      |      |      |      |      |
|                                                         | Obviously reduced                            | 5                |      |      |      |      |      |      |      |      |      |      |      |
| Body weight (Compared to body weight before experiment) | Isolated, inactive, lethargic                | 18               | 24.4 | 23.5 | 23   | 24.1 | 23.7 | 22.6 | 22.6 | 22.5 | 22.1 | 22   | 23   |
|                                                         | Body weight:                                 |                  |      |      |      |      |      |      |      |      |      |      |      |
|                                                         | No loss                                      | 0                |      |      |      |      |      |      |      |      |      |      |      |
|                                                         | Loss < 5%                                    | 1                |      |      |      |      |      |      |      |      |      |      |      |
|                                                         | Loss 5-9%                                    | 3                |      |      |      |      |      |      |      |      |      |      |      |
|                                                         | Loss 10-14%                                  | 5                |      |      |      |      |      |      |      |      |      |      |      |
| Clinical signs (Infection, bleeding, discoloration)     | Loss ≥ 15%                                   | 18               |      |      |      |      |      |      |      |      |      |      |      |
|                                                         | Normal                                       | 0                |      |      |      |      |      |      |      |      |      |      |      |
|                                                         | Minor irritation around surgical wound       | 1                | ser  | -1-  | -1-  | -1-  | -1-  | -1-  | -1-  | -1-  | -1-  | -1-  | -1-  |
|                                                         | Moderate irritation/infected surgical wound  | 3                | ser  | -1-  | -1-  | -1-  | -1-  | -1-  | -1-  | -1-  | -1-  | -1-  | -1-  |
|                                                         | Infected/open surgical wound                 | 4*               | ser  | -1-  | -1-  | -1-  | -1-  | -1-  | -1-  | -1-  | -1-  | -1-  | -1-  |
|                                                         | Tumour > 1.0 cm in diameter                  | 10               |      |      |      |      |      |      |      |      |      |      |      |
|                                                         | Tumour > 1.5 cm in diameter                  | 18               |      |      |      |      |      |      |      |      |      |      |      |
|                                                         | Ulcerous tumour                              | 18               |      |      |      |      |      |      |      |      |      |      |      |
| Total:                                                  |                                              |                  |      |      |      |      |      |      |      |      |      |      |      |
| Comments, treatments etc:                               |                                              |                  |      |      |      |      |      |      |      |      |      |      |      |



Supplementary figure 1-30-5.  
Mouse and xenograft growth curves

Weight curve

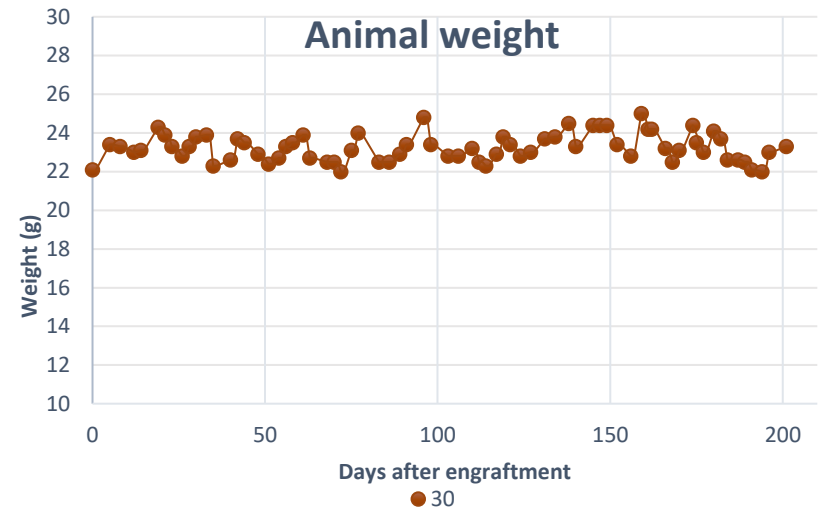

Xenograft growth curve

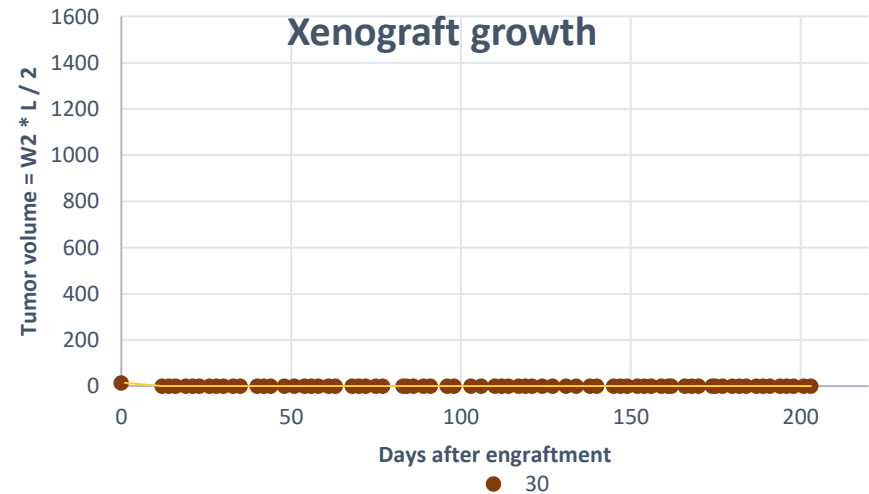

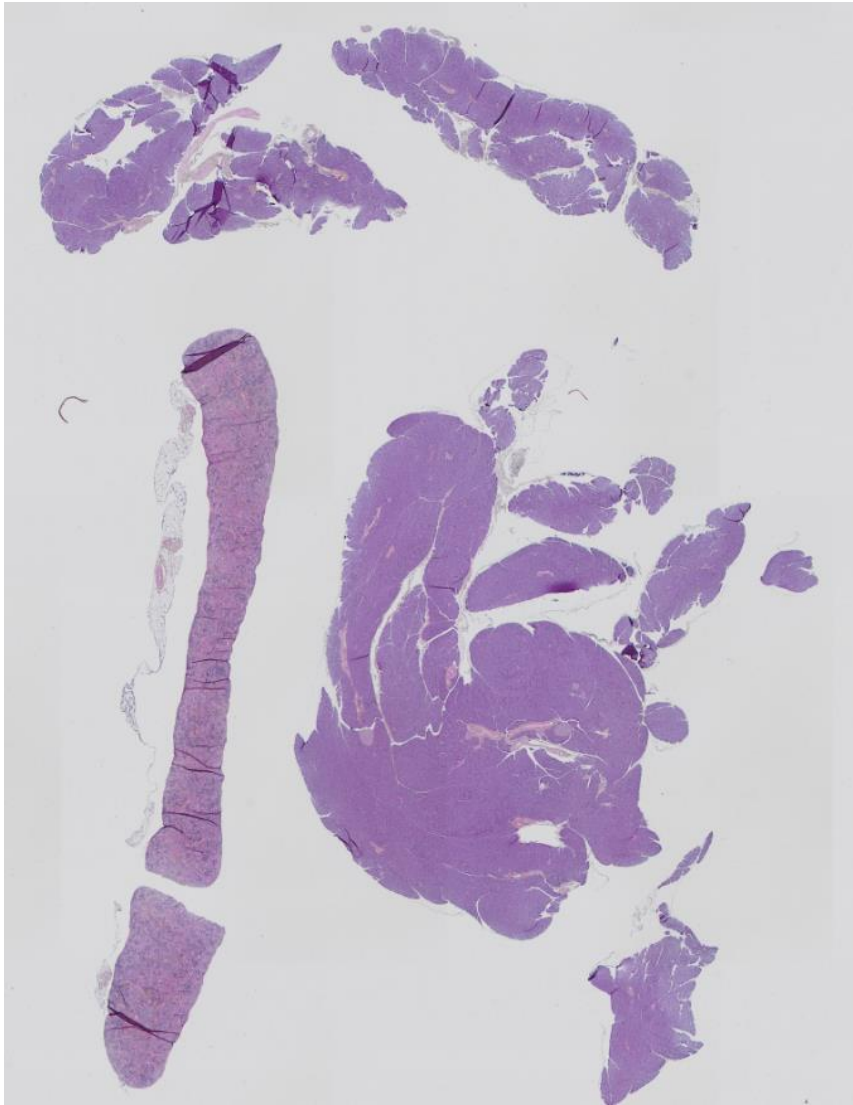

M30MP – Spleen and pancreas

- Look normal

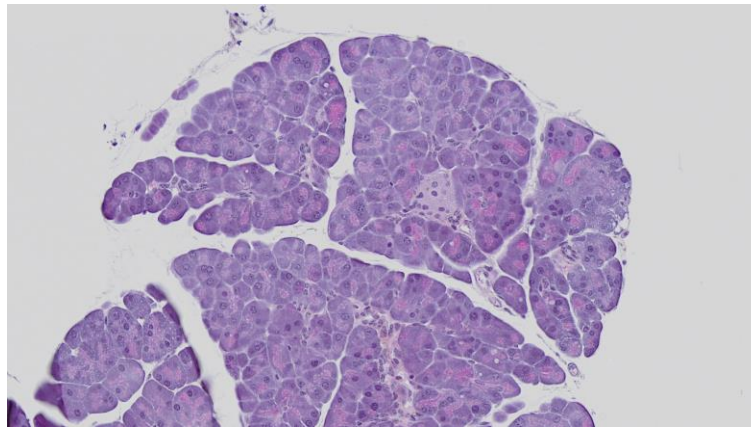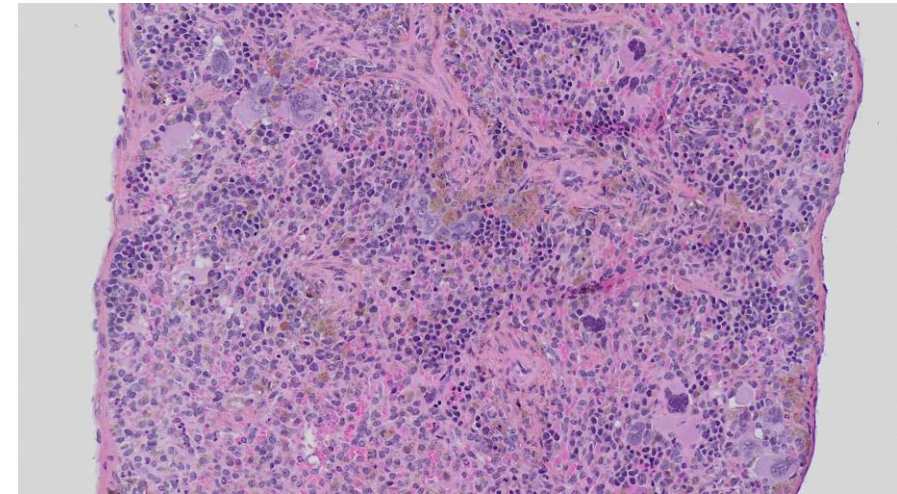



## Supplementary figure 1-30-6. Histology pictures

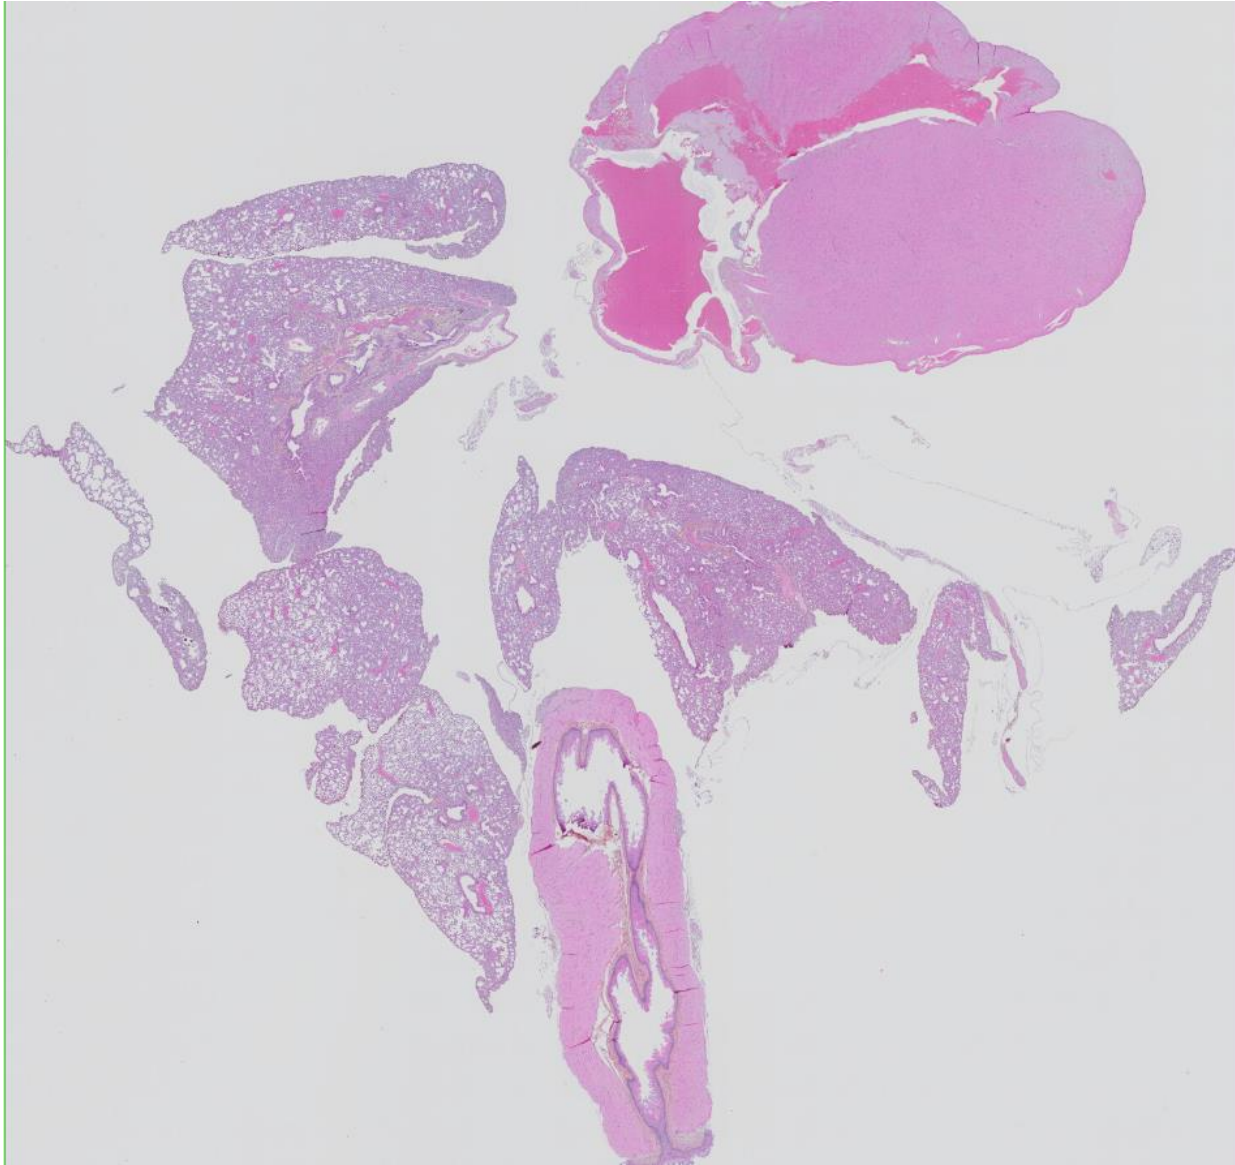

M30LH – Lungs and heart

- Look normal

## Mouse 31

- Surgery date: 03.09.19
  - Age (weeks) 33
  - Weight (g) 23.8
  - Tumor fragment P19-1a
  - Fragment size 3 x 3 mm
  - Ear marks 1

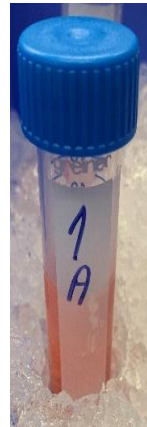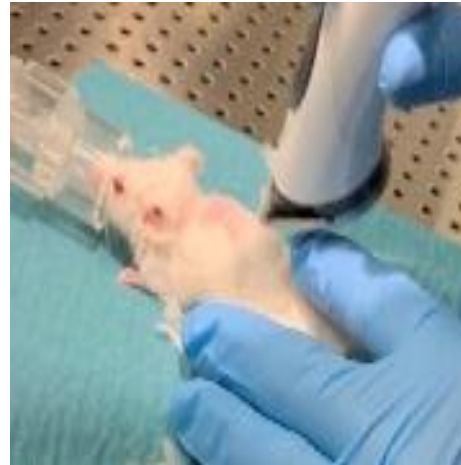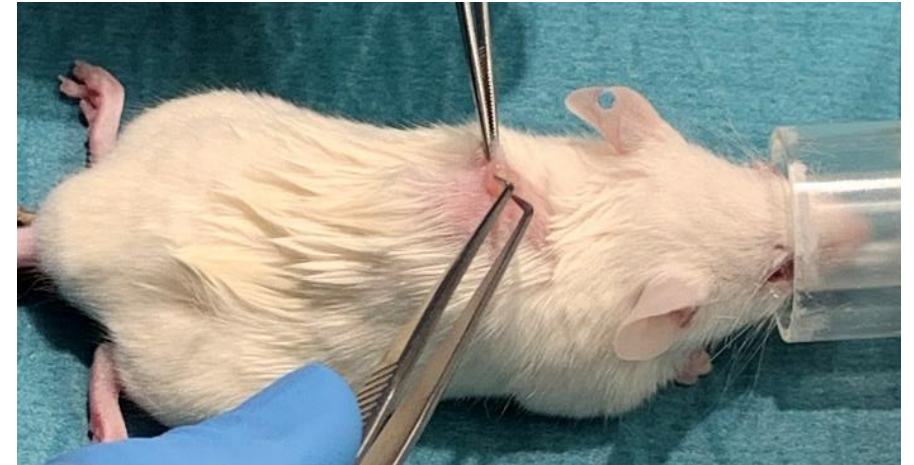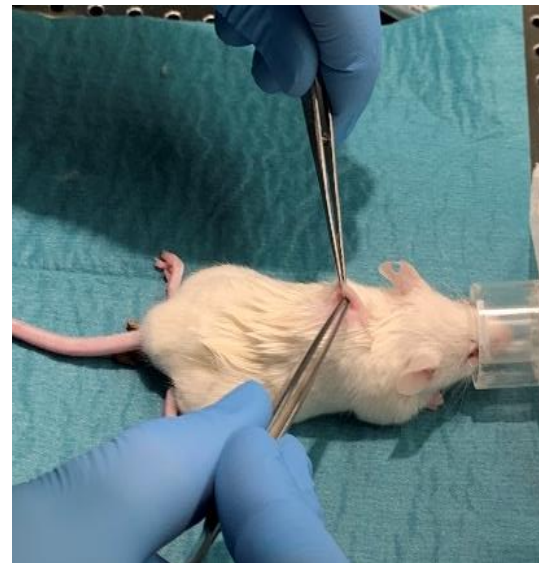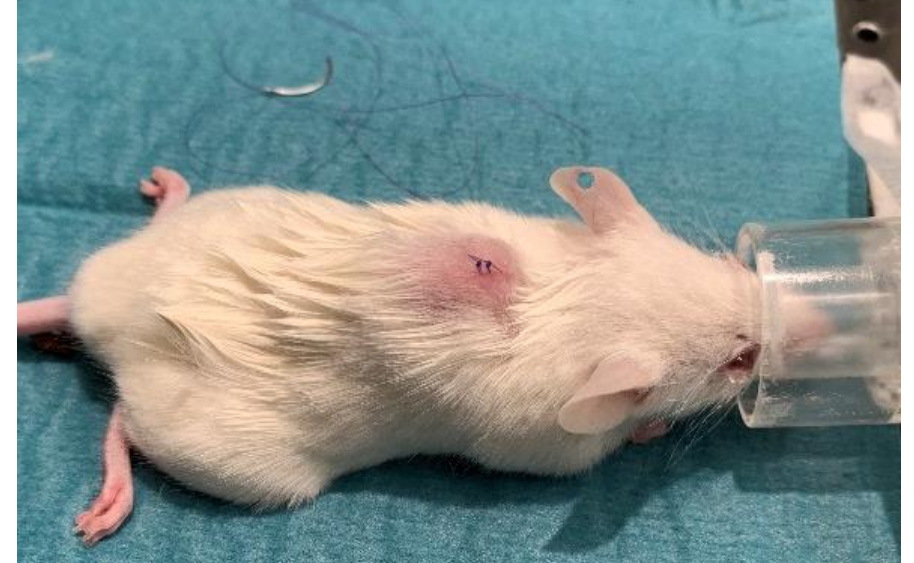

**Supplementary figure 1-31-1.** Pictures from the engraftment day



## Page 134

$$2w + 1d$$
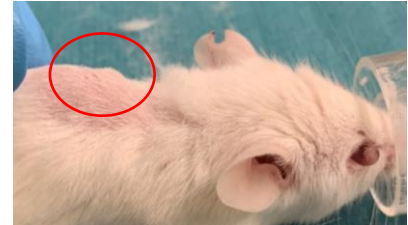
$$7w + 2d$$
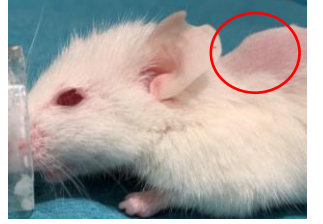
$$14w + 0d$$
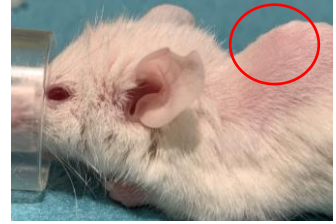
$$21w + 1d$$
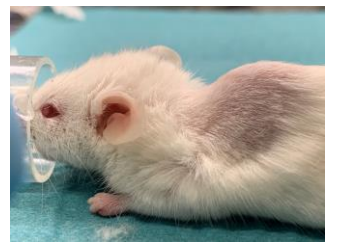

27w + 0d

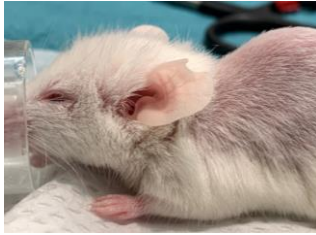



**Supplementary figure 1-31-3. Pictures from euthanization (11.03.20)**

- No treatment given (no xenograft growth)
- Xenograft size – not visible
- Small/normal spleen
- Euthanized due to xenograft not growing after 6 months

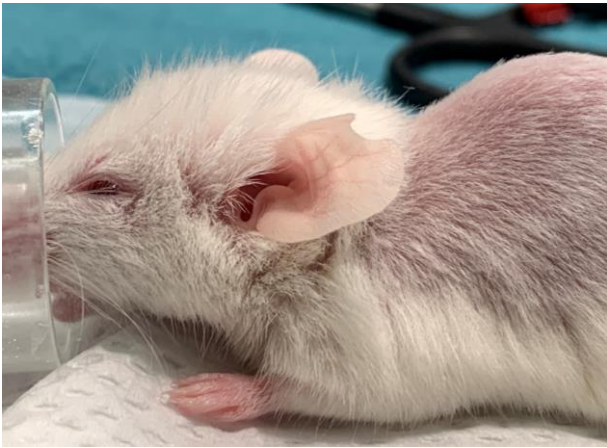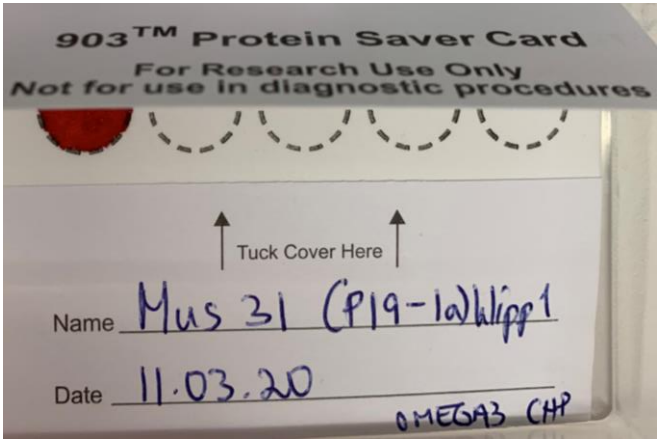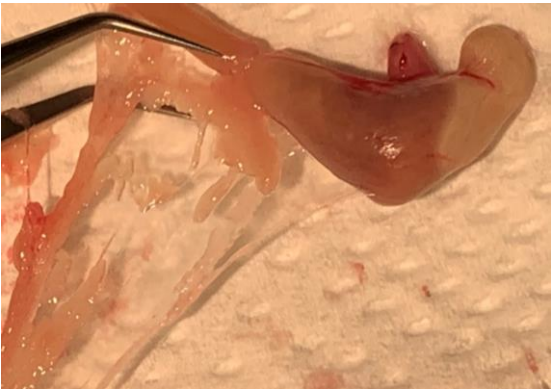

Stomach and pancreatic tissue

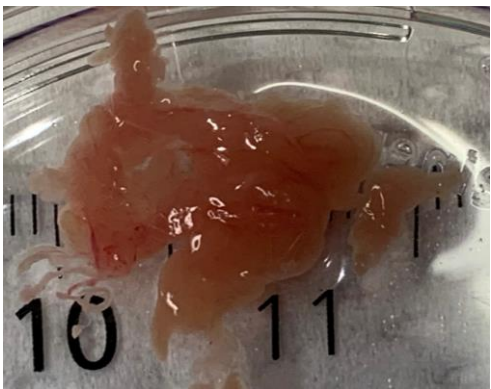

Pancreas

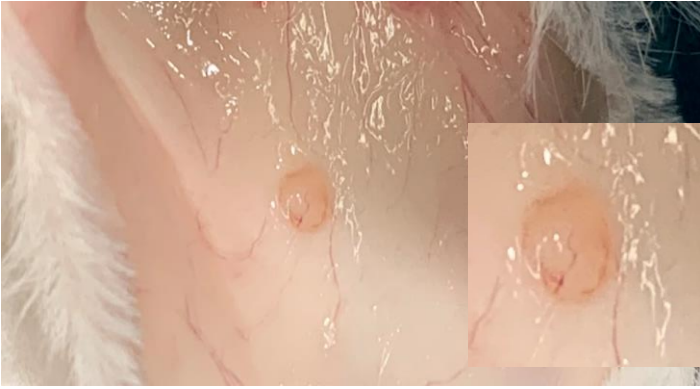

Small xenograft under the skin

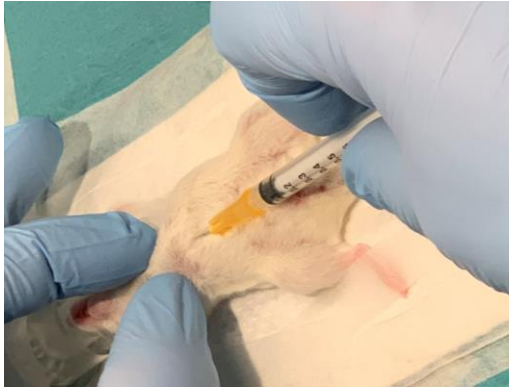

Blood sampling

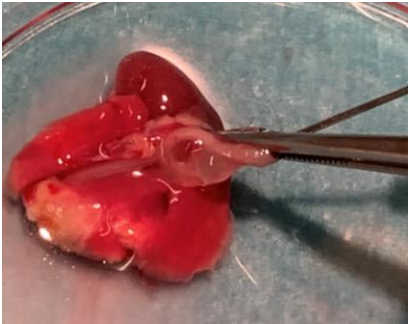

Lungs filled with formalin

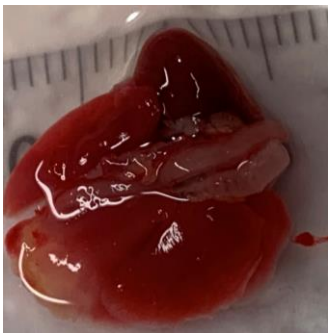

Normal lungs and heart

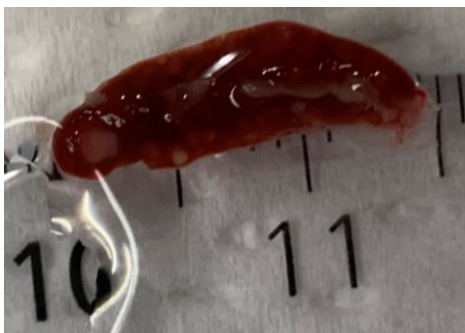

Normal spleen

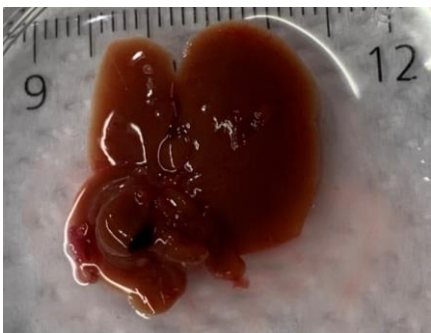

Normal liver

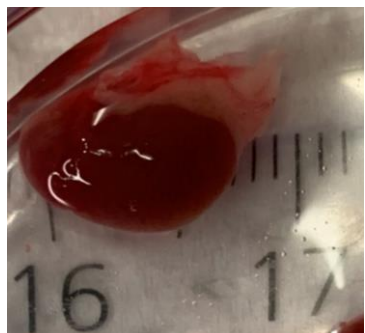

Normal kidney

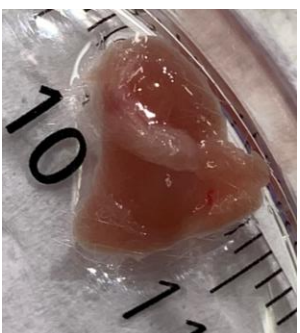

Thymus



Supplementary figure 1-31-4. Autopsy card filled out during necroscopy

AUTOPSY CARD

|                             |                                            |                      |            |                                                       |
|-----------------------------|--------------------------------------------|----------------------|------------|-------------------------------------------------------|
| NUMBER<br>31 (P19-1a) Wipp1 | Male<br>Female<br>♀                        | STRAIN<br>UEA NO3    | BIRTH DATE | EXPERIMENT<br>POX - xenograft 3/9/19                  |
| AGE AT DEATH                | DEATH MODE<br>DATE 11.03.20                |                      |            | GROUP<br>Pettersen, Caroline                          |
|                             | CLINICAL SYMPTOMS AT DEATH<br>Fisk/healthy |                      |            |                                                       |
| ORGAN WEIGHT                |                                            | SECTION TAKEN        |            |                                                       |
| ORGAN                       | WEIGHT                                     | ORGAN                | YES        | GROSS OBSERVATION                                     |
| Femur                       | LH                                         | 1) Lung + Heart      | X          | OK, fylt 4 formelin                                   |
|                             | L                                          | 2) Liver             | X          | OK                                                    |
| Liver                       | RV                                         | 3) Kidney            | X          | OK                                                    |
|                             |                                            | 4) Adrenal           |            |                                                       |
| Spleen                      |                                            | 5) Testis/Ovary      |            |                                                       |
|                             | HP                                         | 6) Spleen + pancreas | X          | size? ca 1,5 cm, normal, litt hvite fett              |
| Kidney                      |                                            | 7) Lymph nodes       |            |                                                       |
|                             |                                            | 8) Bone marrow       |            |                                                       |
| Testis/Ovary                | X                                          | 9) xenograft         | X          | visible? pen liten forhogning, huden, tatt ut til HES |
|                             | T                                          | 10) thymus           | X          |                                                       |
|                             |                                            | 11)                  |            |                                                       |
|                             |                                            | 12)                  |            |                                                       |
|                             |                                            | 13)                  |            |                                                       |

Notes: Blod host ✓  
Blod plasma ✓  
Bilder ✓

Autopsy card modified from: [http://www.pathbase.net/Necropsy\\_of\\_the\\_Mouse/](http://www.pathbase.net/Necropsy_of_the_Mouse/)

Supplementary figure 1-31-5. Score sheets

NTNU Score sheet FOTS: Avdeling for komparativ medisin (AKM) Responsible researcher: Pettersen Animal ID: (P19-1a) 31 klipp 1

| Parameter                                               | State                                        | Assessment scale | Date | Date | Date | Date | Date | Date | Date | Date | Date | Date |
|---------------------------------------------------------|----------------------------------------------|------------------|------|------|------|------|------|------|------|------|------|------|
| General appearance                                      | Normal                                       | 0                | 24   | 4/9  | 6/9  | 9/9  | 11/9 | 13/9 | 16/9 | 17/9 | 20/9 | 23/9 |
|                                                         | Reduced grooming                             | 1                |      |      |      |      |      |      |      |      |      |      |
|                                                         | Minor distention of abdomen, rough hair coat | 3                |      |      |      |      |      |      |      |      |      |      |
|                                                         | Hunchback or distended abdomen, inactive     | 18               |      |      |      |      |      |      |      |      |      |      |
| Behaviour (Level of activity)                           | Normal                                       | 0                |      |      |      |      |      |      |      |      |      |      |
|                                                         | Slightly reduced                             | 1                |      |      |      |      |      |      |      |      |      |      |
|                                                         | Moderately reduced                           | 3                |      |      |      |      |      |      |      |      |      |      |
|                                                         | Distressed behaviour due to growing tumour   | 3                |      |      |      |      |      |      |      |      |      |      |
|                                                         | Obviously reduced                            | 5                |      |      |      |      |      |      |      |      |      |      |
| Body weight (Compared to body weight before experiment) | Isolated, inactive, lethargic                | 18               |      |      |      |      |      |      |      |      |      |      |
|                                                         | Body weight:                                 |                  | 23,8 | 23,2 | 23,4 | 23,2 | 24,5 | 23,6 | 24,2 | 23,5 | 23,3 |      |
|                                                         | No less                                      | 0                |      |      |      |      |      |      |      |      |      |      |
|                                                         | Loss < 5%                                    | 1                |      |      |      |      |      |      |      |      |      |      |
|                                                         | Loss 5-9%                                    | 3                |      |      |      |      |      |      |      |      |      |      |
| Clinical signs (Infection, bleeding, discoloration)     | Loss 10-14%                                  | 5                |      |      |      |      |      |      |      |      |      |      |
|                                                         | Loss > 15%                                   | 18               |      |      |      |      |      |      |      |      |      |      |
|                                                         | Normal                                       | 0                |      |      |      |      |      |      |      |      |      |      |
|                                                         | Minor irritation around surgical wound       | 1                |      |      |      |      |      |      |      |      |      |      |
|                                                         | Moderate irritation/infected surgical wound  | 3                |      |      |      |      |      |      |      |      |      |      |
| Total:                                                  | Infected/open surgical wound                 | 4*               |      |      |      |      |      |      |      |      |      |      |
|                                                         | Tumour > 1,0 cm in diameter                  | 10               |      |      |      |      |      |      |      |      |      |      |
|                                                         | Tumour > 1,5 cm in diameter                  | 18               |      |      |      |      |      |      |      |      |      |      |
|                                                         | Ulcerous tumour                              | 18               |      |      |      |      |      |      |      |      |      |      |
|                                                         | Comments, treatments etc:                    |                  |      |      |      |      |      |      |      |      |      |      |

0-3: Normal  
4-9: Pay attention to health state and consider treatment  
10-13: Pay close attention to health state, consider treatment or euthanasia  
14-18: Euthanasia \*Start treatment with antibiotics. If no effect within 3 days, euthanize the animal

NTNU Score sheet FOTS: Avdeling for komparativ medisin (AKM) Responsible researcher: Pettersen Animal ID: (P19-1a) 31 klipp 1

| Parameter                                               | State                                        | Assessment scale | Date | Date | Date | Date | Date | Date  | Date  | Date  | Date  | Date  |
|---------------------------------------------------------|----------------------------------------------|------------------|------|------|------|------|------|-------|-------|-------|-------|-------|
| General appearance                                      | Normal                                       | 0                | 25/9 | 30/9 | 2/10 | 4/10 | 8/10 | 11/10 | 14/10 | 16/10 | 18/10 | 21/10 |
|                                                         | Reduced grooming                             | 1                |      |      |      |      |      |       |       |       |       |       |
|                                                         | Minor distention of abdomen, rough hair coat | 3                |      |      |      |      |      |       |       |       |       |       |
|                                                         | Hunchback or distended abdomen, inactive     | 18               |      |      |      |      |      |       |       |       |       |       |
| Behaviour (Level of activity)                           | Normal                                       | 0                |      |      |      |      |      |       |       |       |       |       |
|                                                         | Slightly reduced                             | 1                |      |      |      |      |      |       |       |       |       |       |
|                                                         | Moderately reduced                           | 3                |      |      |      |      |      |       |       |       |       |       |
|                                                         | Distressed behaviour due to growing tumour   | 3                |      |      |      |      |      |       |       |       |       |       |
|                                                         | Obviously reduced                            | 5                |      |      |      |      |      |       |       |       |       |       |
| Body weight (Compared to body weight before experiment) | Isolated, inactive, lethargic                | 18               |      |      |      |      |      |       |       |       |       |       |
|                                                         | Body weight:                                 |                  | 23,3 | 23,7 | 24,3 | 23,2 | 22,8 | 23,7  | 23,9  | 25,1  | 25    | 23,9  |
|                                                         | No less                                      | 0                |      |      |      |      |      |       |       |       |       |       |
|                                                         | Loss < 5%                                    | 1                |      |      |      |      |      |       |       |       |       |       |
|                                                         | Loss 5-9%                                    | 3                |      |      |      |      |      |       |       |       |       |       |
| Clinical signs (Infection, bleeding, discoloration)     | Loss 10-14%                                  | 5                |      |      |      |      |      |       |       |       |       |       |
|                                                         | Loss > 15%                                   | 18               |      |      |      |      |      |       |       |       |       |       |
|                                                         | Normal                                       | 0                |      |      |      |      |      |       |       |       |       |       |
|                                                         | Minor irritation around surgical wound       | 1                |      |      |      |      |      |       |       |       |       |       |
|                                                         | Moderate irritation/infected surgical wound  | 3                |      |      |      |      |      |       |       |       |       |       |
| Total:                                                  | Infected/open surgical wound                 | 4*               |      |      |      |      |      |       |       |       |       |       |
|                                                         | Tumour > 1,0 cm in diameter                  | 10               |      |      |      |      |      |       |       |       |       |       |
|                                                         | Tumour > 1,5 cm in diameter                  | 18               |      |      |      |      |      |       |       |       |       |       |
|                                                         | Ulcerous tumour                              | 18               |      |      |      |      |      |       |       |       |       |       |
|                                                         | Comments, treatments etc:                    |                  |      |      |      |      |      |       |       |       |       |       |

0-3: Normal  
4-9: Pay attention to health state and consider treatment  
10-13: Pay close attention to health state, consider treatment or euthanasia

NTNU Score sheet FOTS: Avdeling for komparativ medisin (AKM) Responsible researcher: Pettersen Animal ID: (P19-1a) 31 klipp 1

| Parameter                                               | State                                        | Assessment scale | Date  | Date  | Date  | Date  | Date | Date | Date | Date  | Date  | Date  |
|---------------------------------------------------------|----------------------------------------------|------------------|-------|-------|-------|-------|------|------|------|-------|-------|-------|
| General appearance                                      | Normal                                       | 0                | 21/10 | 23/10 | 28/10 | 30/10 | 1/11 | 4/11 | 9/11 | 13/11 | 13/11 | 15/11 |
|                                                         | Reduced grooming                             | 1                |       |       |       |       |      |      |      |       |       |       |
|                                                         | Minor distention of abdomen, rough hair coat | 3                |       |       |       |       |      |      |      |       |       |       |
|                                                         | Hunchback or distended abdomen, inactive     | 18               |       |       |       |       |      |      |      |       |       |       |
| Behaviour (Level of activity)                           | Normal                                       | 0                |       |       |       |       |      |      |      |       |       |       |
|                                                         | Slightly reduced                             | 1                |       |       |       |       |      |      |      |       |       |       |
|                                                         | Moderately reduced                           | 3                |       |       |       |       |      |      |      |       |       |       |
|                                                         | Distressed behaviour due to growing tumour   | 3                |       |       |       |       |      |      |      |       |       |       |
|                                                         | Obviously reduced                            | 5                |       |       |       |       |      |      |      |       |       |       |
| Body weight (Compared to body weight before experiment) | Isolated, inactive, lethargic                | 18               |       |       |       |       |      |      |      |       |       |       |
|                                                         | Body weight:                                 |                  | 23,9  | 23,8  | 23,2  | 23,6  | 23,4 | 24   | 24,4 | 25,2  |       |       |
|                                                         | No less                                      | 0                |       |       |       |       |      |      |      |       |       |       |
|                                                         | Loss < 5%                                    | 1                |       |       |       |       |      |      |      |       |       |       |
|                                                         | Loss 5-9%                                    | 3                |       |       |       |       |      |      |      |       |       |       |
| Clinical signs (Infection, bleeding, discoloration)     | Loss 10-14%                                  | 5                |       |       |       |       |      |      |      |       |       |       |
|                                                         | Loss > 15%                                   | 18               |       |       |       |       |      |      |      |       |       |       |
|                                                         | Normal                                       | 0                |       |       |       |       |      |      |      |       |       |       |
|                                                         | Minor irritation around surgical wound       | 1                |       |       |       |       |      |      |      |       |       |       |
|                                                         | Moderate irritation/infected surgical wound  | 3                |       |       |       |       |      |      |      |       |       |       |
| Total:                                                  | Infected/open surgical wound                 | 4*               |       |       |       |       |      |      |      |       |       |       |
|                                                         | Tumour > 1,0 cm in diameter                  | 10               |       |       |       |       |      |      |      |       |       |       |
|                                                         | Tumour > 1,5 cm in diameter                  | 18               |       |       |       |       |      |      |      |       |       |       |
|                                                         | Ulcerous tumour                              | 18               |       |       |       |       |      |      |      |       |       |       |
|                                                         | Comments, treatments etc:                    |                  |       |       |       |       |      |      |      |       |       |       |

0-3: Normal  
4-9: Pay attention to health state and consider treatment  
10-13: Pay close attention to health state, consider treatment or euthanasia  
14-18: Euthanasia \*Start treatment with antibiotics. If no effect within 3 days, euthanize the animal

NTNU Score sheet FOTS: Avdeling for komparativ medisin (AKM) Responsible researcher: Pettersen Animal ID: (P19-1a) 31 klipp 1

| Parameter                                               | State                                        | Assessment scale | Date  | Date  | Date  | Date  | Date | Date | Date | Date  | Date  | Date  |
|---------------------------------------------------------|----------------------------------------------|------------------|-------|-------|-------|-------|------|------|------|-------|-------|-------|
| General appearance                                      | Normal                                       | 0                | 18/11 | 20/11 | 25/11 | 28/11 | 2/12 | 5/12 | 9/12 | 11/12 | 13/12 | 14/12 |
|                                                         | Reduced grooming                             | 1                |       |       |       |       |      |      |      |       |       |       |
|                                                         | Minor distention of abdomen, rough hair coat | 3                |       |       |       |       |      |      |      |       |       |       |
|                                                         | Hunchback or distended abdomen, inactive     | 18               |       |       |       |       |      |      |      |       |       |       |
| Behaviour (Level of activity)                           | Normal                                       | 0                |       |       |       |       |      |      |      |       |       |       |
|                                                         | Slightly reduced                             | 1                |       |       |       |       |      |      |      |       |       |       |
|                                                         | Moderately reduced                           | 3                |       |       |       |       |      |      |      |       |       |       |
|                                                         | Distressed behaviour due to growing tumour   | 3                |       |       |       |       |      |      |      |       |       |       |
|                                                         | Obviously reduced                            | 5                |       |       |       |       |      |      |      |       |       |       |
| Body weight (Compared to body weight before experiment) | Isolated, inactive, lethargic                | 18               |       |       |       |       |      |      |      |       |       |       |
|                                                         | Body weight:                                 |                  | 24,1  | 24,5  | 24,7  | 24,6  | 23,4 | 23,2 | 23,5 | 24,4  | 24,1  |       |
|                                                         | No less                                      | 0                |       |       |       |       |      |      |      |       |       |       |
|                                                         | Loss < 5%                                    | 1                |       |       |       |       |      |      |      |       |       |       |
|                                                         | Loss 5-9%                                    | 3                |       |       |       |       |      |      |      |       |       |       |
| Clinical signs (Infection, bleeding, discoloration)     | Loss 10-14%                                  | 5                |       |       |       |       |      |      |      |       |       |       |
|                                                         | Loss > 15%                                   | 18               |       |       |       |       |      |      |      |       |       |       |
|                                                         | Normal                                       | 0                |       |       |       |       |      |      |      |       |       |       |
|                                                         | Minor irritation around surgical wound       | 1                |       |       |       |       |      |      |      |       |       |       |
|                                                         | Moderate irritation/infected surgical wound  | 3                |       |       |       |       |      |      |      |       |       |       |
| Total:                                                  | Infected/open surgical wound                 | 4*               |       |       |       |       |      |      |      |       |       |       |
|                                                         | Tumour > 1,0 cm in diameter                  | 10               |       |       |       |       |      |      |      |       |       |       |
|                                                         | Tumour > 1,5 cm in diameter                  | 18               |       |       |       |       |      |      |      |       |       |       |
|                                                         | Ulcerous tumour                              | 18               |       |       |       |       |      |      |      |       |       |       |
|                                                         | Comments, treatments etc:                    |                  |       |       |       |       |      |      |      |       |       |       |

0-3: Normal  
4-9: Pay attention to health state and consider treatment  
10-13: Pay close attention to health state, consider treatment or euthanasia  
14-18: Euthanasia \*Start treatment with antibiotics. If no effect within 3 days, euthanize the animal



### Supplementary figure 1-31-5. Score sheets

NTNU

Avdeling for komparativ medisin (AKM)

Responsible for:

Petersen

Animal ID: (31)

Wgpr ①

Score sheet FOTS:

Adveling for komparativ medisin (AKM)

| Parameter                                               | State                                        | Assessment scale | Date 18/12 | Date 20/12 | Date 23/12 | Date 26/12 | Date 30/12 | Date 01/10 | Date 06/10 | Date 31/1 | Date 13/1 | Date 15/1 | Date 17/1 |
|---------------------------------------------------------|----------------------------------------------|------------------|------------|------------|------------|------------|------------|------------|------------|-----------|-----------|-----------|-----------|
| General appearance                                      | Normal                                       | 0                |            |            |            |            |            |            |            |           |           |           |           |
|                                                         | Reduced grooming                             | 1                |            |            |            |            |            |            |            |           |           |           |           |
|                                                         | Minor distention of abdomen, rough hair coat | 3                |            |            |            |            |            |            |            |           |           |           |           |
|                                                         | Hunchback or distended abdomen, inactive     | 18               |            |            |            |            |            |            |            |           |           |           |           |
| Behaviour (Level of activity)                           | Normal                                       | 0                |            |            |            |            |            |            |            |           |           |           |           |
|                                                         | Slightly reduced                             | 1                |            |            |            |            |            |            |            |           |           |           |           |
|                                                         | Moderately reduced                           | 3                |            |            |            |            |            |            |            |           |           |           |           |
|                                                         | Distressed behaviour due to growing tumour   | 3                |            |            |            |            |            |            |            |           |           |           |           |
|                                                         | Obviously reduced                            | 5                |            |            |            |            |            |            |            |           |           |           |           |
| Body weight (Compared to body weight before experiment) | Isolated, inactive, lethargic                | 18               |            |            |            |            |            |            |            |           |           |           |           |
|                                                         | Body weight                                  |                  | 23,9       | 23         | 23,5       | 23,0       | 24,9       | 24,8       | 23,2       | 24,2      | 25,1      | 24,0      | 23,3      |
|                                                         | No loss                                      | 0                |            |            |            |            |            |            |            |           |           |           |           |
|                                                         | Loss < 5%                                    | 1                |            |            |            |            |            |            |            |           |           |           |           |
|                                                         | Loss 5-9%                                    | 3                |            |            |            |            |            |            |            |           |           |           |           |
|                                                         | Loss 10-14%                                  | 5                |            |            |            |            |            |            |            |           |           |           |           |
| Clinical signs (Infection, bleeding, discoloration)     | Loss > 15%                                   | 18               |            |            |            |            |            |            |            |           |           |           |           |
|                                                         | Normal                                       | 0                |            |            |            |            |            |            |            |           |           |           |           |
|                                                         | Minor irritation around surgical wound       | 1                |            |            |            |            |            |            |            |           |           |           |           |
|                                                         | Moderate irritation/infected surgical wound  | 3                |            |            |            |            |            |            |            |           |           |           |           |
|                                                         | Infected/open surgical wound                 | 4*               |            |            |            |            |            |            |            |           |           |           |           |
|                                                         | Tumour > 1.0 cm in diameter                  | 10               |            |            |            |            |            |            |            |           |           |           |           |
| Tumour > 1.5 cm in diameter                             | 18                                           |                  |            |            |            |            |            |            |            |           |           |           |           |
|                                                         | 18                                           |                  |            |            |            |            |            |            |            |           |           |           |           |
|                                                         | Uterine tumour                               | 18               |            |            |            |            |            |            |            |           |           |           |           |
| Total:                                                  |                                              |                  |            |            |            |            |            |            |            |           |           |           |           |
| Comments, treatments etc:                               |                                              |                  |            |            |            |            |            |            |            |           |           |           |           |

0-3: Normal

4-9: Pay attention to health state and consider treatment

10-13: Pay close attention to health state, consider treatment or euthanasia

14-18: Euthanasia \*Start treatment with antibiotics. If no effect within 3 days, euthanize the animal

| NTNU Score sheet FOTS:<br>Avdeling for komparativt medisin (AKM) |                                              | Responsible researcher:<br>Petersen |      | Animal ID: (31) |      | Wkpt (1) |      |      |      |      |      |      |
|------------------------------------------------------------------|----------------------------------------------|-------------------------------------|------|-----------------|------|----------|------|------|------|------|------|------|
| Parameter                                                        | State                                        | Assessment scale                    | Date | Date            | Date | Date     | Date | Date | Date | Date | Date |      |
| General appearance                                               | Normal                                       | 0                                   | 20/1 | 22/1            | 24/1 | 27/1     | 31/1 | 30   | 32   | 5/2  | 7/2  | 11/2 |
|                                                                  | Reduced grooming                             | 1                                   |      |                 |      |          |      |      |      |      |      |      |
|                                                                  | Minor distention of abdomen, rough hair coat | 3                                   |      |                 |      |          |      |      |      |      |      |      |
|                                                                  | Hunchback or distended abdomen, inactive     | 18                                  |      |                 |      |          |      |      |      |      |      |      |
| Behaviour (Level of activity)                                    | Normal                                       | 0                                   |      |                 |      |          |      |      |      |      |      |      |
|                                                                  | Slightly reduced                             | 1                                   |      |                 |      |          |      |      |      |      |      |      |
|                                                                  | Moderately reduced                           | 3                                   |      |                 |      |          |      |      |      |      |      |      |
|                                                                  | Distressed behaviour due to growing tumour   | 3                                   |      |                 |      |          |      |      |      |      |      |      |
|                                                                  | Obviously reduced                            | 5                                   |      |                 |      |          |      |      |      |      |      |      |
|                                                                  | Isolated, inactive, lethargic                | 18                                  |      |                 |      |          |      |      |      |      |      |      |
| Body weight (Compared to body weight before experiment)          | Body weight                                  | 0                                   | 23/4 | 24/2            | 24/3 | 24/5     | 25/7 | 25   | 24   | 24/4 |      |      |
|                                                                  | No loss                                      | 1                                   |      |                 |      |          |      |      |      |      |      |      |
|                                                                  | Loss < 5%                                    | 3                                   |      |                 |      |          |      |      |      |      |      |      |
|                                                                  | Loss 5-9 %                                   | 3                                   |      |                 |      |          |      |      |      |      |      |      |
|                                                                  | Loss 10-14%                                  | 5                                   |      |                 |      |          |      |      |      |      |      |      |
|                                                                  | Loss > 15%                                   | 18                                  |      |                 |      |          |      |      |      |      |      |      |
| Clinical signs (Infection, bleeding, discoloration)              | Normal                                       | 0                                   |      |                 |      |          |      |      |      |      |      |      |
|                                                                  | Minor irritation around surgical wound       | 1                                   |      |                 |      |          |      |      |      |      |      |      |
|                                                                  | Moderate irritation/infected surgical wound  | 3                                   |      |                 |      |          |      |      |      |      |      |      |
|                                                                  | Infected/open surgical wound                 | 4*                                  |      |                 |      |          |      |      |      |      |      |      |
|                                                                  | Tumour > 1.0 cm in diameter                  | 10                                  |      |                 |      |          |      |      |      |      |      |      |
|                                                                  | Tumour > 1.5 cm in diameter                  | 18                                  |      |                 |      |          |      |      |      |      |      |      |
|                                                                  | Ulcerous tumour                              | 18                                  |      |                 |      |          |      |      |      |      |      |      |
| Total:                                                           |                                              |                                     |      |                 |      |          |      |      |      |      |      |      |
| Comments, treatments etc:                                        |                                              |                                     |      |                 |      |          |      |      |      |      |      |      |

0-3: Normal  
4-9: Pay attention to health state and consider treatment  
10-13: Pay close attention to health state, consider treatment or euthanasia  
14-18: Euthanasia \*Start treatment with antibiotics. If no effect within 3 days, euthanize the animal

23-25g

**NTU** Source sheet FOTS:  
Avdeling for komparativ medisin (AKM)

Responsible researcher:  
**Pettersen**

Animal ID: 31

Klipp  
1

| Parameter                                               | State                                        | Assessment scale | Date 1/2 | Date 13/2 | Date 14/2 | Date 17/2 | Date 19/2 | Date 21/2 | Date 24/2 | Date 26/2 | Date 28/2 | Date 29/2 |           |
|---------------------------------------------------------|----------------------------------------------|------------------|----------|-----------|-----------|-----------|-----------|-----------|-----------|-----------|-----------|-----------|-----------|
| General appearance                                      | Normal                                       | 0                |          |           |           |           |           |           |           |           |           |           | 4/3 9/3   |
|                                                         | Reduced grooming                             | 1                |          |           |           |           |           |           |           |           |           |           |           |
|                                                         | Minor distention of abdomen, rough hair coat | 3                |          |           |           |           |           |           |           |           |           |           |           |
|                                                         | Hunched or distended abdomen, inactive       | 18               |          |           |           |           |           |           |           |           |           |           |           |
| Behaviour (Level of activity)                           | Normal                                       | 9                |          |           |           |           |           |           |           |           |           |           |           |
|                                                         | Slightly reduced                             | 1                |          |           |           |           |           |           |           |           |           |           |           |
|                                                         | Moderately reduced                           | 3                |          |           |           |           |           |           |           |           |           |           |           |
|                                                         | Diminished behaviour due to growing tumour   | 3                |          |           |           |           |           |           |           |           |           |           |           |
|                                                         | Obviously reduced                            | 5                |          |           |           |           |           |           |           |           |           |           |           |
|                                                         | Isolated, inactive, lethargic                | 18               |          |           |           |           |           |           |           |           |           |           |           |
| Body weight (Compared to body weight before experiment) | Body weight                                  |                  | 24.1     | 22.9      | 24.1      | 24.9      | 25        | 25.8      | 23.4      | 25.6      | 22.8      | 23.1      | 24.3 24.0 |
|                                                         | No loss                                      | 0                |          |           |           |           |           |           |           |           |           |           |           |
|                                                         | Loss < 5%                                    | 1                |          |           |           |           |           |           |           |           |           |           |           |
|                                                         | Loss 5-9%                                    | 3                |          |           |           |           |           |           |           |           |           |           |           |
|                                                         | Loss 10-14%                                  | 5                |          |           |           |           |           |           |           |           |           |           |           |
|                                                         | Loss > 14%                                   | 18               |          |           |           |           |           |           |           |           |           |           |           |
| Clinical signs (Infection, bleeding, discoloration)     | Normal                                       | 0                |          |           |           |           |           |           |           |           |           |           |           |
|                                                         | Minor irritation around surgical wound       | 1                |          |           |           |           |           |           |           |           |           |           |           |
|                                                         | Moderate irritation/infected surgical wound  | 3                |          |           |           |           |           |           |           |           |           |           |           |
|                                                         | Infected/open surgical wound                 | 4 +              |          |           |           |           |           |           |           |           |           |           |           |
|                                                         | Tumour > 1.0 cm in diameter                  | 10               |          |           |           |           |           |           |           |           |           |           |           |
|                                                         | Tumour > 1.5 cm in diameter                  | 18               |          |           |           |           |           |           |           |           |           |           |           |
|                                                         | Ulcerous tumour                              | 18               |          |           |           |           |           |           |           |           |           |           |           |
| Total:                                                  |                                              |                  |          |           |           |           |           |           |           |           |           |           |           |
| Comments, treatments etc:                               |                                              |                  |          |           |           |           |           |           |           |           |           |           |           |

0-3: Normal

4-9: Pay attention to health state and consider treatment

10-15: Pay close attention to health state, consider treatment or euthanasia

16-18: Euthanasia \*Start treatment with antibiotics. If no effect within 3 days, euthanize the animal

11/3  
23.7  
-11-  
ankret

Supplementary figure 1-31-6.  
Mouse and xenograft growth curves

Weight curve

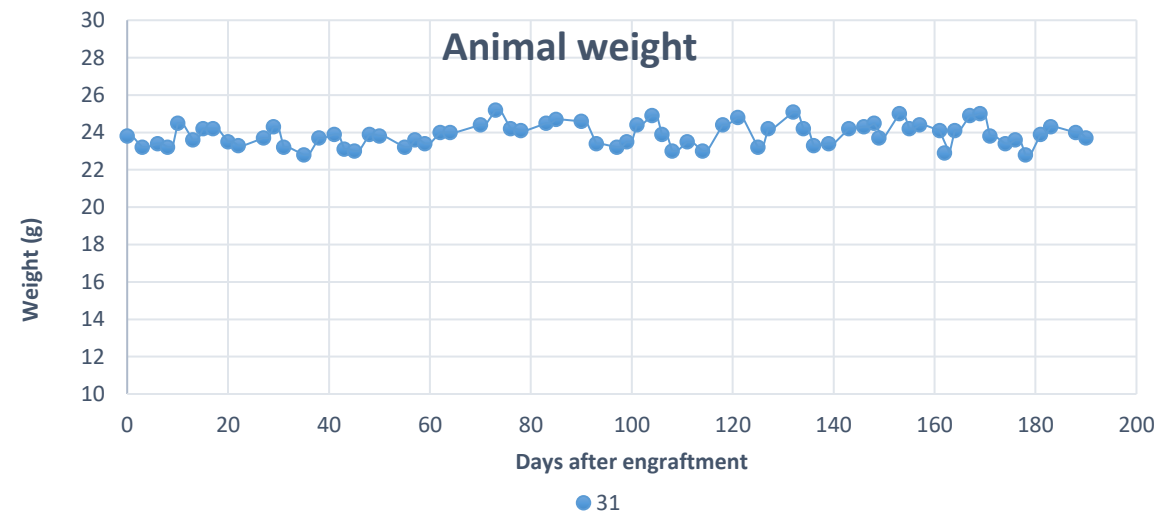

Xenograft growth curve

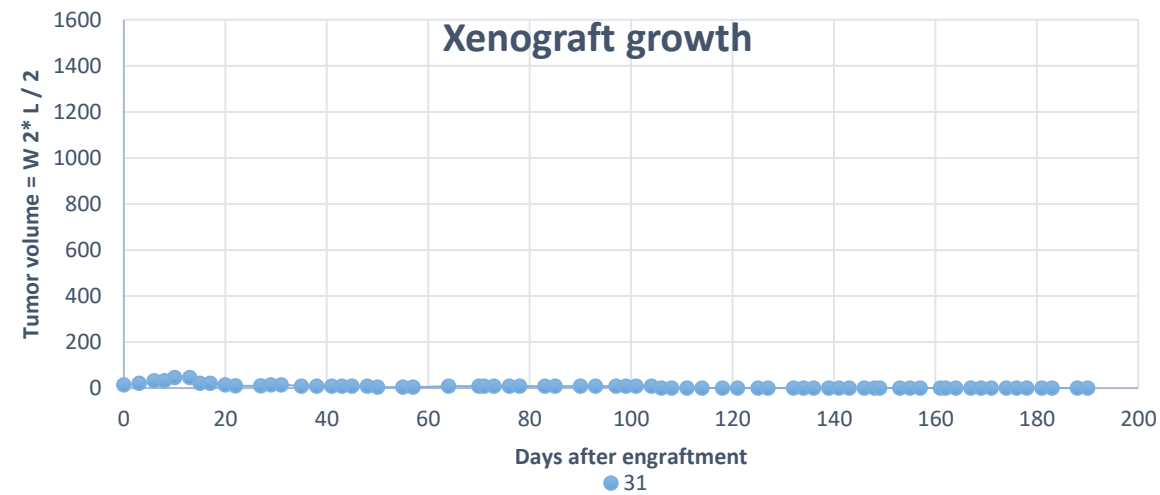



M31X – Remainings of xenograft?

- Looks like an inflammatory reaction that might have killed the xenograft
- Can see multinuclear and lymphoid cells

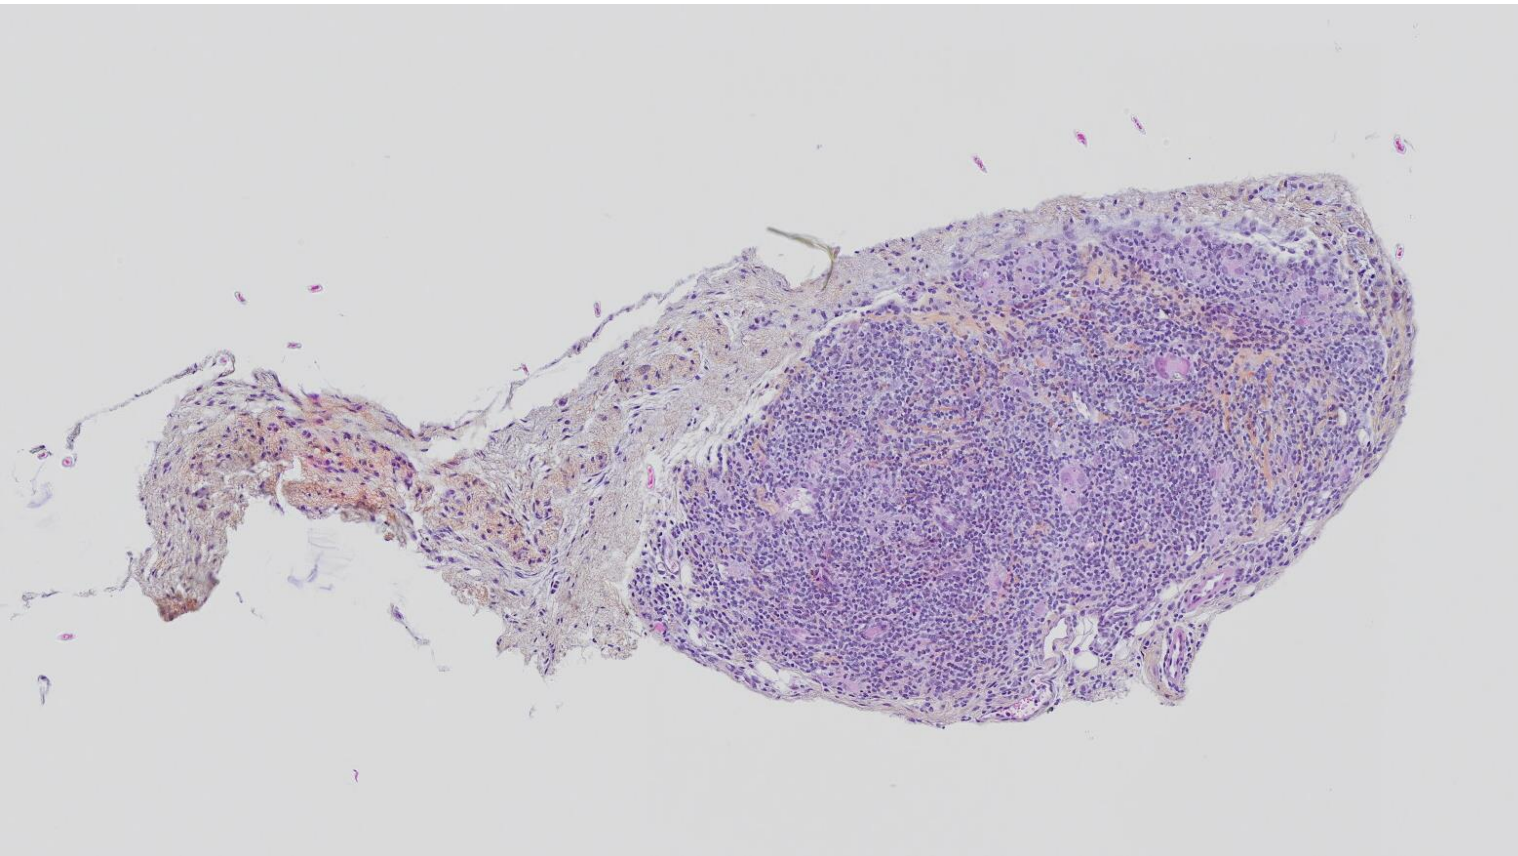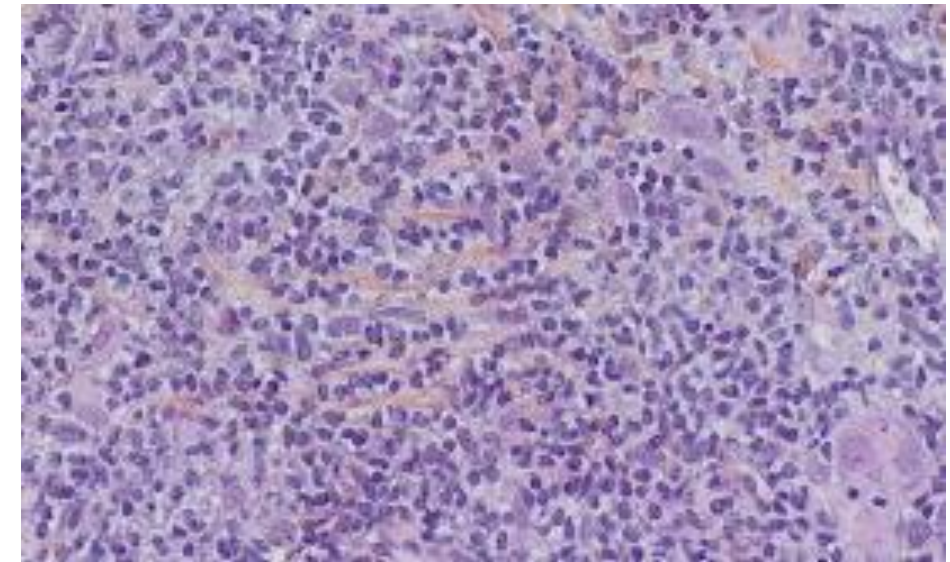

M31MP – Spleen and pancreas

- Looks normal

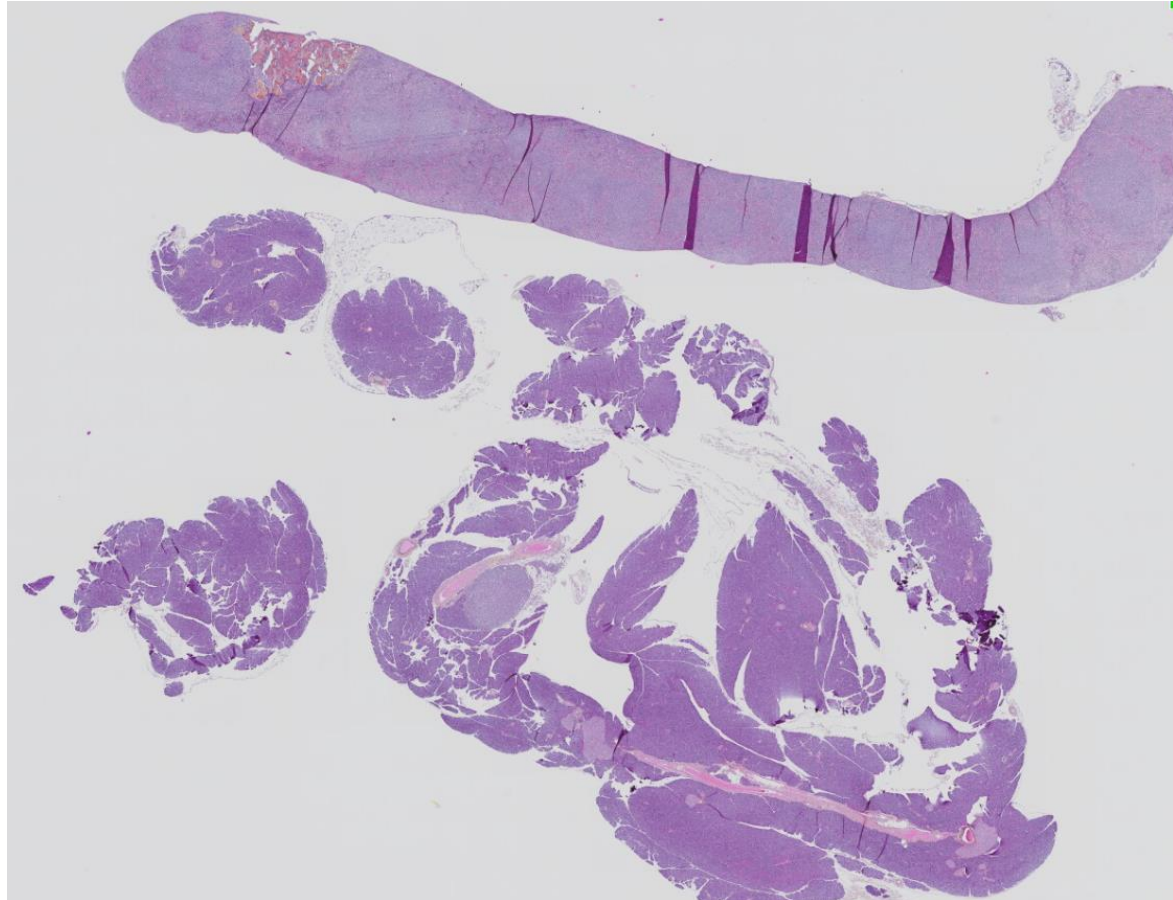

M31LH – Lungs and heart

- Looks normal

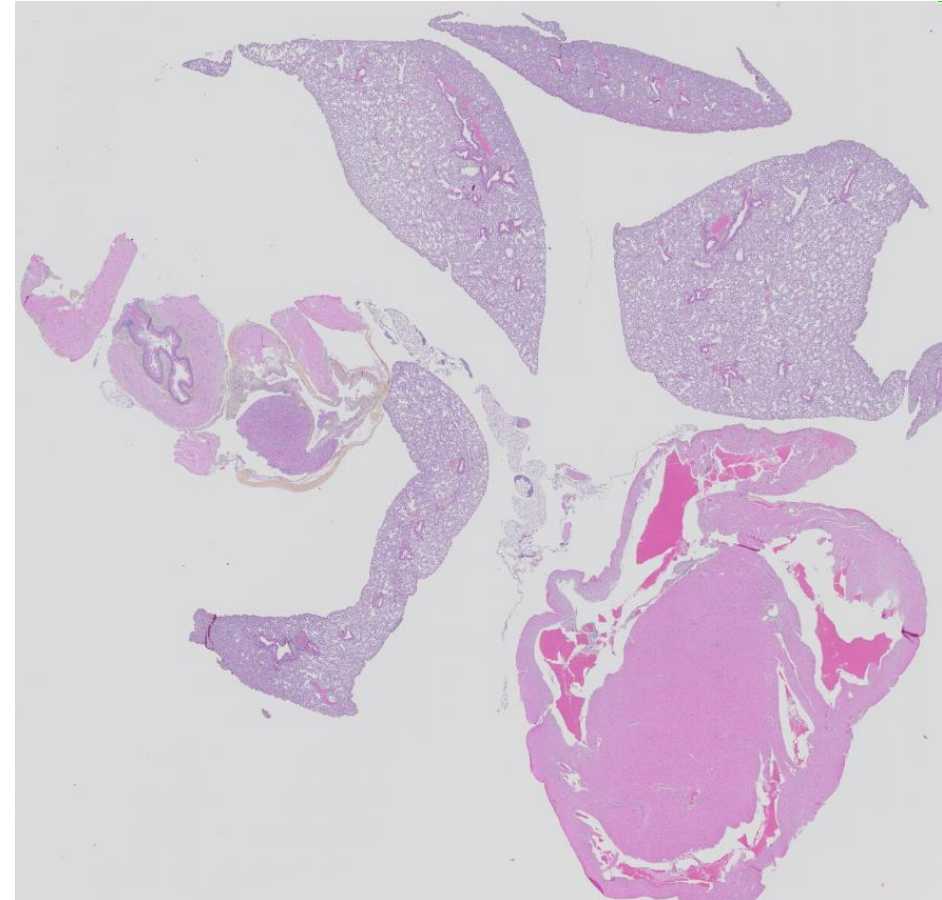



## Mouse 32

- Surgery date: 03.09.19
  - Age (weeks) 33
  - Weight (g) 22.2
  - Tumor fragment P19-1b
  - Fragment size 3 x 3 mm
  - Ear marks 2

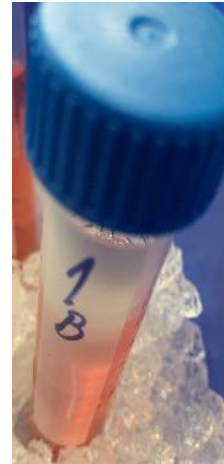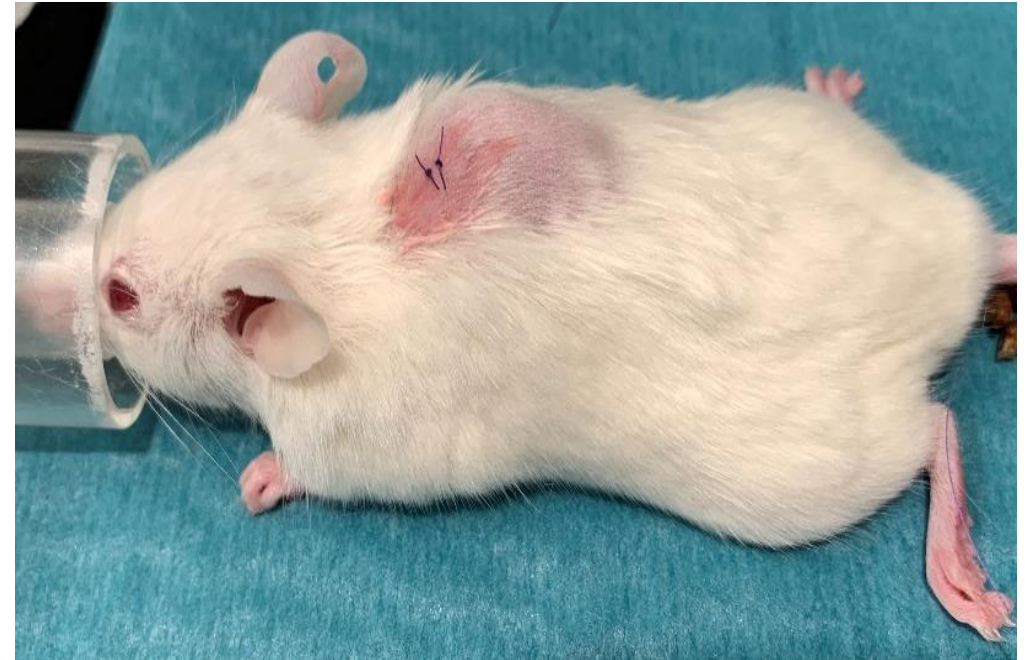

**Supplementary figure 1-32-1.** Pictures from the engraftment day

**Supplementary figure 1-32-2.** Pictures from follow up and xenograft size measurement

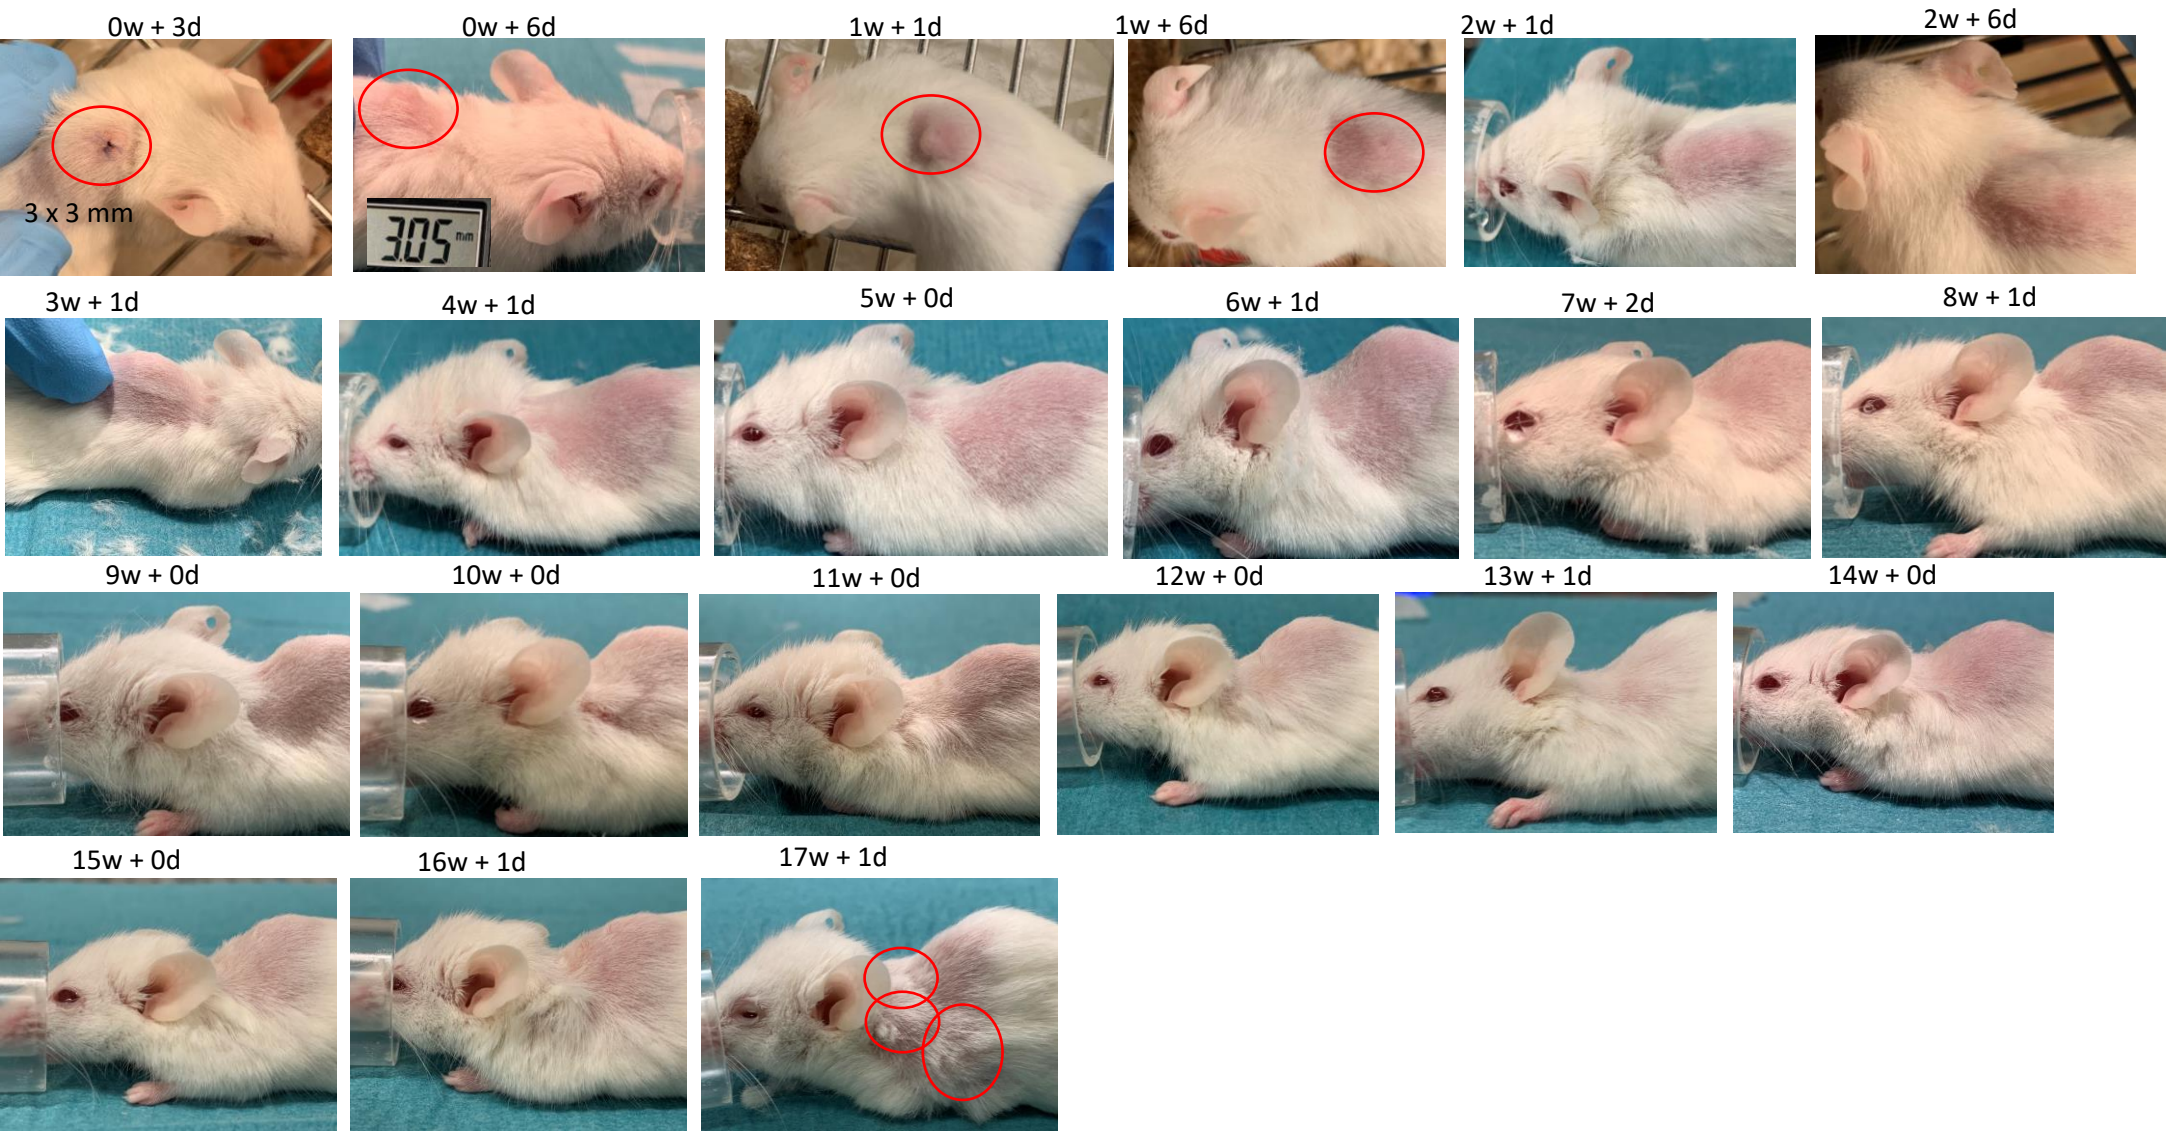



Supplementary figure 1-32-3. Pictures from euthanization (02.01.20)

- No treatment given
- Euthanized due to reduced health and development of secondary tumors before growth of xenograft was established

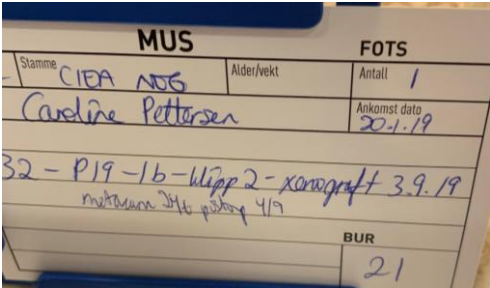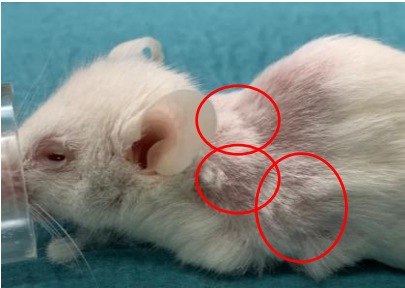

Reduced health, Thick wounded skin at the neck, Liquid in the eye/rinning eye, 3 secondary tumors, The mouse seemed anemic, could not be drawn blood from,

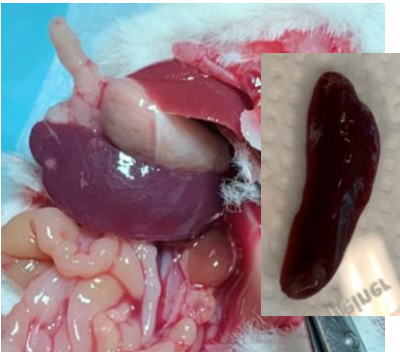

Large spleen, > 2 cm

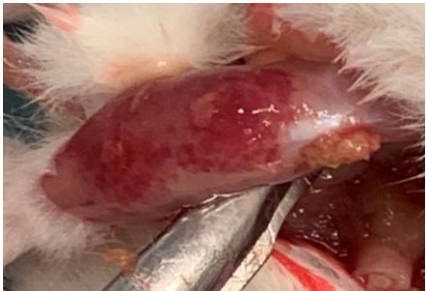

Red svollen legs

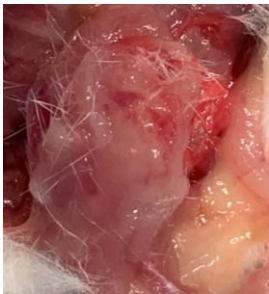

Red marks and svollen left shoulder. Tumor?

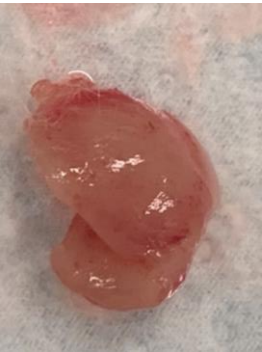

Tumor subcutaneous over the ribs left side

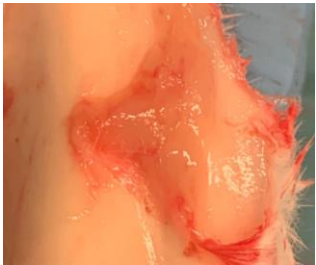

Xenograft? Not growing

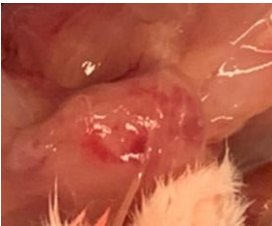

Red marks and svollen right shoulder. Tumor?

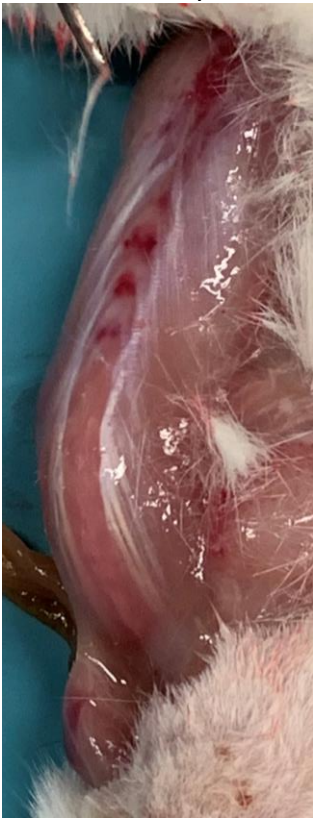

Red marks on the spine

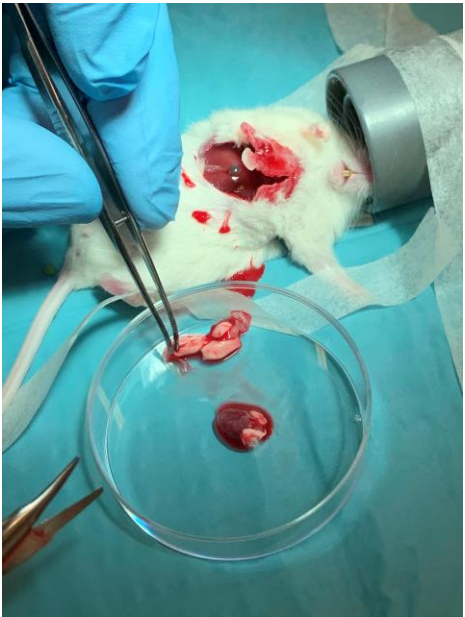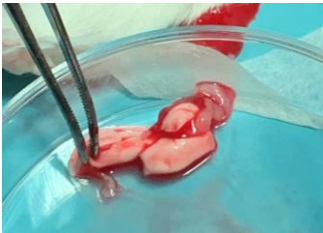

White lungs

## Euthanization mouse #32 (P19-1b) 02.01.2020

### Before euthanization:

- Reduced health
- Breathing heavily
- Thick irritated skin at the neck for at least 2 weeks
- Rinning eye
- Shoulders seemed enlarged

### After euthanization:

- Could not be taken blood sample (anemic?)
- Enlarged spleen >2 cm
- White lungs
- All legs/shoulders red/svollen
- Red marks on the spine
- Xenograft did not seem to have grown
- Subcutaneous tumor flat over the ribs

### Histology samples:

|              |                            |
|--------------|----------------------------|
| <b>M32X</b>  | Xenograft                  |
| <b>M32TS</b> | Tumor Right Shoulder       |
| <b>M32M</b>  | Milt                       |
| <b>M32LH</b> | Lung and Heart             |
| <b>M32TR</b> | Tumor over ribs right side |
| <b>M32L</b>  | Leg left                   |



Supplementary figure 1-32-4. Score sheets

NTNU

Score sheet FOTS:  
Avdeling for komparativ medisin (AKM)

Responsible researcher:  
Petterson

Animal ID:  
(P19-16) (32) 462pp (2)

| Parameter                                               | State                                        | Assessment scale | Date | Date | Date | Date | Date | Date | Date | Date | Date | Date | Date  |
|---------------------------------------------------------|----------------------------------------------|------------------|------|------|------|------|------|------|------|------|------|------|-------|
| General appearance                                      | Normal                                       | 0                |      |      |      |      |      |      |      |      |      |      |       |
|                                                         | Reduced grooming                             | 1                |      |      |      |      |      |      |      |      |      |      |       |
|                                                         | Minor distention of abdomen, rough hair coat | 3                |      |      |      |      |      |      |      |      |      |      |       |
|                                                         | Hunchback or distended abdomen, inactive     | 18               |      |      |      |      |      |      |      |      |      |      |       |
| Behaviour (Level of activity)                           | Normal                                       | 0                |      |      |      |      |      |      |      |      |      |      |       |
|                                                         | Slightly reduced                             | 1                |      |      |      |      |      |      |      |      |      |      |       |
|                                                         | Moderately reduced                           | 3                |      |      |      |      |      |      |      |      |      |      |       |
|                                                         | Distressed behaviour due to growing tumour   | 3                |      |      |      |      |      |      |      |      |      |      |       |
|                                                         | Obviously reduced                            | 5                |      |      |      |      |      |      |      |      |      |      |       |
| Body weight (Compared to body weight before experiment) | Isolated, inactive, lethargic                | 18               |      |      |      |      |      |      |      |      |      |      |       |
|                                                         | Body weight:                                 |                  | 22,8 |      | 23,8 | 23,8 | 23,1 | 23,4 | 23,4 | 23,6 | 23,5 | 23,5 | 22,38 |
|                                                         | No loss                                      | 0                |      |      |      |      |      |      |      |      |      |      |       |
|                                                         | Loss < 5%                                    | 1                |      |      |      |      |      |      |      |      |      |      |       |
|                                                         | Loss 5-9%                                    | 3                |      |      |      |      |      |      |      |      |      |      |       |
| Clinical signs (Infection, bleeding, discoloration)     | Loss 10-14%                                  | 5                |      |      |      |      |      |      |      |      |      |      |       |
|                                                         | Loss ≥ 15%                                   | 18               |      |      |      |      |      |      |      |      |      |      |       |
|                                                         | Normal                                       | 0                |      |      |      |      |      |      |      |      |      |      |       |
|                                                         | Minor irritation around surgical wound       | 1                |      |      |      |      |      |      |      |      |      |      |       |
|                                                         | Moderate irritation/infected surgical wound  | 3                |      |      |      |      |      |      |      |      |      |      |       |
| Total:                                                  | Infected/open surgical wound                 | 4 *              |      |      |      |      |      |      |      |      |      |      |       |
|                                                         | Tumour > 1.0 cm in diameter                  | 10               |      |      |      |      |      |      |      |      |      |      |       |
|                                                         | Tumour > 1.5 cm in diameter                  | 18               |      |      |      |      |      |      |      |      |      |      |       |
|                                                         | Ulcerous tumour                              | 18               |      |      |      |      |      |      |      |      |      |      |       |
|                                                         | Comments, treatments etc:                    |                  |      |      |      |      |      |      |      |      |      |      |       |

0-3: Normal

4-9: Pay attention to health state and consider treatment

10-13: Pay close attention to health state, consider treatment or euthanasia

14-18: Euthanasia \*Start treatment with antibiotics. If no effect within 3 days, euthanize the animal

NTNU

Score sheet FOTS:  
Avdeling for komparativ medisin (AKM)

Responsible researcher:  
Petterson

Animal ID:  
(P19-16) (32) 462pp (2)

| Parameter                                               | State                                        | Assessment scale | Date | Date | Date | Date | Date | Date | Date | Date | Date | Date | Date |
|---------------------------------------------------------|----------------------------------------------|------------------|------|------|------|------|------|------|------|------|------|------|------|
| General appearance                                      | Normal                                       | 0                |      |      |      |      |      |      |      |      |      |      |      |
|                                                         | Reduced grooming                             | 1                |      |      |      |      |      |      |      |      |      |      |      |
|                                                         | Minor distention of abdomen, rough hair coat | 3                |      |      |      |      |      |      |      |      |      |      |      |
|                                                         | Hunchback or distended abdomen, inactive     | 18               |      |      |      |      |      |      |      |      |      |      |      |
| Behaviour (Level of activity)                           | Normal                                       | 0                |      |      |      |      |      |      |      |      |      |      |      |
|                                                         | Slightly reduced                             | 1                |      |      |      |      |      |      |      |      |      |      |      |
|                                                         | Moderately reduced                           | 3                |      |      |      |      |      |      |      |      |      |      |      |
|                                                         | Distressed behaviour due to growing tumour   | 3                |      |      |      |      |      |      |      |      |      |      |      |
|                                                         | Obviously reduced                            | 5                |      |      |      |      |      |      |      |      |      |      |      |
| Body weight (Compared to body weight before experiment) | Isolated, inactive, lethargic                | 18               |      |      |      |      |      |      |      |      |      |      |      |
|                                                         | Body weight:                                 |                  | 22,3 | 22,3 | 22,6 | 23,7 | 24,5 | 22,3 | 23,6 | 22,7 | 22,5 | 22,6 |      |
|                                                         | No loss                                      | 0                |      |      |      |      |      |      |      |      |      |      |      |
|                                                         | Loss < 5%                                    | 1                |      |      |      |      |      |      |      |      |      |      |      |
|                                                         | Loss 5-9%                                    | 3                |      |      |      |      |      |      |      |      |      |      |      |
| Clinical signs (Infection, bleeding, discoloration)     | Loss 10-14%                                  | 5                |      |      |      |      |      |      |      |      |      |      |      |
|                                                         | Loss ≥ 15%                                   | 18               |      |      |      |      |      |      |      |      |      |      |      |
|                                                         | Normal                                       | 0                |      |      |      |      |      |      |      |      |      |      |      |
|                                                         | Minor irritation around surgical wound       | 1                |      |      |      |      |      |      |      |      |      |      |      |
|                                                         | Moderate irritation/infected surgical wound  | 3                |      |      |      |      |      |      |      |      |      |      |      |
| Total:                                                  | Infected/open surgical wound                 | 4 *              |      |      |      |      |      |      |      |      |      |      |      |
|                                                         | Tumour > 1.0 cm in diameter                  | 10               |      |      |      |      |      |      |      |      |      |      |      |
|                                                         | Tumour > 1.5 cm in diameter                  | 18               |      |      |      |      |      |      |      |      |      |      |      |
|                                                         | Ulcerous tumour                              | 18               |      |      |      |      |      |      |      |      |      |      |      |
|                                                         | Comments, treatments etc:                    |                  |      |      |      |      |      |      |      |      |      |      |      |

0-3: Normal

4-9: Pay attention to health state and consider treatment

10-13: Pay close attention to health state, consider treatment or euthanasia

14-18: Euthanasia \*Start treatment with antibiotics. If no effect within 3 days, euthanize the animal

NTNU

Score sheet FOTS:  
Avdeling for komparativ medisin (AKM)

Responsible researcher:  
Petterson

Animal ID:  
(P19-16) (32) 462pp (2)

| Parameter                                               | State                                        | Assessment scale | Date | Date | Date | Date | Date | Date | Date | Date | Date | Date | Date |
|---------------------------------------------------------|----------------------------------------------|------------------|------|------|------|------|------|------|------|------|------|------|------|
| General appearance                                      | Normal                                       | 0                |      |      |      |      |      |      |      |      |      |      |      |
|                                                         | Reduced grooming                             | 1                |      |      |      |      |      |      |      |      |      |      |      |
|                                                         | Minor distention of abdomen, rough hair coat | 3                |      |      |      |      |      |      |      |      |      |      |      |
|                                                         | Hunchback or distended abdomen, inactive     | 18               |      |      |      |      |      |      |      |      |      |      |      |
| Behaviour (Level of activity)                           | Normal                                       | 0                |      |      |      |      |      |      |      |      |      |      |      |
|                                                         | Slightly reduced                             | 1                |      |      |      |      |      |      |      |      |      |      |      |
|                                                         | Moderately reduced                           | 3                |      |      |      |      |      |      |      |      |      |      |      |
|                                                         | Distressed behaviour due to growing tumour   | 3                |      |      |      |      |      |      |      |      |      |      |      |
|                                                         | Obviously reduced                            | 5                |      |      |      |      |      |      |      |      |      |      |      |
| Body weight (Compared to body weight before experiment) | Isolated, inactive, lethargic                | 18               |      |      |      |      |      |      |      |      |      |      |      |
|                                                         | Body weight:                                 |                  | 22,6 | 23,8 | 23,8 | 21,9 | 23,2 | 24,2 | 22,6 | 23,7 |      |      |      |
|                                                         | No loss                                      | 0                |      |      |      |      |      |      |      |      |      |      |      |
|                                                         | Loss < 5%                                    | 1                |      |      |      |      |      |      |      |      |      |      |      |
|                                                         | Loss 5-9%                                    | 3                |      |      |      |      |      |      |      |      |      |      |      |
| Clinical signs (Infection, bleeding, discoloration)     | Loss 10-14%                                  | 5                |      |      |      |      |      |      |      |      |      |      |      |
|                                                         | Loss ≥ 15%                                   | 18               |      |      |      |      |      |      |      |      |      |      |      |
|                                                         | Normal                                       | 0                |      |      |      |      |      |      |      |      |      |      |      |
|                                                         | Minor irritation around surgical wound       | 1                |      |      |      |      |      |      |      |      |      |      |      |
|                                                         | Moderate irritation/infected surgical wound  | 3                |      |      |      |      |      |      |      |      |      |      |      |
| Total:                                                  | Infected/open surgical wound                 | 4 *              |      |      |      |      |      |      |      |      |      |      |      |
|                                                         | Tumour > 1.0 cm in diameter                  | 10               |      |      |      |      |      |      |      |      |      |      |      |
|                                                         | Tumour > 1.5 cm in diameter                  | 18               |      |      |      |      |      |      |      |      |      |      |      |
|                                                         | Ulcerous tumour                              | 18               |      |      |      |      |      |      |      |      |      |      |      |
|                                                         | Comments, treatments etc:                    |                  |      |      |      |      |      |      |      |      |      |      |      |

0-3: Normal

4-9: Pay attention to health state and consider treatment

10-13: Pay close attention to health state, consider treatment or euthanasia

14-18: Euthanasia \*Start treatment with antibiotics. If no effect within 3 days, euthanize the animal

NTNU

Score sheet FOTS:  
Avdeling for komparativ medisin (AKM)

Responsible researcher:  
Petterson

Animal ID:  
(P19-16) (32) 462pp (2)

| Parameter                                               | State                                        | Assessment scale | Date | Date | Date | Date | Date | Date | Date | Date | Date | Date | Date |
|---------------------------------------------------------|----------------------------------------------|------------------|------|------|------|------|------|------|------|------|------|------|------|
| General appearance                                      | Normal                                       | 0                |      |      |      |      |      |      |      |      |      |      |      |
|                                                         | Reduced grooming                             | 1                |      |      |      |      |      |      |      |      |      |      |      |
|                                                         | Minor distention of abdomen, rough hair coat | 3                |      |      |      |      |      |      |      |      |      |      |      |
|                                                         | Hunchback or distended abdomen, inactive     | 18               |      |      |      |      |      |      |      |      |      |      |      |
| Behaviour (Level of activity)                           | Normal                                       | 0                |      |      |      |      |      |      |      |      |      |      |      |
|                                                         | Slightly reduced                             | 1                |      |      |      |      |      |      |      |      |      |      |      |
|                                                         | Moderately reduced                           | 3                |      |      |      |      |      |      |      |      |      |      |      |
|                                                         | Distressed behaviour due to growing tumour   | 3                |      |      |      |      |      |      |      |      |      |      |      |
|                                                         | Obviously reduced                            | 5                |      |      |      |      |      |      |      |      |      |      |      |
| Body weight (Compared to body weight before experiment) | Isolated, inactive, lethargic                | 18               |      |      |      |      |      |      |      |      |      |      |      |
|                                                         | Body weight:                                 |                  | 24,4 | 24,4 | 23,6 | 23,5 | 24,7 | 24,9 | 24,2 | 23,9 | 24,2 | 24,2 |      |
|                                                         | No loss                                      | 0                |      |      |      |      |      |      |      |      |      |      |      |
|                                                         | Loss < 5%                                    | 1                |      |      |      |      |      |      |      |      |      |      |      |
|                                                         | Loss 5-9%                                    | 3                |      |      |      |      |      |      |      |      |      |      |      |
| Clinical signs (Infection, bleeding, discoloration)     | Loss 10-14%                                  | 5                |      |      |      |      |      |      |      |      |      |      |      |
|                                                         | Loss ≥ 15%                                   | 18               |      |      |      |      |      |      |      |      |      |      |      |
|                                                         | Normal                                       | 0                |      |      |      |      |      |      |      |      |      |      |      |
|                                                         | Minor irritation around surgical wound       | 1                |      |      |      |      |      |      |      |      |      |      |      |
|                                                         | Moderate irritation/infected surgical wound  | 3                |      |      |      |      |      |      |      |      |      |      |      |
| Total:                                                  | Infected/open surgical wound                 | 4 *              |      |      |      |      |      |      |      |      |      |      |      |
|                                                         | Tumour > 1.0 cm in diameter                  | 10               |      |      |      |      |      |      |      |      |      |      |      |
|                                                         | Tumour > 1.5 cm in diameter                  | 18               |      |      |      |      |      |      |      |      |      |      |      |
|                                                         | Ulcerous tumour                              | 18               |      |      |      |      |      |      |      |      |      |      |      |
|                                                         | Comments, treatments etc:                    |                  |      |      |      |      |      |      |      |      |      |      |      |

0-3: Normal

4-9: Pay attention to health state and consider treatment

10-13: Pay close attention to health state, consider treatment or euthanasia

14-18: Euthanasia \*Start treatment with antibiotics. If no effect within 3 days, euthanize the animal

NTNU

Score sheet FOTS:  
Avdeling for komparativ medisin (AKM)

Responsible researcher:  
Petterson

Animal ID:  
(P19-16) (32) 462pp (2)

| Parameter                                               | State                                        | Assessment scale | Date | Date | Date | Date | Date | Date | Date | Date | Date | Date | Date |
|---------------------------------------------------------|----------------------------------------------|------------------|------|------|------|------|------|------|------|------|------|------|------|
| General appearance                                      | Normal                                       | 0                |      |      |      |      |      |      |      |      |      |      |      |
|                                                         | Reduced grooming                             | 1                |      |      |      |      |      |      |      |      |      |      |      |
|                                                         | Minor distention of abdomen, rough hair coat | 3                |      |      |      |      |      |      |      |      |      |      |      |
|                                                         | Hunchback or distended abdomen, inactive     | 18               |      |      |      |      |      |      |      |      |      |      |      |
| Behaviour (Level of activity)                           | Normal                                       | 0                |      |      |      |      |      |      |      |      |      |      |      |
|                                                         | Slightly reduced                             | 1                |      |      |      |      |      |      |      |      |      |      |      |
|                                                         | Moderately reduced                           | 3                |      |      |      |      |      |      |      |      |      |      |      |
|                                                         | Distressed behaviour due to growing tumour   | 3                |      |      |      |      |      |      |      |      |      |      |      |
|                                                         | Obviously reduced                            | 5                |      |      |      |      |      |      |      |      |      |      |      |
| Body weight (Compared to body weight before experiment) | Isolated, inactive, lethargic                | 18               |      |      |      |      |      |      |      |      |      |      |      |
|                                                         | Body weight:                                 |                  | 24,4 | 24,4 | 23,5 | 24,2 | 24,4 | 24,4 | 24,4 | 24,4 | 24,4 | 24,4 |      |
|                                                         | No loss                                      | 0                |      |      |      |      |      |      |      |      |      |      |      |
|                                                         | Loss < 5%                                    | 1                |      |      |      |      |      |      |      |      |      |      |      |
|                                                         | Loss 5-9%                                    | 3                |      |      |      |      |      |      |      |      |      |      |      |
| Clinical signs (Infection, bleeding, discoloration)     | Loss 10-14%                                  | 5                |      |      |      |      |      |      |      |      |      |      |      |
|                                                         | Loss ≥ 15%                                   | 18               |      |      |      |      |      |      |      |      |      |      |      |
|                                                         | Normal                                       | 0                |      |      |      |      |      |      |      |      |      |      |      |
|                                                         | Minor irritation around surgical wound       | 1                |      |      |      |      |      |      |      |      |      |      |      |
|                                                         | Moderate irritation/infected surgical wound  | 3                |      |      |      |      |      |      |      |      |      |      |      |
| Total:                                                  | Infected/open surgical wound                 | 4 *              |      |      |      |      |      |      |      |      |      |      |      |
|                                                         | Tumour > 1.0 cm in diameter                  | 10               |      |      |      |      |      |      |      |      |      |      |      |
|                                                         | Tumour > 1.5 cm in diameter                  | 18               |      |      |      |      |      |      |      |      |      |      |      |
|                                                         | Ulcerous tumour                              | 18               |      |      |      |      |      |      |      |      |      |      |      |
|                                                         | Comments, treatments etc:                    |                  |      |      |      |      |      |      |      |      |      |      |      |

0-3: Normal

4-9: Pay attention to health state and consider treatment

10-13: Pay close attention to health state, consider treatment or euthanasia

14-18: Euthanasia \*Start treatment with antibiotics. If no effect within 3 days, euthanize the animal

Supplementary figure 1-32-5.  
Mouse and xenograft growth curves

Weight curve

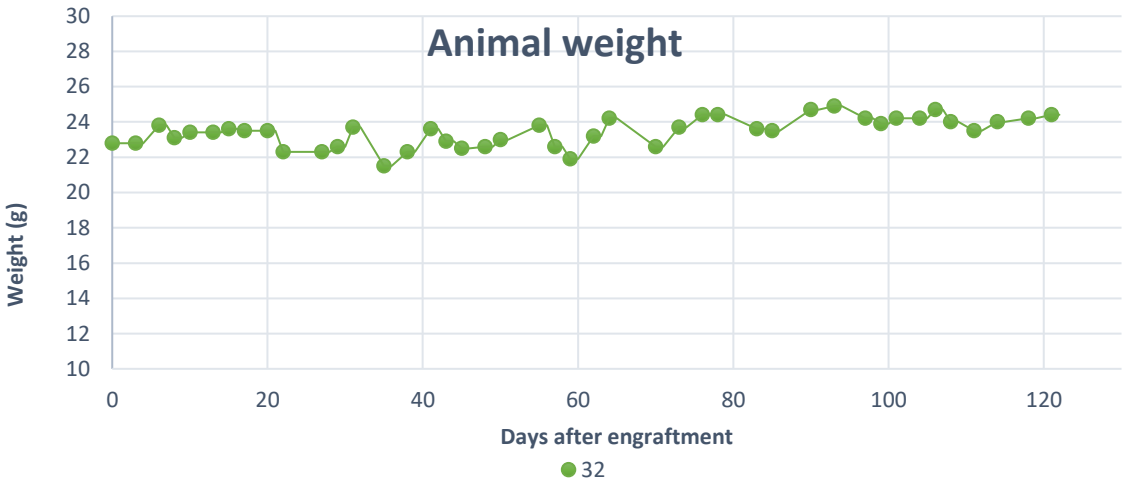

Xenograft growth curve

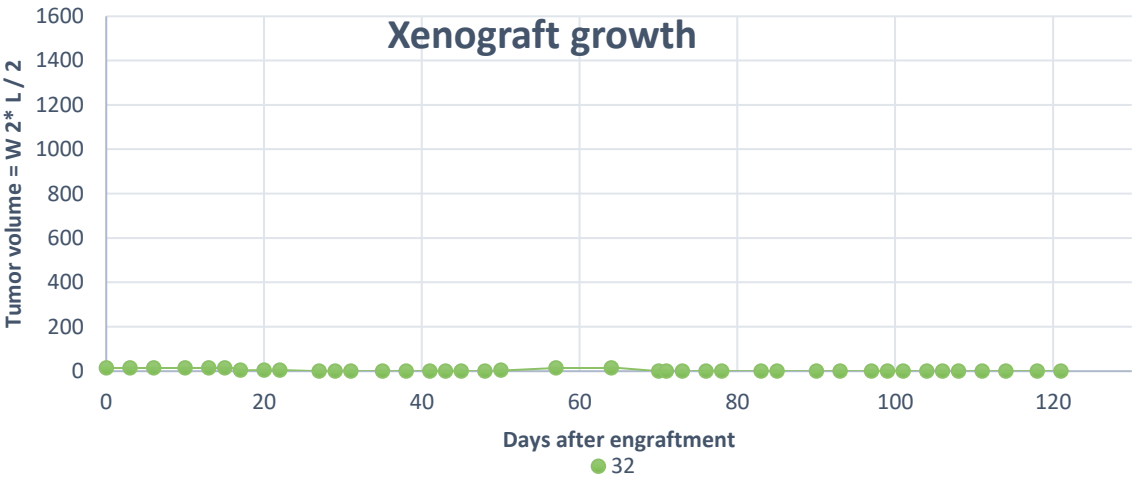

Secondary tumor growth curve

3 secondary tumors found at the day of euthanization.  
Size was not measured.



## Supplementary figure 1-32-6. Histology pictures

M32LH

Page 148

M32X

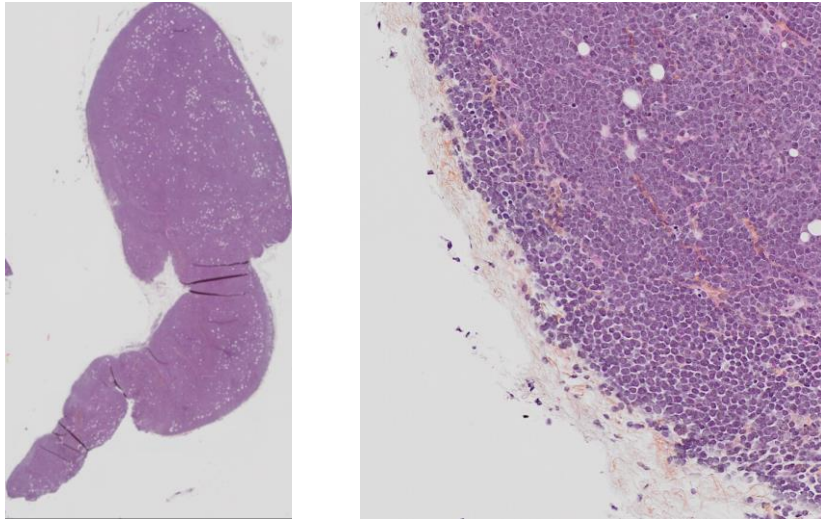

- Xenograft did not grow. During necropsy what was believed to be remainings of the xenograft was sampled. However HES staining showed that it was probably not the xenograft, but another tissue structure.

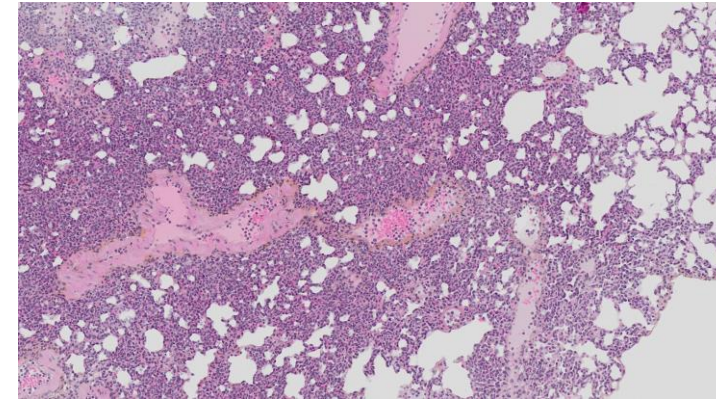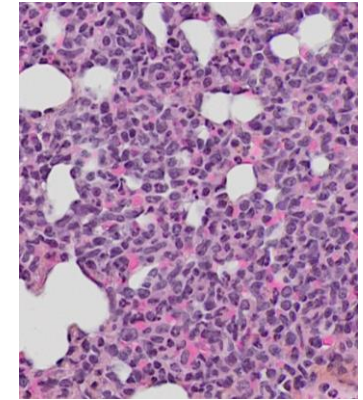

- Dense areas in the lungs consisting of lymphoid cells

M32L

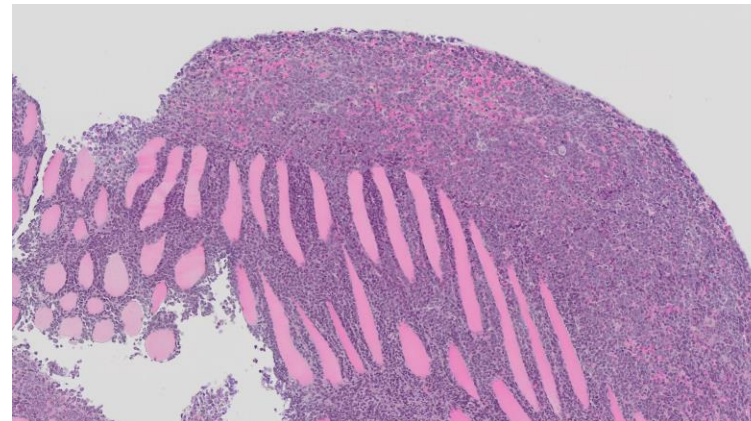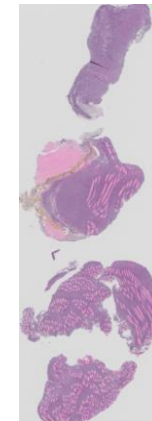

- Red swollen leg
- Lymphoid tumor cells present
- Bone structures



## Supplementary figure 1-32-6. Histology pictures

**M32M**

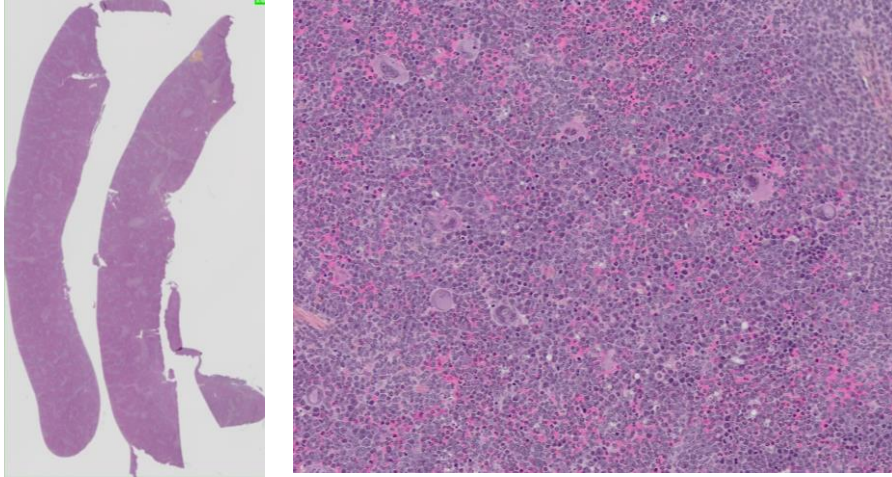

- Large spleen > 2 cm with lymphoid cells

**M32TR – secondary tumor**

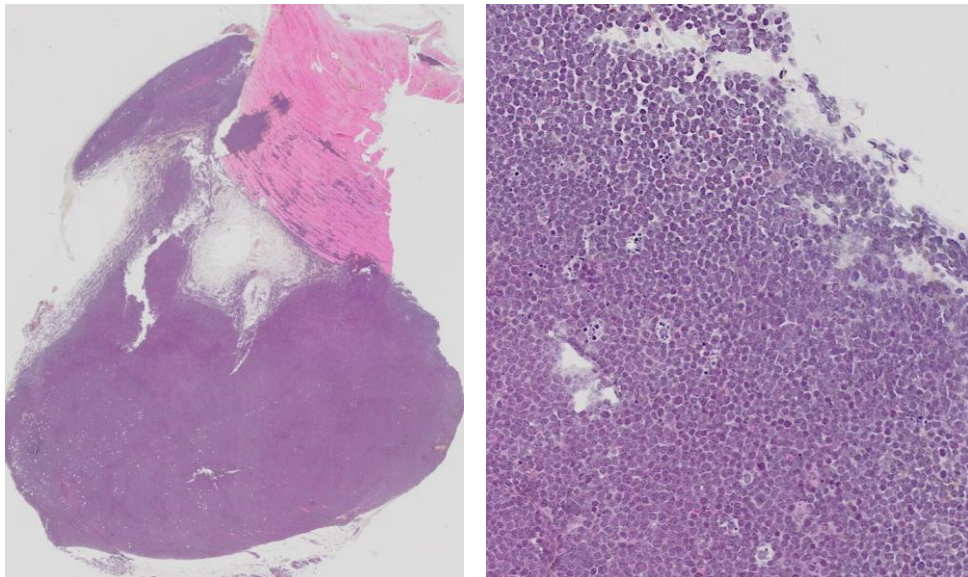

- Lymphoid tumor cells

**M32TS**

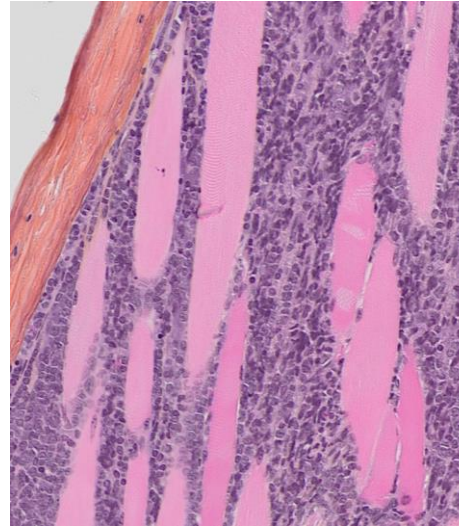

- Ca 1 cm tumor on right shoulder
- Bone structures
- Lymphoid tumor cells



## Supplementary figure 1-32-7. Histology and immunohistochemistry pictures

### M32TR – secondary tumor

- Lymphoma
- IHC staining for human specific Ki67 and CD45 negative
- EBER-ISH staining for EBV negative
- Most likely a mouse tumor

Mouse

HES

Ki67

CD45

EBER-ISH

CD20

#32

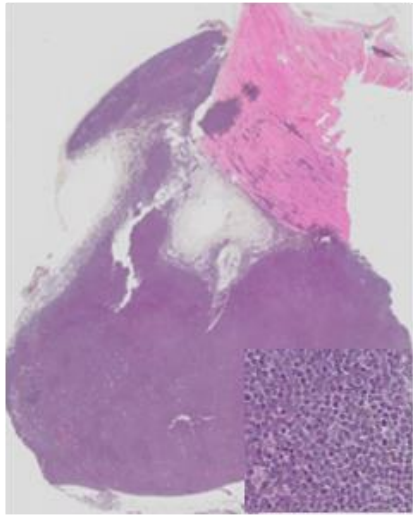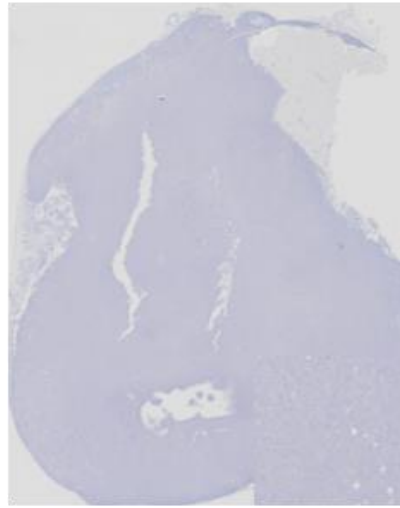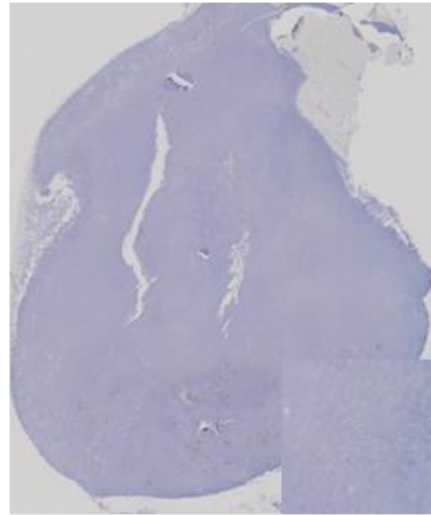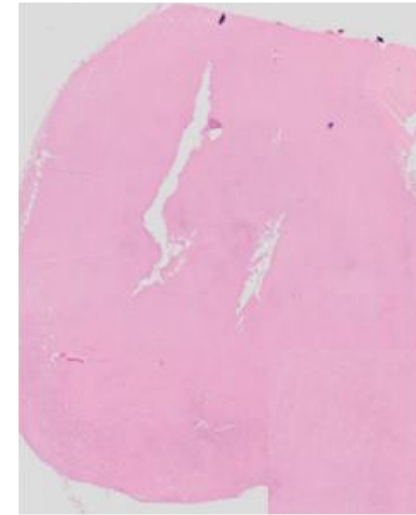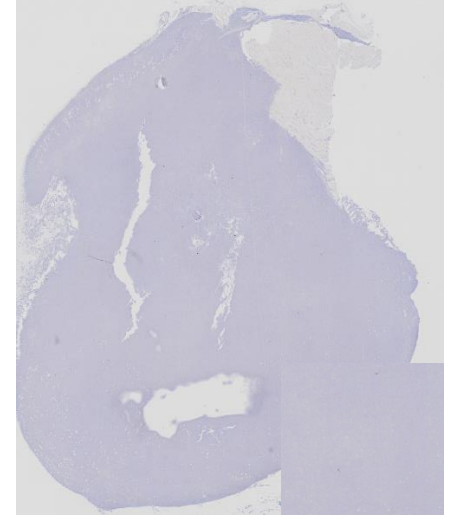

## Mouse 33

- Surgery date: 03.09.19
  - Age (weeks) 33
  - Weight (g) 21.9
  - Tumor fragment P19-2a
  - Fragment size 3 x 3 mm
  - Ear marks 3

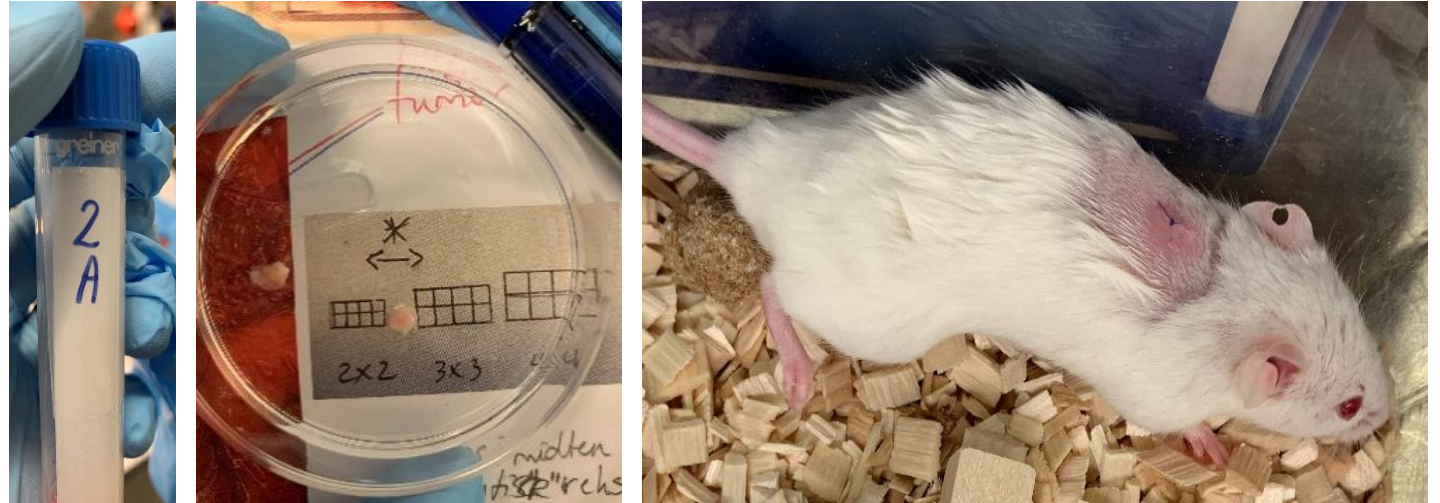

**Supplementary figure 1-33-1.** Pictures from the engraftment day



Supplementary figure 1-33-2. Pictures from follow up and xenograft size measurement

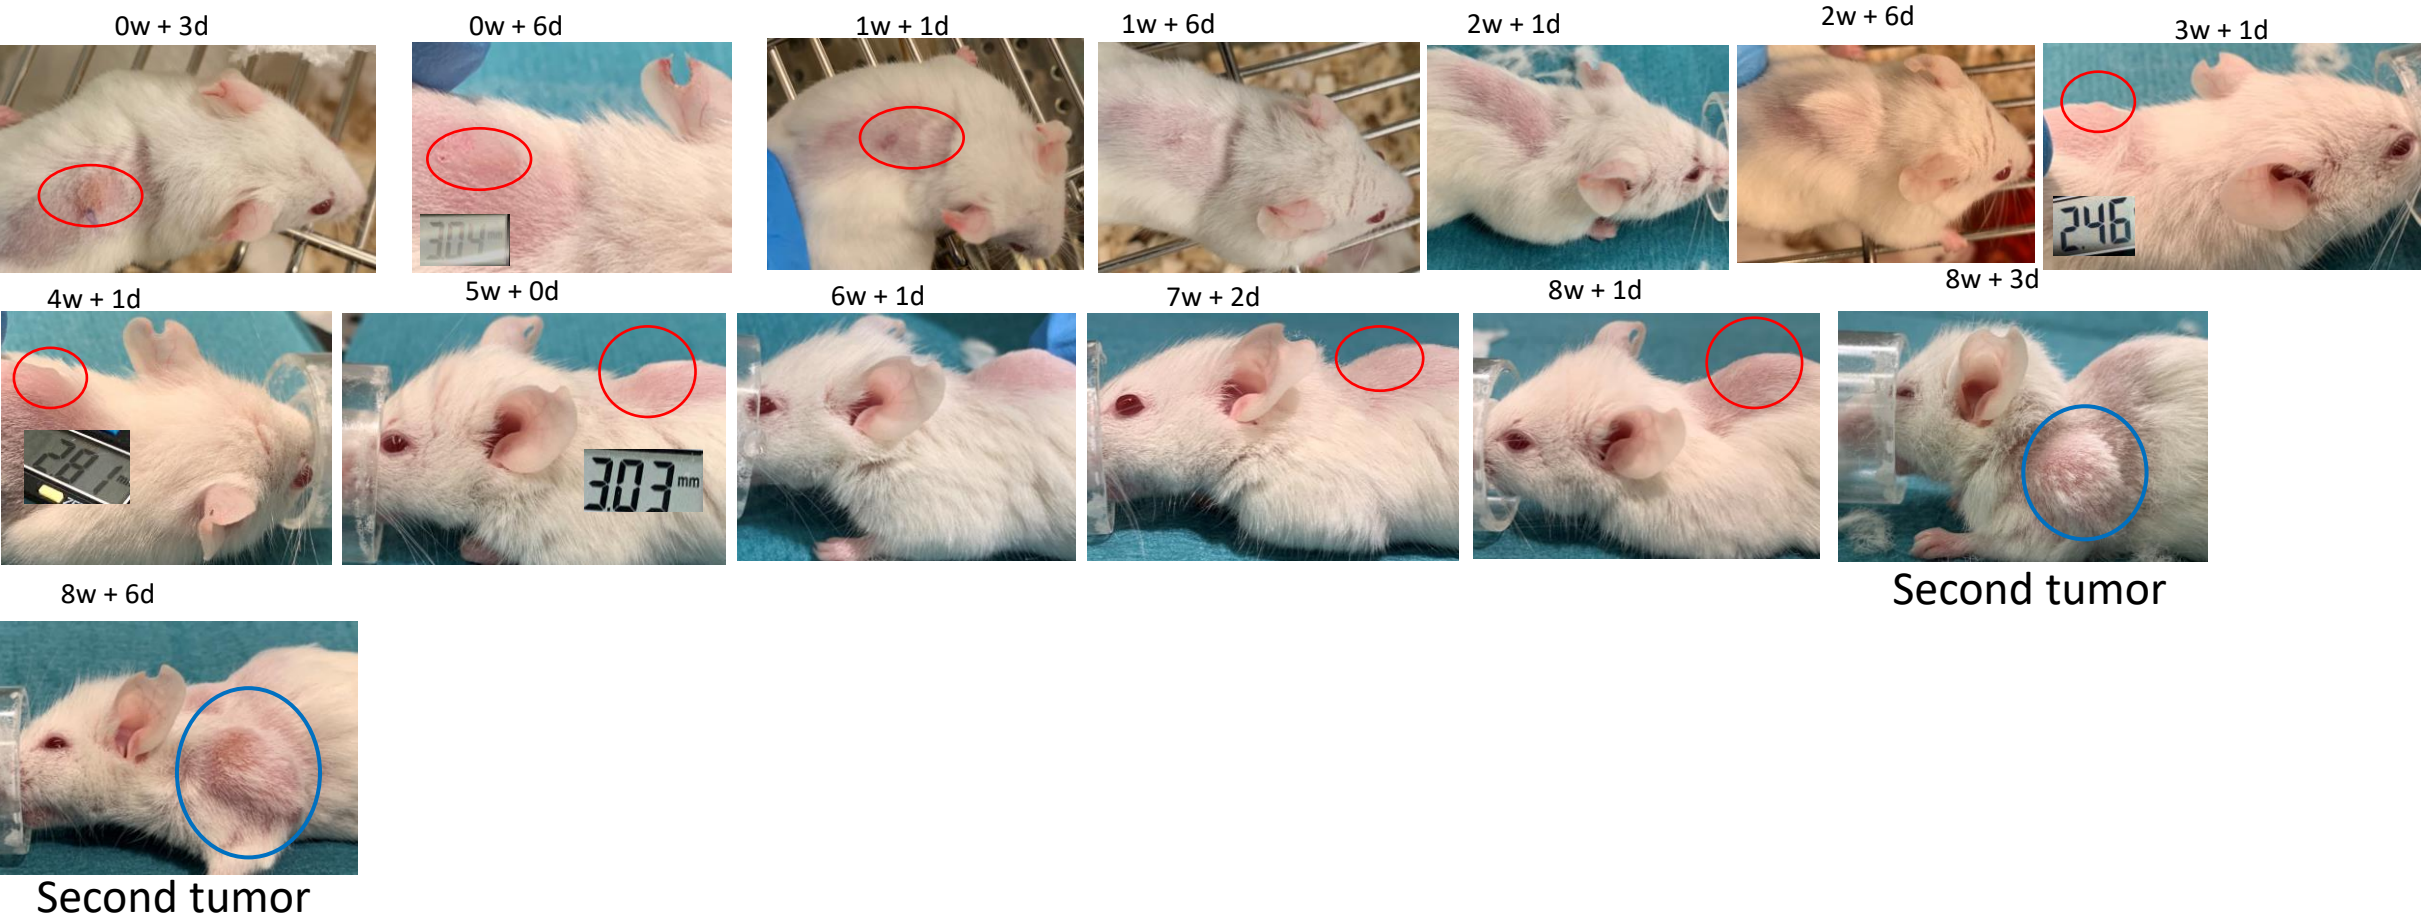

Supplementary figure 1-33-3. Pictures from euthanization (04.11.19)

- No treatment given (xenograft not growing)
- Euthanized due to large secondary tumor before growth of xenograft was established
- Secondary tumor: size: 14 x 9 mm

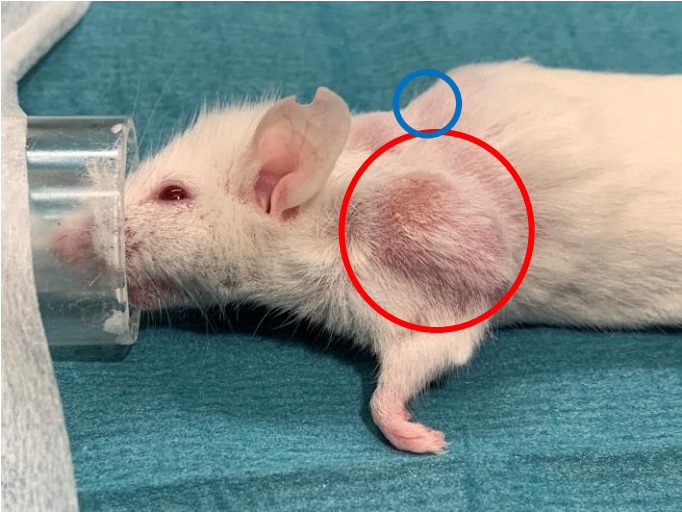

Blue; no visible xenograft  
Red; secondary tumor

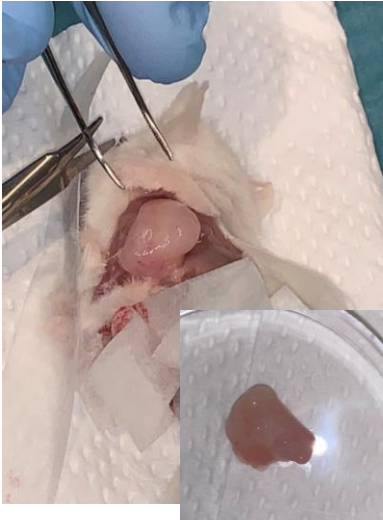

Secondary tumor

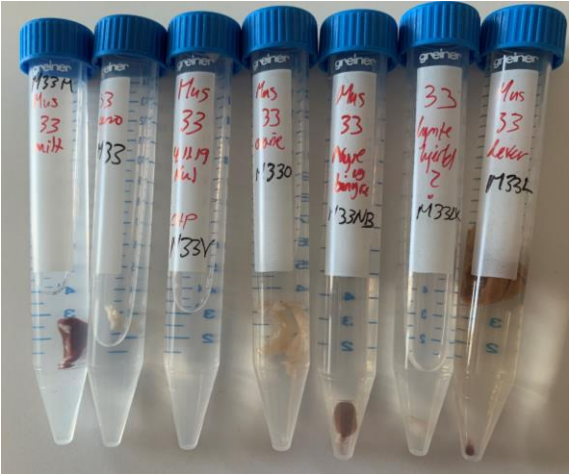

Histology samples

|        |                     |       |
|--------|---------------------|-------|
| Mus 33 |                     |       |
| Mus 33 | xenograft 4.11      | M33   |
| Mus 33 | 4.11.19 Milt        | M33M  |
| Mus 33 | 4.11.19 Kul venstre | M33V  |
| -11-   | ovarie              | M33O  |
| -11-   | nyre og binyre      | M33NB |
| -11-   | lymfekjærl ?        | M33LK |
| -11-   | lever               | M33L  |

Xenograft  
Spleen  
Tumor left  
Ovary  
Kidney  
Lymph node?  
Liver

Naming of histology samples

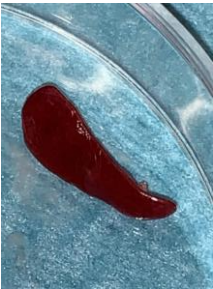

Enlarged spleen

903™ Protein Saver Card  
For Research Use Only  
Not for use in diagnostic procedures

Tuck Cover Here

Name ØMus 33 (P19-2a) Kul

Date 04.11.19 CHP

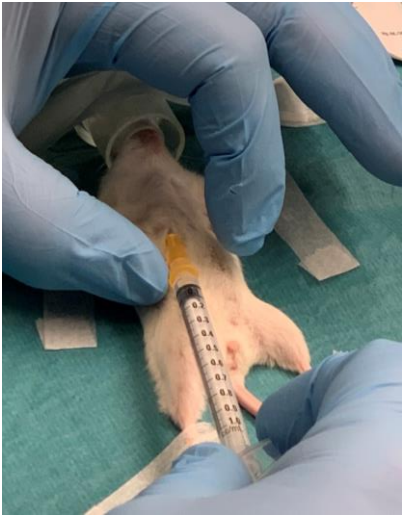

Blood sampling



Supplementary figure 1-33-4. Score sheets

NTNU Score sheet FOTS: Avdeling for komparativ medisin (AKM) Responsible researcher: Pettersen Animal ID: (P19-2a) 33 WUPB 3

| Parameter                                               | State                                        | Assessment scale | Date | Date | Date | Date | Date | Date | Date | Date | Date | Date | Date |
|---------------------------------------------------------|----------------------------------------------|------------------|------|------|------|------|------|------|------|------|------|------|------|
| General appearance                                      | Normal                                       | 0                | 3/9  | 4/9  | 6/9  | 9/9  | 11/9 | 13/9 | 16/9 | 18/9 | 20/9 | 23/9 | 25/9 |
|                                                         | Reduced grooming                             | 1                |      |      |      |      |      |      |      |      |      |      |      |
|                                                         | Minor distention of abdomen, rough hair coat | 3                |      |      |      |      |      |      |      |      |      |      |      |
|                                                         | Hunchback or distended abdomen, inactive     | 18               |      |      |      |      |      |      |      |      |      |      |      |
| Behaviour (Level of activity)                           | Normal                                       | 0                |      |      |      |      |      |      |      |      |      |      |      |
|                                                         | Slightly reduced                             | 1                |      |      |      |      |      |      |      |      |      |      |      |
|                                                         | Moderately reduced                           | 3                |      |      |      |      |      |      |      |      |      |      |      |
|                                                         | Distressed behaviour due to growing tumour   | 3                |      |      |      |      |      |      |      |      |      |      |      |
|                                                         | Obviously reduced                            | 5                |      |      |      |      |      |      |      |      |      |      |      |
| Body weight (Compared to body weight before experiment) | Isolated, inactive, lethargic                | 18               |      |      |      |      |      |      |      |      |      |      |      |
|                                                         | Body weight:                                 |                  | 21.9 |      | 21.7 | 22.5 | 22.6 | 23.0 | 22.6 | 23.2 | 23.5 | 22.6 | 22.3 |
|                                                         | No loss                                      | 0                |      |      |      |      |      |      |      |      |      |      |      |
|                                                         | Loss < 5%                                    | 1                |      |      |      |      |      |      |      |      |      |      |      |
|                                                         | Loss 5-9%                                    | 3                |      |      |      |      |      |      |      |      |      |      |      |
| Clinical signs (Infection, bleeding, discoloration)     | Loss 10-14%                                  | 5                |      |      |      |      |      |      |      |      |      |      |      |
|                                                         | Loss ≥ 15%                                   | 18               |      |      |      |      |      |      |      |      |      |      |      |
|                                                         | Normal                                       | 0                |      |      |      |      |      |      |      |      |      |      |      |
|                                                         | Minor irritation around surgical wound       | 1                |      |      |      |      |      |      |      |      |      |      |      |
|                                                         | Moderate irritation/infected surgical wound  | 3                |      |      |      |      |      |      |      |      |      |      |      |

Comments, treatments etc:

6-3: Normal  
4-9: Pay attention to health state and consider treatment  
10-13: Pay close attention to health state, consider treatment or euthanasia  
14-18: Euthanasia \*Start treatment with antibiotics. If no effect within 3 days, euthanize the animal

NTNU Score sheet FOTS: Avdeling for komparativ medisin (AKM) Responsible researcher: Pettersen Animal ID: (P19-2a) 33 WUPB 3

| State                                        | Assessment scale | Date | Date | Date | Date | Date | Date  | Date  | Date  | Date  | Date  | Date | Date |
|----------------------------------------------|------------------|------|------|------|------|------|-------|-------|-------|-------|-------|------|------|
| Normal                                       | 0                | 25/9 | 30/9 | 2/10 | 4/10 | 8/10 | 11/10 | 14/10 | 16/10 | 18/10 | 21/10 |      |      |
| Reduced grooming                             | 1                |      |      |      |      |      |       |       |       |       |       |      |      |
| Minor distention of abdomen, rough hair coat | 3                |      |      |      |      |      |       |       |       |       |       |      |      |
| Hunchback or distended abdomen, inactive     | 18               |      |      |      |      |      |       |       |       |       |       |      |      |
| Normal                                       | 0                |      |      |      |      |      |       |       |       |       |       |      |      |
| Slightly reduced                             | 1                |      |      |      |      |      |       |       |       |       |       |      |      |
| Moderately reduced                           | 3                |      |      |      |      |      |       |       |       |       |       |      |      |
| Distressed behaviour due to growing tumour   | 3                |      |      |      |      |      |       |       |       |       |       |      |      |
| Obviously reduced                            | 5                |      |      |      |      |      |       |       |       |       |       |      |      |
| Isolated, inactive, lethargic                | 18               |      |      |      |      |      |       |       |       |       |       |      |      |
| Body weight:                                 |                  | 22.3 | 22.3 | 22.5 | 22.3 | 22   | 21.6  | 22.1  | 21.6  | 22.1  | 22.9  |      |      |
| No loss                                      | 0                |      |      |      |      |      |       |       |       |       |       |      |      |
| Loss < 5%                                    | 1                |      |      |      |      |      |       |       |       |       |       |      |      |
| Loss 5-9%                                    | 3                |      |      |      |      |      |       |       |       |       |       |      |      |
| Loss 10-14%                                  | 5                |      |      |      |      |      |       |       |       |       |       |      |      |
| Loss ≥ 15%                                   | 18               |      |      |      |      |      |       |       |       |       |       |      |      |
| Normal                                       | 0                |      |      |      |      |      |       |       |       |       |       |      |      |
| Minor irritation around surgical wound       | 1                |      |      |      |      |      |       |       |       |       |       |      |      |
| Moderate irritation/infected surgical wound  | 3                |      |      |      |      |      |       |       |       |       |       |      |      |
| Infected/open surgical wound                 | 4 *              |      |      |      |      |      |       |       |       |       |       |      |      |
| Tumour > 1.0 cm in diameter                  | 10               |      |      |      |      |      |       |       |       |       |       |      |      |
| Tumour > 1.5 cm in diameter                  | 18               |      |      |      |      |      |       |       |       |       |       |      |      |
| Ulcerous tumour                              | 18               |      |      |      |      |      |       |       |       |       |       |      |      |
| Total:                                       |                  |      |      |      |      |      |       |       |       |       |       |      |      |
| Comments, treatments etc:                    |                  |      |      |      |      |      |       |       |       |       |       |      |      |

NTNU Score sheet FOTS: Avdeling for komparativ medisin (AKM) Responsible researcher: Pettersen Animal ID: (P19-2a) 33 WUPB 3

| Parameter                                               | State                                        | Assessment scale | Date | Date  | Date  | Date  | Date | Date | Date | Date | Date | Date | Date |
|---------------------------------------------------------|----------------------------------------------|------------------|------|-------|-------|-------|------|------|------|------|------|------|------|
| General appearance                                      | Normal                                       | 0                | 2/10 | 23/10 | 28/10 | 30/10 | 1/11 | 4/11 |      |      |      |      |      |
|                                                         | Reduced grooming                             | 1                |      |       |       |       |      |      |      |      |      |      |      |
|                                                         | Minor distention of abdomen, rough hair coat | 3                |      |       |       |       |      |      |      |      |      |      |      |
|                                                         | Hunchback or distended abdomen, inactive     | 18               |      |       |       |       |      |      |      |      |      |      |      |
| Behaviour (Level of activity)                           | Normal                                       | 0                |      |       |       |       |      |      |      |      |      |      |      |
|                                                         | Slightly reduced                             | 1                |      |       |       |       |      |      |      |      |      |      |      |
|                                                         | Moderately reduced                           | 3                |      |       |       |       |      |      |      |      |      |      |      |
|                                                         | Distressed behaviour due to growing tumour   | 3                |      |       |       |       |      |      |      |      |      |      |      |
|                                                         | Obviously reduced                            | 5                |      |       |       |       |      |      |      |      |      |      |      |
| Body weight (Compared to body weight before experiment) | Isolated, inactive, lethargic                | 18               |      |       |       |       |      |      |      |      |      |      |      |
|                                                         | Body weight:                                 |                  | 22.9 | 22.4  | 22.4  | 21.8  | 22.4 | 22.3 |      |      |      |      |      |
|                                                         | No loss                                      | 0                |      |       |       |       |      |      |      |      |      |      |      |
|                                                         | Loss < 5%                                    | 1                |      |       |       |       |      |      |      |      |      |      |      |
|                                                         | Loss 5-9%                                    | 3                |      |       |       |       |      |      |      |      |      |      |      |
| Clinical signs (Infection, bleeding, discoloration)     | Loss 10-14%                                  | 5                |      |       |       |       |      |      |      |      |      |      |      |
|                                                         | Loss ≥ 15%                                   | 18               |      |       |       |       |      |      |      |      |      |      |      |
|                                                         | Normal                                       | 0                |      |       |       |       |      |      |      |      |      |      |      |
|                                                         | Minor irritation around surgical wound       | 1                |      |       |       |       |      |      |      |      |      |      |      |
|                                                         | Moderate irritation/infected surgical wound  | 3                |      |       |       |       |      |      |      |      |      |      |      |

Comments, treatments etc:

6-3: Normal  
4-9: Pay attention to health state and consider treatment  
10-13: Pay close attention to health state, consider treatment or euthanasia  
14-18: Euthanasia \*Start treatment with antibiotics. If no effect within 3 days, euthanize the animal

**Supplementary figure 1-33-5.**  
Mouse, xenograft and secondary  
tumor growth curves

Weight curve

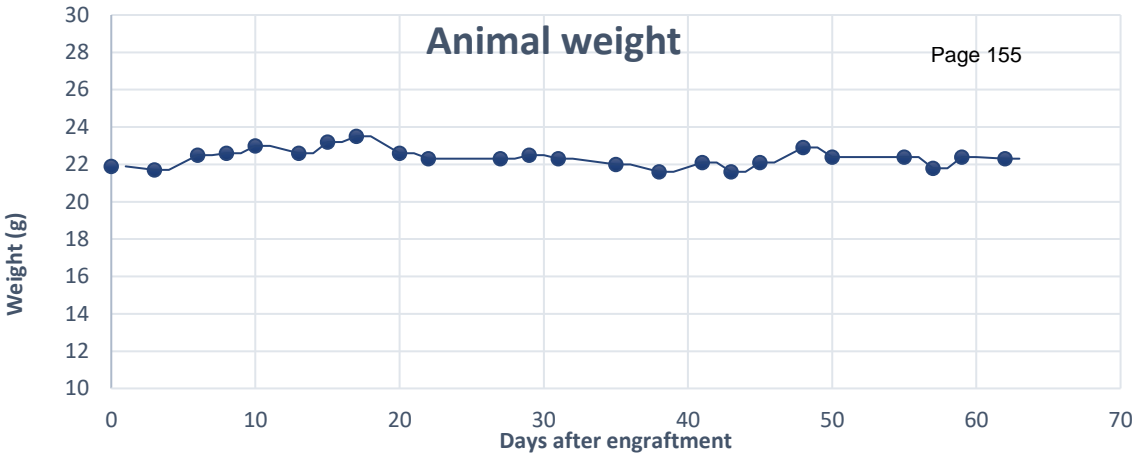

Xenograft growth curve

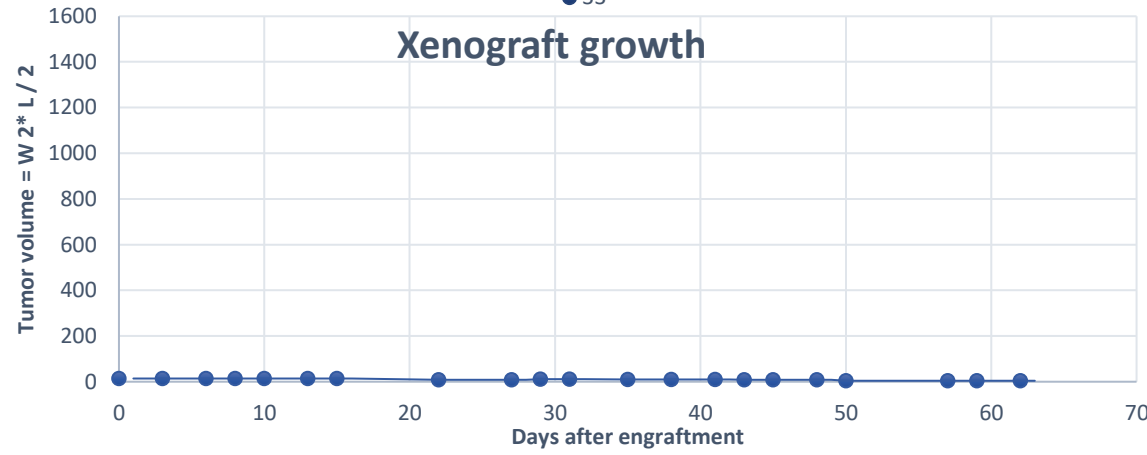

Secondary tumor growth curve

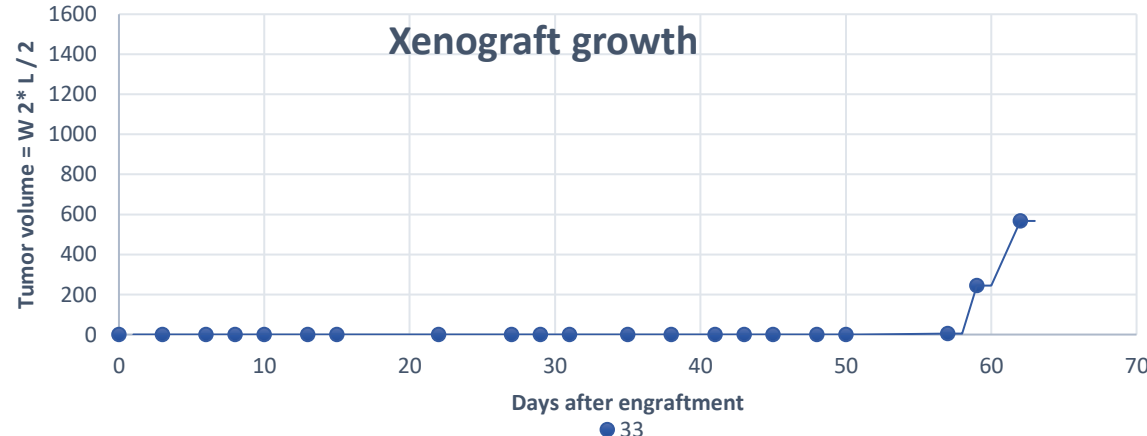



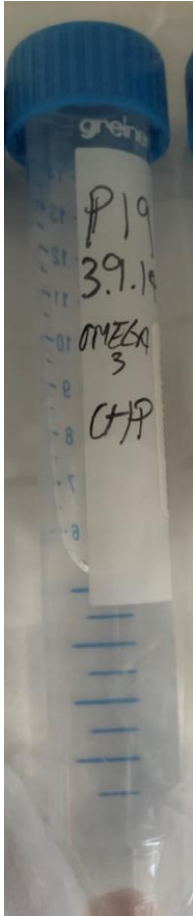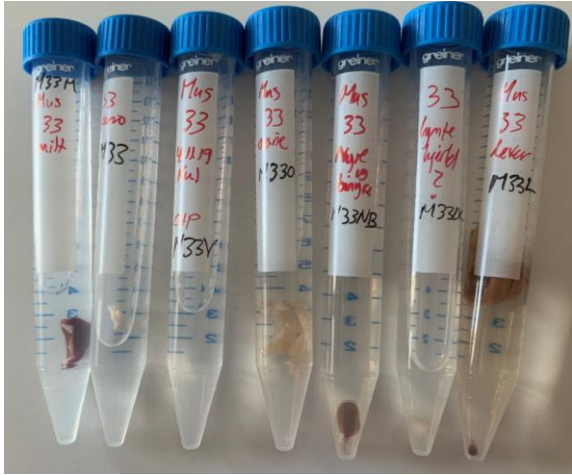

Histology samples

|        |                    |       |
|--------|--------------------|-------|
| Mus 33 |                    |       |
| Mus 33 | xenograft 4.11     | M33   |
| Mus 33 | 4.11.19 Milt       | M33M  |
| Mus 33 | 4.11.19 Kulvenstre | M33V  |
| -  -   | ovarie             | M330  |
| -  -   | nyreog binyre      | M33NB |
| -  -   | lymfelysterel ?    | M33LK |
| -  -   | lever              | M33L  |

- Xenograft
- Spleen
- Tumor left
- Ovary
- Kidney
- Lymph node?
- Liver

Naming of histology samples

M33X

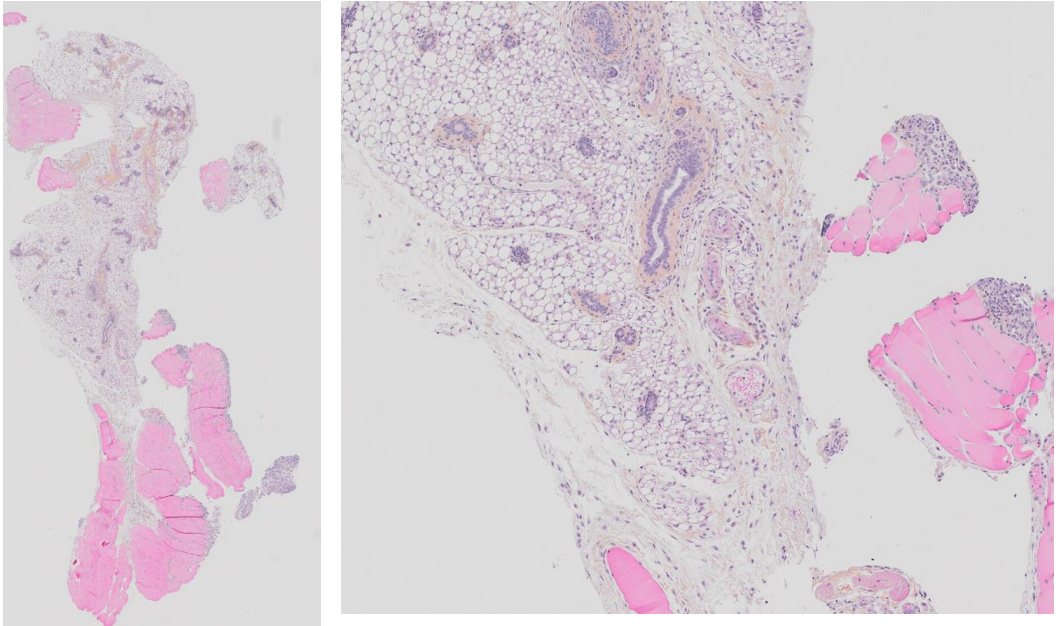

•Probably not the xenograft due to most muscle cells surrounded by muscle and connective tissue and lymphoid tumor cells, but not epithelial cells as in the colon



## Supplementary figure 1-33-6. Histology pictures

### M33M (spleen)

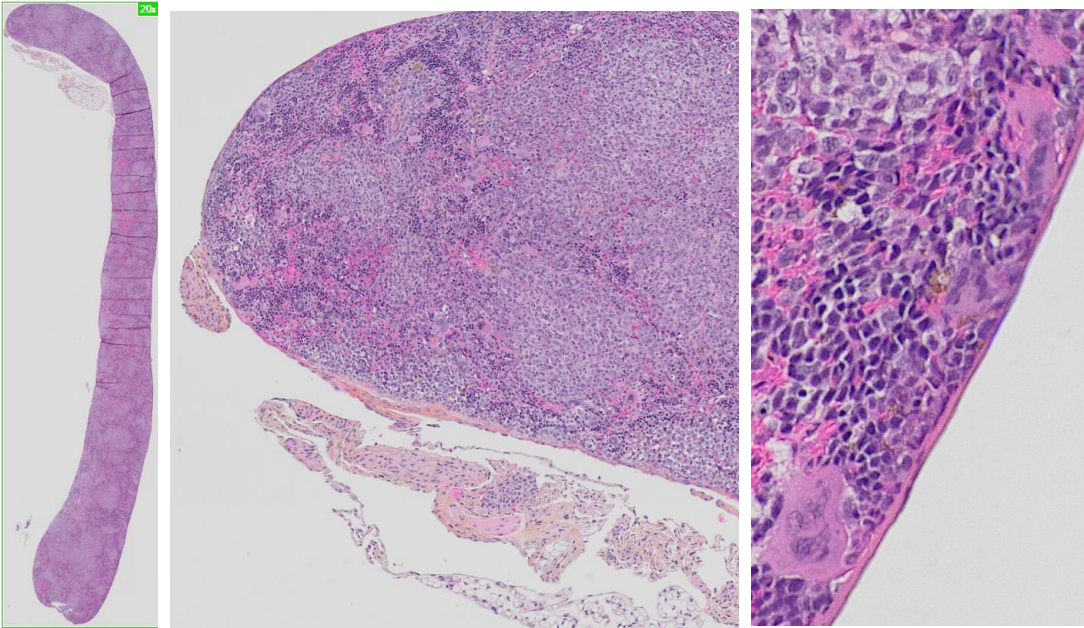

- Plenty lymphoid tumor cells in the spleen
- Measured on 1.3 cm on the slide, 2.56 cm calculated from picture of spleen in petri dish after euthanization
- Red areas with possible bleedings
- Can see macrophages, giant cells/ghost cells

### M33V (tumor left shoulder)

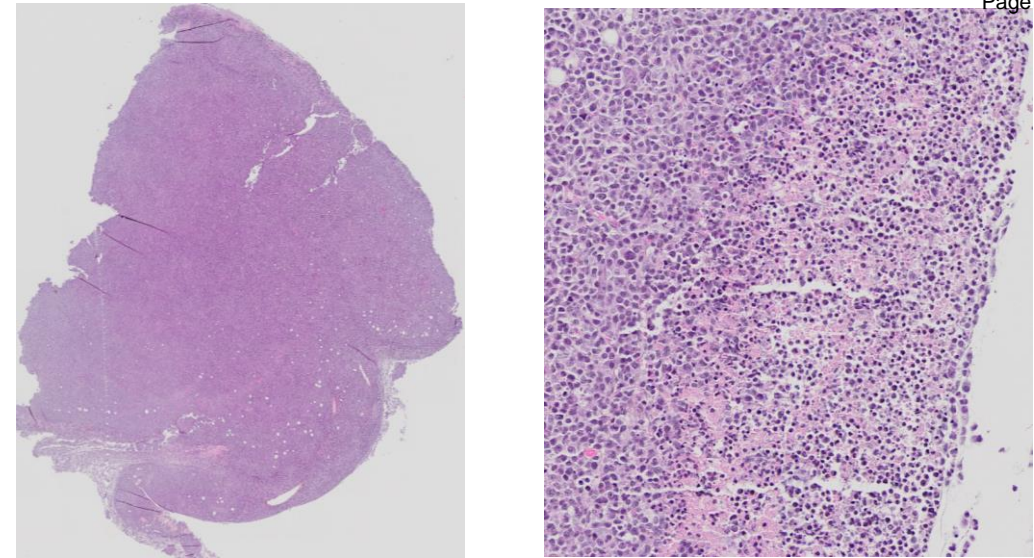

- Plenty lymphoid tumor cells packed dense together
- Smaller areas with necrosis

### M33LK (lymph node?)

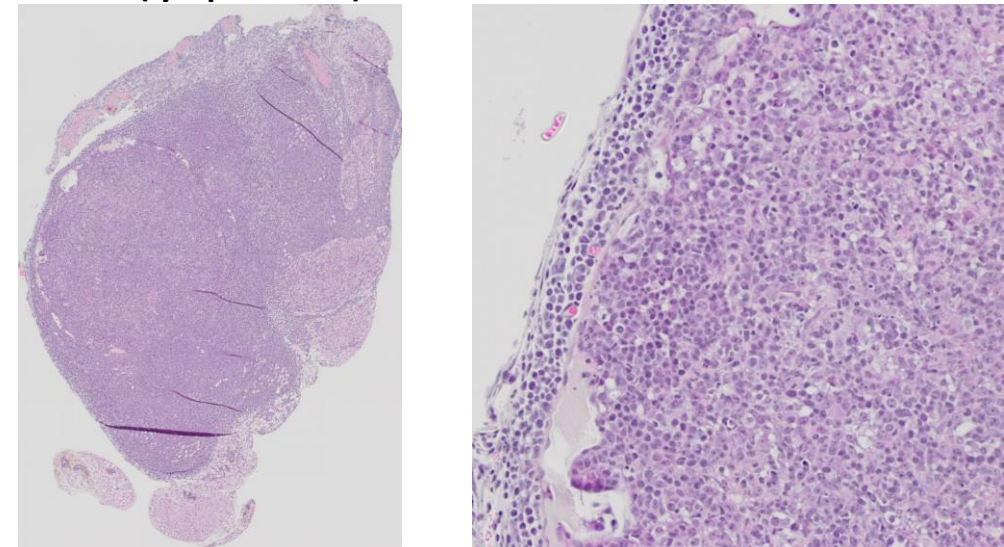

- Plenty lymphoid tumor cells densely packed together



## Supplementary figure 1-33-7. Histology and immunohistochemistry pictures

Page 158

### M33V (tumor left shoulder)

-IHC staining for Ki67 and CD45

-EBER-ISH staining for EBV

Mouse

HES

Ki67

CD45

EBER-ISH

#33

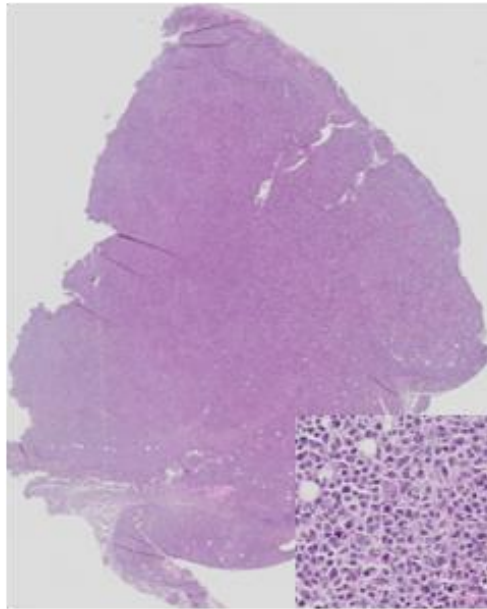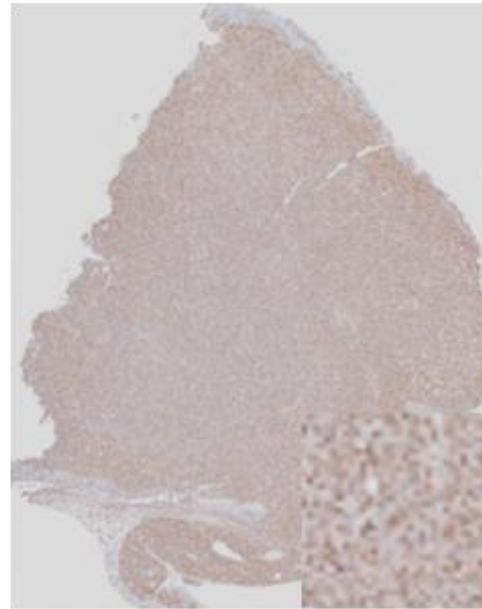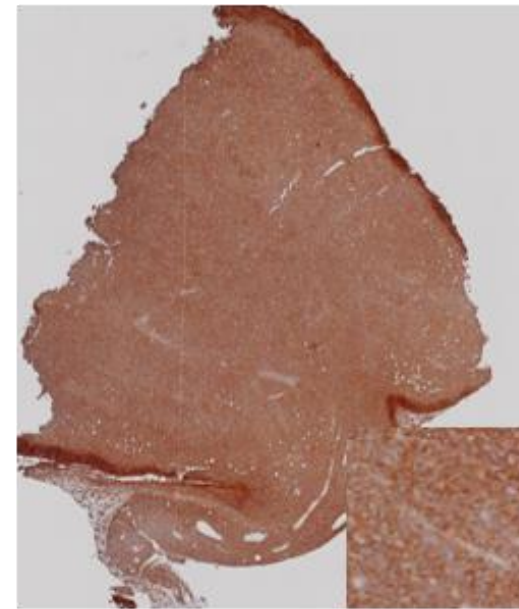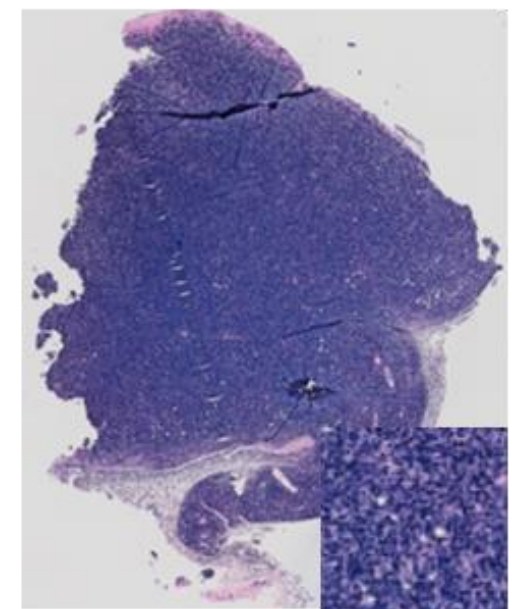

## Supplementary file 2

| Date:                                                                                                                                                                                                                                                                                                                                                                                                                                                             | Mouse nr: | Tumor:                                                                      | Patient: |
|-------------------------------------------------------------------------------------------------------------------------------------------------------------------------------------------------------------------------------------------------------------------------------------------------------------------------------------------------------------------------------------------------------------------------------------------------------------------|-----------|-----------------------------------------------------------------------------|----------|
| <b>Heating chamber 37°C</b>                                                                                                                                                                                                                                                                                                                                                                                                                                       |           | HiBiscrub, Klorhexidin, 4xNaCl                                              |          |
| Wash surface areas with ethanol                                                                                                                                                                                                                                                                                                                                                                                                                                   |           |                                                                             |          |
| Heating pad 37°C                                                                                                                                                                                                                                                                                                                                                                                                                                                  |           |                                                                             |          |
| <b>Weight</b>                                                                                                                                                                                                                                                                                                                                                                                                                                                     |           |                                                                             |          |
| Anasthesia chamber                                                                                                                                                                                                                                                                                                                                                                                                                                                |           | N <sub>2</sub> O <sub>2</sub> 60 % - O <sub>2</sub> 40 % - Isofluran 2%     |          |
| Anasthesia mask                                                                                                                                                                                                                                                                                                                                                                                                                                                   |           | N <sub>2</sub> O <sub>2</sub> 60 % - O <sub>2</sub> 20 % - Isofluran 1.5-2% |          |
| <b>Eye gel</b>                                                                                                                                                                                                                                                                                                                                                                                                                                                    |           |                                                                             |          |
| <b>Ear mark</b>                                                                                                                                                                                                                                                                                                                                                                                                                                                   |           |                                                                             |          |
| Shaving                                                                                                                                                                                                                                                                                                                                                                                                                                                           |           |                                                                             |          |
| Change surgery tissue                                                                                                                                                                                                                                                                                                                                                                                                                                             |           |                                                                             |          |
| Fixate feet with tape                                                                                                                                                                                                                                                                                                                                                                                                                                             |           |                                                                             |          |
| <b>Metacam – systemic anesthesia (~0.1 ml)</b>                                                                                                                                                                                                                                                                                                                                                                                                                    |           | Orange canyle                                                               |          |
| Wash surgery area: HiBiscrub                                                                                                                                                                                                                                                                                                                                                                                                                                      |           |                                                                             |          |
| Wash surgery area: Chlorhexidine                                                                                                                                                                                                                                                                                                                                                                                                                                  |           |                                                                             |          |
| <b>Marcain – local anesthesia (~0.08 ml)</b>                                                                                                                                                                                                                                                                                                                                                                                                                      |           | Yellow canyle                                                               |          |
| Pinch foot with forceps                                                                                                                                                                                                                                                                                                                                                                                                                                           |           |                                                                             |          |
| Make a cut with scalpel                                                                                                                                                                                                                                                                                                                                                                                                                                           |           |                                                                             |          |
| Use sizzors to make a pocket under the skin                                                                                                                                                                                                                                                                                                                                                                                                                       |           |                                                                             |          |
| <b>Flush tumor fragment with NaCl</b>                                                                                                                                                                                                                                                                                                                                                                                                                             |           |                                                                             |          |
| Stich the wound                                                                                                                                                                                                                                                                                                                                                                                                                                                   |           |                                                                             |          |
| Take a picture of the mouse/surgery area                                                                                                                                                                                                                                                                                                                                                                                                                          |           |                                                                             |          |
| <b>Exuipment:</b><br>Eye gel<br>Heating pad<br>2 x Sterile surgery tissues<br>HiBiscrub<br>Chlorhexidine<br>Autoclaved surgery instruments (2 x forceps, 2 x sizzors, Suture instruments)<br>2 x Scalpels<br>4 x sutures (nr 5)<br>8 x 1 ml syringe + 8 x yellow canyle<br>2 x white plastic dish for HiBiscrub and ethanolS<br>Sterilizer for surgery instruments between animals<br>Sterile q tips<br>Tape<br>Ear mark instrument<br>NaCl<br>Metacam<br>Marcain |           | Comments:                                                                   |          |
| <b>Performed by:</b> _____                                                                                                                                                                                                                                                                                                                                                                                                                                        |           |                                                                             |          |

Supplementary figure 2-1. Bullet point form for surgery



Sample: Surgery/Anesthetic Log

| Date   | Client ID | Animal ID | Species & Breed | Age | Sex | Weight (kg) | Patient Status | Anesthetic Regimes (Name/Dose/Route) |         |                                                   | Procedure | Time (min.) |    | Veterinarian |
|--------|-----------|-----------|-----------------|-----|-----|-------------|----------------|--------------------------------------|---------|---------------------------------------------------|-----------|-------------|----|--------------|
|        |           |           |                 |     |     |             |                | Pre-Op                               | Post-Op | Maintenance                                       |           | Anes.       | Sx |              |
| 11/3   |           | 1         | CIEANOS         |     | F   | 20g         |                |                                      |         | metacam 0.1ml<br>morgain 0.008ml<br>isoflurane 2% |           |             |    | Knut         |
| 12/3   |           | 1         | CIEANOS         |     | F   | 20g         |                |                                      |         | metacam 0.1ml<br>morgain 0.008ml<br>isoflurane 2% |           |             |    | Knut         |
| 25/3   |           | 1         | CIEANOS         |     | F   | ca 20g      |                |                                      |         | metacam 0.1ml<br>morgain 0.008ml<br>isoflurane 2% |           |             |    | Knut         |
| 25/3   |           | 1         | CIEANOS         |     | F   | ca 20g      |                |                                      |         | metacam 0.1ml<br>morgain 0.008ml<br>isoflurane 2% |           |             |    | Knut         |
| 26/3   |           | 1         | CIEANOS         |     | F   | ca 20g      |                |                                      |         | metacam 0.1ml<br>morgain 0.008ml<br>isoflurane 2% |           |             |    | Knut         |
| 26/3   |           | 1         | CIEANOS         |     | F   | ca 20g      |                |                                      |         | metacam 0.1ml<br>morgain 0.008ml<br>isoflurane 2% |           |             |    | Knut         |
| 1/4-19 |           | 12        | CIEANOS         |     | F   | 20.5g       |                |                                      |         | metacam 0.1ml<br>morgain 0.008ml<br>isoflurane 2% |           |             |    | Knut/Helle   |
| 1/4-19 |           | 2         | CIEANOS         |     | F   | 18.5g       |                |                                      |         | metacam 0.1ml<br>morgain 0.008ml<br>isoflurane 2% |           |             |    | Knut/Helle   |
| 1/4-19 |           | 3         | CIEANOS         |     | F   | 18.15g      |                |                                      |         | metacam 0.1ml<br>morgain 0.008ml<br>isoflurane 2% |           |             |    | Knut/Helle   |
| 1/4-19 |           | 4         | CIEANOS         |     | F   | 18.35g      |                |                                      |         | metacam 0.1ml<br>morgain 0.008ml<br>isoflurane 2% |           |             |    | Knut/Helle   |
| 1/4-19 |           | 19 (1)    | CIEANOS         |     | F   | 20.62g      |                |                                      |         | metacam 0.1ml<br>morgain 0.008ml<br>isoflurane 2% |           |             |    | Caroline     |
| "      |           | 20 (2)    | CIEANOS         |     | F   | 24.63       |                |                                      |         | metacam 0.1ml<br>morgain 0.008ml<br>isoflurane 2% |           |             |    | Helle        |
| "      |           | 21 (3)    | CIEANOS         |     | F   | 20.3        |                |                                      |         | metacam 0.1ml<br>morgain 0.008ml<br>isoflurane 2% |           |             |    | Helle        |
| "      |           | 22 (4)    | CIEANOS         |     | F   | 21.2        |                |                                      |         | metacam 0.1ml<br>morgain 0.008ml<br>isoflurane 2% |           |             |    | Caroline     |
| "      |           | 21 (3)    | CIEANOS         |     | F   |             |                |                                      |         | metacam 0.1ml<br>morgain 0.008ml<br>isoflurane 2% |           |             |    | Caroline     |
| "      |           | 22 (4)    | CIEANOS         |     | F   |             |                |                                      |         | metacam 0.1ml<br>morgain 0.008ml<br>isoflurane 2% |           |             |    | Caroline     |
| "      |           | 19 (1)    | CIEANOS         |     | F   |             |                |                                      |         | metacam 0.1ml<br>morgain 0.008ml<br>isoflurane 2% |           |             |    | Caroline     |

Sample: Surgery/Anesthetic Log

| Date    | Client ID | Animal ID | Species & Breed | Age | Sex | Weight (kg) | Patient Status | Anesthetic Regimes (Name/Dose/Route)              |         |             | Procedure | Time (min.) |    | Veterinarian   |
|---------|-----------|-----------|-----------------|-----|-----|-------------|----------------|---------------------------------------------------|---------|-------------|-----------|-------------|----|----------------|
|         |           |           |                 |     |     |             |                | Pre-Op                                            | Post-Op | Maintenance |           | Anes.       | Sx |                |
| 20/8/19 |           | 23 (1)    | CIEANOS         | 7m  | F   | 24g         | pinpoint       | metacam 0.1ml<br>morgain 0.008ml<br>isoflurane 2% |         | post-op 24h | PDX       | ca 20min    |    | Helle/Karoline |
| "       |           | 24 (2)    | CIEANOS         | "   | "   | "           | OK             | metacam 0.1ml<br>morgain 0.008ml<br>isoflurane 2% |         | post-op 24h | PDX       | "           | "  | "              |
| "       |           | 25 (3)    | CIEANOS         | "   | "   | "           | "              | metacam 0.1ml<br>morgain 0.008ml<br>isoflurane 2% |         | post-op 24h | PDX       | "           | "  | "              |
| "       |           | 26 (4)    | CIEANOS         | "   | "   | "           | "              | metacam 0.1ml<br>morgain 0.008ml<br>isoflurane 2% |         | post-op 24h | PDX       | "           | "  | "              |
| 21/8/19 |           | 27 (1)    | CIEANOS         | "   | "   | "           | "              | metacam 0.1ml<br>morgain 0.008ml<br>isoflurane 2% |         | post-op 24h | PDX       | "           | "  | "              |
| "       |           | 28 (2)    | CIEANOS         | "   | "   | "           | "              | metacam 0.1ml<br>morgain 0.008ml<br>isoflurane 2% |         | post-op 24h | PDX       | "           | "  | "              |
| "       |           | 29 (3)    | CIEANOS         | "   | "   | "           | "              | metacam 0.1ml<br>morgain 0.008ml<br>isoflurane 2% |         | post-op 24h | PDX       | "           | "  | "              |
| "       |           | 30 (4)    | CIEANOS         | "   | "   | "           | "              | metacam 0.1ml<br>morgain 0.008ml<br>isoflurane 2% |         | post-op 24h | PDX       | "           | "  | "              |
| 3/9/19  |           | 31 (1)    | CIEANOS         | "   | "   | "           | "              | metacam 0.1ml<br>morgain 0.008ml<br>isoflurane 2% |         | post-op 24h | PDX       | "           | "  | "              |
| "       |           | 32 (2)    | CIEANOS         | "   | "   | "           | "              | metacam 0.1ml<br>morgain 0.008ml<br>isoflurane 2% |         | post-op 24h | PDX       | "           | "  | "              |
| "       |           | 33 (3)    | CIEANOS         | "   | "   | "           | "              | metacam 0.1ml<br>morgain 0.008ml<br>isoflurane 2% |         | post-op 24h | PDX       | "           | "  | "              |
| "       |           | 18 (4)    | CIEANOS         | "   | "   | "           | "              | metacam 0.1ml<br>morgain 0.008ml<br>isoflurane 2% |         | post-op 24h | PDX       | "           | "  | "              |

Supplementary figure 2-2. Picture of anesthesia logs

## Supplementary file 3

### Procedure for euthanization, blood- and tissue sampling of CIA NOG mice

#### Human endpoints:

- 8 weeks treatment with Smartfish Remune with fishoil or placebo
- Tumor volume ~1500 mm<sup>3</sup> or >10 % loss of body weight

#### Procedure:

1. Register mouse weight
2. Put mouse into anesthesia chamber with isoflurane 2% (O<sub>2</sub>, N<sub>2</sub>O)
3. Place the mouse on the back on a heating pad with surgery tissue and anesthesia mask
4. Take blood sample by heart punctation
  - a. Collect full blood in a EDTA tube
  - b. Spot 50 µl full blood onto a Whatman filtercard (dry 2 h at RT, freeze -80°C)
  - c. Mark blood cards with mouse name and date
5. Centrifuge EDTA tube to prepare blood plasma (4°C, 3000 rpm, 10 min)
6. Measure tumor size
7. Shave and wash (EtOH) the tumor area
8. Cut out the PDX using a scalpel
  - a. Remove necrotic tissue/connective tissue
  - b. Take 4 samples from the tumor (Histology prioritized if small PDX)
    - i. 4x4x4 mm for **histology** in a tube with 4% NBF
    - ii. 4x4x4 mm for **RNA-sekvensering** in a cryotube (snapfreeze N<sub>2</sub>, then -80°C)
    - iii. 4x4x4 for **protein** isolation in cryotubes (snapfreeze in N<sub>2</sub>, then -80°C)
    - iv. The rest of the PDX is frozen in fragments in cryotube (snapfreeze N<sub>2</sub>, -80°C)
9. Wash (EtOH) and open the abdomen
10. Cut the aorta
11. Shut of the anastesia gas
12. Perform necroscopy
  - a. Organs are sampled on tubes with 4% NBF
13. Fill out autopsy card
14. Pipett the blood plasma into a sterile tube and freeze at -80°C
15. Mark plasma tubes (mouse ID, plasma, date and initials)

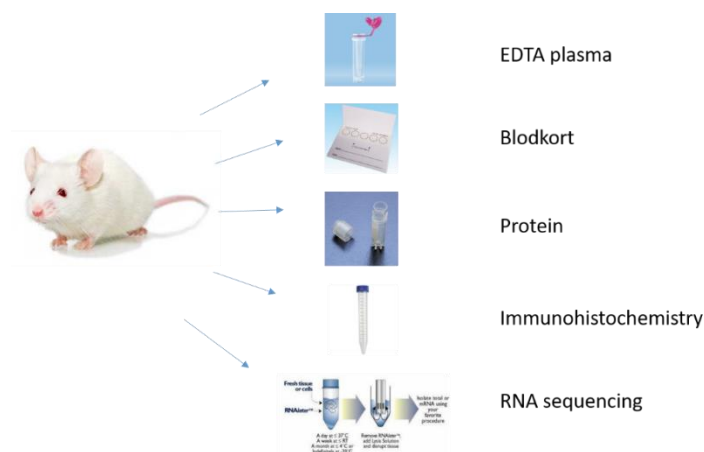



# Supplementary material 4: Mice weight curves

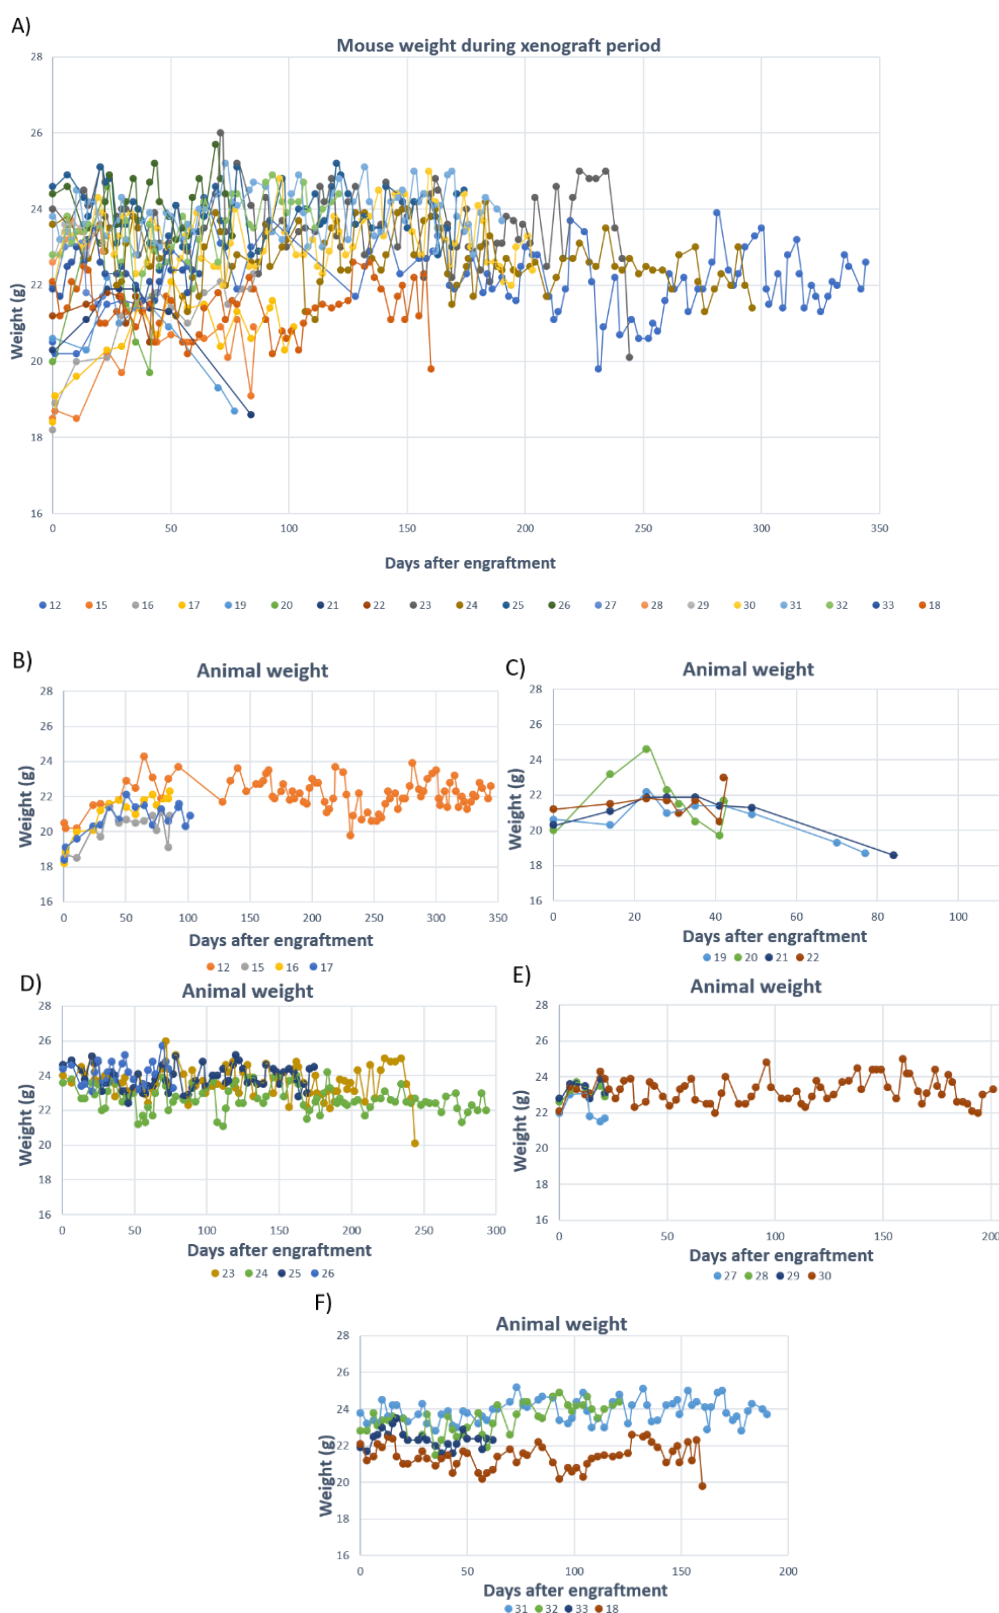

**Supplementary figure 4-1.** Animal weight curves for A) all mice B) mouse #12, 15, 16 and 17 (tumor fragments from patient 3), C) mouse #19, 20, 21 and 22 (tumor fragments from patient 11), D) mouse #23, 24, 25 and 26 (tumor fragments from patient 17), E) mouse #27, 28, 29 and 30 (tumor fragments from patient 18), and F) mouse #31, 32, 33 and 18 (tumor fragments from patient 19).

## Supplementary file 5

Supplementary Table 5-1. Fatty acid profiling of patient and mouse whole blood

| Sample ID                 | Tumor fragment | Treatment status | Fatty acid methyl ester content (g FAME / 100 g FAME) |          |              |              |               |               |                |              |               |               |               | Omega-3 index |
|---------------------------|----------------|------------------|-------------------------------------------------------|----------|--------------|--------------|---------------|---------------|----------------|--------------|---------------|---------------|---------------|---------------|
|                           |                |                  | C16:0 PA                                              | C18:0 SA | C18:1 c-9 OA | C18:2 n-6 LA | C18:3 n-6 GLA | C18:3 n-3 ALA | C20:3 n-6 DGLA | C20:4 n-6 AA | C20:5 n-3 EPA | C22:5 n-3 DPA | C22:6 n-3 DHA |               |
| P3                        |                |                  | 25.7                                                  | 16.2     | 23.7         | 19.7         | 0.08          | 0.39          | 1.17           | 8.13         | 0.85          | 1.05          | 2.89          | 6.12          |
| P11                       |                |                  | 29.0                                                  | 12.9     | 24.6         | 22.0         | 0.10          | 0.60          | 1.18           | 5.97         | 0.91          | 0.80          | 1.90          | 4.99          |
| P17                       |                |                  | 31.3                                                  | 13.0     | 24.1         | 19.0         | 0.28          | 0.44          | 0.97           | 4.89         | <b>2.02</b>   | 0.92          | <b>3.07</b>   | 8.00          |
| P18                       |                |                  | 26.7                                                  | 15.8     | 24.3         | 19.1         | 0.20          | 0.30          | 1.28           | 8.15         | 0.83          | 1.13          | 2.29          | 5.35          |
| P19                       |                |                  | 29.6                                                  | 14.8     | 26.2         | 17.4         | 0.19          | 0.33          | 1.58           | 6.88         | 0.47          | 0.89          | 1.64          | 4.06          |
| M12                       | P3-1a          | No               | 34.9                                                  | 14.5     | 18.6         | 14.8         | 0.16          | 0.13          | 0.72           | 12.9         | 0.10          | 0.35          | 2.81          | 4.98          |
| M15                       | P3-1b          | Start            | 35.4                                                  | 15.3     | 15.9         | 18.0         | 0.16          | 0.20          | 0.67           | 11.9         | 0.07          | 0.25          | 2.25          | 4.24          |
| M15                       | P3-1b          | PLACEBO          | 35.3                                                  | 12.9     | 20.4         | 17.4         | 0.18          | 0.18          | 0.98           | 9.45         | 0.24          | 0.39          | 2.66          | 4.99          |
| M16                       | P3-2a          | Start            | 34.7                                                  | 15.6     | 15.8         | 17.2         | 0.16          | 0.19          | 0.71           | 12.5         | 0.08          | 0.32          | 2.71          | 4.98          |
| M16                       | P3-2a          | OMEGA-3          | 33.1                                                  | 15.0     | 18.1         | 17.1         | 0.12          | 0.19          | 1.03           | 7.30         | 2.02          | 0.71          | 5.34          | 10.80         |
| M17                       | P3-2b          | Start            | 33.8                                                  | 14.2     | 19.8         | 17.9         | 0.17          | 0.36          | 0.65           | 10.5         | 0.09          | 0.31          | 2.24          | 4.26          |
| M18                       | P19-2b         | No               | 35.6                                                  | 13.6     | 17.2         | 18.9         | 0.20          | 0.34          | 0.53           | 11.0         | 0.07          | 0.22          | 2.36          | 4.37          |
| M19                       | P11-1a         | OMEGA-3          | 32.1                                                  | 15.5     | 16.6         | 12.4         | 0.18          | 0.15          | 0.80           | 8.72         | 6.30          | 0.77          | 6.43          | 17.9          |
| M20                       | P11-1b         | Start            | 32.9                                                  | 15.5     | 15.3         | 16.2         | 0.15          | 0.12          | 0.67           | 15.3         | 0.06          | 0.35          | 3.43          | 5.66          |
| M20                       | P11-1b         | PLACEBO          | 35.4                                                  | 11.7     | 22.0         | 19.8         | 0.17          | 0.18          | 0.72           | 7.68         | 0.19          | 0.25          | 1.93          | 4.01          |
| M22                       | P11-2b         | Start            | 33.0                                                  | 16.1     | 14.5         | 15.6         | 0.13          | 0.11          | 0.83           | 15.8         | 0.09          | 0.37          | 3.47          | 5.75          |
| M22                       | P11-2b         | OMEGA-3          | 35.3                                                  | 12.1     | 23.3         | 18.2         | 0.15          | 0.20          | 0.83           | 7.47         | 0.17          | 0.23          | 2.01          | 4.09          |
| M23                       | P17-1a         | Start            | 34.7                                                  | 14.6     | 19.5         | 15.4         | 0.14          | 0.14          | 0.69           | 12.1         | 0.09          | 0.26          | 2.46          | 4.53          |
| M23                       | P17-1a         | PLACEBO          | 30.5                                                  | 15.2     | 22.4         | 14.5         | 0.14          | 0.11          | 1.07           | 10.7         | 0.50          | 0.49          | 4.48          | 7.62          |
| M24                       | P17-1b         | No               | 34.1                                                  | 14.7     | 15.9         | 15.5         | 0.12          | 0.14          | 0.82           | 15.2         | 0.10          | 0.25          | 3.20          | 5.43          |
| M25                       | P17-2a         | No               | 35.6                                                  | 15.9     | 16.3         | 15.7         | 0.20          | 0.18          | 0.74           | 12.1         | 0.12          | 0.41          | 2.75          | 4.93          |
| M26                       | P17-2b         | Start            | 35.6                                                  | 14.2     | 18.5         | 16.3         | 0.16          | 0.20          | 0.69           | 11.5         | 0.10          | 0.28          | 2.48          | 4.57          |
| M26                       | P17-2b         | OMEGA-3          | 32.3                                                  | 14.7     | 19.2         | 17.1         | 0.15          | 0.22          | 0.91           | 9.45         | 0.31          | 0.64          | 5.07          | 8.09          |
| M27                       | P18-1a         | Start            | 34.3                                                  | 16.0     | 14.7         | 15.7         | 0.16          | 0.15          | 0.92           | 14.2         | 0.11          | 0.36          | 3.38          | 5.68          |
| M27                       | P18-1a         | OMEGA-3          | 32.9                                                  | 15.8     | 16.8         | 17.3         | 0.21          | 0.17          | 0.97           | 12.1         | 0.17          | 0.36          | 3.20          | 5.56          |
| M28                       | P18-1b         | Start            | 34.0                                                  | 16.3     | 15.2         | 14.6         | 0.16          | 0.11          | 0.84           | 14.7         | 0.11          | 0.40          | 3.63          | 6.00          |
| M28                       | P18-1b         | PLACEBO          | 33.2                                                  | 15.7     | 17.2         | 17.6         | 0.18          | 0.23          | 0.71           | 10.8         | 0.26          | 0.45          | 3.73          | 6.33          |
| M29                       | P18-2a         | OMEGA-3          | 33.5                                                  | 15.2     | 17.7         | 18.4         | 0.10          | 0.24          | 0.77           | 7.91         | 1.60          | 0.49          | 4.14          | 8.72          |
| M30                       | P18-2b         | No               | 32.2                                                  | 16.9     | 15.9         | 14.9         | 0.12          | 0.12          | 0.78           | 15.7         | 0.08          | 0.31          | 3.14          | 5.35          |
| M31                       | P19-1a         | No               | 33.8                                                  | 15.7     | 17.2         | 13.5         | 0.13          | 0.11          | 0.76           | 15.1         | 0.07          | 0.34          | 3.28          | 5.51          |
| M33                       | P19-2a         | No               | 34.0                                                  | 14.8     | 18.4         | 17.6         | 0.19          | 0.27          | 0.69           | 11.5         | 0.07          | 0.21          | 2.32          | 4.33          |
| Average untreated mice    |                |                  | 34.29                                                 | 15.24    | 16.79        | 16.11        | 0.16          | 0.18          | 0.73           | 13.25        | 0.09          | 0.31          | 2.87          | 5.03          |
| Standard deviation        |                |                  | 1.02                                                  | 0.91     | 1.70         | 1.46         | 0.03          | 0.08          | 0.09           | 1.84         | 0.02          | 0.06          | 0.49          | 0.60          |
| Average Smartfish treated |                |                  | 33.20                                                 | 14.72    | 18.62        | 16.75        | 0.15          | 0.20          | 0.89           | 8.83         | 1.76          | 0.53          | 4.37          | 9.19          |
| Standard deviation        |                |                  | 1.15                                                  | 1.34     | 2.48         | 2.20         | 0.04          | 0.03          | 0.10           | 1.80         | 2.36          | 0.21          | 1.59          | 4.88          |
| Average Placebo treated   |                |                  | 33.60                                                 | 13.88    | 20.50        | 17.33        | 0.17          | 0.18          | 0.87           | 9.66         | 0.30          | 0.40          | 3.20          | 5.74          |
| Standard deviation        |                |                  | 2.30                                                  | 1.89     | 2.36         | 2.17         | 0.02          | 0.05          | 0.18           | 1.45         | 0.14          | 0.11          | 1.13          | 1.57          |

P=patient, M=mouse, FAME=fatty acid methyl ester, No=no treatment given, OMEGA-3=Smartfish Remune with fish oil, PLACEBO=Smartfish Remune Placebo with rapeseed oil



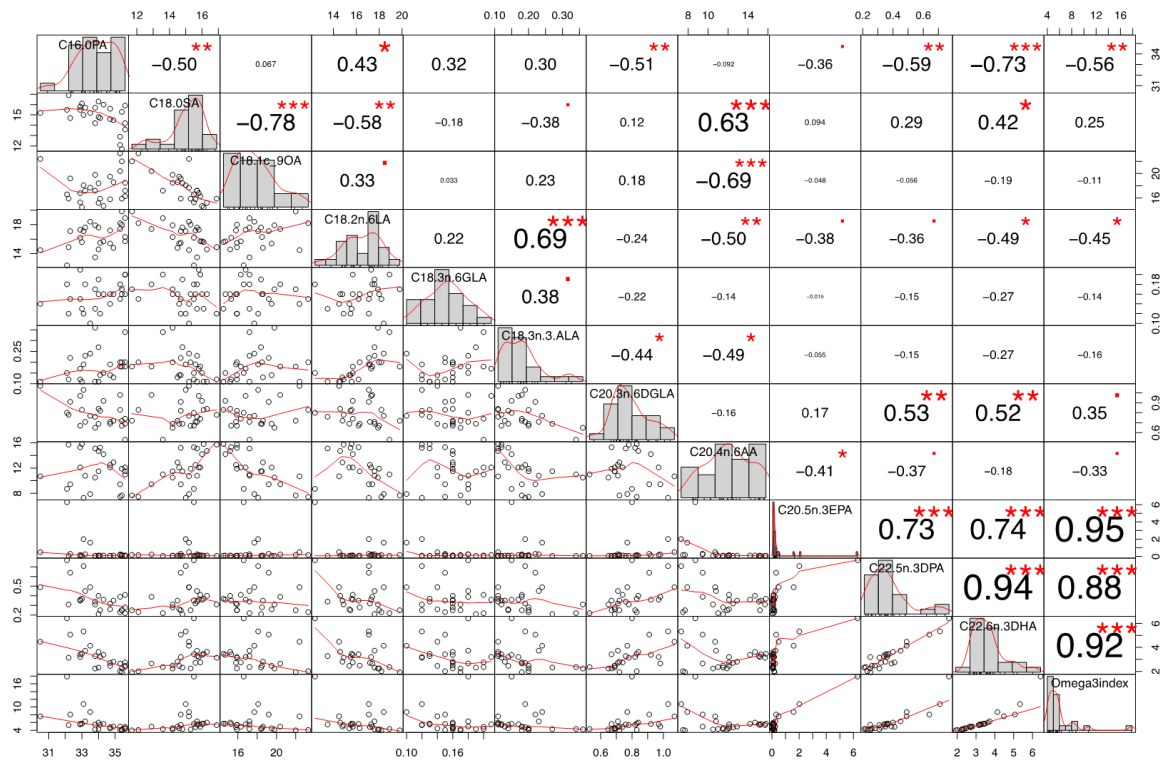

**Supplementary figure 5-1.** Correlation in values for different fatty acids measured in mouse whole blood.
